# Supplementary material for: Unique mutation and gene expression in High Hyperdiploid Acute Lymphoblastic Leukaemia with whole chromosome uniparental isodisomy
Source: Research Square preprint supplement (doi:10.21203/rs.3.rs-1349722/v1), 2022-02-16
Supplement: Supplementary file 2 [file 5638a023be53d7232da5b51f.xlsx]

## Sheet: Sheet1
Supplementary Table 1: Clinicopathological and cytogenetic profile of 58 HH patients
UPN	Gender	Age	WBC Count at presentation	Cytogenetics	FISH	Blast %	FCM MRD	Final Risk	Cytoscan-HD Analysis	Mutation Analysis	RNA sequencing
1	M	2.66	33400	62~68<3n>,XY,+X,-1,-2,-3,+4,+5,+8,+10,der(11)t(11;?)(q25;?),-13,+14,-15,+17,+18,-19,-20,+21,-22,+1~2mar[cp15]	MLL 3 copies - [80 %] , BCR 3copies ,ABL1-3copies [87%], RUNX1 - 4 copies [70%], RUNX1 -3copies [17%], RUNX1 - 4copies [12%]	90	negative	SR	Yes	Yes	Yes
2	M	2.09	33000	56,XY,+X,+4,+5,+6,+8,+10,+14,+15,+17,+18,+21,+21[cp2]	RUNX1 4 copies [82%] RUNX1 3copies [13%] RUNX1 2 copies [05%], MLL2copies [100%] BCR 2copies ,ABL1-2copies [100%]	88	negative	HR	Yes	No	No
3	F	2.92	13230	60,XX,+X,+X+4,+5,+6,+9,+10,+14,+17,+18,+18,+21,+21,+mar[cp7]	RUNX1 - 4 copies [82%] RUNX1 - 3 copies [11%] RUNX1 - 2 copies [07%] BCR 2copies, ABL1-3copies [92%] BCR 2copies ,ABL1-2copies[08%]	94	negative	SR	Yes	Yes	No
4	F	2.84	20900	46,XX[2]. nuc ish (ETV6 × 2),(RUNX1 × 4) [94%]	RUNX1 - 4 copies [94%] RUNX1 - 2 copies [06%]	89	x	x	Yes	Yes	No
5	F	6.3	16400	46,XX[3]. nuc ish (ETV6 × 2),(RUNX1 × 4) [37%]. nuc ish (ETV6 × 2),(RUNX1 × 5) [31%].nuc ish(ETV6 × 3),(RUNX1 × 5) [21%]	RUNX1 - 4 copies [37%] RUNX1 - 5 copies [31%] RUNX1 - 5 copies [21%] RUNX1 - 2 copies [11%] BCR 2copies ,ABL1-2copies [100%] MLL 3 copies - [86%] MLL 2 copies - [14%]	85	POSITIVE(0.04)	HR	Yes	Yes	No
6	M	3.6	3600	54~56,XY,+X,+4,+6,+8,+10,+14,+17,+18,+21,+21[cp3]/46,XY[6]nuc ish (ETV6 × 2),(RUNX1 × 4) nuc ish (ETV6 × 2),(RUNX1 × 3)	RUNX1 - 4 copies [53%] RUNX1 - 3 copies [21%] RUNX1 - 2 copies [26%] BCR 2copies ,ABL1-2copies [100%] MLL 2 copies - [100%]	77	negative	SR	Yes	No	No
7	F	6	34700	46,XX[6]. nuc ish (ETV6 × 2),(RUNX1 × 4) - 144 [72%]/ nuc ish (ETV6 × 2),(RUNX1 × 3) - 20[10%]/ nuc ish (MLL×3) - 150 [75%]	RUNX1 - 4 copies [72%] RUNX1 - 3 copies [10%] RUNX1 - 2 copies[18%] BCR 2copies ,ABL1-2copies [100%] MLL 3 copies - [75%] MLL 2 copies - [25%]	65	negative	SR	Yes	Yes	No
8	F	9.83	3100	56~59,XX,+X,+4,+6,+7,+8,+9,+10,+11,+12,+14,+16,+17,+18,+19,+21,+21,+1~2mar[cp8]/46,XX[7]	RUNX1 - 4 copies [82%] RUNX1 - 3 copies [10%]. BCR 2copies, ABL1-3copies[73%], MLL neg	92	negative	SR	Yes	Yes	Yes
9	M	1.97	8700	56~57,XY,+X,+4,+6,+8,+10,+13,+14,+17,+18,+18,+21,+21,+21,+22,+mar[cp11]/46,XY[9]	RUNX1 - 5 copies [53%], RUNX1 - 4 copies [35%], neg for MLL rearangement & BCR-ABL fusion	91	X	X	Yes	Yes	No
10	F	2.37	61000	53~55,XX,+X,+6,+8,+10,+14,+17,+18,+21,+21,+mar[cp7]/46,XX[3]	RUNX1 - 4 copies [78%] RUNX1 - 3 copies [12%] RUNX1 - 2 copies [10%] BCR 2copies, ABL1-2copies [100%] MLL 2 copies [100%] E2A 2 copies [100%]	91	negative	HR	Yes	Yes	No
11	F	4.03	32400	58~60,XX,+X,+4,+5,+6,+8,+10,+11,+14,+17,+18,+der(19)t(1;19) (q23;p13),+21,+21,+1~3mar[cp8]/46,XX[4]	RUNX1 - 4 copies [94%] RUNX1 - 2 copies [6%] BCR 2copies, ABL1-2copies [100%] MLL 3 copies [79%] MLL 2 copies [21% ]	89	negative	SR	Yes	Yes	Yes
12	M	3.36	23600	60~64,XY,+X,+1,+2,+3,+4,+5,+6,+8,+9,+10,+der(11)t(11;?) (q24;?),+15,+17,+18,+21,+21,+2mar[cp5]	RUNX1 - 4 copies [94%] RUNX1 - 2 copies [6%] BCR 2copies, ABL1-2copies [100%] MLL 3 copies [74%] MLL 2 copies [26% ]	88	negative	HR	Yes	Yes	Yes
13	F	2.97	20700	63,XX,+X,+3,+4,+6,+8,+10,+11,+12,+14,+15,+16,+17,+18,+19,+20,+21,+21[1]/46,XX[1] nuc ish (ETV6 × 3),(RUNX1 × 4)- [92%]. nuc ish (BCR×3), (ABL1×2) - [39%]. nuc ish (MLL×3) - [74%]	RUNX1 - 4 copies [92%] RUNX1 - 2 copies [8%] BCR 3copies, ABL1-2copies [39%] BCR 2copies, ABL1-2copies [61%] MLL 3 copies [74%] MLL 2 copies [26% ]	93	negative	IR	Yes	No	Yes
14	F	3.83	14800	57,XX,+X,trp(1)(q21q31),+4,+8,+10,+14,+17,+18,+19,+21,+21,+mar[cp2]/46,XX[2]. nuc ish (ETV6 × 2),(RUNX1 ×4) [59%]	RUNX1 - 4 copies [59%] RUNX1 - 2 copies [41%] BCR 2copies, ABL1-2copies [100%] MLL 2 copies [100%]	55	POSITIVE(0.033)	HR	Yes	Yes	No
15	F	4.43	9900	58,XX,+X,+5,+6,+9,+10,+11,+14,+17,+17,+18,+21[1]/46,XX[1]. nuc ish (ETV6 × 2),(RUNX1 × 4) [56%]. nuc ish (ETV6 × 2),(RUNX1 × 3) [12%]. nuc ish (MLL×3) [60%]	RUNX1 - 4 copies[56%] RUNX1 - 4 copie3 [12%] RUNX1 - 2 copies [32%] BCR 2copies, ABL1-2copies [100%] MLL 3 copies [60%] MLL 2 copies [40%]	85	POSITIVE(0.02)	HR	Yes	No	No
16	F	10.08	2400	53~56,XX,+X,+4,+6,+8,+10,+14,+15,+17,+18,+20,+21,+21,+1~2mar[cp9]/46,XX[11]	RUNX1 - 4 copies [68%] RUNX1 - 3 copies [18%] RUNX1 - 2 copies[14%] BCR 2copies, ABL1-2copies [100%] MLL 2 copies [100%]	87	negative	IR	Yes	Yes	No
17	M	1.38	26600	2~57,XY,+X,+4,+6,+8,+10,+14,+17,+18,+20,+21,+21,+22,+1~2mar[cp6]/46,XY[9]	RUNX1 - 4 copies [86%] RUNX1 - 2 copies [14%] BCR 2copies, ABL1-2copies [100%] MLL 2 copies [100%]	92	negative	SR	Yes	No	Yes
18	M	2.91	3800	54~55,XY,+X,+4,+6,+8,+10,+14,+18,der(19)t(1;19)(q23;p13),+21,+21[cp2]/46,XY[18]	RUNX1 - 4 copies [67%] RUNX1 - 3 copies [9%] RUNX1 - 2 copies [24%] BCR 2copies, ABL1-2copies [100%] MLL 2 copies [100%]	86	negative	SR	Yes	No	Yes
19	F	2.54	20000	54~55,XX,+X,dup(1)(q21q31),+4,+6,+8,+10,+14,+18,+21,+21,+1~2mar[cp3]/46,XX[2]	RUNX1 - 4 copies [84%] RUNX1 - 3 copies [10%] RUNX1 - 2 copies [6%] BCR 2copies, ABL1-2copies [100%] MLL 2 copies [100%]	89	negative	SR	Yes	No	Yes
20	M	3.36	6270	52~53,XY,+X,+4,+9,+14,+21,+21,+1~2mar[cp2]/46,XY[18]	RUNX1 - 4 copies [59%] RUNX1 - 3 copies [15%] RUNX1 - 2 copies [26%] BCR 2copies, ABL1-3copies [63%] BCR 2copies, ABL1-2copies [37%] MLL 2 copies [100%]	88	POSITIVE(2.31)	HR	Yes	Yes	No
21	M	2.8	31500	54~55,XY,+X,dup(1)(q21q31),+4,+del(6)(q16q25),+8,+10,+11,+14,+17,+18,+19,+20,+21,+21,+22,+mar[cp16]/ 46,XY[2]	RUNX1 - 4 copies [92%] RUNX1 - 2 copies [08%]	92	negative	SR	Yes	No	No
22	M	6	9800	59,XY,+X,+4,+6,+8,+10,+10,+11,+12,+13,+18,+21,+21,+ 2mar[1]/46,XY[19]	RUNX1 - 4 copies [69%] RUNX1 - 4 copies [6%] RUNX1 - 2 copies [25%] BCR 2copies, ABL1-2copies [100%] MLL 3 copies [82%] MLL 2 copies [18%]	0.59	negative	SR	Yes	No	Yes
23	M	5	6000	53~55,XY,+X,+4,+6,+8,+9,+10,+14,+18,+21,+21[cp6]/46,XY[14]	RUNX1 - 4 copies [58%] RUNX1 - 3 copies [11%] RUNX1 - 2 copies [31%] BCR 2copies, ABL1-3copies [16%] BCR 2copies, ABL1-2copies [84%] MLL 2 copies [100%]	83	Negative (0.006)	SR	Yes	Yes	Yes
24	F	2.75	59000	52~57,XX,+4,+6,+8,+10,+14,+17,+18,+21,+21,+1~2 mar[cp5]/46,XX[2]	RUNX1 - 4 copies [80%] RUNX1 - 3 copies [10%] RUNX1 - 2 copies [10%] BCR 2copies, ABL1-3copies [6%] BCR 2copies, ABL1-2copies [94%] MLL 3 copies [8%] MLL 2 copies [92%]	0.91	POSITIVE (1.34)	HR	Yes	Yes	Yes
25	F	5	46000	46,XX[6].nuc ish (ETV6 × 2),(RUNX1 × 4) - [78%].nuc ish (ETV6 × 2),(RUNX1 × 3) - [12%].nuc ish (BCR×3), (ABL1×2) -[72%].nuc ish (MLL×3) -[78%]	RUNX1 - 4 copies [78%] RUNX1 - 3 copies [12%] RUNX1 - 2 copies [10] BCR 3copies, ABL1-2copies [72%] BCR 2copies, ABL1-2copies [28%] MLL 3 copies [78%] MLL 2 copies [22%]	0.82	negative	HR	Yes	Yes	Yes
26	M	4	9200	46,XY[5].nuc ish (ETV6 × 2),(RUNX1 × 4) - [94%]	RUNX1 - 4 copies [94%] RUNX1 - 2 copies[6%] BCR 2copies, ABL1-2copies [100%] MLL 2 copies [100%]	0.88	negative	HR	Yes	Yes	Yes
27	F	5	5100	46,XX[20]. nuc ish (ETV6 × 2),(RUNX1 × 4) - [25%]. nuc ish (BCR×2), (ABL1×3) -[19%]. nuc ish(ABL1×3)- [22%]	RUNX1 - 4 copies [25%] RUNX1 - 2 copies [75%] BCR 2copies, ABL1-3copies [19%] BCR 2copies, ABL1-2copies [81%] MLL 2 copies [100%]	0.26	negative	SR	Yes	No	No
28	M	4	11000	46,XY[8]. nuc ish (ETV6 × 2),(RUNX1 × 3) - [68%]	RUNX1 - 3 copies[68%] RUNX1 - 2 copies [32%] BCR 2copies, ABL1-2copies [100%] MLL 2 copies[100%]	0.91	negative	SR	Yes	Yes	Yes
29	M	4	23360	non analyzable poor quality metaphases	RUNX1 - 4 copies [70%] RUNX1 - 3 copies[18%] RUNX1 - 2 copies [12%] BCR 2copies, ABL1-2copies [100%] MLL 2 copies [100%]		NOT DONE	IR	Yes	Yes	No
30	F	3	12500	51~53,XX,+X,+4,+6,+8,+10,+14,+17,+18,+21,+1~2mar[cp19]	RUNX1 - 3 copies [83%] RUNX1 - 2 copies [17] BCR 2copies, ABL1-2copies [100%] MLL 2 copies [100%]	0.78	negative	SR	Yes	Yes	No
31	M	2	14600	55,XY,+4,+6,+10,+14,+17,+18,+21,+21,+mar[1]/46,XY[7]. nuc ish (ETV6 ×2),(RUNX1 × 4) -[89%]	RUNX1 - 4 copies [89%] RUNX1 - 2 copies [11%] BCR 2copies, ABL1-2copies [100%] MLL 2 copies [100%]	0.9	negative	IR	Yes	Yes	No
32	M	2	25800	46,XY[2]. nuc ish (ETV6 × 2),(RUNX1 × 3) - [80%]	RUNX1 - 3 copies [80%] RUNX1 - 2 copies [20%] BCR 2copies, ABL1-2copies [100%] MLL 2 copies [100%]	0.82	positive (0.06)	HR	Yes	Yes	Yes
33	M	4.5	9900	51~54,XY,+X,+4,+5,+6,+8,+10,+14,+18,+21,+21[cp6]/46,XY[1]	RUNX1 - 4 copies [77%]	87.4	negative	SR	Yes	No	Yes
34	M	2.5	4900	54~56,XY,+X,+4,+6,+8,+10,+14,+15,+17,+18,+21,+21,+22[cp8]/46,XY[7]	RUNX1 - 4 copies [67%] RUNX1 - 3 copies [19%] RUNX1 - 2 copies [14%] BCR 2copies, ABL1-2copies [100%] MLL 2 copies [100%]	93.6	positive (0.27%)	HR	Yes	Yes	Yes
35	F	4.2	8300	51~55,XX,+X,+6,+14,+17,+18,+21,+21,+1~2mar[cp6]/46,XX[3]	RUNX1 - 4 copies [85%] RUNX1 - 2 copies [15%] BCR 2copies, ABL1-2copies [100%] KMT2A 2copies [100%]	0.9	negative	SR	Yes	Yes	No
36	F	2.75	4800	55~58,XX,+X,+4,+6,+8,+10,+14,+14,+17,+18,+21,+21,+1~4mar[cp4]	RUNX1 - 4 copies [79%] RUNX1 - 3 copies [15%] RUNX1 - 2 copies [6%] BCR 2copies, ABL1-2copies [100%] KMT2A 2 Copies [100%] TCF31copy [83% ] TCF3 2copies [17% ]	81	negative	HR	Yes	Yes	Yes
37	M	5 .5	60000	54~58,XY,+X,+6,+8,+10,+14,+15,+17,+18,+19,+21,+21,+1~2mar[cp9]/46,XY[2].	RUNX1 - 4 copies [84%] RUNX1 - 3 copies [11%] RUNX1- 2 copies [4%] BCR 2copies, ABL1-2copies [100%] KMT2A 2copies [100%]	0.84	positive (1.62%)	HR	Yes	No	No
38	M	2.2	3500	49,XY,+X,-2,-4,+14,+17,+21,+21,+mar[1]/46,XY[5]. nuc ish (ETV6 × 2),(RUNX1 × 4) - [45%]. nuc ish (ETV6 × 2),(RUNX1 × 3) - [17%].nuc ish (CRLF2×3) - [50% ]	RUNX1 - 4 copies [45%] RUNX1 - 3 copies [17%] RUNX1 - 2 copies [38%] BCR 2copies, ABL1-2copies [100%] MLL 2 copies [100%] CRLF2 3copies [50% ] CRLF2 2copies [50% ]	63	negative	SR	Yes	No	No
39	M	2.5	5300	54~56,XY,+X,+4,+6,+8,+9,+10,+14,+17,+18,+21,+21,+mar[cp2]. nuc ish (ETV6 × 2),(RUNX1 × 4) - [75%].nuc ish (ETV6 × 2),(RUNX1 × 3) - [20%]	RUNX1 - 4 copies [75%] RUNX1 - 3 copies [20%] RUNX1 - 2 copies [5%] BCR 2copies, ABL1-2copies[100%] MLL 2 copies[100%]		borderline positive 0.011%	HR	Yes	Yes	No
40	F	10.75	55670	52~56,XX,+X,+4,+6,+12,+14,+16,+17,+18,+21,+21[cp2]/46,XX[1]. nuc ish (ETV6 × 3),(RUNX1 × 3) - [80%].nuc ish (ETV6 × 2),(RUNX1 × 3) – [10%]	RUNX1 - 3 copies [80%] RUNX1 - 3 copies [10%] RUNX1 - 2 copies [10%] BCR 2copies, ABL1-2copies [100%] MLL 2 copies[100%] TCF3×1copy [9% ] TCF3×2 copies 182 [91% ]	96	negative	IR	Yes	Yes	No
41	M	1.8	22600	54,XY,+X,+4,+6,+8,+10,+14,+19,+21,+21[cp2]/46,XY[4]	RUNX1 - 4 copies [80%] RUNX1 - 4 copies [10%] RUNX1 - 2 copies[10%] BCR 2copies, ABL1-2copies [100%] MLL 2 copies [100%] TCF3 1copy [9% ] TCF3 2copies [91% ]	93	negative	IR	Yes	Yes	No
42	F		24700	63~64,XX,+X,+3,+4,+5,+6,+8,+10,+11,+12,+14,+15,+16,+17,+18,+21,+21,+22,+1~2mar [cp3]/46,XX[1]	RUNX1 4 copies [62%] RUNX1 - 4 copies [15%] RUNX1 - 3 copies [17%] RUNX1 - 2 copies [6%] BCR 3copies, ABL1-2copies [72%] BCR 2copies, ABL1-2copies [28%] KMT2A 3copies [86%] KMT2A 2copies [14%]	90	MRD is less than 0.01% (Negative MRD)	SR	Yes	No	No
43	M	1	7100	55~58,XY,+X,dup(1)(q21q32),+4,+6,+8,+9,+14,+14,+17,+18,+18,+21,+21[cp3]/46,XY[1]	RUNX1 - 4 copies - 150 [75%] RUNX1 - 2 copies [25%] BCR 2copies, ABL1-3copies [51%] BCR 2copies, ABL1-2copies [49%] MLL 2 copies[100%]	88	negative (0.0069%)	SR	Yes	No	Yes
44	F	3.1	24500	50~52,XX,+X,+4,+6,+10,+14,+17,+18,+21,+mar[cp14]	RUNX1 - 3 copies [30%] RUNX1 - 2 copies [70%] BCR 2copies, ABL1-2copies [100%] MLL 2 copies[100%]	54	positive (0.2%)	HR	Yes	Yes	Yes
45	M	2.3	9700	62,XY,+X,+4,+5,+6,+10,+12,+14,+17,+18,+18,+21,+21,+22,+2mar[1]/46,XY[19].	RUNX1 - 4 copies[49%] RUNX1 - 3 copies[39%] BCR 3copies, ABL1-2copies[68%]	60	Negative MRD (less than 0.01%)	SR	Yes	Yes	No
46	M	4.3	11900	53~57,XY,+X,dup(1)(q12q31),+4,+6,+8,+10,+14,+17,+18,+21,+21,+1~2mar[cp6] /46,XY[14]	RUNX1 - 4 copies [82%] RUNX1 - 2 copies [18%]	85	Positive MRD ( 0.0116%).	HR	Yes	Yes	Yes
47	M	4.9	16400	52~54,XY,+X,+4,+4,i(7)(q10),+10,+14,+18,+18,+21, [cp2]/46,XY[16]	RUNX1 - 3 copies [59%] RUNX1 - 4 copies [08%] RUNX1 - 4 copies [33%]	87	MRD is less than 0.01% (Negative MRD)	IR	Yes	Yes	Yes
48	F	4.1	18300	58~62,XX,+X,+2,+4,+5,+6,+8,+9,+10,+11,+12,+14,+14,+17,+18,+18,+21,+21,+21[cp2]/46,XX[7]	RUNX1 - 4 copies [62%] RUNX1 - 5 copies [35%] RUNX1 - 2 copies[03%]	86	MRD is less than 0.01% (Negative MRD	SR	Yes	Yes	No
49	M		9300	54~55,XY,+X,+4,+6,+10,+14,+18,+21,+21,+mar[cp18]	RUNX1 - 4 copies [82%] RUNX1 - 3 copies [10%] RUNX1 - 2 copies [08%]	72	MRD is 0.0059%	HR	Yes	Yes	Yes
50	M		5440	46,XY[5].	RUNX1 - 4 copies [57%]. RUNX1 - 4 copies [19%]. BCR 2copies, ABL1-3copies [27%]	34	MRD is less than 0.01% (Negative MRD).	HR	Yes	Yes	No
51	F	7.1	5770	51~55,XX,+X,1q21h+,1p13h+,-2,der(3)t(3;?) (q24;?),+8,+9,+14,+17,+18,+21,+21,+21,+1~2mar[cp10]/46,XX[1]	RUNX1 - 5 copies [76%] RUNX1 - 4 copies [15%] RUNX1 - 2 copies [09%] BCR 2copies, ABL1-3copies [72%] BCR 2copies, ABL1-2copies [28%]	88	MRD is 0.017%. (Positive MRD)	HR	Yes	Yes	Yes
52	M	5.9	21100	64,XY,+X,+2,+4,+5,+6,+10,+11,+13,+14,+17,+18,+18,+19,+20,+21,+21,+22,+mar[1]/46,XY[1].	RUNX1 - 4 copies [80%]. RUNX1 - 3 copies[07%] BCR 3copies, ABL1-2copies [75%] KMT2A 3copies[83%]	79	Negative MRD (less than 0.01%)	IR	Yes	Yes	Yes
53	M	6.6	1900	52~53,XY,+4,+6,+8,+10,+14,+17,+18,+21,+21[cp2]/46,XY[18].	RUNX1 - 4 copies [84%] RUNX1 - 3 copies[10%] BCR 2copies, ABL1-3copies [18%]	80	Positive (0.14%)	HR	Yes	No	Yes
54	F	7.1	184600	53~54,XX,dup(1)(q21q31),+4,+5,+8,+14,+17,+18,+21[cp2]/46,XX[1]	RUNX1 - 3 copies [91%] RUNX1 - 2 copies [09%]	90	Negative MRD (less than 0.01%)	HR	Yes	Yes	Yes
55	F	3.6	2900	46,XX[12]	RUNX1 - 4 copies [75%]	76	Positive MRD (0.09%).	HR	Yes	Yes	No
56	F	8.4	61600	61~65,XX,+X,dup(1)(q21q31),+2,+4,+5,+6,+8,+10,+11,+12,+14,+18, +21,+21,+22,+mar [cp2]/46,XX[14]	RUNX1 - 4 copies[90%] RUNX1 - 2 copies[10%] BCR 3copies, ABL1-3copies [73%] BCR 2copies, ABL1-2copies[27%] KMT2A 3copies [70%] KMT2A 2copies [30%]	82	NO MRD	X	Yes	Yes	Yes
57	F	3.1	12900	59,XX,+X,+6,+8,+10,+13,+14,+18,+21,+21,+2mar[1]/46,XX[7]. nuc ish (ETV6 × 1),(RUNX1 × 4)	nuc ish (ETV6 × 1),(RUNX1 × 4)	84	negative	SR	Yes	Yes	No
58	M	2 y 11 m	54900	56~57,XY,+X,+4,+6,+7,+9,+10,+14,+15,+17,+18,+19,+21,+21,+mar[cp4]/46,XY[1]	RUNX1 - 4 copies [67%] RUNX1 - 3 copies [19%] RUNX1 - 2 copies [14%] BCR 2copies, ABL1-2copies [100%] MLL 2 copies [100%]	83	MRD is less than 0.01% (Negative MRD)	IR	No	Yes	No

## Sheet: Sheet2
UPNID	Type	CN State	Chromosome	Cytoband End	Cytoband Start	Gene Count	Size (kbp)	Marker Count	Microarray Nomenclature	Genes	CytoRegions	sno/miRNA	Start Marker	End Marker	Full Location
UPN1	LOH		1	q44	p36.33	2362	248316	60415	arr[hg19] 1p36.33q44(882,802-249,198,692) hmz	NOC2L, KLHL17, PLEKHN1, C1orf170, HES4, ISG15, AGRN, RNF223, C1orf159, LOC254099, MIR200B, MIR200A, MIR429, TTLL10, TNFRSF18, TNFRSF4, SDF4, B3GALT6, FAM132A, UBE2J2, SCNN1D, ACAP3, PUSL1, CPSF3L, GLTPD1, TAS1R3, DVL1, MXRA8, AURKAIP1, CCNL2, LOC148413, MRPL20, ANKRD65, TMEM88B, VWA1, ATAD3C, ATAD3B, ATAD3A, TMEM240, SSU72, C1orf233, MIB2, MMP23B, MMP23A, CDK11B, SLC35E2B, CDK11A, SLC35E2, NADK, …	NOTCH2, CITED4, GLRX2, MPL, CREG1, PRDM16, CKS1B, SMYD3, JAK1, ENAH, TPR, RGS2, SELE, MTOR, ESRRG, NRAS, ATF3, LCK, CD53, TNN, GBP1, ERRFI1, VAV3, IGSF8, BCL2L15, USF1, PRRX1, RSPO1, MLLT11, ARNT, S100A10, RPS27, MAPKAPK2, KCNH1, PRDM2, MTHFR, TSPAN1, B3GALT2, MIB2, CENPF, PDZK1IP1, GPA33, CSF3R, JUN, RAP1GAP, PRDX1, HSPG2, PBX1, ENO1, BCL10, PTCH2, CRTC2, TPM3, SDHB, S100A9, PIK3CD, ABL2, RPL22,…	hsa-mir-200b, hsa-mir-200a, hsa-mir-429, hsa-mir-4251, hsa-mir-551a, hsa-mir-4252, hsa-mir-34a, hsa-mir-1273d, ACA59, hsa-mir-1290, hsa-mir-1256, hsa-mir-4253, hsa-mir-3115, hsa-mir-1976, ACA35, U17a, U17b, HBII-420, ACA61, ACA44, ACA16, U103, U103B, HBII-251, hsa-mir-4254, hsa-mir-552, hsa-mir-4255, ACA55, hsa-mir-30e, hsa-mir-30c-1, U55, U46, U38A, U38B, hsa-mir-761, hsa-mir-3116-1, hsa-mir-311…	S-3WRNV	S-3ZWLD	chr1:882802-249198692
UPN1	Gain	2.89	1	q44	q21.1	1127	103843	103804	arr[hg19] 1q21.1q44(145,382,123-249,224,684)x2-3	LOC100288142, NBPF10, HFE2, TXNIP, POLR3GL, ANKRD34A, LIX1L, RBM8A, GNRHR2, PEX11B, ITGA10, ANKRD35, PIAS3, NUDT17, POLR3C, RNF115, CD160, PDZK1, GPR89A, GPR89C, PDZK1P1, NBPF24, NBPF11, HYDIN2, NBPF12, LOC728989, NBPF13P, PRKAB2, PDIA3P, FMO5, CHD1L, LINC00624, BCL9, ACP6, GJA5, GJA8, GPR89B, NBPF8, MIR5087, FLJ39739, PPIAL4B, PPIAL4A, PPIAL4D, PPIAL4F, NBPF14, NBPF9, NBPF15, NBPF16, PPIAL4E, LO…	GLRX2, CREG1, CKS1B, SMYD3, ENAH, TPR, RGS2, SELE, ESRRG, ATF3, TNN, IGSF8, USF1, PRRX1, MLLT11, ARNT, S100A10, RPS27, MAPKAPK2, KCNH1, B3GALT2, CENPF, GPA33, PBX1, CRTC2, TPM3, S100A9, ABL2, S100A7, TP53BP2, S100A1, DHX9, ECM1, DUSP10, MIXL1, BCL9, PTPN7, ASPM, ARHGEF2, SDHC, FH, ADIPOR1, PIAS3, EGLN1, AKT3, PTPRC, RCSD1, PSEN2, PRCC, PLA2G4A, S100A4, GAS5, PTGS2, TNFSF18, S100A8, S100A13, SMYD2…	hsa-mir-4257, hsa-mir-554, hsa-mir-190b, hsa-mir-4258, hsa-mir-92b, hsa-mir-555, ACA42, ACA26, hsa-mir-9-1, hsa-mir-765, hsa-mir-4259, hsa-mir-556, hsa-mir-921, hsa-mir-1255b-2, hsa-mir-557, hsa-mir-3119-1, hsa-mir-3119-2, hsa-mir-1295, hsa-mir-214, hsa-mir-3120, hsa-mir-199a-2, U81, U47, U80, U79, U78, U44, U77, U76, U75, U74, HBI-100, hsa-mir-488, hsa-mir-3121, hsa-mir-1278, hsa-mir-181b-1, hsa…	S-3EHFD	C-4YYLK	chr1:145382123-249224684
UPN1	LOH		2	q37.3	p25.3	1494	242760	65827	arr[hg19] 2p25.3q37.3(15,702-242,775,910) hmz	FAM110C, SH3YL1, ACP1, FAM150B, TMEM18, LOC339822, SNTG2, TPO, PXDN, MYT1L, LOC730811, TSSC1, TRAPPC12, ADI1, RNASEH1, LOC100506054, RPS7, COLEC11, ALLC, LOC100505964, LOC727982, SOX11, LOC150622, LOC400940, LINC00487, CMPK2, RSAD2, RNF144A-AS1, RNF144A, LOC100506274, LOC339788, LINC00299, ID2, KIDINS220, MBOAT2, ASAP2, ITGB1BP1, CPSF3, IAH1, ADAM17, YWHAQ, TAF1B, GRHL1, KLF11, CYS1, RRM2, C2orf4…	FBXO11, IGK, DIRC3, STRN, FHL2, BCL11A, IL1B, SEPT2, BIRC6, THADA, ZEB2, RHOB, BUB1, BCL2L11, PMS1, MAL, ACVR2A, EML4, SF3B1, MAP2, PDE11A, XPO1, BRE, ADAM17, LHCGR, REL, ALK, AAMP, ATIC, PTMA, BIN1, MIR10B, DNMT3A, LOXL3, INPP5D, DDX1, TGFBRAP1, SDC1, HSPD1, PAX8, CAPG, EPCAM, SOX11, AFF3, RTN4, MSH2, RANBP2, BOK, ATF2, IKZF2, MSH6, HOXD13, CFLAR, DIRC1, BARD1, NLRC4, TMSB10, PAX3, MERTK, ADAM23…	hsa-mir-4261, ACA67B, hsa-mir-548s, hsa-mir-4262, hsa-mir-3125, hsa-mir-1301, hsa-mir-4263, HBII-316, U53, hsa-mir-558, hsa-mir-559, hsa-mir-217, hsa-mir-216a, hsa-mir-216b, U70B, hsa-mir-3126, SNORA36C, hsa-mir-1285-2, hsa-mir-4264, U94, hsa-mir-3127, HBII-289, hsa-mir-4265, hsa-mir-4266, hsa-mir-4267, hsa-mir-1302-3, hsa-mir-663b, hsa-mir-128-1, U70F, hsa-mir-933, hsa-mir-10b, hsa-mir-1246, hsa…	S-3PKEB	S-4FWRM	chr2:15702-242775910
UPN1	Gain	2.92	3	q29	p26.3	1279	197790	178050	arr[hg19] 3p26.3q29(61,891-197,851,986)x2-3	CHL1, CNTN6, CNTN4, CNTN4-AS2, IL5RA, TRNT1, CRBN, LRRN1, SETMAR, SUMF1, ITPR1, EGOT, BHLHE40-AS1, BHLHE40, ARL8B, EDEM1, MIR4790, GRM7, LMCD1-AS1, LMCD1, LINC00312, SSUH2, CAV3, OXTR, RAD18, SRGAP3, SRGAP3-AS3, THUMPD3, SETD5-AS1, SETD5, LHFPL4, MTMR14, CPNE9, BRPF1, OGG1, CAMK1, TADA3, ARPC4, ARPC4-TTLL3, TTLL3, RPUSD3, CIDEC, JAGN1, IL17RE, IL17RC, CRELD1, PRRT3, PRRT3-AS1, EMC3, LOC401052, CI…	LIMD1, HYAL2, PIK3CA, DLG1, RPN1, MUC4, CDC25A, PLD1, MME, MECOM, SEMA3B, RAF1, SATB1, VHL, FANCD2, ROBO1, GATA2, LPP, NCKIPSD, SMARCC1, RASSF1, BTLA, GSK3B, RARRES1, GHRL, PLXNB1, CSTA, MLF1, BCL6, PTPRG, RAP2B, TFG, RBM5, ATR, LRIG1, EDEM1, PPARG, HLTF, FAM107A, SEMA3F, FAIM, TNFSF10, TCTA, HEMK1, CBLB, MUC13, CCR9, WNT5A, CCR2, DIRC2, PLCD1, BAP1, HYAL1, CD200, HSPBAP1, ARL8B, PAK2, RUVBL1, TF…	hsa-mir-378b, hsa-mir-885, ACA7, hsa-mir-4270, hsa-mir-3134, hsa-mir-563, hsa-mir-3135, hsa-mir-466, hsa-mir-128-2, hsa-mir-26a-1, ACA6, E2, hsa-mir-138-1, hsa-mir-564, hsa-mir-1226, hsa-mir-2115, hsa-mir-711, hsa-mir-425, hsa-mir-191, hsa-mir-4271, hsa-mir-566, hsa-let-7g, hsa-mir-135a-1, HBII-108, HBII-108B, HBII-210, hsa-mir-4272, hsa-mir-3136, hsa-mir-1284, hsa-mir-1324, hsa-mir-4273, hsa-mir…	C-4GDNQ	C-4SLRH	chr3:61891-197851986
UPN1	Gain	2.93	4	q35.2	p16.3	891	190889	153163	arr[hg19] 4p16.3q35.2(68,345-190,957,473)x2-3	ZNF595, ZNF718, ZNF876P, ZNF732, ZNF141, ABCA11P, ZNF721, PIGG, PDE6B, ATP5I, MYL5, MFSD7, PCGF3, LOC100129917, CPLX1, GAK, TMEM175, DGKQ, SLC26A1, IDUA, FGFRL1, RNF212, TMED11P, SPON2, LOC100130872, CTBP1, CTBP1-AS2, MAEA, UVSSA, CRIPAK, FAM53A, SLBP, TMEM129, TACC3, FGFR3, LETM1, WHSC1, SCARNA22, NELFA, MIR943, C4orf48, NAT8L, POLN, HAUS3, MXD4, MIR4800, ZFYVE28, LOC402160, RNF4, FAM193A, TNIP2…	MAPK10, AFF1, REST, KIT, FGF2, ING2, WHSC1, NFKB1, FAT1, EIF4E, RHOH, CHIC2, S100P, RASL11B, SYNPO2, MAD2L1, FRYL, RASSF6, NUDT6, FGFR3, HNRNPD, TACC3, FIP1L1, NR3C2, NPY1R, FBXW7, SORBS2, LEF1, AREG, RCHY1, PDGFRA, PTPN13, RAP1GDS1, TET2, SPP1	hsa-mir-571, ACA11, hsa-mir-943, hsa-mir-4274, hsa-mir-95, hsa-mir-548i-2, hsa-mir-3138, hsa-mir-572, hsa-mir-218-1, hsa-mir-573, hsa-mir-4275, hsa-mir-1255b-1, hsa-mir-574, HBI-6, hsa-mir-1269, hsa-mir-575, hsa-mir-1255a, hsa-mir-576, hsa-mir-297, hsa-mir-367, hsa-mir-302d, hsa-mir-302a, hsa-mir-302c, hsa-mir-302b, hsa-mir-1243, hsa-mir-577, hsa-mir-1973, ACA24, hsa-mir-2054, hsa-mir-3139, hsa-m…	C-4FYJV	C-7HDOD	chr4:68345-190957473
UPN1	Gain	2.93	5	q35.3	p15.33	1035	180606	153797	arr[hg19] 5p15.33q35.3(113,576-180,719,789)x2-3	PLEKHG4B, LRRC14B, CCDC127, SDHA, PDCD6, AHRR, C5orf55, EXOC3, PP7080, SLC9A3, MIR4456, LOC100996325, CEP72, TPPP, ZDHHC11, BRD9, TRIP13, LOC100506688, NKD2, SLC12A7, MIR4635, SLC6A19, SLC6A18, TERT, MIR4457, CLPTM1L, SLC6A3, LPCAT1, SDHAP3, LOC728613, MIR4277, MRPL36, NDUFS6, IRX4, IRX2, C5orf38, LOC285577, IRX1, LOC340094, ADAMTS16, KIAA0947, FLJ33360, MED10, UBE2QL1, LOC255167, NSUN2, SRD5A1, …	NR3C1, NPM1, TSLP, CSNK1A1, MSH3, SSBP2, ACSL6, GNB2L1, VCAN, EBF1, ERCC8, PTTG1, DAB2, IRF1, TLX3, EGR1, MAPK9, APC, IL7R, IQGAP2, LIFR, AFF4, FNIP1, MEF2C, GZMA, LOX, NKX2-5, SNX2, ENC1, ARHGAP26, PRLR, CSF1R, PDGFRB, SPINK7, TRIO, CCNB1, TGFBI, NSD1, RANBP17, ITK, PDCD6, SEPP1, IL3, FST, HDAC3, TNIP1	hsa-mir-4277, hsa-mir-4278, SNORD123, hsa-mir-887, hsa-mir-4279, hsa-mir-579, hsa-mir-580, HBII-240, hsa-mir-1274a, hsa-mir-581, hsa-mir-449a, hsa-mir-449b, hsa-mir-449c, hsa-mir-582, HBI-115, U109, hsa-mir-4280, hsa-mir-9-2, hsa-mir-2277, hsa-mir-583, hsa-mir-548p, hsa-mir-548f-3, ACA13, hsa-mir-1244-2, hsa-mir-1289-2, hsa-mir-886, hsa-mir-874, U63, U19, hsa-mir-584, hsa-mir-143, hsa-mir-145, hs…	S-3RLNJ	C-6SEKW	chr5:113576-180719789
UPN1	Gain	3	6	q27	p25.3	1220	170763	155053	arr[hg19] 6p25.3q27(156,974-170,919,482)x3	DUSP22, IRF4, EXOC2, HUS1B, LOC285768, FOXQ1, FOXF2, FOXC1, GMDS, LOC100508120, C6orf195, MYLK4, WRNIP1, SERPINB1, MIR4645, MGC39372, SERPINB9, SERPINB6, DKFZP686I15217, NQO2, HTATSF1P2, RIPK1, BPHL, TUBB2A, LOC100507194, TUBB2B, PSMG4, SLC22A23, PXDC1, FAM50B, PRPF4B, FAM217A, C6orf201, ECI2, CDYL, RPP40, PPP1R3G, LYRM4, MIR3691, FARS2, NRN1, F13A1, LY86-AS1, LY86, RREB1, SSR1, CAGE1, RIOK1, DSP…	MYB, EPHA7, THBS2, LIN28B, E2F3, TFAP2A, TNFAIP3, WISP3, HIST1H3F, PIM1, TNF, BACH2, SESN1, CCNC, ID4, DDX43, CDKN1A, CITED2, DEK, MLLT4, CD109, HIST1H4G, PRDM1, JARID2, IL17A, RNASET2, HMGA1, HFE, SMAP1, IRF4, DDR1, IGF2R, CEP85L, IER3, EEF1A1, POLH, SOX4, ARMC2, LATS1, AHI1, CTGF, RUNX2, AGER, NFKBIE, PPARD, MAPK13, CCND3, FGFR1OP, DAXX, ZFAND3, HIST1H2BH, FANCE, PLAGL1, ECT2L, RNF217-AS1, BCLA…	hsa-mir-548a-1, hsa-mir-3143, U32B, hsa-mir-877, U83, U84, ACA38, U48, U52, hsa-mir-1236, hsa-mir-219-1, hsa-mir-1275, hsa-mir-586, hsa-mir-206, hsa-mir-133b, hsa-mir-548u, hsa-mir-30c-2, hsa-mir-30a, hsa-mir-4282, U50, U50B, hsa-mir-2113, hsa-mir-587, hsa-mir-548b, hsa-mir-3144, hsa-mir-588, U101, HBII-429, ACA33, hsa-mir-548a-2, hsa-mir-3145, hsa-mir-1273c, hsa-mir-1202, ACA20, ACA29, hsa-mir-1…	C-3GOBV	C-5ELRJ	chr6:156974-170919482
UPN1	Gain	2.93	7	q36.3	p22.3	1140	159076	153640	arr[hg19] 7p22.3q36.3(43,360-159,119,707)x2-3	FAM20C, LOC100288524, LOC442497, PDGFA, FLJ44511, PRKAR1B, HEATR2, SUN1, GET4, ADAP1, COX19, CYP2W1, C7orf50, MIR339, GPR146, GPER, ZFAND2A, UNCX, MICALL2, INTS1, MAFK, TMEM184A, PSMG3, PSMG3-AS1, TFAMP1, ELFN1, MAD1L1, MIR4655, FTSJ2, NUDT1, SNX8, EIF3B, CHST12, LFNG, MIR4648, BRAT1, IQCE, TTYH3, AMZ1, GNA12, CARD11, SDK1, FOXK1, AP5Z1, MIR4656, RADIL, PAPOLB, MMD2, RNF216P1, RBAK, RBAK-RBAKDN, …	GPER, RELN, TTC26, NPY, PEX1, HOXA9, SHH, ERVW-1, BRAF, JAZF1, ANLN, EZH2, CAV1, TAC1, BCL7B, CREB3L2, GATAD1, ABCB5, DDC, MUC17, EZH2, IKZF1, HBP1, EZH2, TRB, POM121, POT1, HOXA11, MET, TWIST1, ABCB1, ASNS, ZC3HAV1, SFRP4, NRCAM, SPAM1, LIMK1, GRB10, ACTB, TRIM24, HSPB1, CLDN4, IL6, NRF1, DMTF1, FSCN1, TRG@, HOXA13, HUS1, COL1A2, HGF, POU6F2, STEAP1, PEG10, GPNMB, POM121C, ELN, TRPV6, STEAP2, AU…	hsa-mir-339, hsa-mir-589, hsa-mir-1302-6, hsa-mir-3146, hsa-mir-1183, HBII-336, hsa-mir-148a, hsa-mir-196b, hsa-mir-550-1, hsa-mir-550-2, hsa-mir-548n, hsa-mir-1200, ACA9, ACA5, ACA5c, ACA5b, ACA15, hsa-mir-4283-1, hsa-mir-3147, hsa-mir-4283-2, ACA22, hsa-mir-4284, hsa-mir-590, ACA14a, hsa-mir-1285-1, hsa-mir-653, hsa-mir-489, hsa-mir-591, hsa-mir-25, hsa-mir-93, hsa-mir-106b, hsa-mir-4285, hsa-m…	C-7RSJF	C-7IIDC	chr7:43360-159119707
UPN1	Gain	3	8	q24.3	p23.3	837	146138	125254	arr[hg19] 8p23.3q24.3(158,048-146,295,771)x3	RPL23AP53, ZNF596, FAM87A, FBXO25, TDRP, ERICH1, ERICH1-AS1, LOC286083, DLGAP2, CLN8, MIR596, ARHGEF10, KBTBD11, MYOM2, CSMD1, LOC100287015, MCPH1, ANGPT2, AGPAT5, MIR4659A, MIR4659B, XKR5, LOC100652791, DEFB1, DEFA6, DEFA4, DEFA8P, DEFA9P, DEFA10P, DEFA1, DEFA1B, DEFT1P2, DEFT1P, DEFA3, DEFA11P, DEFA5, LINC00965, FAM66B, DEFB109P1B, USP17L1P, USP17L4, ZNF705G, DEFB4B, DEFB103B, DEFB103A, SPAG11B…	NCOA2, COX6C, KIAA1967, RUNX1T1, CYP7A1, RAD21, CTSB, DLC1, PTK2B, EXT1, ASH2L, TNFRSF11B, NDRG1, WHSC1L1, ADAM9, PTK2, WWP1, TP53INP1, PAG1, RHOBTB2, BOP1, PSCA, NKX3-1, LOXL2, NAT2, MYBL1, MTUS1, KAT6A, SNAI2, EBAG9, WRN, TPD52, NBN, IDO1, FGFR1, GGH, PLAG1, RECQL4, TNKS, MAFA, CLU, NAT1, HAS2, MCPH1, IDO2, PCM1, TACC1, CTHRC1, DEFB1, MYC, TOX, CYP7B1, EIF4EBP1, RNF139, BAALC, ENPP2	hsa-mir-596, hsa-mir-548i-3, hsa-mir-597, hsa-mir-124-1, hsa-mir-4286, hsa-mir-1322, hsa-mir-598, hsa-mir-383, hsa-mir-548v, hsa-mir-320a, hsa-mir-548h-4, hsa-mir-4287, hsa-mir-4288, hsa-mir-3148, U13, hsa-mir-486, U54, hsa-mir-124-2, HBII-276, hsa-mir-2052, hsa-mir-3149, hsa-mir-3150, U72, hsa-mir-599, hsa-mir-875, hsa-mir-1273, hsa-mir-3151, hsa-mir-548a-3, hsa-mir-2053, hsa-mir-548d-1, hsa-mir…	C-5YVTF	C-3WEHE	chr8:158048-146295771
UPN1	Gain	2.91	9	q34.3	p24.3	961	140817	100046	arr[hg19] 9p24.3q34.3(203,861-141,020,389)x2-3	C9orf66, DOCK8, KANK1, DMRT1, DMRT3, DMRT2, SMARCA2, FLJ35024, VLDLR, KCNV2, KIAA0020, RFX3, GLIS3, GLIS3-AS1, SLC1A1, SPATA6L, PPAPDC2, CDC37L1, AK3, RCL1, MIR101-2, JAK2, INSL6, INSL4, RLN2, RLN1, PLGRKT, CD274, PDCD1LG2, KIAA1432, ERMP1, MLANA, KIAA2026, MIR4665, RANBP6, IL33, TPD52L3, UHRF2, GLDC, KDM4C, C9orf123, PTPRD, TYRP1, LURAP1L, MPDZ, FLJ41200, LINC00583, NFIB, ZDHHC21, CER1, FREM1, L…	NR4A3, MIR126, ROR2, TJP2, TXN, TEK, MIR7-1, CKS2, XPA, TOPORS, RLN2, PAX5, HSPA5, BAG1, WNK2, TAL2, IL11RA, MLLT3 (AF9), HNRNPK, MLLT3, JAK2, KDM4C, TNC, IFNA1, STOML2, LPAR1, FNBP1, CNTRL, PPP2R4, NTRK2, NOTCH1, RAPGEF1, FANCG, DAPK1, DAB2IP, SIGMAR1, FANCC, TSC1, SET, FAM22F, ABL1, SEMA4D, KLF4, PTPRD, GNAQ, TNFSF15, PTCH1, FOXE1, ALDOB, SH3GL2, RMRP, CTSL1, CDKN2A, PRRX2, GFI1B, PAEP, CCL27, …	hsa-mir-101-2, hsa-mir-3152, U92, hsa-mir-491, hsa-mir-31, hsa-mir-876, hsa-mir-873, SNORD121B, SNORD121A, hsa-mir-1299, hsa-mir-204, hsa-mir-7-1, hsa-mir-4289, hsa-mir-3153, hsa-mir-4290, SNORA84, hsa-mir-4291, hsa-let-7a-1, hsa-let-7f-1, hsa-let-7d, hsa-mir-2278, hsa-mir-23b, hsa-mir-27b, hsa-mir-3074, hsa-mir-24-1, hsa-mir-1302-8, hsa-mir-32, hsa-mir-455, U70C, hsa-mir-147, HBII-295, hsa-mir-6…	C-6JAPU	C-5LURI	chr9:203861-141020389
UPN1	Gain	4	10	q26.3	p15.3	921	135285	133193	arr[hg19] 10p15.3q26.3(142,391-135,427,143)x4	ZMYND11, DIP2C, MIR5699, PRR26, LARP4B, GTPBP4, IDI2, IDI2-AS1, IDI1, WDR37, LINC00200, ADARB2, ADARB2-AS1, LINC00700, LINC00701, PFKP, PITRM1, PITRM1-AS1, KLF6, LINC00704, LINC00705, AKR1E2, AKR1C6P, AKR1C1, AKR1C2, AKR1C3, AKR1CL1, AKR1C4, UCN3, TUBAL3, NET1, CALML5, CALML3, ASB13, FAM208B, GDI2, ANKRD16, FBXO18, IL15RA, IL2RA, RBM17, PFKFB3, MIR3155A, MIR3155B, LOC399715, PRKCQ, PRKCQ-AS1, LIN…	NET1, SIRT1, PTEN, BAG3, AIFM2, LGI1, CCDC6, MAPK8, PAX2, LOXL4, NCOA4, BLNK, ERCC6, ADD3, FGFR2, ZMIZ1, BNIP3, ABI1, BMI1, HTRA1, PSAP, ALOX5, TLX1, FGF8, EIF3A, ADAM12, BTRC, AKR1C3, RET, KAT6B, NFKB2, DKK1, MRC1, SNCG, LDB1, NT5C2, MXI1, PDCD4, GATA3, RHOBTB1, TET1, MLLT10, ARID5B, KLF6, DMBT1	hsa-mir-3155, hsa-mir-548q, hsa-mir-4293, hsa-mir-1265, hsa-mir-511-1, hsa-mir-511-2, hsa-mir-1915, hsa-mir-603, hsa-mir-604, hsa-mir-938, hsa-mir-3156-1, hsa-mir-4294, hsa-mir-605, hsa-mir-548f-1, hsa-mir-1296, HBII-419, hsa-mir-1254, hsa-mir-606, hsa-mir-346, hsa-mir-107, hsa-mir-3157, hsa-mir-607, hsa-mir-1287, U108, hsa-mir-608, hsa-mir-3158-2, hsa-mir-3158-1, hsa-mir-146b, hsa-mir-1307, hsa-…	C-6UPKW	C-5DPFD	chr10:142391-135427143
UPN1	Gain	3	11	q25	p15.5	1459	134708	136510	arr[hg19] 11p15.5q25(230,615-134,938,470)x3	SIRT3, PSMD13, NLRP6, ATHL1, IFITM5, IFITM2, IFITM1, IFITM3, B4GALNT4, PKP3, SIGIRR, ANO9, PTDSS2, RNH1, HRAS, LRRC56, C11orf35, RASSF7, MIR210HG, MIR210, LOC143666, PHRF1, IRF7, CDHR5, SCT, DRD4, DEAF1, TMEM80, EPS8L2, TALDO1, PDDC1, NS3BP, CEND1, SLC25A22, PIDD, RPLP2, SNORA52, PNPLA2, EFCAB4A, CD151, POLR2L, TSPAN4, CHID1, AP2A2, MUC6, MUC2, MUC5B, TOLLIP, TOLLIP-AS1, BRSK2, MOB2, DUSP8, KRTAP…	NPAT, MLL, LRP5, THRSP, CLP1, EED, DDX10, CD151, ESRRA, CD44, PPP1R14B, RAB39, FLI1, RSF1, MAML2, APLNR, TRPT1, BAD, BIRC2, EXT2, RAG1, STIP1, VEGFB, PTPRJ, C11orf30, DDB2, NUDT22, CST6, MYEOV, HRAS, TAGLN, SDHD, NEU3, CASP1, NNMT, ATM, NUP98, CTNND1, MIR125B1, OPCML, EED, MACROD1, EIF3F, SPI1, FAU, BRMS1, ETS1, LMO2, PICALM, PLCB3, ARHGAP20, ARHGEF12, CD82, INPPL1, SPA17, MEN1, BIRC3, MRE11A, WT…	hsa-mir-210, ACA52, hsa-mir-4298, hsa-mir-675, hsa-mir-483, ACA54, hsa-mir-302e, ACA3, ACA3-2, ACA23, U97, hsa-mir-4299, U14B, U14A, hsa-mir-3159, hsa-mir-610, hsa-mir-670, hsa-mir-129-2, hsa-mir-3160-1, hsa-mir-3160-2, HBII-166, hsa-mir-3161, hsa-mir-130a, hsa-mir-3162, hsa-mir-611, hsa-mir-1908, U99, U22, U31, U30, U29, U28, U27, U26, U25, hsa-mir-1237, hsa-mir-192, hsa-mir-194-2, hsa-mir-612, …	C-4LXKK	S-3EDHX	chr11:230615-134938470
UPN1	Gain	2.89	12	q24.33	p13.33	1184	133604	129778	arr[hg19] 12p13.33q24.33(173,786-133,777,902)x2-3	IQSEC3, LOC574538, SLC6A12, SLC6A13, KDM5A, CCDC77, B4GALNT3, NINJ2, WNK1, RAD52, ERC1, LINC00942, FBXL14, WNT5B, MIR3649, ADIPOR2, CACNA2D4, LRTM2, LINC00940, DCP1B, CACNA1C, CACNA1C-AS4, CACNA1C-IT3, CACNA1C-AS1, LOC283440, FKBP4, ITFG2, NRIP2, LOC100507424, FOXM1, RHNO1, TULP3, TEAD4, TSPAN9, PRMT8, EFCAB4B, PARP11, CCND2, C12orf5, FGF23, FGF6, C12orf4, RAD51AP1, DYRK4, AKAP3, NDUFA9, GALNT8, …	SOCS2, KLRK1, RAP1B, APAF1, MDM2, PPFIBP1, PAWR, ZNF384, BCL2L14, IL23A, ATF1, HOXC11, RAN, HNRNPA1 , FOXM1, HRK, GUCY2C, PTPN11, EPS8, ERC1, SLC5A8, CD9, CHFR, RECQL, SOX5, SH2B3, BTG1, HOXC13, FBRSL1, ETV6, ATF7IP, TRIAP1, CCND2, P2RX7, KITLG, PXN, AGAP2, DRAM1, KDM5A, IL22, PA2G4, CDKN1B, PTHLH, ALDH2, GABARAPL1, ETNK1, SARNP, PRKAB1, DUSP6, TSPAN8, EP400, METAP2, ELK3, SMARCC2, DDIT3, DENR, U…	U85, ACA57, hsa-mir-200c, hsa-mir-141, U89, hsa-mir-1244-3, hsa-mir-613, hsa-mir-614, hsa-mir-920, hsa-mir-4302, ACA34, hsa-mir-1291, ACA2a, ACA2b, hsa-mir-1293, hsa-mir-196a-2, hsa-mir-615, hsa-mir-148b, U59B, U59A, hsa-mir-1228, hsa-mir-616, hsa-mir-26a-2, hsa-let-7i, hsa-mir-548c, U70G, hsa-mir-1279, hsa-mir-1252, hsa-mir-617, hsa-mir-618, hsa-mir-492, hsa-mir-331, hsa-mir-1251, hsa-mir-135a-2…	C-3JQGZ	C-7PNZW	chr12:173786-133777902
UPN1	Gain	4	14	q32.33	q11.2	770	86773.8	85690	arr[hg19] 14q11.2q32.33(20,511,672-107,285,437)x4	OR4L1, OR4K17, OR4N5, OR11G2, OR11H6, OR11H4, TTC5, CCNB1IP1, SNORD126, RPPH1, PARP2, TEP1, KLHL33, OSGEP, APEX1, TMEM55B, PNP, RNASE10, RNASE9, RNASE11, RNASE12, OR6S1, ANG, RNASE4, EDDM3A, EDDM3B, RNASE6, RNASE1, RNASE3, ECRP, RNASE2, METTL17, SLC39A2, NDRG2, TPPP2, RNASE13, RNASE7, RNASE8, ARHGEF40, ZNF219, TMEM253, OR5AU1, LINC00641, HNRNPC, RPGRIP1, SUPT16H, CHD8, SNORD9, SNORD8, RAB2B, TOX4…	MEG3, FUT8, IGH@, TCL6, XRCC3, PRKD1, TSHR, SAV1, ANG, NDRG2, TRAF3, SIX1, EML1, TRIP11, NKX2-1, OTX2, PTPN21, TRA@, PAX9, SEL1L, NUMB, DPF3, FOXA1, GPHN, MTA1, DIO2, GPR68, TCL1A, ZFP36L1, BCL11B, TRD@, TRD, STRN3, TRA, ESR2, NIN, AKT1, MMP14, TCL1B, LGALS3, JAG2, VRK1, IGH	hsa-mir-1201, SNORD126, mgU6-53B, mgU6-53, hsa-mir-208a, hsa-mir-208b, hsa-mir-4307, hsa-mir-3171, hsa-mir-624, hsa-mir-3172, SNORD127, hsa-mir-4308, hsa-mir-548h-1, hsa-mir-625, hsa-mir-1260, ACA65, SNORA11B, hsa-mir-3173, U93, hsa-mir-342, hsa-mir-345, hsa-mir-770, hsa-mir-493, hsa-mir-337, hsa-mir-665, hsa-mir-431, hsa-mir-433, hsa-mir-127, hsa-mir-432, hsa-mir-136, 14q(0), hsa-mir-370, 14q(I-…	S-4ETOO	S-3HXYB	chr14:20511672-107285437
UPN1	Gain	3	16	q24.3	p13.3	955	90069.2	72814	arr[hg19] 16p13.3q24.3(85,880-90,155,062)x3	POLR3K, SNRNP25, RHBDF1, MPG, NPRL3, HBZ, HBM, HBA2, HBA1, HBQ1, LUC7L, ITFG3, RGS11, ARHGDIG, PDIA2, AXIN1, MRPL28, TMEM8A, LOC100134368, NME4, DECR2, RAB11FIP3, LINC00235, SOLH, MIR5587, MIR3176, C16orf11, NHLRC4, PIGQ, RAB40C, WFIKKN1, C16orf13, FAM195A, WDR90, RHOT2, RHBDL1, STUB1, JMJD8, WDR24, FBXL16, METRN, FAM173A, CCDC78, HAGHL, NARFL, MSLN, MIR662, RPUSD1, CHTF18, GNG13, PRR25, LMF1, SO…	TSC2, AXIN1, PLK1, MMP2, TSNAXIP1, CIITA, CDH13, FAM65A, WWOX, CYLD, RBL2, CBFB, ZFHX3, MVP, ACD, CENPT, CREBBP, MAPK3, EIF3C, CDH1, TERF2, CDT1, AMFR, FBXO31, NQO1, WFDC1, PKD1, GFOD2, PHLPP2, IL21R, RANBP10, CBFA2T3, RLTPR, FANCA, SOCS1, ERCC4, ABCC1, MYH11, TRAP1, MAF, USP7, CTCF, FUS, NOL3	hsa-mir-3176, hsa-mir-662, hsa-mir-3177, ACA10, U64, ACA64, hsa-mir-1225, U60, hsa-mir-940, hsa-mir-3178, hsa-mir-548h-2, hsa-mir-193b, hsa-mir-365-1, hsa-mir-3179-1, hsa-mir-3180-1, hsa-mir-1972-1, hsa-mir-484, hsa-mir-3179-2, hsa-mir-3180-2, hsa-mir-3180-3, hsa-mir-3179-3, hsa-mir-548w, ACA30, hsa-mir-762, hsa-mir-1826, hsa-mir-3181, hsa-mir-138-2, ACA46, ACA50, hsa-mir-328, hsa-mir-1538, hsa-m…	C-4GBFR	C-7EGZY	chr16:85880-90155062
UPN1	Gain	2.91	17	q25.3	p13.3	1373	81041.4	73347	arr[hg19] 17p13.3q25.3(525-81,041,938)x2-3	DOC2B, RPH3AL, LOC100506388, C17orf97, FAM101B, VPS53, FAM57A, GEMIN4, DBIL5P, GLOD4, RNMTL1, NXN, TIMM22, ABR, MIR3183, BHLHA9, TUSC5, YWHAE, CRK, MYO1C, INPP5K, PITPNA-AS1, PITPNA, SLC43A2, SCARF1, RILP, PRPF8, TLCD2, MIR22HG, MIR22, WDR81, SERPINF2, SERPINF1, SMYD4, RPA1, RTN4RL1, DPH1, OVCA2, MIR132, MIR212, HIC1, SMG6, SRR, TSR1, SNORD91B, SNORD91A, SGSM2, MNT, LOC284009, METTL16, PAFAH1B1, …	CLDN7, TBX2, PRKAR1A, TIMP2, KDM6B, AATF, KSR1, SLC9A3R1, FAM57A, WRAP53, GAS7, GRB2, TRIM37, SRSF2, RECQL5, GRN, NMT1, STAT3, SUZ12, HIC1, ALOX12, ELAC2, PPP1R1B, BCAS3, PYY, LASP1, ENPP7, XAF1, DDX5, RABEP1, MIR21, RARA, SHBG, CRLF3, CDC6, RAC3, STARD3, STAT5B, SLC16A3, TRAF4, NCOR1, COL1A1, TRPV1, GAST, SPECC1, ASPSCR1, TP53, ST6GALNAC1, DLX4, ETV4, SLC4A1, HLF, PER1, NF1, BRCA1, TAF15, PPM1D,…	hsa-mir-3183, hsa-mir-22, hsa-mir-132, hsa-mir-212, HBII-296B, HBII-296A, hsa-mir-1253, hsa-mir-195, hsa-mir-497, hsa-mir-324, ACA48, mgU6-77, U67, ACA68, hsa-mir-4314, U8, hsa-mir-744, hsa-mir-548h-3, hsa-mir-1288, U49B, U49A, HBII-135, hsa-mir-33b, U3-2, U3-2B, U3-4, U3, U3-3, hsa-mir-1180, ACA59B, U42B, mgh18S-121, U42A, Z17B, hsa-mir-451, hsa-mir-144, hsa-mir-423, hsa-mir-3184, hsa-mir-193a, …	C-5VAZU	S-4LRWR	chr17:525-81041938
UPN1	Gain	4	18	q23	p11.32	342	77877.9	66936	arr[hg19] 18p11.32q23(136,226-78,014,123)x4	USP14, THOC1, COLEC12, CETN1, CLUL1, C18orf56, TYMS, ENOSF1, YES1, ADCYAP1, LINC00470, METTL4, NDC80, CBX3P2, SMCHD1, EMILIN2, LPIN2, LOC727896, MYOM1, MYL12A, MYL12B, TGIF1, DLGAP1, DLGAP1-AS1, DLGAP1-AS3, DLGAP1-AS4, DLGAP1-AS5, C18orf42, LINC00526, LINC00667, ZBTB14, EPB41L3, LOC645355, MIR3976, TMEM200C, L3MBTL4, MIR4317, LOC100130480, ARHGAP28, LINC00668, LAMA1, LRRC30, PTPRM, LOC100192426, …	EPB41L3, SMAD4, SETBP1, SS18, DSG2, SERPINB5, SMAD2, PTPN2, DCC, GATA6, ZNF521, MALT1, SLC39A6, RBBP8, MAPK4, MBD2, BCL2, PHLPP1	hsa-mir-4317, hsa-mir-3156-2, hsa-mir-320c-1, hsa-mir-133a-1, hsa-mir-1-2, hsa-mir-320c-2, hsa-mir-302f, hsa-mir-187, hsa-mir-4318, hsa-mir-924, hsa-mir-4319, hsa-mir-1539, U58C, U58A, U58B, mgU12-22/U4-8, U91, hsa-mir-4320, ACA37, hsa-mir-122	C-7KBTZ	C-6HGFA	chr18:136226-78014123
UPN1	Gain	3	19	q13.43	q13.33	482	10396.4	10063	arr[hg19] 19q13.33q13.43(48,560,449-58,956,888)x3	PLA2G4C, LIG1, CARD8, LOC100505812, ZNF114, CCDC114, EMP3, TMEM143, SYNGR4, KDELR1, GRIN2D, GRWD1, KCNJ14, CYTH2, LMTK3, SULT2B1, FAM83E, SPACA4, RPL18, SPHK2, DBP, CA11, SEC1P, NTN5, FUT2, MAMSTR, RASIP1, IZUMO1, FUT1, FGF21, BCAT2, HSD17B14, PLEKHA4, PPP1R15A, TULP2, NUCB1, DHDH, BAX, FTL, GYS1, RUVBL2, LHB, LOC101059948, CGB, SNAR-G2, CGB2, CGB1, SNAR-G1, CGB5, CGB8, CGB7, NTF4, KCNA7, SNRNP70…	KLK7, RUVBL2, MIR125A, SCAF1, CARD8, ATF5, CNOT3, BCL2L12, BAX, PEG3, KLK5, KLK10, TFPT, KLK11, KLK4	hsa-mir-220c, hsa-mir-4324, U32A, U33, U34, U35A, U35B, hsa-mir-150, HBII-180B, HBII-180A, HBII-180C, hsa-mir-99b, hsa-let-7e, hsa-mir-125a, hsa-mir-643, hsa-mir-512-1, hsa-mir-512-2, hsa-mir-1323, hsa-mir-498, hsa-mir-520e, hsa-mir-515-1, hsa-mir-519e, hsa-mir-520f, hsa-mir-515-2, hsa-mir-519c, hsa-mir-1283-1, hsa-mir-520a, hsa-mir-526b, hsa-mir-519b, hsa-mir-525, hsa-mir-523, hsa-mir-518f, hsa-…	C-6TGQW	S-3DOIG	chr19:48560449-58956888
UPN1	Gain	4	21	q22.3	q11.2	293	33090.9	33620	arr[hg19] 21q11.2q22.3(15,006,457-48,097,372)x4	POTED, C21orf15, ANKRD20A11P, LIPI, RBM11, ABCC13, HSPA13, SAMSN1, SAMSN1-AS1, LOC388813, NRIP1, USP25, LINC00478, MIR99A, MIRLET7C, MIR125B2, C21orf37, CXADR, BTG3, C21orf91-OT1, C21orf91, CHODL-AS1, CHODL, TMPRSS15, LINC00320, NCAM2, RNU6-67P, LINC00317, LINC00308, D21S2088E, LOC339622, LINC00158, MIR155HG, MIR155, LINC00515, MRPL39, JAM2, ATP5J, GABPA, APP, CYYR1, ADAMTS1, ADAMTS5, MIR4759, MI…	ERG, TFF3, U2AF1, OLIG2, PTTG1IP, DYRK1A, TMPRSS2, TIAM1, CSTB, ADAMTS1, RUNX1, ETS2, TMPRSS3, S100B, NRIP1, MIR125B2, TFF2, TFF1	hsa-mir-3118-5, hsa-mir-99a, hsa-let-7c, hsa-mir-125b-2, hsa-mir-548x, hsa-mir-155, hsa-mir-4327, ACA67, hsa-mir-802, hsa-mir-3197	C-6OPRF	C-3ELOA	chr21:15006457-48097372
UPN1	Gain	2.83	22	q13.33	q11.1	544	34308.9	38296	arr[hg19] 22q11.1q13.33(16,888,899-51,197,838)x2-3	CCT8L2, TPTEP1, ANKRD62P1-PARP4P3, XKR3, HSFY1P1, GAB4, CECR7, IL17RA, CECR6, CECR5, CECR5-AS1, CECR1, CECR3, CECR2, SLC25A18, ATP6V1E1, BCL2L13, BID, MIR3198-1, LINC00528, MICAL3, MIR648, FLJ41941, PEX26, TUBA8, USP18, GGT3P, DGCR6, PRODH, DGCR5, DGCR9, DGCR10, DGCR2, DGCR11, DGCR14, TSSK2, GSC2, SLC25A1, CLTCL1, HIRA, MRPL40, C22orf39, UFD1L, CDC45, CLDN5, LINC00895, SEPT5, SEPT5-GP1BB, GP1BB, …	VPREB1, PDGFB, SMARCB1, RAC2, MKL1, BRD1, IL2RB, BCR, MCM5, XRCC6, SOX10, IGL@, TYMP, MN1, CLTCL1, RBX1, ATF4, EP300, SEPT5, MMP11, IGLL1, Sep.05, CHEK2, PARVB, MAPK12, MYH9, MIF, EWSR1, NF2, MAPK1, FBLN1	hsa-mir-3198, hsa-mir-648, hsa-mir-185, hsa-mir-1306, hsa-mir-1286, hsa-mir-649, hsa-mir-301b, hsa-mir-130b, hsa-mir-650, hsa-mir-548j, hsa-mir-3199-1, hsa-mir-3199-2, SNORD125, hsa-mir-3200, hsa-mir-658, hsa-mir-659, U83B, U83A, U43, hsa-mir-1281, hsa-mir-33a, hsa-mir-1249, hsa-let-7a-3, hsa-let-7b, hsa-mir-3201	S-3RTNJ	C-4WMOA	chr22:16888899-51197838
UPN1	GainMosaic	2.79836	X	p22.33	p22.33	24	2661.32	4273	arr[hg19] Xp22.33(168,546-2,829,864)x2-3	PLCXD1, GTPBP6, LINC00685, PPP2R3B, SHOX, CRLF2, CSF2RA, MIR3690, IL3RA, SLC25A6, ASMTL-AS1, ASMTL, P2RY8, AKAP17A, ASMT, DHRSX, ZBED1, CD99P1, LINC00102, CD99, XG, XGPY2, GYG2, ARSD	CRLF2, IL3RA, P2RY8		C-5QGHR	C-3UEXX	chrX:168546-2829864
UPN1	Gain	2	X	q28	p22.33	1020	155064	189794	arr[hg19] Xp22.33q28(169,921-155,233,731)x2	PLCXD1, GTPBP6, LINC00685, PPP2R3B, SHOX, CRLF2, CSF2RA, MIR3690, IL3RA, SLC25A6, ASMTL-AS1, ASMTL, P2RY8, AKAP17A, ASMT, DHRSX, ZBED1, CD99P1, LINC00102, CD99, XG, XGPY2, GYG2, ARSD, ARSE, ARSH, ARSF, CXorf28, MXRA5, PRKX, LOC389906, NLGN4X, MIR4770, VCX3A, HDHD1, MIR4767, STS, VCX, PNPLA4, MIR651, VCX2, VCX3B, KAL1, FAM9A, FAM9B, TBL1X, GPR143, SHROOM2, LOC100288814, WWC3, CLCN4, MID1, HCCS, AR…	REPS2, CRLF2, SSX2, Sep.06, GPC3, CXCR3, BRWD3, STAG2, AMOT, MIR221, ELF4, L1CAM, ARMCX3, FOXO4, BTK, FAM123B, TFE3, ARMCX2, MIR222, MTCP1, RPL10, AIFM1, ARMCX1, FOXP3, GATA1, DACH2, DKC1, IL3RA, RHOXF2, MSN, KDM6A, SEPT6, SPANXA1, PHF6, NONO, RBBP7, BCOR, P2RY8, ZBTB33, ZRSR2, AR	hsa-mir-651, hsa-mir-1308, ACA12, hsa-mir-548f-5, hsa-mir-221, hsa-mir-222, SNORA11C, hsa-mir-532, hsa-mir-188, hsa-mir-500, hsa-mir-362, hsa-mir-501, hsa-mir-500b, hsa-mir-660, hsa-mir-502, SNORA11E, SNORA11D, hsa-mir-98, hsa-let-7f-2, U107, hsa-mir-1468, hsa-mir-223, hsa-mir-421, hsa-mir-374b, hsa-mir-545, hsa-mir-374a, hsa-mir-384, hsa-mir-325, hsa-mir-4328, hsa-mir-548i-4, hsa-mir-1321, hsa-m…	S-4SFNT	C-6KTXX	chrX:169921-155233731
UPN2	Gain	2.77	4	q21.22	p16.3	454	82618.1	65876	arr[hg19] 4p16.3q21.22(68,345-82,686,460)x2-3	ZNF595, ZNF718, ZNF876P, ZNF732, ZNF141, ABCA11P, ZNF721, PIGG, PDE6B, ATP5I, MYL5, MFSD7, PCGF3, LOC100129917, CPLX1, GAK, TMEM175, DGKQ, SLC26A1, IDUA, FGFRL1, RNF212, TMED11P, SPON2, LOC100130872, CTBP1, CTBP1-AS2, MAEA, UVSSA, CRIPAK, FAM53A, SLBP, TMEM129, TACC3, FGFR3, LETM1, WHSC1, SCARNA22, NELFA, MIR943, C4orf48, NAT8L, POLN, HAUS3, MXD4, MIR4800, ZFYVE28, LOC402160, RNF4, FAM193A, TNIP2…	RASL11B, CHIC2, TACC3, FGFR3, RHOH, RASSF6, WHSC1, PDGFRA, AREG, KIT, FRYL, S100P, FIP1L1, REST, RCHY1	hsa-mir-571, ACA11, hsa-mir-943, hsa-mir-4274, hsa-mir-95, hsa-mir-548i-2, hsa-mir-3138, hsa-mir-572, hsa-mir-218-1, hsa-mir-573, hsa-mir-4275, hsa-mir-1255b-1, hsa-mir-574, HBI-6, hsa-mir-1269	C-4FYJV	C-5ACUL	chr4:68345-82686460
UPN2	Gain	2.76	4	q35.2	q24	327	84476.9	66270	arr[hg19] 4q24q35.2(106,480,584-190,957,473)x2-3	ARHGEF38, ARHGEF38-IT1, INTS12, GSTCD, NPNT, TBCK, AIMP1, GIMD1, DKK2, PAPSS1, SGMS2, CYP2U1, HADH, LEF1, LEF1-AS1, RPL34-AS1, RPL34, OSTC, ETNPPL, COL25A1, SEC24B-AS1, SEC24B, CCDC109B, CASP6, PLA2G12A, CFI, GAR1, RRH, LRIT3, EGF, ELOVL6, ENPEP, PITX2, C4orf32, AP1AR, TIFA, ALPK1, NEUROG2, C4orf21, LARP7, MIR367, MIR302D, MIR302A, MIR302C, MIR302B, ANK2, MIR1243, CAMK2D, ARSJ, UGT8, MIR577, NDST…	NR3C2, SYNPO2, FBXW7, FGF2, LEF1, NUDT6, SORBS2, NPY1R, FAT1, ING2, MAD2L1	hsa-mir-576, hsa-mir-297, hsa-mir-367, hsa-mir-302d, hsa-mir-302a, hsa-mir-302c, hsa-mir-302b, hsa-mir-1243, hsa-mir-577, hsa-mir-1973, ACA24, hsa-mir-2054, hsa-mir-3139, hsa-mir-548g, U73b, U73a, hsa-mir-3140, hsa-mir-578, hsa-mir-1979, hsa-mir-548t, hsa-mir-4276, hsa-mir-1305	C-4WYUN	C-7HDOD	chr4:106480584-190957473
UPN2	Gain	2.83	5	q35.3	p15.33	1035	180606	153797	arr[hg19] 5p15.33q35.3(113,576-180,719,789)x2-3	PLEKHG4B, LRRC14B, CCDC127, SDHA, PDCD6, AHRR, C5orf55, EXOC3, PP7080, SLC9A3, MIR4456, LOC100996325, CEP72, TPPP, ZDHHC11, BRD9, TRIP13, LOC100506688, NKD2, SLC12A7, MIR4635, SLC6A19, SLC6A18, TERT, MIR4457, CLPTM1L, SLC6A3, LPCAT1, SDHAP3, LOC728613, MIR4277, MRPL36, NDUFS6, IRX4, IRX2, C5orf38, LOC285577, IRX1, LOC340094, ADAMTS16, KIAA0947, FLJ33360, MED10, UBE2QL1, LOC255167, NSUN2, SRD5A1, …	CCNB1, FNIP1, GNB2L1, AFF4, EGR1, TNIP1, EBF1, APC, IL3, DAB2, NSD1, ENC1, ARHGAP26, SPINK7, TRIO, ITK, PRLR, NR3C1, CSF1R, TSLP, ACSL6, MAPK9, PTTG1, IRF1, NKX2-5, RANBP17, IL7R, GZMA, PDGFRB, SEPP1, PDCD6, FST, SNX2, TLX3, MSH3, NPM1, SSBP2, CSNK1A1, HDAC3, LIFR, IQGAP2, ERCC8, VCAN, MEF2C, LOX, TGFBI	hsa-mir-4277, hsa-mir-4278, SNORD123, hsa-mir-887, hsa-mir-4279, hsa-mir-579, hsa-mir-580, HBII-240, hsa-mir-1274a, hsa-mir-581, hsa-mir-449a, hsa-mir-449b, hsa-mir-449c, hsa-mir-582, HBI-115, U109, hsa-mir-4280, hsa-mir-9-2, hsa-mir-2277, hsa-mir-583, hsa-mir-548p, hsa-mir-548f-3, ACA13, hsa-mir-1244-2, hsa-mir-1289-2, hsa-mir-886, hsa-mir-874, U63, U19, hsa-mir-584, hsa-mir-143, hsa-mir-145, hs…	S-3RLNJ	C-6SEKW	chr5:113576-180719789
UPN2	Gain	2.8	6	q27	p25.3	1220	170763	155053	arr[hg19] 6p25.3q27(156,974-170,919,482)x2-3	DUSP22, IRF4, EXOC2, HUS1B, LOC285768, FOXQ1, FOXF2, FOXC1, GMDS, LOC100508120, C6orf195, MYLK4, WRNIP1, SERPINB1, MIR4645, MGC39372, SERPINB9, SERPINB6, DKFZP686I15217, NQO2, HTATSF1P2, RIPK1, BPHL, TUBB2A, LOC100507194, TUBB2B, PSMG4, SLC22A23, PXDC1, FAM50B, PRPF4B, FAM217A, C6orf201, ECI2, CDYL, RPP40, PPP1R3G, LYRM4, MIR3691, FARS2, NRN1, F13A1, LY86-AS1, LY86, RREB1, SSR1, CAGE1, RIOK1, DSP…	HIST1H4F, PPARD, TFAP2A, IRF4, IGF2R, CD109, LIN28B, EPHA7, CEP85L, DDX43, HIST1H3F, POLH, hsa-mir-548a-2, ID4, ZFAND3, HMGA1, CDKN1A, HFE, EEF1A1, BACH2, JARID2, CTGF, MLLT4, DAXX, BAK1, AGER, CCNC, THBS2, MYB, CASP8AP2 , CITED2, DEK, CAGE1, RUNX2, NFKBIE, SESN1, MAPK13, FOXO3, RNASET2, FGFR1OP, TFEB, WISP3, IER3, LATS1, TNF, AHI1, HIST1H4G, ARMC2, CCND3, MAP3K7, SOX4, HDAC2, E2F3, PLAGL1, ECT2L…	hsa-mir-548a-1, hsa-mir-3143, U32B, hsa-mir-877, U83, U84, ACA38, U48, U52, hsa-mir-1236, hsa-mir-219-1, hsa-mir-1275, hsa-mir-586, hsa-mir-206, hsa-mir-133b, hsa-mir-548u, hsa-mir-30c-2, hsa-mir-30a, hsa-mir-4282, U50, U50B, hsa-mir-2113, hsa-mir-587, hsa-mir-548b, hsa-mir-3144, hsa-mir-588, U101, HBII-429, ACA33, hsa-mir-548a-2, hsa-mir-3145, hsa-mir-1273c, hsa-mir-1202, ACA20, ACA29, hsa-mir-1…	C-3GOBV	C-5ELRJ	chr6:156974-170919482
UPN2	Gain	2.9	8	q24.3	p23.3	837	146138	125254	arr[hg19] 8p23.3q24.3(158,048-146,295,771)x2-3	RPL23AP53, ZNF596, FAM87A, FBXO25, TDRP, ERICH1, ERICH1-AS1, LOC286083, DLGAP2, CLN8, MIR596, ARHGEF10, KBTBD11, MYOM2, CSMD1, LOC100287015, MCPH1, ANGPT2, AGPAT5, MIR4659A, MIR4659B, XKR5, LOC100652791, DEFB1, DEFA6, DEFA4, DEFA8P, DEFA9P, DEFA10P, DEFA1B, DEFA1, DEFT1P2, DEFT1P, DEFA3, DEFA11P, DEFA5, LINC00965, FAM66B, DEFB109P1B, USP17L1P, USP17L4, ZNF705G, DEFB4B, DEFB103B, DEFB103A, SPAG11B…	PLAG1, ENPP2, KAT6A, CTHRC1, SNAI2, MCPH1, NAT2, TACC1, BAALC, CYP7A1, CLU, MYBL1, NKX3-1, RUNX1T1, IDO1, CYP7B1, CTSB, NCOA2, RECQL4, RHOBTB2, RAD21, BOP1, COX6C, TP53INP1, NAT1, TOX, EIF4EBP1, GGH, EXT1, DEFB1, PTK2B, TPD52, KIAA1967, IDO2, WHSC1L1, WWP1, MYC, PAG1, FGFR1, PCM1, PTK2, NDRG1, DLC1, PSCA, LOXL2, ADAM9, ASH2L, RNF139, MTUS1, NBN, HAS2, MAFA, TNKS, WRN, TNFRSF11B, EBAG9	hsa-mir-596, hsa-mir-548i-3, hsa-mir-597, hsa-mir-124-1, hsa-mir-4286, hsa-mir-1322, hsa-mir-598, hsa-mir-383, hsa-mir-548v, hsa-mir-320a, hsa-mir-548h-4, hsa-mir-4287, hsa-mir-4288, hsa-mir-3148, U13, hsa-mir-486, U54, hsa-mir-124-2, HBII-276, hsa-mir-2052, hsa-mir-3149, hsa-mir-3150, U72, hsa-mir-599, hsa-mir-875, hsa-mir-1273, hsa-mir-3151, hsa-mir-548a-3, hsa-mir-2053, hsa-mir-548d-1, hsa-mir…	C-5YVTF	C-3WEHE	chr8:158048-146295771
UPN2	LOH		10	q11.23	q11.22	36	3809.86	331	arr[hg19] 10q11.22q11.23(46,143,620-49,953,475) hmz	ZFAND4, FAM21C, AGAP4, PTPN20B, PTPN20A, BMS1P1, BMS1P5, GLUD1P7, FAM35BP, SYT15, GPRIN2, NPY4R, LINC00842, HNRNPA1P33, ANXA8, ANXA8L1, FAM25C, FAM25G, FAM25B, AGAP9, BMS1P2, BMS1P6, FAM35DP, ANXA8L2, FAM21B, CTSL1P2, ZNF488, RBP3, GDF2, GDF10, FRMPD2P1, LOC399753, FRMPD2, MAPK8, ARHGAP22, WDFY4	MAPK8		S-4JVTM	S-4RYJU	chr10:46143620-49953475
UPN2	LOH		12	p11.1	p13.33	335	34669.5	9364	arr[hg19] 12p13.33p11.1(166,332-34,835,837) hmz	IQSEC3, LOC574538, SLC6A12, SLC6A13, KDM5A, CCDC77, B4GALNT3, NINJ2, WNK1, RAD52, ERC1, LINC00942, FBXL14, WNT5B, MIR3649, ADIPOR2, CACNA2D4, LRTM2, LINC00940, DCP1B, CACNA1C, CACNA1C-AS4, CACNA1C-IT3, CACNA1C-AS1, LOC283440, FKBP4, ITFG2, NRIP2, LOC100507424, FOXM1, RHNO1, TULP3, TEAD4, TSPAN9, PRMT8, EFCAB4B, PARP11, CCND2, C12orf5, FGF23, FGF6, C12orf4, RAD51AP1, DYRK4, AKAP3, NDUFA9, GALNT8, …	CDKN1B, GUCY2C, KLRK1, KDM5A, GABARAPL1, CD9, CCND2, RECQL, VWF, FOXM1, ETNK1, PPFIBP1, PTHLH, SOX5, MIR200C, ATF7IP, ERC1, EPS8, BCL2L14, ING4, ETV6, KRAS, ZNF384	U85, ACA57, hsa-mir-200c, hsa-mir-141, U89, hsa-mir-1244-3, hsa-mir-613, hsa-mir-614, hsa-mir-920, hsa-mir-4302	S-3WBKX	S-3UPBP	chr12:166332-34835837
UPN2	LOH		12	q24.33	q11	849	95920.4	24060	arr[hg19] 12q11q24.33(37,857,750-133,778,166) hmz	ALG10B, CPNE8, KIF21A, ABCD2, C12orf40, SLC2A13, LRRK2, CNTN1, PDZRN4, GXYLT1, YAF2, ZCRB1, PPHLN1, PRICKLE1, ADAMTS20, PUS7L, IRAK4, TWF1, TMEM117, NELL2, DBX2, RACGAP1P, PLEKHA8P1, RNY5, ANO6, LINC00938, ARID2, SCAF11, SLC38A1, SLC38A2, SLC38A4, AMIGO2, MIR4698, PCED1B-AS1, PCED1B, RPAP3, ENDOU, RAPGEF3, SLC48A1, HDAC7, VDR, TMEM106C, COL2A1, SENP1, PFKM, ASB8, C12orf68, OR10AD1, H1FNT, ZNF641,…	DENR, SOCS2, ALDH2, IL22, MDM2, HRK, CDK4, RAP1B, AGAP2, HNRNPA1 , METAP2, GLI1, PTPN11, IL23A, KITLG, SARNP, BTG1, DDIT3, ELK3, ATF1, DRAM1, PXN, FBRSL1, SMARCC2, DUSP6, USP15, TRIAP1, ASCL1, PEBP1, SLC5A8, PRKAB1, HOXC11, SH2B3, TSPAN8, RAN, CHFR, PA2G4, APAF1, EP400, P2RX7, HOXC13, PAWR, HMGA2	ACA34, hsa-mir-1291, ACA2a, ACA2b, hsa-mir-1293, hsa-mir-196a-2, hsa-mir-615, hsa-mir-148b, U59B, U59A, hsa-mir-1228, hsa-mir-616, hsa-mir-26a-2, hsa-let-7i, hsa-mir-548c, U70G, hsa-mir-1279, hsa-mir-1252, hsa-mir-617, hsa-mir-618, hsa-mir-492, hsa-mir-331, hsa-mir-1251, hsa-mir-135a-2, hsa-mir-4303, ACA53, hsa-mir-1827, hsa-mir-619, hsa-mir-1302-1, hsa-mir-620, hsa-mir-1178, hsa-mir-4304, ACA49	S-4RJFC	S-4NRKL	chr12:37857750-133778166
UPN2	Gain	4	14	q32.33	q11.2	770	86773.8	85690	arr[hg19] 14q11.2q32.33(20,511,672-107,285,437)x4	OR4L1, OR4K17, OR4N5, OR11G2, OR11H6, OR11H4, TTC5, CCNB1IP1, SNORD126, RPPH1, PARP2, TEP1, KLHL33, OSGEP, APEX1, TMEM55B, PNP, RNASE10, RNASE9, RNASE11, RNASE12, OR6S1, ANG, RNASE4, EDDM3A, EDDM3B, RNASE6, RNASE1, RNASE3, ECRP, RNASE2, METTL17, SLC39A2, NDRG2, TPPP2, RNASE13, RNASE7, RNASE8, ARHGEF40, ZNF219, TMEM253, OR5AU1, LINC00641, HNRNPC, RPGRIP1, SUPT16H, CHD8, SNORD9, SNORD8, RAB2B, TOX4…	TRIP11, NKX2-1, TCL6, VRK1, MTA1, PRKD1, SAV1, JAG2, ESR2, BCL11B, GPHN, AKT1, DPF3, NUMB, TSHR, PAX9, DIO2, EML1, IGH@, TRD@, TCL1B, ANG, MMP14, XRCC3, ZFP36L1, TCL1A, TRA@, PTPN21, NDRG2, FUT8, TRA, SEL1L, GPR68, MEG3, OTX2, LGALS3, NIN, FOXA1, TRD, SIX1, TRAF3, STRN3, IGH	hsa-mir-1201, SNORD126, mgU6-53B, mgU6-53, hsa-mir-208a, hsa-mir-208b, hsa-mir-4307, hsa-mir-3171, hsa-mir-624, hsa-mir-3172, SNORD127, hsa-mir-4308, hsa-mir-548h-1, hsa-mir-625, hsa-mir-1260, ACA65, SNORA11B, hsa-mir-3173, U93, hsa-mir-342, hsa-mir-345, hsa-mir-770, hsa-mir-493, hsa-mir-337, hsa-mir-665, hsa-mir-431, hsa-mir-433, hsa-mir-127, hsa-mir-432, hsa-mir-136, 14q(0), hsa-mir-370, 14q(I-…	S-4ETOO	S-3HXYB	chr14:20511672-107285437
UPN2	LOH		15	q26.3	q11.2	807	79676.7	24981	arr[hg19] 15q11.2q26.3(22,752,398-102,429,049) hmz	TUBGCP5, CYFIP1, NIPA2, NIPA1, LOC283683, WHAMMP3, GOLGA8I, HERC2P2, HERC2P7, GOLGA8EP, LOC440243, GOLGA8S, MIR4508, MKRN3, MAGEL2, NDN, PWRN2, PWRN1, NPAP1, SNRPN, SNURF, SNORD107, PWARSN, PWAR5, SNORD64, SNORD108, SNORD109A, SNORD109B, SNORD116-1, SNORD116-2, SNORD116-9, SNORD116-3, SNORD116-4, SNORD116-7, SNORD116-5, SNORD116-6, SNORD116-8, SNORD116-10, SNORD116-11, SNORD116-12, SNORD116-13, S…	C15orf55, LTK, PML, ITPKA, BLM, ATP10A, BMF, CTSH, SPINT1, BUB1B, NEIL1, MAPK6, PKM2, RASGRF1, GCNT3, PLCB2, IGF1R, KIAA0101, SPRED1, COPS2, TCF12, SHC4, GOLGA6A, NTRK3, ITGA11, UBE3A, TRPM1, TYRO3, hsa-mir-626, THBS1, CASC5, IDH2, ADAM10	HBII-436, HBII-13, HBII-437, HBII-438A, HBII-85-1, HBII-85-2, HBII-85-3, HBII-85-4, HBII-85-5, HBII-85-6, HBII-85-7, HBII-85-8, HBII-85-9, HBII-85-10, HBII-85-11, HBII-85-12, HBII-85-13, HBII-85-14, HBII-85-15, HBII-85-16, HBII-85-17, HBII-85-18, HBII-85-19, HBII-85-20, HBII-85-21, HBII-85-22, HBII-85-23, HBII-85-24, HBII-85-25, HBII-85-26, HBII-85-27, HBII-85-28, HBII-85-29, HBII-52-1, HBII-52-2…	S-4FEVG	S-3ERSU	chr15:22752398-102429049
UPN2	Gain	2.83	17	q25.3	p13.3	1373	81041.4	73347	arr[hg19] 17p13.3q25.3(525-81,041,938)x2-3	DOC2B, RPH3AL, LOC100506388, C17orf97, FAM101B, VPS53, FAM57A, GEMIN4, DBIL5P, GLOD4, RNMTL1, NXN, TIMM22, ABR, MIR3183, BHLHA9, TUSC5, YWHAE, CRK, MYO1C, INPP5K, PITPNA-AS1, PITPNA, SLC43A2, SCARF1, RILP, PRPF8, TLCD2, MIR22HG, MIR22, WDR81, SERPINF2, SERPINF1, SMYD4, RPA1, RTN4RL1, DPH1, OVCA2, MIR132, MIR212, HIC1, SMG6, SRR, TSR1, SNORD91B, SNORD91A, SGSM2, MNT, LOC284009, METTL16, PAFAH1B1, …	IKZF3, FAM57A, NCOR1, MAPK7, MLLT6, GAST, SHBG, SLC9A3R1, SLC4A1, PER1, STAT5B, SEPT9, AXIN2, COL1A1, KDM6B, BRCA1, ENPP7, RABEP1, ETV4, DDX5, TRAF4, GRN, MYBBP1A, KSR1, LASP1, SPECC1, IGF2BP1, TBX2, TIMP2, CDC6, HIC1, CLDN7, ELAC2, SLC16A3, CRLF3, BCAS3, RNF213, TAF15, USP6, ALOX15, RPL26, CASC3, FLCN, PRKAR1A, NF1, GRB2, ASPSCR1, SUZ12, MIR21, RAC3, PYY, GAS7, DLX4, SRSF2, XAF1, PPP1R1B, ALOX12…	hsa-mir-3183, hsa-mir-22, hsa-mir-132, hsa-mir-212, HBII-296B, HBII-296A, hsa-mir-1253, hsa-mir-195, hsa-mir-497, hsa-mir-324, ACA48, mgU6-77, U67, ACA68, hsa-mir-4314, U8, hsa-mir-744, hsa-mir-548h-3, hsa-mir-1288, U49B, U49A, HBII-135, hsa-mir-33b, U3-2, U3-2B, U3-4, U3, U3-3, hsa-mir-1180, ACA59B, U42B, mgh18S-121, U42A, Z17B, hsa-mir-451, hsa-mir-144, hsa-mir-423, hsa-mir-3184, hsa-mir-193a, …	C-5VAZU	S-4LRWR	chr17:525-81041938
UPN2	Gain	3	18	q21.2	q21.2	1	262.236	381	arr[hg19] 18q21.2(50,871,937-51,134,173)x3	DCC	DCC		C-4XBYR	S-4OSON	chr18:50871937-51134173
UPN2	Gain	4	21	q22.3	q11.2	293	33090.9	33620	arr[hg19] 21q11.2q22.3(15,006,457-48,097,372)x4	POTED, C21orf15, ANKRD20A11P, LIPI, RBM11, ABCC13, HSPA13, SAMSN1, SAMSN1-AS1, LOC388813, NRIP1, USP25, LINC00478, MIR99A, MIRLET7C, MIR125B2, C21orf37, CXADR, BTG3, C21orf91-OT1, C21orf91, CHODL-AS1, CHODL, TMPRSS15, LINC00320, NCAM2, RNU6-67P, LINC00317, LINC00308, D21S2088E, LOC339622, LINC00158, MIR155HG, MIR155, LINC00515, MRPL39, JAM2, ATP5J, GABPA, APP, CYYR1, ADAMTS1, ADAMTS5, MIR4759, MI…	PTTG1IP, MIR125B2, OLIG2, TFF1, ETS2, S100B, CSTB, RUNX1, U2AF1, TFF3, NRIP1, DYRK1A, TMPRSS3, TMPRSS2, ERG, TFF2, TIAM1, ADAMTS1	hsa-mir-3118-5, hsa-mir-99a, hsa-let-7c, hsa-mir-125b-2, hsa-mir-548x, hsa-mir-155, hsa-mir-4327, ACA67, hsa-mir-802, hsa-mir-3197	C-6OPRF	C-3ELOA	chr21:15006457-48097372
UPN2	GainMosaic	2.75197	X	p22.33	p22.33	17	2322.67	3455	arr[hg19] Xp22.33 or Yp11.32(168,546-2,491,218 or 118,546-2,441,218)x2-3	PLCXD1, GTPBP6, LINC00685, PPP2R3B, SHOX, CRLF2, CSF2RA, MIR3690, IL3RA, SLC25A6, ASMTL-AS1, ASMTL, P2RY8, AKAP17A, ASMT, DHRSX, ZBED1	IL3RA, P2RY8, CRLF2		C-5QGHR	C-5DPAA	chrX:168546-2491218
UPN2	Gain	2	X	q28	p22.33	1020	155065	189818	arr[hg19] Xp22.33q28(168,546-155,233,731)x2	PLCXD1, GTPBP6, LINC00685, PPP2R3B, SHOX, CRLF2, CSF2RA, MIR3690, IL3RA, SLC25A6, ASMTL-AS1, ASMTL, P2RY8, AKAP17A, ASMT, DHRSX, ZBED1, CD99P1, LINC00102, CD99, XG, XGPY2, GYG2, ARSD, ARSE, ARSH, ARSF, CXorf28, MXRA5, PRKX, LOC389906, NLGN4X, MIR4770, VCX3A, HDHD1, MIR4767, STS, VCX, PNPLA4, MIR651, VCX2, VCX3B, KAL1, FAM9A, FAM9B, TBL1X, GPR143, SHROOM2, LOC100288814, WWC3, CLCN4, MID1, HCCS, AR…	ZRSR2, PHF6, SSX2, ARMCX1, IL3RA, ARMCX2, ZBTB33, ARMCX3, P2RY8, REPS2, TFE3, FOXP3, RHOXF2, ELF4, MIR221, BRWD3, SEPT6, FOXO4, BTK, KDM6A, RBBP7, FAM123B, AMOT, DACH2, MTCP1, Sep.06, MIR222, AR, SPANXA1, CRLF2, L1CAM, NONO, AIFM1, GATA1, DKC1, MSN, CXCR3, RPL10, BCOR, GPC3, STAG2	hsa-mir-651, hsa-mir-1308, ACA12, hsa-mir-548f-5, hsa-mir-221, hsa-mir-222, SNORA11C, hsa-mir-532, hsa-mir-188, hsa-mir-500, hsa-mir-362, hsa-mir-501, hsa-mir-500b, hsa-mir-660, hsa-mir-502, SNORA11E, SNORA11D, hsa-mir-98, hsa-let-7f-2, U107, hsa-mir-1468, hsa-mir-223, hsa-mir-421, hsa-mir-374b, hsa-mir-545, hsa-mir-374a, hsa-mir-384, hsa-mir-325, hsa-mir-4328, hsa-mir-548i-4, hsa-mir-1321, hsa-m…	C-5QGHR	C-6KTXX	chrX:168546-155233731
UPN2	LOH		X	q28	q11.1	621	93044.9	12270	arr[hg19] Xq11.1q28(61,932,503-154,977,448) hmz	SPIN4, LOC92249, ARHGEF9, MIR1468, AMER1, ASB12, MTMR8, ZC4H2, ZC3H12B, LAS1L, FRMD8P1, MSN, MIR223, VSIG4, HEPH, EDA2R, AR, OPHN1, YIPF6, STARD8, EFNB1, PJA1, LINC00269, FAM155B, EDA, MIR676, AWAT2, OTUD6A, IGBP1, DGAT2L6, AWAT1, P2RY4, ARR3, RAB41, PDZD11, KIF4A, GDPD2, DLG3, TEX11, SLC7A3, SNX12, FOXO4, CXorf65, IL2RG, MED12, NLGN3, BCYRN1, GJB1, ZMYM3, NONO, ITGB1BP2, TAF1, INGX, OGT, ACRC, C…	PHF6, ARMCX1, ARMCX2, ZBTB33, ARMCX3, RHOXF2, ELF4, BRWD3, SEPT6, FOXO4, BTK, FAM123B, AMOT, DACH2, MTCP1, Sep.06, AR, SPANXA1, L1CAM, NONO, AIFM1, DKC1, MSN, CXCR3, RPL10, GPC3, STAG2	hsa-mir-1468, hsa-mir-223, hsa-mir-421, hsa-mir-374b, hsa-mir-545, hsa-mir-374a, hsa-mir-384, hsa-mir-325, hsa-mir-4328, hsa-mir-548i-4, hsa-mir-1321, hsa-mir-361, hsa-mir-548m, hsa-mir-652, U96b, hsa-mir-4329, HBI-36, hsa-mir-764, hsa-mir-1912, hsa-mir-1264, hsa-mir-1298, hsa-mir-1911, hsa-mir-448, hsa-mir-1277, hsa-mir-766, U69, hsa-mir-220a, hsa-mir-363, hsa-mir-92a-2, hsa-mir-19b-2, hsa-mir-2…	S-4DSQE	S-3IEUP	chrX:61932503-154977448
UPN3	Gain	3	1	q44	q21.1	1127	103827	103784	arr[hg19] 1q21.1q44(145,398,177-249,224,684)x3	LOC100288142, NBPF10, HFE2, TXNIP, POLR3GL, ANKRD34A, LIX1L, RBM8A, GNRHR2, PEX11B, ITGA10, ANKRD35, PIAS3, NUDT17, POLR3C, RNF115, CD160, PDZK1, GPR89A, GPR89C, PDZK1P1, NBPF24, NBPF11, HYDIN2, NBPF12, LOC728989, NBPF13P, PRKAB2, PDIA3P, FMO5, CHD1L, LINC00624, BCL9, ACP6, GJA5, GJA8, GPR89B, NBPF8, MIR5087, FLJ39739, PPIAL4B, PPIAL4A, PPIAL4F, PPIAL4D, NBPF14, NBPF9, NBPF15, NBPF16, PPIAL4E, LO…	ASPM, SELE, RCSD1, S100A1, AKT3, PTPN7, S100A7, KIF14, DHX9, TP53BP2, CKS1B, SHC1, GPA33, BCL9, KCNH1, PSEN2, ARHGEF2, PVRL4, S100A13, ECM1, USF1, ATF3, ARNT, ENAH, PTGS2, FH, IGSF8, GLRX2, TNN, ADIPOR1, S100A8, RGS2, PBX1, MEF2D, TROVE2, CREG1, PLA2G4A, MLLT11, CRTC2, SDHC, MAPKAPK2, DUSP10, GAS5, EGLN1, SMYD3, TNFSF18, CENPF, MIXL1, TPM3, S100A9, TPR, S100A10, S100A4, PRRX1, ABL2, PTPRC, ESRRG,…	hsa-mir-4257, hsa-mir-554, hsa-mir-190b, hsa-mir-4258, hsa-mir-92b, hsa-mir-555, ACA42, ACA26, hsa-mir-9-1, hsa-mir-765, hsa-mir-4259, hsa-mir-556, hsa-mir-921, hsa-mir-1255b-2, hsa-mir-557, hsa-mir-3119-2, hsa-mir-3119-1, hsa-mir-1295, hsa-mir-214, hsa-mir-3120, hsa-mir-199a-2, U81, U47, U80, U79, U78, U44, U77, U76, U75, U74, HBI-100, hsa-mir-488, hsa-mir-3121, hsa-mir-1278, hsa-mir-181b-1, hsa…	C-6QWXA	C-4YYLK	chr1:145398177-249224684
UPN3	LOH		2	q37.3	p25.3	1494	242760	65827	arr[hg19] 2p25.3q37.3(15,702-242,775,910) hmz	FAM110C, SH3YL1, ACP1, FAM150B, TMEM18, LOC339822, SNTG2, TPO, PXDN, MYT1L, LOC730811, TSSC1, TRAPPC12, ADI1, RNASEH1, LOC100506054, RPS7, COLEC11, ALLC, LOC100505964, LOC727982, SOX11, LOC150622, LOC400940, LINC00487, CMPK2, RSAD2, RNF144A-AS1, RNF144A, LOC100506274, LOC339788, LINC00299, ID2, KIDINS220, MBOAT2, ASAP2, ITGB1BP1, CPSF3, IAH1, ADAM17, YWHAQ, TAF1B, GRHL1, KLF11, CYS1, RRM2, C2orf4…	MTA3, EPCAM, AFF3, IL1B, ATF2, RTN4, E2F6, MYCN, TMSB10, ADAM17, HOXD11, IKZF2, SF3B1, MSH6, DIRC1, BRE, BOK, STRN, BCL2L11, PMS1, MAL, ZEB2, MSH2, PDE11A, LOXL3, DNMT3A, REL, MIR10B, HSPD1, HOXD13, ERCC3, BIN1, ATIC, DIRC3, AAMP, EML4, DDX1, CFLAR, XPO1, NLRC4, LHCGR, PTMA, ADAM23, CXCR7, CAPG, TGFBRAP1, RANBP2, PAX8, PAX3, ALK, BIRC6, INPP5D, SEPT2, FHL2, ACVR2A, TTL, MAP2, SOX11, RHOB, MERTK, …	hsa-mir-4261, ACA67B, hsa-mir-548s, hsa-mir-4262, hsa-mir-3125, hsa-mir-1301, hsa-mir-4263, HBII-316, U53, hsa-mir-558, hsa-mir-559, hsa-mir-217, hsa-mir-216a, hsa-mir-216b, U70B, hsa-mir-3126, SNORA36C, hsa-mir-1285-2, hsa-mir-4264, U94, hsa-mir-3127, HBII-289, hsa-mir-4265, hsa-mir-4266, hsa-mir-4267, hsa-mir-1302-3, hsa-mir-663b, hsa-mir-128-1, U70F, hsa-mir-933, hsa-mir-10b, hsa-mir-1246, hsa…	S-3PKEB	S-4FWRM	chr2:15702-242775910
UPN3	LOH		3	q29	p26.3	1279	197789	54994	arr[hg19] 3p26.3q29(62,613-197,851,260) hmz	CHL1, CNTN6, CNTN4, CNTN4-AS2, IL5RA, TRNT1, CRBN, LRRN1, SETMAR, SUMF1, ITPR1, EGOT, BHLHE40-AS1, BHLHE40, ARL8B, EDEM1, MIR4790, GRM7, LMCD1-AS1, LMCD1, LINC00312, SSUH2, CAV3, OXTR, RAD18, SRGAP3, SRGAP3-AS3, THUMPD3, SETD5-AS1, SETD5, LHFPL4, MTMR14, CPNE9, BRPF1, OGG1, CAMK1, TADA3, ARPC4, ARPC4-TTLL3, TTLL3, RPUSD3, CIDEC, JAGN1, IL17RE, IL17RC, CRELD1, PRRT3, PRRT3-AS1, EMC3, LOC401052, CI…	MINA, KIAA1524, PTPRG, SMARCC1, NCKIPSD, DIRC2, CD200, MBD4, PLCD1, CSTA, GHRL, CCR9, MLF1, FANCD2, MST1R, FAM107A, PIK3CA, GATA2, HLTF, RARRES1, HYAL2, SATB1, RUVBL1, EIF4A2, PPARG, SEMA3B, XPC, RASSF1, PRKCD, CTNNB1, FOXP1, LPP, CCR1, SEMA3F, EPHA3, PLXNB1, ROBO1, RPN1, HEMK1, CBLB, BTLA, ATR, FHIT, MLH1, CCR2, MME, MAP4, FAIM, CISH, SOX2, TFRC, LIMD1, TNFSF10, SIAH2, RAP2B, VHL, GSK3B, DLG1, P…	hsa-mir-378b, hsa-mir-885, ACA7, hsa-mir-4270, hsa-mir-3134, hsa-mir-563, hsa-mir-3135, hsa-mir-466, hsa-mir-128-2, hsa-mir-26a-1, ACA6, E2, hsa-mir-138-1, hsa-mir-564, hsa-mir-1226, hsa-mir-2115, hsa-mir-711, hsa-mir-425, hsa-mir-191, hsa-mir-4271, hsa-mir-566, hsa-let-7g, hsa-mir-135a-1, HBII-108, HBII-108B, HBII-210, hsa-mir-4272, hsa-mir-3136, hsa-mir-1284, hsa-mir-1324, hsa-mir-4273, hsa-mir…	S-4GHAD	S-3PMAV	chr3:62613-197851260
UPN3	Gain	3	4	q35.2	p16.3	891	190889	153163	arr[hg19] 4p16.3q35.2(68,345-190,957,473)x3	ZNF595, ZNF718, ZNF876P, ZNF732, ZNF141, ABCA11P, ZNF721, PIGG, PDE6B, ATP5I, MYL5, MFSD7, PCGF3, LOC100129917, CPLX1, GAK, TMEM175, DGKQ, SLC26A1, IDUA, FGFRL1, RNF212, TMED11P, SPON2, LOC100130872, CTBP1, CTBP1-AS2, MAEA, UVSSA, CRIPAK, FAM53A, SLBP, TMEM129, TACC3, FGFR3, LETM1, WHSC1, SCARNA22, NELFA, MIR943, C4orf48, NAT8L, POLN, HAUS3, MXD4, MIR4800, ZFYVE28, LOC402160, RNF4, FAM193A, TNIP2…	TET2, RASL11B, CHIC2, PTPN13, TACC3, MAPK10, FGFR3, NR3C2, RHOH, RAP1GDS1, SYNPO2, RASSF6, WHSC1, FBXW7, SPP1, FGF2, LEF1, PDGFRA, NUDT6, AREG, EIF4E, KIT, FRYL, SORBS2, NPY1R, S100P, FAT1, FIP1L1, REST, AFF1, ING2, RCHY1, NFKB1, MAD2L1, HNRNPD	hsa-mir-571, ACA11, hsa-mir-943, hsa-mir-4274, hsa-mir-95, hsa-mir-548i-2, hsa-mir-3138, hsa-mir-572, hsa-mir-218-1, hsa-mir-573, hsa-mir-4275, hsa-mir-1255b-1, hsa-mir-574, HBI-6, hsa-mir-1269, hsa-mir-575, hsa-mir-1255a, hsa-mir-576, hsa-mir-297, hsa-mir-367, hsa-mir-302d, hsa-mir-302a, hsa-mir-302c, hsa-mir-302b, hsa-mir-1243, hsa-mir-577, hsa-mir-1973, ACA24, hsa-mir-2054, hsa-mir-3139, hsa-m…	C-4FYJV	C-7HDOD	chr4:68345-190957473
UPN3	Gain	3	5	p11	p15.33	187	46275.8	43068	arr[hg19] 5p15.33p11(113,576-46,389,339)x3	PLEKHG4B, LRRC14B, CCDC127, SDHA, PDCD6, AHRR, C5orf55, EXOC3, PP7080, SLC9A3, MIR4456, LOC100996325, CEP72, TPPP, ZDHHC11, BRD9, TRIP13, LOC100506688, NKD2, SLC12A7, MIR4635, SLC6A19, SLC6A18, TERT, MIR4457, CLPTM1L, SLC6A3, LPCAT1, SDHAP3, LOC728613, MIR4277, MRPL36, NDUFS6, IRX4, IRX2, C5orf38, LOC285577, IRX1, LOC340094, ADAMTS16, KIAA0947, FLJ33360, MED10, UBE2QL1, LOC255167, NSUN2, SRD5A1, …	DAB2, TRIO, PRLR, IL7R, SEPP1, PDCD6, LIFR	hsa-mir-4277, hsa-mir-4278, SNORD123, hsa-mir-887, hsa-mir-4279, hsa-mir-579, hsa-mir-580, HBII-240, hsa-mir-1274a	S-3RLNJ	C-4QSYF	chr5:113576-46389339
UPN3	LOH		5	q35.3	q11.1	848	131131	35816	arr[hg19] 5q11.1q35.3(49,560,858-180,692,321) hmz	EMB, PARP8, LOC642366, ISL1, PELO, ITGA1, ITGA2, MOCS2, LOC257396, FST, NDUFS4, ARL15, MIR581, HSPB3, SNX18, ESM1, GZMK, GZMA, CDC20B, GPX8, MIR449A, MIR449B, MIR449C, MCIDAS, CCNO, DHX29, SKIV2L2, PPAP2A, MIR5687, RNF138P1, SLC38A9, DDX4, IL31RA, IL6ST, FLJ31104, ANKRD55, MAP3K1, SETD9, MIER3, GPBP1, ACTBL2, PLK2, GAPT, RAB3C, PDE4D, PART1, DEPDC1B, ELOVL7, ERCC8, NDUFAF2, SMIM15, ZSWIM6, C5orf6…	CCNB1, FNIP1, GNB2L1, AFF4, EGR1, TNIP1, EBF1, APC, IL3, NSD1, ENC1, ARHGAP26, SPINK7, ITK, NR3C1, CSF1R, TSLP, ACSL6, MAPK9, PTTG1, IRF1, NKX2-5, RANBP17, GZMA, PDGFRB, FST, SNX2, TLX3, MSH3, NPM1, SSBP2, CSNK1A1, HDAC3, IQGAP2, ERCC8, VCAN, MEF2C, LOX, TGFBI	hsa-mir-581, hsa-mir-449a, hsa-mir-449b, hsa-mir-449c, hsa-mir-582, HBI-115, U109, hsa-mir-4280, hsa-mir-9-2, hsa-mir-2277, hsa-mir-583, hsa-mir-548p, hsa-mir-548f-3, ACA13, hsa-mir-1244-2, hsa-mir-1289-2, hsa-mir-886, hsa-mir-874, U63, U19, hsa-mir-584, hsa-mir-143, hsa-mir-145, hsa-mir-378, hsa-mir-1294, hsa-mir-3141, hsa-mir-1303, hsa-mir-3142, hsa-mir-146a, hsa-mir-103-1, hsa-mir-103-1-as, hs…	S-4JAZY	S-4LLYZ	chr5:49560858-180692321
UPN3	Gain	3	6	q27	p25.3	1220	170763	155053	arr[hg19] 6p25.3q27(156,974-170,919,482)x3	DUSP22, IRF4, EXOC2, HUS1B, LOC285768, FOXQ1, FOXF2, FOXC1, GMDS, LOC100508120, C6orf195, MYLK4, WRNIP1, SERPINB1, MIR4645, MGC39372, SERPINB9, SERPINB6, DKFZP686I15217, NQO2, HTATSF1P2, RIPK1, BPHL, TUBB2A, LOC100507194, TUBB2B, PSMG4, SLC22A23, PXDC1, FAM50B, PRPF4B, FAM217A, C6orf201, ECI2, CDYL, RPP40, PPP1R3G, LYRM4, MIR3691, FARS2, NRN1, F13A1, LY86-AS1, LY86, RREB1, SSR1, CAGE1, RIOK1, DSP…	HIST1H4F, PPARD, TFAP2A, IRF4, IGF2R, CD109, LIN28B, EPHA7, CEP85L, DDX43, HIST1H3F, POLH, hsa-mir-548a-2, ID4, ZFAND3, HMGA1, CDKN1A, HFE, EEF1A1, BACH2, JARID2, CTGF, MLLT4, DAXX, BAK1, AGER, CCNC, THBS2, MYB, CASP8AP2 , CITED2, DEK, CAGE1, RUNX2, NFKBIE, SESN1, MAPK13, FOXO3, RNASET2, FGFR1OP, TFEB, WISP3, IER3, LATS1, TNF, AHI1, HIST1H4G, ARMC2, CCND3, MAP3K7, SOX4, HDAC2, E2F3, PLAGL1, ECT2L…	hsa-mir-548a-1, hsa-mir-3143, U32B, hsa-mir-877, U83, U84, ACA38, U48, U52, hsa-mir-1236, hsa-mir-219-1, hsa-mir-1275, hsa-mir-586, hsa-mir-206, hsa-mir-133b, hsa-mir-548u, hsa-mir-30c-2, hsa-mir-30a, hsa-mir-4282, U50, U50B, hsa-mir-2113, hsa-mir-587, hsa-mir-548b, hsa-mir-3144, hsa-mir-588, U101, HBII-429, ACA33, hsa-mir-548a-2, hsa-mir-3145, hsa-mir-1273c, hsa-mir-1202, ACA20, ACA29, hsa-mir-1…	C-3GOBV	C-5ELRJ	chr6:156974-170919482
UPN3	LOH		7	q36.3	p22.3	1140	159075	48910	arr[hg19] 7p22.3q36.3(44,166-159,119,220) hmz	FAM20C, LOC100288524, LOC442497, PDGFA, FLJ44511, PRKAR1B, HEATR2, SUN1, GET4, ADAP1, COX19, CYP2W1, C7orf50, MIR339, GPR146, GPER, ZFAND2A, UNCX, MICALL2, INTS1, MAFK, TMEM184A, PSMG3, PSMG3-AS1, TFAMP1, ELFN1, MAD1L1, MIR4655, FTSJ2, NUDT1, SNX8, EIF3B, CHST12, LFNG, MIR4648, BRAT1, IQCE, TTYH3, AMZ1, GNA12, CARD11, SDK1, FOXK1, AP5Z1, MIR4656, RADIL, PAPOLB, MMD2, RNF216P1, RBAK, RBAK-RBAKDN, …	HUS1, TRB, EZH2, GRB10, HBP1, SHH, GATAD1, NRF1, ZC3HAV1, TWIST1, SPAM1, EZH2, CREB3L2, EZH2, AKAP9, MET, EZH2, RELN, NRCAM, TRB@, TRIM24, POM121, IL6, DDC, ABCB1, EPHA1, CDK6, IKZF1, THSD7A, POT1, TRPV6, JAZF1, CLDN4, STEAP2, MNX1, POU6F2, LIMK1, DMTF1, SFRP4, PEX1, PEG10, POM121C, HIP1, HOXA13, HIPK2, BRAF, TRG@, ACTB, HOXA11, COL1A2, BCL7B, HGF, STEAP1, CYP2W1, ASNS, ERVW-1, GPER, TAC1, ELN, H…	hsa-mir-339, hsa-mir-589, hsa-mir-1302-6, hsa-mir-3146, hsa-mir-1183, HBII-336, hsa-mir-148a, hsa-mir-196b, hsa-mir-550-1, hsa-mir-550-2, hsa-mir-548n, hsa-mir-1200, ACA9, ACA5, ACA5c, ACA5b, ACA15, hsa-mir-4283-1, hsa-mir-3147, hsa-mir-4283-2, ACA22, hsa-mir-4284, hsa-mir-590, ACA14a, hsa-mir-1285-1, hsa-mir-653, hsa-mir-489, hsa-mir-591, hsa-mir-25, hsa-mir-93, hsa-mir-106b, hsa-mir-4285, hsa-m…	S-3YCTM	S-4TJRY	chr7:44166-159119220
UPN3	Gain	3	8	q24.3	p23.3	837	146138	125254	arr[hg19] 8p23.3q24.3(158,048-146,295,771)x3	RPL23AP53, ZNF596, FAM87A, FBXO25, TDRP, ERICH1, ERICH1-AS1, LOC286083, DLGAP2, CLN8, MIR596, ARHGEF10, KBTBD11, MYOM2, CSMD1, LOC100287015, MCPH1, ANGPT2, AGPAT5, MIR4659A, MIR4659B, XKR5, LOC100652791, DEFB1, DEFA6, DEFA4, DEFA8P, DEFA9P, DEFA10P, DEFA1B, DEFA1, DEFT1P2, DEFT1P, DEFA3, DEFA11P, DEFA5, LINC00965, FAM66B, DEFB109P1B, USP17L1P, USP17L4, ZNF705G, DEFB4B, DEFB103B, DEFB103A, SPAG11B…	PLAG1, ENPP2, KAT6A, CTHRC1, SNAI2, MCPH1, NAT2, TACC1, BAALC, CYP7A1, CLU, MYBL1, NKX3-1, RUNX1T1, IDO1, CYP7B1, CTSB, NCOA2, RECQL4, RHOBTB2, RAD21, BOP1, COX6C, TP53INP1, NAT1, TOX, EIF4EBP1, GGH, EXT1, DEFB1, PTK2B, TPD52, KIAA1967, IDO2, WHSC1L1, WWP1, MYC, PAG1, FGFR1, PCM1, PTK2, NDRG1, DLC1, PSCA, LOXL2, ADAM9, ASH2L, RNF139, MTUS1, NBN, HAS2, MAFA, TNKS, WRN, TNFRSF11B, EBAG9	hsa-mir-596, hsa-mir-548i-3, hsa-mir-597, hsa-mir-124-1, hsa-mir-4286, hsa-mir-1322, hsa-mir-598, hsa-mir-383, hsa-mir-548v, hsa-mir-320a, hsa-mir-548h-4, hsa-mir-4287, hsa-mir-4288, hsa-mir-3148, U13, hsa-mir-486, U54, hsa-mir-124-2, HBII-276, hsa-mir-2052, hsa-mir-3149, hsa-mir-3150, U72, hsa-mir-599, hsa-mir-875, hsa-mir-1273, hsa-mir-3151, hsa-mir-548a-3, hsa-mir-2053, hsa-mir-548d-1, hsa-mir…	C-5YVTF	C-3WEHE	chr8:158048-146295771
UPN3	Gain	3	9	q34.3	p24.3	961	140817	100046	arr[hg19] 9p24.3q34.3(203,861-141,020,389)x3	C9orf66, DOCK8, KANK1, DMRT1, DMRT3, DMRT2, SMARCA2, FLJ35024, VLDLR, KCNV2, KIAA0020, RFX3, GLIS3, GLIS3-AS1, SLC1A1, SPATA6L, PPAPDC2, CDC37L1, AK3, RCL1, MIR101-2, JAK2, INSL6, INSL4, RLN2, RLN1, PLGRKT, CD274, PDCD1LG2, KIAA1432, ERMP1, MLANA, KIAA2026, MIR4665, RANBP6, IL33, TPD52L3, UHRF2, GLDC, KDM4C, C9orf123, PTPRD, TYRP1, LURAP1L, MPDZ, FLJ41200, LINC00583, NFIB, ZDHHC21, CER1, FREM1, L…	CDKN2A, MLLT3 (AF9), KDM4C, PRRX2, MIR126, SH3GL2, PPP2R4, SIGMAR1, HNRNPK, JAK2, MLLT3, PAEP, MIR7-1, PAX5, TEK, RLN2, DAB2IP, FANCG, SEMA4D, TNC, GFI1B, CCL27, CDK20, FNBP1, STOML2, DAPK1, NUP214, TAL2, RAPGEF1, PSIP1, MTAP, ANXA1, FAM22F, PTPRD, FOXE1, CDKN2B, CTSL1, GNAQ, WNK2, PTCH1, ALDOB, XPA, NOTCH1, IFNA1, TJP2, SYK, SET, RMRP, TXN, KLF4, NTRK2, NR4A3, HSPA5, ROR2, CNTRL, TNFSF15, CKS2, …	hsa-mir-101-2, hsa-mir-3152, U92, hsa-mir-491, hsa-mir-31, hsa-mir-876, hsa-mir-873, SNORD121B, SNORD121A, hsa-mir-1299, hsa-mir-204, hsa-mir-7-1, hsa-mir-4289, hsa-mir-3153, hsa-mir-4290, SNORA84, hsa-mir-4291, hsa-let-7a-1, hsa-let-7f-1, hsa-let-7d, hsa-mir-2278, hsa-mir-23b, hsa-mir-27b, hsa-mir-3074, hsa-mir-24-1, hsa-mir-1302-8, hsa-mir-32, hsa-mir-455, U70C, hsa-mir-147, HBII-295, hsa-mir-6…	C-6JAPU	C-5LURI	chr9:203861-141020389
UPN3	Gain	3	10	q26.3	p15.3	921	135297	133205	arr[hg19] 10p15.3q26.3(130,294-135,427,143)x3	ZMYND11, DIP2C, MIR5699, PRR26, LARP4B, GTPBP4, IDI2, IDI2-AS1, IDI1, WDR37, LINC00200, ADARB2, ADARB2-AS1, LINC00700, LINC00701, PFKP, PITRM1, PITRM1-AS1, KLF6, LINC00704, LINC00705, AKR1E2, AKR1C6P, AKR1C1, AKR1C2, AKR1C3, AKR1CL1, AKR1C4, UCN3, TUBAL3, NET1, CALML5, CALML3, ASB13, FAM208B, GDI2, ANKRD16, FBXO18, IL15RA, IL2RA, RBM17, PFKFB3, MIR3155A, MIR3155B, LOC399715, PRKCQ, PRKCQ-AS1, LIN…	LOXL4, EIF3A, PDCD4, SIRT1, RET, ZMIZ1, ADD3, AKR1C3, LGI1, MLLT10, FGF8, MRC1, PAX2, BAG3, DMBT1, BNIP3, BLNK, PTEN, RHOBTB1, KAT6B, TLX1, AIFM2, PSAP, LDB1, MAPK8, NT5C2, NET1, ARID5B, ERCC6, HTRA1, BMI1, NCOA4, TET1, CCDC6, MXI1, DKK1, KLF6, ABI1, SNCG, BTRC, NFKB2, GATA3, ALOX5, FGFR2, ADAM12	hsa-mir-3155, hsa-mir-548q, hsa-mir-4293, hsa-mir-1265, hsa-mir-511-1, hsa-mir-511-2, hsa-mir-1915, hsa-mir-603, hsa-mir-604, hsa-mir-938, hsa-mir-3156-1, hsa-mir-4294, hsa-mir-605, hsa-mir-548f-1, hsa-mir-1296, HBII-419, hsa-mir-1254, hsa-mir-606, hsa-mir-346, hsa-mir-107, hsa-mir-3157, hsa-mir-607, hsa-mir-1287, U108, hsa-mir-608, hsa-mir-3158-1, hsa-mir-3158-2, hsa-mir-146b, hsa-mir-1307, hsa-…	C-7HANN	C-5DPFD	chr10:130294-135427143
UPN3	LOH		11	q25	p15.5	1462	134744	41342	arr[hg19] 11p15.5q25(198,509-134,942,626) hmz	ODF3, BET1L, RIC8A, SIRT3, PSMD13, NLRP6, ATHL1, IFITM5, IFITM2, IFITM1, IFITM3, B4GALNT4, PKP3, SIGIRR, ANO9, PTDSS2, RNH1, HRAS, LRRC56, C11orf35, RASSF7, MIR210HG, MIR210, LOC143666, PHRF1, IRF7, CDHR5, SCT, DRD4, DEAF1, TMEM80, EPS8L2, TALDO1, PDDC1, NS3BP, CEND1, SLC25A22, PIDD, RPLP2, SNORA52, PNPLA2, EFCAB4A, CD151, POLR2L, TSPAN4, CHID1, AP2A2, MUC6, MUC2, MUC5B, TOLLIP, TOLLIP-AS1, BRSK2…	INPPL1, KIAA1549L (C11orf41), BAD, B3GNT6, PLCB3, SPI1, DNAJC4, TAGLN, MUC6, BIRC2, ARHGEF12, YAP1, NUDT22, THY1, RRM1, SIPA1, C11orf30, NUP98, NUMA1, THRSP, RAD9A, MIR125B1, FLI1, HTATIP2, ESRRA, CBL, CTNND1, FEN1, NEU3, LMO1, NNMT, TMPRSS4, HRAS, PPP1R14B, POU2AF1, CD248, ETS1, CST6, EED, RSF1, STIP1, DDX10, H2AFX, DDB2, SPA17, PAX6, RAG2, EXT2, CCND1, ATM, FERMT3, EIF3F, RAG1, NPAT, CHKA, TRPT…	hsa-mir-210, ACA52, hsa-mir-4298, hsa-mir-675, hsa-mir-483, ACA54, hsa-mir-302e, ACA3, ACA3-2, ACA23, U97, hsa-mir-4299, U14B, U14A, hsa-mir-3159, hsa-mir-610, hsa-mir-670, hsa-mir-129-2, hsa-mir-3160-1, hsa-mir-3160-2, HBII-166, hsa-mir-3161, hsa-mir-130a, hsa-mir-3162, hsa-mir-611, hsa-mir-1908, U99, U22, U31, U30, U29, U28, U27, U26, U25, hsa-mir-1237, hsa-mir-192, hsa-mir-194-2, hsa-mir-612, …	S-3GNVD	S-3VNVU	chr11:198509-134942626
UPN3	LOH		12	q24.33	p13.33	1184	133612	35528	arr[hg19] 12p13.33q24.33(166,332-133,778,166) hmz	IQSEC3, LOC574538, SLC6A12, SLC6A13, KDM5A, CCDC77, B4GALNT3, NINJ2, WNK1, RAD52, ERC1, LINC00942, FBXL14, WNT5B, MIR3649, ADIPOR2, CACNA2D4, LRTM2, LINC00940, DCP1B, CACNA1C, CACNA1C-AS4, CACNA1C-IT3, CACNA1C-AS1, LOC283440, FKBP4, ITFG2, NRIP2, LOC100507424, FOXM1, RHNO1, TULP3, TEAD4, TSPAN9, PRMT8, EFCAB4B, PARP11, CCND2, C12orf5, FGF23, FGF6, C12orf4, RAD51AP1, DYRK4, AKAP3, NDUFA9, GALNT8, …	DENR, SOCS2, ALDH2, IL22, CDKN1B, MDM2, HRK, CDK4, RAP1B, AGAP2, GUCY2C, HNRNPA1 , METAP2, KLRK1, GLI1, PTPN11, IL23A, KITLG, SARNP, BTG1, KDM5A, GABARAPL1, DDIT3, ELK3, ATF1, CD9, DRAM1, PXN, CCND2, FBRSL1, RECQL, VWF, SMARCC2, FOXM1, DUSP6, USP15, TRIAP1, ASCL1, PEBP1, ETNK1, SLC5A8, PRKAB1, HOXC11, PPFIBP1, PTHLH, SOX5, SH2B3, TSPAN8, MIR200C, RAN, CHFR, PA2G4, APAF1, EP400, P2RX7, ATF7IP, ERC…	U85, ACA57, hsa-mir-200c, hsa-mir-141, U89, hsa-mir-1244-3, hsa-mir-613, hsa-mir-614, hsa-mir-920, hsa-mir-4302, ACA34, hsa-mir-1291, ACA2a, ACA2b, hsa-mir-1293, hsa-mir-196a-2, hsa-mir-615, hsa-mir-148b, U59B, U59A, hsa-mir-1228, hsa-mir-616, hsa-mir-26a-2, hsa-let-7i, hsa-mir-548c, U70G, hsa-mir-1279, hsa-mir-1252, hsa-mir-617, hsa-mir-618, hsa-mir-492, hsa-mir-331, hsa-mir-1251, hsa-mir-135a-2…	S-3WBKX	S-4NRKL	chr12:166332-133778166
UPN3	LOH		13	q34	q11	459	95656.9	27733	arr[hg19] 13q11q34(19,438,806-115,095,705) hmz	ANKRD20A9P, LINC00442, RNU6-52P, TUBA3C, ANKRD26P3, LINC00421, TPTE2, MPHOSPH8, PSPC1, ZMYM5, ZMYM2, GJA3, GJB2, GJB6, CRYL1, MIR4499, IFT88, IL17D, N6AMT2, XPO4, LATS2, SAP18, SKA3, MRP63, MIPEPP3, ZDHHC20, MICU2, FGF9, LINC00424, BASP1P1, SGCG, SACS, SACS-AS1, LINC00327, TNFRSF19, MIPEP, C1QTNF9B-AS1, C1QTNF9B, ANKRD20A19P, SPATA13, MIR2276, SPATA13-AS1, C1QTNF9, PARP4, TPTE2P6, ATP12A, RNF17, …	STARD13, ELF1, LATS2, DLEU2, ST13P4, PDX1, RB1, hsa-mir-15a, FOXO1, TRIM13, CDX2, INTS6, ERCC5, LCP1, DACH1, KCNRG, ZMYM2, DGKH, KLF5, HSPH1, OLFM4, PAN3, GPC5, LHFP, SERP2, DLEU1, BRCA2, DLEU7, POU4F1, hsa-mir-16-1, FLT3, RAP2A	hsa-mir-2276, U102, ACA27, hsa-mir-4305, hsa-mir-320d-1, hsa-mir-621, hsa-mir-3168, ACA31, hsa-mir-16-1, hsa-mir-15a, hsa-mir-759, hsa-mir-1297, hsa-mir-3169, hsa-mir-622, hsa-mir-17, hsa-mir-18a, hsa-mir-19a, hsa-mir-20a, hsa-mir-19b-1, hsa-mir-92a-1, hsa-mir-3170, hsa-mir-623, hsa-mir-4306, hsa-mir-1267	S-3OKVX	S-4DINU	chr13:19438806-115095705
UPN3	Gain	3	14	q32.33	q11.2	770	86773.8	85690	arr[hg19] 14q11.2q32.33(20,511,672-107,285,437)x3	OR4L1, OR4K17, OR4N5, OR11G2, OR11H6, OR11H4, TTC5, CCNB1IP1, SNORD126, RPPH1, PARP2, TEP1, KLHL33, OSGEP, APEX1, TMEM55B, PNP, RNASE10, RNASE9, RNASE11, RNASE12, OR6S1, ANG, RNASE4, EDDM3A, EDDM3B, RNASE6, RNASE1, RNASE3, ECRP, RNASE2, METTL17, SLC39A2, NDRG2, TPPP2, RNASE13, RNASE7, RNASE8, ARHGEF40, ZNF219, TMEM253, OR5AU1, LINC00641, HNRNPC, RPGRIP1, SUPT16H, CHD8, SNORD9, SNORD8, RAB2B, TOX4…	TRIP11, NKX2-1, TCL6, VRK1, MTA1, PRKD1, SAV1, JAG2, ESR2, BCL11B, GPHN, AKT1, DPF3, NUMB, TSHR, PAX9, DIO2, EML1, IGH@, TRD@, TCL1B, ANG, MMP14, XRCC3, ZFP36L1, TCL1A, TRA@, PTPN21, NDRG2, FUT8, TRA, SEL1L, GPR68, MEG3, OTX2, LGALS3, NIN, FOXA1, TRD, SIX1, TRAF3, STRN3, IGH	hsa-mir-1201, SNORD126, mgU6-53B, mgU6-53, hsa-mir-208a, hsa-mir-208b, hsa-mir-4307, hsa-mir-3171, hsa-mir-624, hsa-mir-3172, SNORD127, hsa-mir-4308, hsa-mir-548h-1, hsa-mir-625, hsa-mir-1260, ACA65, SNORA11B, hsa-mir-3173, U93, hsa-mir-342, hsa-mir-345, hsa-mir-770, hsa-mir-493, hsa-mir-337, hsa-mir-665, hsa-mir-431, hsa-mir-433, hsa-mir-127, hsa-mir-432, hsa-mir-136, 14q(0), hsa-mir-370, 14q(I-…	S-4ETOO	S-3HXYB	chr14:20511672-107285437
UPN3	LOH		14	q32.11	q31.3	15	4390.93	1515	arr[hg19] 14q31.3q32.11(85,782,523-90,173,453) hmz	LINC00911, FLRT2, LOC283585, GALC, GPR65, LOC283587, KCNK10, SPATA7, PTPN21, ZC3H14, EML5, TTC8, FOXN3, FOXN3-AS1, FOXN3-AS2	PTPN21		S-3SDWG	S-4QFXW	chr14:85782523-90173453
UPN3	Gain	3	17	q25.3	p13.3	1373	81041.4	73347	arr[hg19] 17p13.3q25.3(525-81,041,938)x3	DOC2B, RPH3AL, LOC100506388, C17orf97, FAM101B, VPS53, FAM57A, GEMIN4, DBIL5P, GLOD4, RNMTL1, NXN, TIMM22, ABR, MIR3183, BHLHA9, TUSC5, YWHAE, CRK, MYO1C, INPP5K, PITPNA-AS1, PITPNA, SLC43A2, SCARF1, RILP, PRPF8, TLCD2, MIR22HG, MIR22, WDR81, SERPINF2, SERPINF1, SMYD4, RPA1, RTN4RL1, DPH1, OVCA2, MIR132, MIR212, HIC1, SMG6, SRR, TSR1, SNORD91B, SNORD91A, SGSM2, MNT, LOC284009, METTL16, PAFAH1B1, …	IKZF3, FAM57A, NCOR1, MAPK7, MLLT6, GAST, SHBG, SLC9A3R1, SLC4A1, PER1, STAT5B, SEPT9, AXIN2, COL1A1, KDM6B, BRCA1, ENPP7, RABEP1, ETV4, DDX5, TRAF4, GRN, MYBBP1A, KSR1, LASP1, SPECC1, IGF2BP1, TBX2, TIMP2, CDC6, HIC1, CLDN7, ELAC2, SLC16A3, CRLF3, BCAS3, RNF213, TAF15, USP6, ALOX15, RPL26, CASC3, FLCN, PRKAR1A, NF1, GRB2, ASPSCR1, SUZ12, MIR21, RAC3, PYY, GAS7, DLX4, SRSF2, XAF1, PPP1R1B, ALOX12…	hsa-mir-3183, hsa-mir-22, hsa-mir-132, hsa-mir-212, HBII-296B, HBII-296A, hsa-mir-1253, hsa-mir-195, hsa-mir-497, hsa-mir-324, ACA48, mgU6-77, U67, ACA68, hsa-mir-4314, U8, hsa-mir-744, hsa-mir-548h-3, hsa-mir-1288, U49B, U49A, HBII-135, hsa-mir-33b, U3-2, U3-2B, U3-4, U3, U3-3, hsa-mir-1180, ACA59B, U42B, mgh18S-121, U42A, Z17B, hsa-mir-451, hsa-mir-144, hsa-mir-423, hsa-mir-3184, hsa-mir-193a, …	C-5VAZU	S-4LRWR	chr17:525-81041938
UPN3	Gain	4	18	q23	p11.32	342	77877.9	66936	arr[hg19] 18p11.32q23(136,226-78,014,123)x4	USP14, THOC1, COLEC12, CETN1, CLUL1, C18orf56, TYMS, ENOSF1, YES1, ADCYAP1, LINC00470, METTL4, NDC80, CBX3P2, SMCHD1, EMILIN2, LPIN2, LOC727896, MYOM1, MYL12A, MYL12B, TGIF1, DLGAP1, DLGAP1-AS1, DLGAP1-AS3, DLGAP1-AS4, DLGAP1-AS5, C18orf42, LINC00526, LINC00667, ZBTB14, EPB41L3, LOC645355, MIR3976, TMEM200C, L3MBTL4, MIR4317, LOC100130480, ARHGAP28, LINC00668, LAMA1, LRRC30, PTPRM, LOC100192426, …	GATA6, SETBP1, DSG2, PHLPP1, SERPINB5, DCC, BCL2, SMAD2, MAPK4, SMAD4, MBD2, PTPN2, SLC39A6, ZNF521, SS18, EPB41L3, RBBP8, MALT1	hsa-mir-4317, hsa-mir-3156-2, hsa-mir-320c-1, hsa-mir-133a-1, hsa-mir-1-2, hsa-mir-320c-2, hsa-mir-302f, hsa-mir-187, hsa-mir-4318, hsa-mir-924, hsa-mir-4319, hsa-mir-1539, U58C, U58A, U58B, mgU12-22/U4-8, U91, hsa-mir-4320, ACA37, hsa-mir-122	C-7KBTZ	C-6HGFA	chr18:136226-78014123
UPN3	Gain	4	21	q22.3	q11.2	293	33090.9	33620	arr[hg19] 21q11.2q22.3(15,006,457-48,097,372)x4	POTED, C21orf15, ANKRD20A11P, LIPI, RBM11, ABCC13, HSPA13, SAMSN1, SAMSN1-AS1, LOC388813, NRIP1, USP25, LINC00478, MIR99A, MIRLET7C, MIR125B2, C21orf37, CXADR, BTG3, C21orf91-OT1, C21orf91, CHODL-AS1, CHODL, TMPRSS15, LINC00320, NCAM2, RNU6-67P, LINC00317, LINC00308, D21S2088E, LOC339622, LINC00158, MIR155HG, MIR155, LINC00515, MRPL39, JAM2, ATP5J, GABPA, APP, CYYR1, ADAMTS1, ADAMTS5, MIR4759, MI…	PTTG1IP, MIR125B2, OLIG2, TFF1, ETS2, S100B, CSTB, RUNX1, U2AF1, TFF3, NRIP1, DYRK1A, TMPRSS3, TMPRSS2, ERG, TFF2, TIAM1, ADAMTS1	hsa-mir-3118-5, hsa-mir-99a, hsa-let-7c, hsa-mir-125b-2, hsa-mir-548x, hsa-mir-155, hsa-mir-4327, ACA67, hsa-mir-802, hsa-mir-3197	C-6OPRF	C-3ELOA	chr21:15006457-48097372
UPN3	Gain	4	X	q28	p22.33	1020	155065	189818	arr[hg19] Xp22.33q28(168,546-155,233,731)x4	PLCXD1, GTPBP6, LINC00685, PPP2R3B, SHOX, CRLF2, CSF2RA, MIR3690, IL3RA, SLC25A6, ASMTL-AS1, ASMTL, P2RY8, AKAP17A, ASMT, DHRSX, ZBED1, CD99P1, LINC00102, CD99, XG, XGPY2, GYG2, ARSD, ARSE, ARSH, ARSF, CXorf28, MXRA5, PRKX, LOC389906, NLGN4X, MIR4770, VCX3A, HDHD1, MIR4767, STS, VCX, PNPLA4, MIR651, VCX2, VCX3B, KAL1, FAM9A, FAM9B, TBL1X, GPR143, SHROOM2, LOC100288814, WWC3, CLCN4, MID1, HCCS, AR…	ZRSR2, PHF6, SSX2, ARMCX1, IL3RA, ARMCX2, ZBTB33, ARMCX3, P2RY8, REPS2, TFE3, FOXP3, RHOXF2, ELF4, MIR221, BRWD3, SEPT6, FOXO4, BTK, KDM6A, RBBP7, FAM123B, AMOT, DACH2, MTCP1, Sep.06, MIR222, AR, SPANXA1, CRLF2, L1CAM, NONO, AIFM1, GATA1, DKC1, MSN, CXCR3, RPL10, BCOR, GPC3, STAG2	hsa-mir-651, hsa-mir-1308, ACA12, hsa-mir-548f-5, hsa-mir-221, hsa-mir-222, SNORA11C, hsa-mir-532, hsa-mir-188, hsa-mir-500, hsa-mir-362, hsa-mir-501, hsa-mir-500b, hsa-mir-660, hsa-mir-502, SNORA11E, SNORA11D, hsa-mir-98, hsa-let-7f-2, U107, hsa-mir-1468, hsa-mir-223, hsa-mir-421, hsa-mir-374b, hsa-mir-545, hsa-mir-374a, hsa-mir-384, hsa-mir-325, hsa-mir-4328, hsa-mir-548i-4, hsa-mir-1321, hsa-m…	C-5QGHR	C-6KTXX	chrX:168546-155233731
UPN3	Loss	1	11	q25	q25	1	6.823	20	arr[hg19] 11q25(133,051,143-133,057,966)x1	OPCML	OPCML		C-3LDXV	S-3RTEZ	chr11:133051143-133057966
UPN3	Loss	1	15	q12	q12	2	51.37	158	arr[hg19] 15q12(26,051,830-26,103,200)x1	ATP10A, MIR4715	ATP10A		S-3GFDO	C-7EWOP	chr15:26051830-26103200
UPN4	Gain	3	1	q21.1	q21.1	18	346.146	484	arr[hg19] 1q21.1(145,398,177-145,744,323)x3	LOC100288142, NBPF10, HFE2, TXNIP, POLR3GL, ANKRD34A, LIX1L, RBM8A, GNRHR2, PEX11B, ITGA10, ANKRD35, PIAS3, NUDT17, POLR3C, RNF115, CD160, PDZK1	PIAS3		C-6QWXA	C-7KCUB	chr1:145398177-145744323
UPN4	GainMosaic	2.26377	1	q23.3	q21.1	422	16214.1	14503	arr[hg19] 1q21.1q23.3(146,528,798-162,742,898)x2-3	NBPF13P, PRKAB2, PDIA3P, FMO5, CHD1L, LINC00624, BCL9, ACP6, GJA5, GJA8, GPR89B, GPR89C, PDZK1P1, NBPF24, NBPF11, NBPF8, MIR5087, FLJ39739, PPIAL4B, PPIAL4A, PPIAL4F, PPIAL4D, NBPF14, NBPF9, NBPF15, NBPF16, PPIAL4E, LOC645166, LOC388692, FCGR1C, PPIAL4C, LINC00869, LINC00623, HIST2H2BF, FCGR1A, HIST2H3D, HIST2H4B, HIST2H4A, HIST2H3A, HIST2H3C, HIST2H2AA4, HIST2H2AA3, HIST2H2BC, HIST2H2BE, HIST2H2…	S100A1, S100A7, CKS1B, SHC1, BCL9, ARHGEF2, PVRL4, S100A13, ECM1, USF1, ARNT, IGSF8, S100A8, MEF2D, MLLT11, CRTC2, SDHC, TPM3, S100A9, S100A10, S100A4, RPS27, FCGR2B, PRCC	hsa-mir-4257, hsa-mir-554, hsa-mir-190b, hsa-mir-4258, hsa-mir-92b, hsa-mir-555, ACA42, ACA26, hsa-mir-9-1, hsa-mir-765, hsa-mir-4259, hsa-mir-556	C-5XHKU	C-4HNSM	chr1:146528798-162742898
UPN4	Gain	2.26	1	q23.3	q21.1	427	16908.9	15265	arr[hg19] 1q21.1q23.3(146,528,798-163,437,734)x2-3	NBPF13P, PRKAB2, PDIA3P, FMO5, CHD1L, LINC00624, BCL9, ACP6, GJA5, GJA8, GPR89B, GPR89C, PDZK1P1, NBPF24, NBPF11, NBPF8, MIR5087, FLJ39739, PPIAL4B, PPIAL4A, PPIAL4F, PPIAL4D, NBPF14, NBPF9, NBPF15, NBPF16, PPIAL4E, LOC645166, LOC388692, FCGR1C, PPIAL4C, LINC00869, LINC00623, HIST2H2BF, FCGR1A, HIST2H3D, HIST2H4B, HIST2H4A, HIST2H3A, HIST2H3C, HIST2H2AA4, HIST2H2AA3, HIST2H2BC, HIST2H2BE, HIST2H2…	S100A1, S100A7, CKS1B, SHC1, BCL9, ARHGEF2, PVRL4, S100A13, ECM1, USF1, ARNT, IGSF8, S100A8, MEF2D, MLLT11, CRTC2, SDHC, TPM3, S100A9, S100A10, S100A4, RPS27, FCGR2B, PRCC	hsa-mir-4257, hsa-mir-554, hsa-mir-190b, hsa-mir-4258, hsa-mir-92b, hsa-mir-555, ACA42, ACA26, hsa-mir-9-1, hsa-mir-765, hsa-mir-4259, hsa-mir-556	C-5XHKU	C-7HTEQ	chr1:146528798-163437734
UPN4	Gain	2.23	1	q31.1	q23.3	193	22985.2	24988	arr[hg19] 1q23.3q31.1(164,571,097-187,556,283)x2-3	PBX1, LOC100505795, LMX1A, RXRG, LOC400794, LRRC52, MGST3, ALDH9A1, LOC440700, TMCO1, UCK2, MIR3658, FAM78B, MIR921, FMO9P, POGK, TADA1, ILDR2, MAEL, GPA33, DUSP27, POU2F1, CD247, CREG1, RCSD1, MPZL1, ADCY10, MPC2, DCAF6, GPR161, TIPRL, SFT2D2, ANKRD36BP1, TBX19, MIR557, LOC100505918, XCL2, XCL1, DPT, LINC00626, ATP1B1, NME7, BLZF1, CCDC181, SLC19A2, F5, SELP, SELL, SELE, METTL18, C1orf112, SCYL3…	SELE, RCSD1, DHX9, GPA33, PTGS2, TNN, CREG1, PLA2G4A, GAS5, TNFSF18, TPR, PRRX1, ABL2, PBX1	hsa-mir-921, hsa-mir-1255b-2, hsa-mir-557, hsa-mir-3119-2, hsa-mir-3119-1, hsa-mir-1295, hsa-mir-214, hsa-mir-3120, hsa-mir-199a-2, U81, U47, U80, U79, U78, U44, U77, U76, U75, U74, HBI-100, hsa-mir-488, hsa-mir-3121	C-4RDQJ	C-7EVAV	chr1:164571097-187556283
UPN4	GainMosaic	2.28181	1	q31.1	q23.3	192	22514.4	24316	arr[hg19] 1q23.3q31.1(164,785,817-187,300,242)x2-3	PBX1, LMX1A, RXRG, LOC400794, LRRC52, MGST3, ALDH9A1, LOC440700, TMCO1, UCK2, MIR3658, FAM78B, MIR921, FMO9P, POGK, TADA1, ILDR2, MAEL, GPA33, DUSP27, POU2F1, CD247, CREG1, RCSD1, MPZL1, ADCY10, MPC2, DCAF6, GPR161, TIPRL, SFT2D2, ANKRD36BP1, TBX19, MIR557, LOC100505918, XCL2, XCL1, DPT, LINC00626, ATP1B1, NME7, BLZF1, CCDC181, SLC19A2, F5, SELP, SELL, SELE, METTL18, C1orf112, SCYL3, KIFAP3, METT…	SELE, RCSD1, DHX9, GPA33, PTGS2, TNN, CREG1, PLA2G4A, GAS5, TNFSF18, TPR, PRRX1, ABL2, PBX1	hsa-mir-921, hsa-mir-1255b-2, hsa-mir-557, hsa-mir-3119-2, hsa-mir-3119-1, hsa-mir-1295, hsa-mir-214, hsa-mir-3120, hsa-mir-199a-2, U81, U47, U80, U79, U78, U44, U77, U76, U75, U74, HBI-100, hsa-mir-488, hsa-mir-3121	C-4ZAPB	S-4EAKG	chr1:164785817-187300242
UPN4	Gain	2.29	1	q32.3	q31.2	199	20338.2	19954	arr[hg19] 1q31.2q32.3(192,537,507-212,875,726)x2-3	RGS1, RGS13, RGS2, UCHL5, TROVE2, GLRX2, CDC73, MIR1278, B3GALT2, KCNT2, MIR4735, CFH, CFHR3, CFHR1, CFHR4, CFHR2, CFHR5, F13B, ASPM, ZBTB41, CRB1, DENND1B, C1orf53, LHX9, NEK7, ATP6V1G3, PTPRC, MIR181A1HG, MIR181B1, MIR181A1, NR5A2, LINC00862, ZNF281, KIF14, DDX59, CAMSAP2, GPR25, C1orf106, KIF21B, CACNA1S, ASCL5, TMEM9, IGFN1, PKP1, TNNT2, LAD1, TNNI1, PHLDA3, CSRP1, RPS10P7, NAV1, MIR5191, RNU…	ASPM, PTPN7, KIF14, KCNH1, ATF3, GLRX2, ADIPOR1, RGS2, TROVE2, MAPKAPK2, PTPRC, B3GALT2, CDC73	hsa-mir-1278, hsa-mir-181b-1, hsa-mir-181a-1, hsa-mir-1231, ACA63, hsa-mir-135b, hsa-mir-29c, hsa-mir-29b-2, hsa-mir-205, hsa-mir-4260, hsa-mir-3122, U98b	S-4DLMD	S-4PXIF	chr1:192537507-212875726
UPN4	GainMosaic	2.28597	1	q32.3	q31.2	190	19097.9	18635	arr[hg19] 1q31.2q32.3(193,777,851-212,875,726)x2-3	KCNT2, MIR4735, CFH, CFHR3, CFHR1, CFHR4, CFHR2, CFHR5, F13B, ASPM, ZBTB41, CRB1, DENND1B, C1orf53, LHX9, NEK7, ATP6V1G3, PTPRC, MIR181A1HG, MIR181B1, MIR181A1, NR5A2, LINC00862, ZNF281, KIF14, DDX59, CAMSAP2, GPR25, C1orf106, KIF21B, CACNA1S, ASCL5, TMEM9, IGFN1, PKP1, TNNT2, LAD1, TNNI1, PHLDA3, CSRP1, RPS10P7, NAV1, MIR5191, RNU6-79P, MIR1231, IPO9, SHISA4, LMOD1, TIMM17A, RNPEP, ELF3, GPR37L1…	ASPM, PTPN7, KIF14, KCNH1, ATF3, ADIPOR1, MAPKAPK2, PTPRC	hsa-mir-181b-1, hsa-mir-181a-1, hsa-mir-1231, ACA63, hsa-mir-135b, hsa-mir-29c, hsa-mir-29b-2, hsa-mir-205, hsa-mir-4260, hsa-mir-3122, U98b	S-3YWJV	S-4PXIF	chr1:193777851-212875726
UPN4	LOH		1	q44	q32.3	280	36212.1	11452	arr[hg19] 1q32.3q44(212,986,553-249,198,692) hmz	TATDN3, C1orf227, FLVCR1-AS1, FLVCR1, VASH2, ANGEL2, RPS6KC1, LINC00538, PROX1, SMYD2, PTPN14, CENPF, KCNK2, KCTD3, USH2A, ESRRG, GPATCH2, SPATA17, LINC00210, RRP15, LOC728463, TGFB2, LOC643723, LYPLAL1, RNU5F-1, SLC30A10, EPRS, BPNT1, IARS2, MIR215, MIR194-1, RAB3GAP2, MIR664, SNORA36B, AURKAPS1, MARK1, C1orf115, MARC2, MARC1, HLX, C1orf140, DUSP10, HHIPL2, TAF1A, MIA3, AIDA, BROX, FAM177B, DISP…	AKT3, TP53BP2, PSEN2, ENAH, FH, DUSP10, EGLN1, SMYD3, CENPF, MIXL1, ESRRG, SMYD2	hsa-mir-215, hsa-mir-194-1, hsa-mir-664, ACA36B, hsa-mir-320b-2, hsa-mir-1182, ACA14b, hsa-mir-1537, hsa-mir-3123, hsa-mir-3124	S-4FLIQ	S-3ZWLD	chr1:212986553-249198692
UPN4	LOH		2	q37.3	p25.3	1494	242760	65827	arr[hg19] 2p25.3q37.3(15,702-242,775,910) hmz	FAM110C, SH3YL1, ACP1, FAM150B, TMEM18, LOC339822, SNTG2, TPO, PXDN, MYT1L, LOC730811, TSSC1, TRAPPC12, ADI1, RNASEH1, LOC100506054, RPS7, COLEC11, ALLC, LOC100505964, LOC727982, SOX11, LOC150622, LOC400940, LINC00487, CMPK2, RSAD2, RNF144A-AS1, RNF144A, LOC100506274, LOC339788, LINC00299, ID2, KIDINS220, MBOAT2, ASAP2, ITGB1BP1, CPSF3, IAH1, ADAM17, YWHAQ, TAF1B, GRHL1, KLF11, CYS1, RRM2, C2orf4…	MTA3, EPCAM, AFF3, IL1B, ATF2, RTN4, E2F6, MYCN, TMSB10, ADAM17, HOXD11, IKZF2, SF3B1, MSH6, DIRC1, BRE, BOK, STRN, BCL2L11, PMS1, MAL, ZEB2, MSH2, PDE11A, LOXL3, DNMT3A, REL, MIR10B, HSPD1, HOXD13, ERCC3, BIN1, ATIC, DIRC3, AAMP, EML4, DDX1, CFLAR, XPO1, NLRC4, LHCGR, PTMA, ADAM23, CXCR7, CAPG, TGFBRAP1, RANBP2, PAX8, PAX3, ALK, BIRC6, INPP5D, SEPT2, FHL2, ACVR2A, TTL, MAP2, SOX11, RHOB, MERTK, …	hsa-mir-4261, ACA67B, hsa-mir-548s, hsa-mir-4262, hsa-mir-3125, hsa-mir-1301, hsa-mir-4263, HBII-316, U53, hsa-mir-558, hsa-mir-559, hsa-mir-217, hsa-mir-216a, hsa-mir-216b, U70B, hsa-mir-3126, SNORA36C, hsa-mir-1285-2, hsa-mir-4264, U94, hsa-mir-3127, HBII-289, hsa-mir-4265, hsa-mir-4266, hsa-mir-4267, hsa-mir-1302-3, hsa-mir-663b, hsa-mir-128-1, U70F, hsa-mir-933, hsa-mir-10b, hsa-mir-1246, hsa…		S-4FWRM	chr2:15702-242775910
UPN4	Gain	2.88	4	q35.2	p16.3	891	190889	153163	arr[hg19] 4p16.3q35.2(68,345-190,957,473)x2-3	ZNF595, ZNF718, ZNF876P, ZNF732, ZNF141, ABCA11P, ZNF721, PIGG, PDE6B, ATP5I, MYL5, MFSD7, PCGF3, LOC100129917, CPLX1, GAK, TMEM175, DGKQ, SLC26A1, IDUA, FGFRL1, RNF212, TMED11P, SPON2, LOC100130872, CTBP1, CTBP1-AS2, MAEA, UVSSA, CRIPAK, FAM53A, SLBP, TMEM129, TACC3, FGFR3, LETM1, WHSC1, SCARNA22, NELFA, MIR943, C4orf48, NAT8L, POLN, HAUS3, MXD4, MIR4800, ZFYVE28, LOC402160, RNF4, FAM193A, TNIP2…	TET2, RASL11B, CHIC2, PTPN13, TACC3, MAPK10, FGFR3, NR3C2, RHOH, RAP1GDS1, SYNPO2, RASSF6, WHSC1, FBXW7, SPP1, FGF2, LEF1, PDGFRA, NUDT6, AREG, EIF4E, KIT, FRYL, SORBS2, NPY1R, S100P, FAT1, FIP1L1, REST, AFF1, ING2, RCHY1, NFKB1, MAD2L1, HNRNPD	hsa-mir-571, ACA11, hsa-mir-943, hsa-mir-4274, hsa-mir-95, hsa-mir-548i-2, hsa-mir-3138, hsa-mir-572, hsa-mir-218-1, hsa-mir-573, hsa-mir-4275, hsa-mir-1255b-1, hsa-mir-574, HBI-6, hsa-mir-1269, hsa-mir-575, hsa-mir-1255a, hsa-mir-576, hsa-mir-297, hsa-mir-367, hsa-mir-302d, hsa-mir-302a, hsa-mir-302c, hsa-mir-302b, hsa-mir-1243, hsa-mir-577, hsa-mir-1973, ACA24, hsa-mir-2054, hsa-mir-3139, hsa-m…		C-7HDOD	chr4:68345-190957473
UPN4	LOH		4	p11	p15.2	91	24822.4	6671	arr[hg19] 4p15.2p11(24,266,741-49,089,181) hmz	MIR573, DHX15, SOD3, CCDC149, LGI2, SEPSECS, LOC285540, PI4K2B, ZCCHC4, ANAPC4, SLC34A2, SEL1L3, SMIM20, RBPJ, CCKAR, TBC1D19, STIM2, MIR4275, PCDH7, ARAP2, DTHD1, MIR4801, KIAA1239, C4orf19, RELL1, PGM2, TBC1D1, PTTG2, FLJ13197, KLF3, TLR10, TLR1, TLR6, FAM114A1, MIR574, TMEM156, KLHL5, WDR19, RFC1, KLB, RPL9, LIAS, LOC401127, UGDH, UGDH-AS1, SMIM14, UBE2K, PDS5A, LOC344967, N4BP2, RHOH, CHRNA9,…	RHOH, FRYL	hsa-mir-573, hsa-mir-4275, hsa-mir-1255b-1, hsa-mir-574	S-4MHDW	S-3MXPL	chr4:24266741-49089181
UPN4	LOH		4	q13.1	q11	45	8060.18	2165	arr[hg19] 4q11q13.1(52,686,799-60,746,980) hmz	DCUN1D4, LRRC66, SGCB, SPATA18, USP46, DANCR, MIR4449, SNORA26, ERVMER34-1, LOC152578, RASL11B, SCFD2, FIP1L1, LNX1, LNX1-AS1, LNX1-AS2, RPL21P44, CHIC2, GSX2, PDGFRA, KIT, KDR, SRD5A3, SRD5A3-AS1, TMEM165, CLOCK, PDCL2, NMU, LOC644145, EXOC1, CEP135, KIAA1211, AASDH, PPAT, PAICS, SRP72, ARL9, THEGL, HOPX, SPINK2, REST, NOA1, POLR2B, IGFBP7, LOC255130	RASL11B, CHIC2, PDGFRA, KIT, FIP1L1, REST	HBI-6	S-4DTMI	S-3TWBX	chr4:52686799-60746980
UPN4	Gain	2.92	6	q27	p25.3	1220	170763	155053	arr[hg19] 6p25.3q27(156,974-170,919,482)x2-3	DUSP22, IRF4, EXOC2, HUS1B, LOC285768, FOXQ1, FOXF2, FOXC1, GMDS, LOC100508120, C6orf195, MYLK4, WRNIP1, SERPINB1, MIR4645, MGC39372, SERPINB9, SERPINB6, DKFZP686I15217, NQO2, HTATSF1P2, RIPK1, BPHL, TUBB2A, LOC100507194, TUBB2B, PSMG4, SLC22A23, PXDC1, FAM50B, PRPF4B, FAM217A, C6orf201, ECI2, CDYL, RPP40, PPP1R3G, LYRM4, MIR3691, FARS2, NRN1, F13A1, LY86-AS1, LY86, RREB1, SSR1, CAGE1, RIOK1, DSP…	HIST1H4F, PPARD, TFAP2A, IRF4, IGF2R, CD109, LIN28B, EPHA7, CEP85L, DDX43, HIST1H3F, POLH, hsa-mir-548a-2, ID4, ZFAND3, HMGA1, CDKN1A, HFE, EEF1A1, BACH2, JARID2, CTGF, MLLT4, DAXX, BAK1, AGER, CCNC, THBS2, MYB, CASP8AP2 , CITED2, DEK, CAGE1, RUNX2, NFKBIE, SESN1, MAPK13, FOXO3, RNASET2, FGFR1OP, TFEB, WISP3, IER3, LATS1, TNF, AHI1, HIST1H4G, ARMC2, CCND3, MAP3K7, SOX4, HDAC2, E2F3, PLAGL1, ECT2L…	hsa-mir-548a-1, hsa-mir-3143, U32B, hsa-mir-877, U83, U84, ACA38, U48, U52, hsa-mir-1236, hsa-mir-219-1, hsa-mir-1275, hsa-mir-586, hsa-mir-206, hsa-mir-133b, hsa-mir-548u, hsa-mir-30c-2, hsa-mir-30a, hsa-mir-4282, U50, U50B, hsa-mir-2113, hsa-mir-587, hsa-mir-548b, hsa-mir-3144, hsa-mir-588, U101, HBII-429, ACA33, hsa-mir-548a-2, hsa-mir-3145, hsa-mir-1273c, hsa-mir-1202, ACA20, ACA29, hsa-mir-1…		C-5ELRJ	chr6:156974-170919482
UPN4	Gain	2.89	7	q36.3	p22.3	1140	159076	153640	arr[hg19] 7p22.3q36.3(43,360-159,119,707)x2-3	FAM20C, LOC100288524, LOC442497, PDGFA, FLJ44511, PRKAR1B, HEATR2, SUN1, GET4, ADAP1, COX19, CYP2W1, C7orf50, MIR339, GPR146, GPER, ZFAND2A, UNCX, MICALL2, INTS1, MAFK, TMEM184A, PSMG3, PSMG3-AS1, TFAMP1, ELFN1, MAD1L1, MIR4655, FTSJ2, NUDT1, SNX8, EIF3B, CHST12, LFNG, MIR4648, BRAT1, IQCE, TTYH3, AMZ1, GNA12, CARD11, SDK1, FOXK1, AP5Z1, MIR4656, RADIL, PAPOLB, MMD2, RNF216P1, RBAK, RBAK-RBAKDN, …	HUS1, TRB, EZH2, GRB10, HBP1, SHH, GATAD1, NRF1, ZC3HAV1, TWIST1, SPAM1, EZH2, CREB3L2, EZH2, AKAP9, MET, EZH2, RELN, NRCAM, TRB@, TRIM24, POM121, IL6, DDC, ABCB1, EPHA1, CDK6, IKZF1, THSD7A, POT1, TRPV6, JAZF1, CLDN4, STEAP2, MNX1, POU6F2, LIMK1, DMTF1, SFRP4, PEX1, PEG10, POM121C, HIP1, HOXA13, HIPK2, BRAF, TRG@, ACTB, HOXA11, COL1A2, BCL7B, HGF, STEAP1, CYP2W1, ASNS, ERVW-1, GPER, TAC1, ELN, H…	hsa-mir-339, hsa-mir-589, hsa-mir-1302-6, hsa-mir-3146, hsa-mir-1183, HBII-336, hsa-mir-148a, hsa-mir-196b, hsa-mir-550-1, hsa-mir-550-2, hsa-mir-548n, hsa-mir-1200, ACA9, ACA5, ACA5c, ACA5b, ACA15, hsa-mir-4283-1, hsa-mir-3147, hsa-mir-4283-2, ACA22, hsa-mir-4284, hsa-mir-590, ACA14a, hsa-mir-1285-1, hsa-mir-653, hsa-mir-489, hsa-mir-591, hsa-mir-25, hsa-mir-93, hsa-mir-106b, hsa-mir-4285, hsa-m…		C-7IIDC	chr7:43360-159119707
UPN4	Gain	3	8	q24.3	p23.3	837	146138	125254	arr[hg19] 8p23.3q24.3(158,048-146,295,771)x3	RPL23AP53, ZNF596, FAM87A, FBXO25, TDRP, ERICH1, ERICH1-AS1, LOC286083, DLGAP2, CLN8, MIR596, ARHGEF10, KBTBD11, MYOM2, CSMD1, LOC100287015, MCPH1, ANGPT2, AGPAT5, MIR4659A, MIR4659B, XKR5, LOC100652791, DEFB1, DEFA6, DEFA4, DEFA8P, DEFA9P, DEFA10P, DEFA1B, DEFA1, DEFT1P2, DEFT1P, DEFA3, DEFA11P, DEFA5, LINC00965, FAM66B, DEFB109P1B, USP17L1P, USP17L4, ZNF705G, DEFB4B, DEFB103B, DEFB103A, SPAG11B…	PLAG1, ENPP2, KAT6A, CTHRC1, SNAI2, MCPH1, NAT2, TACC1, BAALC, CYP7A1, CLU, MYBL1, NKX3-1, RUNX1T1, IDO1, CYP7B1, CTSB, NCOA2, RECQL4, RHOBTB2, RAD21, BOP1, COX6C, TP53INP1, NAT1, TOX, EIF4EBP1, GGH, EXT1, DEFB1, PTK2B, TPD52, KIAA1967, IDO2, WHSC1L1, WWP1, MYC, PAG1, FGFR1, PCM1, PTK2, NDRG1, DLC1, PSCA, LOXL2, ADAM9, ASH2L, RNF139, MTUS1, NBN, HAS2, MAFA, TNKS, WRN, TNFRSF11B, EBAG9	hsa-mir-596, hsa-mir-548i-3, hsa-mir-597, hsa-mir-124-1, hsa-mir-4286, hsa-mir-1322, hsa-mir-598, hsa-mir-383, hsa-mir-548v, hsa-mir-320a, hsa-mir-548h-4, hsa-mir-4287, hsa-mir-4288, hsa-mir-3148, U13, hsa-mir-486, U54, hsa-mir-124-2, HBII-276, hsa-mir-2052, hsa-mir-3149, hsa-mir-3150, U72, hsa-mir-599, hsa-mir-875, hsa-mir-1273, hsa-mir-3151, hsa-mir-548a-3, hsa-mir-2053, hsa-mir-548d-1, hsa-mir…		C-3WEHE	chr8:158048-146295771
UPN4	Gain	2.93	9	q34.3	p24.3	961	140817	100046	arr[hg19] 9p24.3q34.3(203,861-141,020,389)x2-3	C9orf66, DOCK8, KANK1, DMRT1, DMRT3, DMRT2, SMARCA2, FLJ35024, VLDLR, KCNV2, KIAA0020, RFX3, GLIS3, GLIS3-AS1, SLC1A1, SPATA6L, PPAPDC2, CDC37L1, AK3, RCL1, MIR101-2, JAK2, INSL6, INSL4, RLN2, RLN1, PLGRKT, CD274, PDCD1LG2, KIAA1432, ERMP1, MLANA, KIAA2026, MIR4665, RANBP6, IL33, TPD52L3, UHRF2, GLDC, KDM4C, C9orf123, PTPRD, TYRP1, LURAP1L, MPDZ, FLJ41200, LINC00583, NFIB, ZDHHC21, CER1, FREM1, L…	CDKN2A, MLLT3 (AF9), KDM4C, PRRX2, MIR126, SH3GL2, PPP2R4, SIGMAR1, HNRNPK, JAK2, MLLT3, PAEP, MIR7-1, PAX5, TEK, RLN2, DAB2IP, FANCG, SEMA4D, TNC, GFI1B, CCL27, CDK20, FNBP1, STOML2, DAPK1, NUP214, TAL2, RAPGEF1, PSIP1, MTAP, ANXA1, FAM22F, PTPRD, FOXE1, CDKN2B, CTSL1, GNAQ, WNK2, PTCH1, ALDOB, XPA, NOTCH1, IFNA1, TJP2, SYK, SET, RMRP, TXN, KLF4, NTRK2, NR4A3, HSPA5, ROR2, CNTRL, TNFSF15, CKS2, …	hsa-mir-101-2, hsa-mir-3152, U92, hsa-mir-491, hsa-mir-31, hsa-mir-876, hsa-mir-873, SNORD121B, SNORD121A, hsa-mir-1299, hsa-mir-204, hsa-mir-7-1, hsa-mir-4289, hsa-mir-3153, hsa-mir-4290, SNORA84, hsa-mir-4291, hsa-let-7a-1, hsa-let-7f-1, hsa-let-7d, hsa-mir-2278, hsa-mir-23b, hsa-mir-27b, hsa-mir-3074, hsa-mir-24-1, hsa-mir-1302-8, hsa-mir-32, hsa-mir-455, U70C, hsa-mir-147, HBII-295, hsa-mir-6…		C-5LURI	chr9:203861-141020389
UPN4	Gain	3	10	q26.3	p15.3	921	135327	133229	arr[hg19] 10p15.3q26.3(100,026-135,427,143)x3	ZMYND11, DIP2C, MIR5699, PRR26, LARP4B, GTPBP4, IDI2, IDI2-AS1, IDI1, WDR37, LINC00200, ADARB2, ADARB2-AS1, LINC00700, LINC00701, PFKP, PITRM1, PITRM1-AS1, KLF6, LINC00704, LINC00705, AKR1E2, AKR1C6P, AKR1C1, AKR1C2, AKR1C3, AKR1CL1, AKR1C4, UCN3, TUBAL3, NET1, CALML5, CALML3, ASB13, FAM208B, GDI2, ANKRD16, FBXO18, IL15RA, IL2RA, RBM17, PFKFB3, MIR3155A, MIR3155B, LOC399715, PRKCQ, PRKCQ-AS1, LIN…	LOXL4, EIF3A, PDCD4, SIRT1, RET, ZMIZ1, ADD3, AKR1C3, LGI1, MLLT10, FGF8, MRC1, PAX2, BAG3, DMBT1, BNIP3, BLNK, PTEN, RHOBTB1, KAT6B, TLX1, AIFM2, PSAP, LDB1, MAPK8, NT5C2, NET1, ARID5B, ERCC6, HTRA1, BMI1, NCOA4, TET1, CCDC6, MXI1, DKK1, KLF6, ABI1, SNCG, BTRC, NFKB2, GATA3, ALOX5, FGFR2, ADAM12	hsa-mir-3155, hsa-mir-548q, hsa-mir-4293, hsa-mir-1265, hsa-mir-511-1, hsa-mir-511-2, hsa-mir-1915, hsa-mir-603, hsa-mir-604, hsa-mir-938, hsa-mir-3156-1, hsa-mir-4294, hsa-mir-605, hsa-mir-548f-1, hsa-mir-1296, HBII-419, hsa-mir-1254, hsa-mir-606, hsa-mir-346, hsa-mir-107, hsa-mir-3157, hsa-mir-607, hsa-mir-1287, U108, hsa-mir-608, hsa-mir-3158-1, hsa-mir-3158-2, hsa-mir-146b, hsa-mir-1307, hsa-…		C-5DPFD	chr10:100026-135427143
UPN4	LOH		10	p12.2	p12.31	23	3038.02	721	arr[hg19] 10p12.31p12.2(21,240,531-24,278,555) hmz	NEBL, C10orf113, NEBL-AS1, C10orf114, MIR1915, SKIDA1, MLLT10, DNAJC1, EBLN1, LOC100130992, COMMD3, COMMD3-BMI1, BMI1, SPAG6, LOC100499489, PIP4K2A, ARMC3, MSRB2, PTF1A, C10orf115, C10orf67, OTUD1, KIAA1217	MLLT10, BMI1	hsa-mir-1915	S-3EGIT	S-4FUDH	chr10:21240531-24278555
UPN4	LOH		10	q11.22	q11.21	35	3623.86	255	arr[hg19] 10q11.21q11.22(46,094,625-49,718,480) hmz	ZFAND4, FAM21C, AGAP4, PTPN20B, PTPN20A, BMS1P1, BMS1P5, GLUD1P7, FAM35BP, SYT15, GPRIN2, NPY4R, LINC00842, HNRNPA1P33, ANXA8, ANXA8L1, FAM25C, FAM25G, FAM25B, AGAP9, BMS1P2, BMS1P6, FAM35DP, ANXA8L2, FAM21B, CTSL1P2, ZNF488, RBP3, GDF2, GDF10, FRMPD2P1, LOC399753, FRMPD2, MAPK8, ARHGAP22	MAPK8		S-3CCSA	S-3OHQK	chr10:46094625-49718480
UPN4	LOH		13	q34	q11	459	95656.9	27733	arr[hg19] 13q11q34(19,438,806-115,095,705) hmz	ANKRD20A9P, LINC00442, RNU6-52P, TUBA3C, ANKRD26P3, LINC00421, TPTE2, MPHOSPH8, PSPC1, ZMYM5, ZMYM2, GJA3, GJB2, GJB6, CRYL1, MIR4499, IFT88, IL17D, N6AMT2, XPO4, LATS2, SAP18, SKA3, MRP63, MIPEPP3, ZDHHC20, MICU2, FGF9, LINC00424, BASP1P1, SGCG, SACS, SACS-AS1, LINC00327, TNFRSF19, MIPEP, C1QTNF9B-AS1, C1QTNF9B, ANKRD20A19P, SPATA13, MIR2276, SPATA13-AS1, C1QTNF9, PARP4, TPTE2P6, ATP12A, RNF17, …	STARD13, ELF1, LATS2, DLEU2, ST13P4, PDX1, RB1, hsa-mir-15a, FOXO1, TRIM13, CDX2, INTS6, ERCC5, LCP1, DACH1, KCNRG, ZMYM2, DGKH, KLF5, HSPH1, OLFM4, PAN3, GPC5, LHFP, SERP2, DLEU1, BRCA2, DLEU7, POU4F1, hsa-mir-16-1, FLT3, RAP2A	hsa-mir-2276, U102, ACA27, hsa-mir-4305, hsa-mir-320d-1, hsa-mir-621, hsa-mir-3168, ACA31, hsa-mir-16-1, hsa-mir-15a, hsa-mir-759, hsa-mir-1297, hsa-mir-3169, hsa-mir-622, hsa-mir-17, hsa-mir-18a, hsa-mir-19a, hsa-mir-20a, hsa-mir-19b-1, hsa-mir-92a-1, hsa-mir-3170, hsa-mir-623, hsa-mir-4306, hsa-mir-1267		S-4DINU	chr13:19438806-115095705
UPN4	Gain	4	14	q32.33	q11.2	769	86730.3	85630	arr[hg19] 14q11.2q32.33(20,555,119-107,285,437)x4	OR4K17, OR4N5, OR11G2, OR11H6, OR11H4, TTC5, CCNB1IP1, SNORD126, RPPH1, PARP2, TEP1, KLHL33, OSGEP, APEX1, TMEM55B, PNP, RNASE10, RNASE9, RNASE11, RNASE12, OR6S1, ANG, RNASE4, EDDM3A, EDDM3B, RNASE6, RNASE1, RNASE3, ECRP, RNASE2, METTL17, SLC39A2, NDRG2, TPPP2, RNASE13, RNASE7, RNASE8, ARHGEF40, ZNF219, TMEM253, OR5AU1, LINC00641, HNRNPC, RPGRIP1, SUPT16H, CHD8, SNORD9, SNORD8, RAB2B, TOX4, METTL…	TRIP11, NKX2-1, TCL6, VRK1, MTA1, PRKD1, SAV1, JAG2, ESR2, BCL11B, GPHN, AKT1, DPF3, NUMB, TSHR, PAX9, DIO2, EML1, IGH@, TRD@, TCL1B, ANG, MMP14, XRCC3, ZFP36L1, TCL1A, TRA@, PTPN21, NDRG2, FUT8, TRA, SEL1L, GPR68, MEG3, OTX2, LGALS3, NIN, FOXA1, TRD, SIX1, TRAF3, STRN3, IGH	hsa-mir-1201, SNORD126, mgU6-53B, mgU6-53, hsa-mir-208a, hsa-mir-208b, hsa-mir-4307, hsa-mir-3171, hsa-mir-624, hsa-mir-3172, SNORD127, hsa-mir-4308, hsa-mir-548h-1, hsa-mir-625, hsa-mir-1260, ACA65, SNORA11B, hsa-mir-3173, U93, hsa-mir-342, hsa-mir-345, hsa-mir-770, hsa-mir-493, hsa-mir-337, hsa-mir-665, hsa-mir-431, hsa-mir-433, hsa-mir-127, hsa-mir-432, hsa-mir-136, 14q(0), hsa-mir-370, 14q(I-…		S-3HXYB	chr14:20555119-107285437
UPN4	LOH		15	q26.3	q11.2	807	79676.7	24981	arr[hg19] 15q11.2q26.3(22,752,398-102,429,049) hmz	TUBGCP5, CYFIP1, NIPA2, NIPA1, LOC283683, WHAMMP3, GOLGA8I, HERC2P2, HERC2P7, GOLGA8EP, LOC440243, GOLGA8S, MIR4508, MKRN3, MAGEL2, NDN, PWRN2, PWRN1, NPAP1, SNRPN, SNURF, SNORD107, PWARSN, PWAR5, SNORD64, SNORD108, SNORD109A, SNORD109B, SNORD116-1, SNORD116-2, SNORD116-9, SNORD116-3, SNORD116-4, SNORD116-7, SNORD116-5, SNORD116-6, SNORD116-8, SNORD116-10, SNORD116-11, SNORD116-12, SNORD116-13, S…	C15orf55, LTK, PML, ITPKA, BLM, ATP10A, BMF, CTSH, SPINT1, BUB1B, NEIL1, MAPK6, PKM2, RASGRF1, GCNT3, PLCB2, IGF1R, KIAA0101, SPRED1, COPS2, TCF12, SHC4, GOLGA6A, NTRK3, ITGA11, UBE3A, TRPM1, TYRO3, hsa-mir-626, THBS1, CASC5, IDH2, ADAM10	HBII-436, HBII-13, HBII-437, HBII-438A, HBII-85-1, HBII-85-2, HBII-85-3, HBII-85-4, HBII-85-5, HBII-85-6, HBII-85-7, HBII-85-8, HBII-85-9, HBII-85-10, HBII-85-11, HBII-85-12, HBII-85-13, HBII-85-14, HBII-85-15, HBII-85-16, HBII-85-17, HBII-85-18, HBII-85-19, HBII-85-20, HBII-85-21, HBII-85-22, HBII-85-23, HBII-85-24, HBII-85-25, HBII-85-26, HBII-85-27, HBII-85-28, HBII-85-29, HBII-52-1, HBII-52-2…		S-3ERSU	chr15:22752398-102429049
UPN4	Gain	3	17	q25.3	p13.3	1373	81041.4	73347	arr[hg19] 17p13.3q25.3(525-81,041,938)x3	DOC2B, RPH3AL, LOC100506388, C17orf97, FAM101B, VPS53, FAM57A, GEMIN4, DBIL5P, GLOD4, RNMTL1, NXN, TIMM22, ABR, MIR3183, BHLHA9, TUSC5, YWHAE, CRK, MYO1C, INPP5K, PITPNA-AS1, PITPNA, SLC43A2, SCARF1, RILP, PRPF8, TLCD2, MIR22HG, MIR22, WDR81, SERPINF2, SERPINF1, SMYD4, RPA1, RTN4RL1, DPH1, OVCA2, MIR132, MIR212, HIC1, SMG6, SRR, TSR1, SNORD91B, SNORD91A, SGSM2, MNT, LOC284009, METTL16, PAFAH1B1, …	IKZF3, FAM57A, NCOR1, MAPK7, MLLT6, GAST, SHBG, SLC9A3R1, SLC4A1, PER1, STAT5B, SEPT9, AXIN2, COL1A1, KDM6B, BRCA1, ENPP7, RABEP1, ETV4, DDX5, TRAF4, GRN, MYBBP1A, KSR1, LASP1, SPECC1, IGF2BP1, TBX2, TIMP2, CDC6, HIC1, CLDN7, ELAC2, SLC16A3, CRLF3, BCAS3, RNF213, TAF15, USP6, ALOX15, RPL26, CASC3, FLCN, PRKAR1A, NF1, GRB2, ASPSCR1, SUZ12, MIR21, RAC3, PYY, GAS7, DLX4, SRSF2, XAF1, PPP1R1B, ALOX12…	hsa-mir-3183, hsa-mir-22, hsa-mir-132, hsa-mir-212, HBII-296B, HBII-296A, hsa-mir-1253, hsa-mir-195, hsa-mir-497, hsa-mir-324, ACA48, mgU6-77, U67, ACA68, hsa-mir-4314, U8, hsa-mir-744, hsa-mir-548h-3, hsa-mir-1288, U49B, U49A, HBII-135, hsa-mir-33b, U3-2, U3-2B, U3-4, U3, U3-3, hsa-mir-1180, ACA59B, U42B, mgh18S-121, U42A, Z17B, hsa-mir-451, hsa-mir-144, hsa-mir-423, hsa-mir-3184, hsa-mir-193a, …		S-4LRWR	chr17:525-81041938
UPN4	Gain	2.92	18	q23	p11.32	342	77877.9	66936	arr[hg19] 18p11.32q23(136,226-78,014,123)x2-3	USP14, THOC1, COLEC12, CETN1, CLUL1, C18orf56, TYMS, ENOSF1, YES1, ADCYAP1, LINC00470, METTL4, NDC80, CBX3P2, SMCHD1, EMILIN2, LPIN2, LOC727896, MYOM1, MYL12A, MYL12B, TGIF1, DLGAP1, DLGAP1-AS1, DLGAP1-AS3, DLGAP1-AS4, DLGAP1-AS5, C18orf42, LINC00526, LINC00667, ZBTB14, EPB41L3, LOC645355, MIR3976, TMEM200C, L3MBTL4, MIR4317, LOC100130480, ARHGAP28, LINC00668, LAMA1, LRRC30, PTPRM, LOC100192426, …	GATA6, SETBP1, DSG2, PHLPP1, SERPINB5, DCC, BCL2, SMAD2, MAPK4, SMAD4, MBD2, PTPN2, SLC39A6, ZNF521, SS18, EPB41L3, RBBP8, MALT1	hsa-mir-4317, hsa-mir-3156-2, hsa-mir-320c-1, hsa-mir-133a-1, hsa-mir-1-2, hsa-mir-320c-2, hsa-mir-302f, hsa-mir-187, hsa-mir-4318, hsa-mir-924, hsa-mir-4319, hsa-mir-1539, U58C, U58A, U58B, mgU12-22/U4-8, U91, hsa-mir-4320, ACA37, hsa-mir-122		C-6HGFA	chr18:136226-78014123
UPN4	Gain	4	21	q22.3	q11.2	293	33090.9	33620	arr[hg19] 21q11.2q22.3(15,006,457-48,097,372)x4	POTED, C21orf15, ANKRD20A11P, LIPI, RBM11, ABCC13, HSPA13, SAMSN1, SAMSN1-AS1, LOC388813, NRIP1, USP25, LINC00478, MIR99A, MIRLET7C, MIR125B2, C21orf37, CXADR, BTG3, C21orf91-OT1, C21orf91, CHODL-AS1, CHODL, TMPRSS15, LINC00320, NCAM2, RNU6-67P, LINC00317, LINC00308, D21S2088E, LOC339622, LINC00158, MIR155HG, MIR155, LINC00515, MRPL39, JAM2, ATP5J, GABPA, APP, CYYR1, ADAMTS1, ADAMTS5, MIR4759, MI…	PTTG1IP, MIR125B2, OLIG2, TFF1, ETS2, S100B, CSTB, RUNX1, U2AF1, TFF3, NRIP1, DYRK1A, TMPRSS3, TMPRSS2, ERG, TFF2, TIAM1, ADAMTS1	hsa-mir-3118-5, hsa-mir-99a, hsa-let-7c, hsa-mir-125b-2, hsa-mir-548x, hsa-mir-155, hsa-mir-4327, ACA67, hsa-mir-802, hsa-mir-3197	C-6OPRF	C-3ELOA	chr21:15006457-48097372
UPN4	Gain	2.92	22	q13.33	q11.1	544	34308.9	38296	arr[hg19] 22q11.1q13.33(16,888,899-51,197,838)x2-3	CCT8L2, TPTEP1, ANKRD62P1-PARP4P3, XKR3, HSFY1P1, GAB4, CECR7, IL17RA, CECR6, CECR5, CECR5-AS1, CECR1, CECR3, CECR2, SLC25A18, ATP6V1E1, BCL2L13, BID, MIR3198-1, LINC00528, MICAL3, MIR648, FLJ41941, PEX26, TUBA8, USP18, GGT3P, DGCR6, PRODH, DGCR5, DGCR9, DGCR10, DGCR2, DGCR11, DGCR14, TSSK2, GSC2, SLC25A1, CLTCL1, HIRA, MRPL40, C22orf39, UFD1L, CDC45, CLDN5, LINC00895, SEPT5, SEPT5-GP1BB, GP1BB, …	IGL@, BCR, PARVB, NF2, MN1, CLTCL1, MYH9, MKL1, XRCC6, MMP11, FBLN1, CHEK2, SMARCB1, IGLL1, RBX1, SEPT5, MCM5, EWSR1, MIF, TYMP, ATF4, Sep.05, RAC2, MAPK1, VPREB1, SOX10, PDGFB, MAPK12, IL2RB, EP300, BRD1	hsa-mir-3198, hsa-mir-648, hsa-mir-185, hsa-mir-1306, hsa-mir-1286, hsa-mir-649, hsa-mir-301b, hsa-mir-130b, hsa-mir-650, hsa-mir-548j, hsa-mir-3199-1, hsa-mir-3199-2, SNORD125, hsa-mir-3200, hsa-mir-658, hsa-mir-659, U83B, U83A, U43, hsa-mir-1281, hsa-mir-33a, hsa-mir-1249, hsa-let-7a-3, hsa-let-7b, hsa-mir-3201		C-4WMOA	chr22:16888899-51197838
UPN4	Gain	4	X	q28	p22.33	1020	155032	189786	arr[hg19] Xp22.33q28(201,725-155,233,731)x4	PLCXD1, GTPBP6, LINC00685, PPP2R3B, SHOX, CRLF2, CSF2RA, MIR3690, IL3RA, SLC25A6, ASMTL-AS1, ASMTL, P2RY8, AKAP17A, ASMT, DHRSX, ZBED1, CD99P1, LINC00102, CD99, XG, XGPY2, GYG2, ARSD, ARSE, ARSH, ARSF, CXorf28, MXRA5, PRKX, LOC389906, NLGN4X, MIR4770, VCX3A, HDHD1, MIR4767, STS, VCX, PNPLA4, MIR651, VCX2, VCX3B, KAL1, FAM9A, FAM9B, TBL1X, GPR143, SHROOM2, LOC100288814, WWC3, CLCN4, MID1, HCCS, AR…	ZRSR2, PHF6, SSX2, ARMCX1, IL3RA, ARMCX2, ZBTB33, ARMCX3, P2RY8, REPS2, TFE3, FOXP3, RHOXF2, ELF4, MIR221, BRWD3, SEPT6, FOXO4, BTK, KDM6A, RBBP7, FAM123B, AMOT, DACH2, MTCP1, Sep.06, MIR222, AR, SPANXA1, CRLF2, L1CAM, NONO, AIFM1, GATA1, DKC1, MSN, CXCR3, RPL10, BCOR, GPC3, STAG2	hsa-mir-651, hsa-mir-1308, ACA12, hsa-mir-548f-5, hsa-mir-221, hsa-mir-222, SNORA11C, hsa-mir-532, hsa-mir-188, hsa-mir-500, hsa-mir-362, hsa-mir-501, hsa-mir-500b, hsa-mir-660, hsa-mir-502, SNORA11E, SNORA11D, hsa-mir-98, hsa-let-7f-2, U107, hsa-mir-1468, hsa-mir-223, hsa-mir-421, hsa-mir-374b, hsa-mir-545, hsa-mir-374a, hsa-mir-384, hsa-mir-325, hsa-mir-4328, hsa-mir-548i-4, hsa-mir-1321, hsa-m…		C-6KTXX	chrX:201725-155233731
UPN4	Gain	2.26	1	p36.32	p36.33	91	3267.97	2559	arr[hg19] 1p36.33p36.32(849,466-4,117,432)x2-3	LOC100130417, SAMD11, NOC2L, KLHL17, PLEKHN1, C1orf170, HES4, ISG15, AGRN, RNF223, C1orf159, LOC254099, MIR200B, MIR200A, MIR429, TTLL10, TNFRSF18, TNFRSF4, SDF4, B3GALT6, FAM132A, UBE2J2, SCNN1D, ACAP3, PUSL1, CPSF3L, GLTPD1, TAS1R3, DVL1, MXRA8, AURKAIP1, CCNL2, LOC148413, MRPL20, ANKRD65, TMEM88B, VWA1, ATAD3C, ATAD3B, ATAD3A, TMEM240, SSU72, C1orf233, MIB2, MMP23B, MMP23A, CDK11B, SLC35E2B, C…	DVL1, MIB2, PRDM16	hsa-mir-200b, hsa-mir-200a, hsa-mir-429, hsa-mir-4251, hsa-mir-551a	C-7SARK	C-5WMUU	chr1:849466-4117432
UPN4	Gain	3	5	q22.2	q22.2	1	1.121	35	arr[hg19] 5q22.2(112,166,095-112,167,216)x3	APC	APC		C-6MCUY	C-4SATH	chr5:112166095-112167216
UPN5	Gain	2.5	5	p12	p15.33	184	41591	44165.6	arr[hg19] 5p15.33p12(113,576-44,279,163)x2-3	PLEKHG4B, LRRC14B, CCDC127, SDHA, PDCD6, AHRR, C5orf55, EXOC3, PP7080, SLC9A3, MIR4456, LOC100996325, CEP72, TPPP, ZDHHC11, BRD9, TRIP13, LOC100506688, NKD2, SLC12A7, MIR4635, SLC6A19, SLC6A18, TERT, MIR4457, CLPTM1L, SLC6A3, LPCAT1, SDHAP3, LOC728613, MIR4277, MRPL36, NDUFS6, IRX4, IRX2, C5orf38, LOC285577, IRX1, LOC340094, ADAMTS16, KIAA0947, FLJ33360, MED10, UBE2QL1, LOC255167, NSUN2, SRD5A1, …	DAB2, SEPP1, IL7R, PDCD6, LIFR, TRIO, PRLR	hsa-mir-4277, hsa-mir-4278, SNORD123, hsa-mir-887, hsa-mir-4279, hsa-mir-579, hsa-mir-580, HBII-240, hsa-mir-1274a	S-3RLNJ	S-4OGNW	chr5:113576-44279163
UPN5	Gain	2.48231	X	q28	p22.33	1020	189818	155065	arr[hg19] Xp22.33q28(168,546-155,233,731)x2-3	PLCXD1, GTPBP6, LINC00685, PPP2R3B, SHOX, CRLF2, CSF2RA, MIR3690, IL3RA, SLC25A6, ASMTL-AS1, ASMTL, P2RY8, AKAP17A, ASMT, DHRSX, ZBED1, CD99P1, LINC00102, CD99, XG, XGPY2, GYG2, ARSD, ARSE, ARSH, ARSF, CXorf28, MXRA5, PRKX, LOC389906, NLGN4X, MIR4770, VCX3A, HDHD1, MIR4767, STS, VCX, PNPLA4, MIR651, VCX2, VCX3B, KAL1, FAM9A, FAM9B, TBL1X, GPR143, SHROOM2, LOC100288814, WWC3, CLCN4, MID1, HCCS, AR…	DKC1, STAG2, MSN, ARMCX3, GPC3, AIFM1, IL3RA, TFE3, CXCR3, P2RY8, ZRSR2, FOXO4, SPANXA1, AMOT, BCOR, AR, MIR222, ZBTB33, RPL10, L1CAM, REPS2, FOXP3, BTK, MTCP1, PHF6, CRLF2, SSX2, ARMCX2, MIR221, SEPT6, RHOXF2, Sep.06, DACH2, NONO, GATA1, KDM6A, ELF4, RBBP7, FAM123B, BRWD3, ARMCX1	hsa-mir-651, hsa-mir-1308, ACA12, hsa-mir-548f-5, hsa-mir-221, hsa-mir-222, SNORA11C, hsa-mir-532, hsa-mir-188, hsa-mir-500, hsa-mir-362, hsa-mir-501, hsa-mir-500b, hsa-mir-660, hsa-mir-502, SNORA11E, SNORA11D, hsa-mir-98, hsa-let-7f-2, U107, hsa-mir-1468, hsa-mir-223, hsa-mir-421, hsa-mir-374b, hsa-mir-545, hsa-mir-374a, hsa-mir-384, hsa-mir-325, hsa-mir-4328, hsa-mir-548i-4, hsa-mir-1321, hsa-m…	C-5QGHR	C-6KTXX	chrX:168546-155233731
UPN5	Gain	2.42522	1	q44	q21.1	1127	103808	103848	arr[hg19] 1q21.1q44(145,376,197-249,224,684)x2-3	LOC100288142, NBPF10, HFE2, TXNIP, POLR3GL, ANKRD34A, LIX1L, RBM8A, GNRHR2, PEX11B, ITGA10, ANKRD35, PIAS3, NUDT17, POLR3C, RNF115, CD160, PDZK1, GPR89A, GPR89C, PDZK1P1, NBPF24, NBPF11, HYDIN2, NBPF12, LOC728989, NBPF13P, PRKAB2, PDIA3P, FMO5, CHD1L, LINC00624, BCL9, ACP6, GJA5, GJA8, GPR89B, NBPF8, MIR5087, FLJ39739, PPIAL4B, PPIAL4A, PPIAL4D, PPIAL4F, NBPF14, NBPF9, NBPF15, NBPF16, PPIAL4E, LO…	ECM1, SHC1, FCGR2B, RPS27, TPR, MIXL1, RGS2, PRCC, IGSF8, CENPF, S100A10, S100A7, KCNH1, DUSP10, ARHGEF2, EGLN1, S100A13, PTPN7, ABL2, MEF2D, ESRRG, ARNT, S100A1, KIF14, ATF3, CDC73, CRTC2, PTGS2, TNN, GLRX2, SMYD2, ENAH, TNFSF18, MLLT11, MAPKAPK2, B3GALT2, ASPM, PRRX1, DHX9, S100A4, TROVE2, S100A9, BCL9, PVRL4, ADIPOR1, PLA2G4A, TP53BP2, TPM3, PTPRC, RCSD1, CKS1B, GPA33, AKT3, SDHC, FH, USF1, PI…	hsa-mir-4257, hsa-mir-554, hsa-mir-190b, hsa-mir-4258, hsa-mir-92b, hsa-mir-555, ACA42, ACA26, hsa-mir-9-1, hsa-mir-765, hsa-mir-4259, hsa-mir-556, hsa-mir-921, hsa-mir-1255b-2, hsa-mir-557, hsa-mir-3119-1, hsa-mir-3119-2, hsa-mir-1295, hsa-mir-214, hsa-mir-3120, hsa-mir-199a-2, U81, U47, U80, U79, U78, U44, U77, U76, U75, U74, HBI-100, hsa-mir-488, hsa-mir-3121, hsa-mir-1278, hsa-mir-181b-1, hsa…	C-7DBLT	C-4YYLK	chr1:145376197-249224684
UPN5	Gain	4	10	q26.3	p15.3	921	133193	135285	arr[hg19] 10p15.3q26.3(142,391-135,427,143)x4	ZMYND11, DIP2C, MIR5699, PRR26, LARP4B, GTPBP4, IDI2, IDI2-AS1, IDI1, WDR37, LINC00200, ADARB2, ADARB2-AS1, LINC00700, LINC00701, PFKP, PITRM1, PITRM1-AS1, KLF6, LINC00704, LINC00705, AKR1E2, AKR1C6P, AKR1C1, AKR1C2, AKR1C3, AKR1CL1, AKR1C4, UCN3, TUBAL3, NET1, CALML5, CALML3, ASB13, FAM208B, GDI2, ANKRD16, FBXO18, IL15RA, IL2RA, RBM17, PFKFB3, MIR3155A, MIR3155B, LOC399715, PRKCQ, PRKCQ-AS1, LIN…	MLLT10, BMI1, KLF6, AIFM2, CCDC6, LGI1, TET1, LDB1, FGF8, FGFR2, ERCC6, KAT6B, BLNK, EIF3A, NCOA4, ZMIZ1, PSAP, LOXL4, MAPK8, PAX2, RHOBTB1, PTEN, TLX1, MRC1, BAG3, AKR1C3, DKK1, ADD3, BTRC, ADAM12, ARID5B, DMBT1, MXI1, ABI1, SNCG, ALOX5, NFKB2, NT5C2, SIRT1, HTRA1, RET, NET1, PDCD4, BNIP3, GATA3	hsa-mir-3155, hsa-mir-548q, hsa-mir-4293, hsa-mir-1265, hsa-mir-511-1, hsa-mir-511-2, hsa-mir-1915, hsa-mir-603, hsa-mir-604, hsa-mir-938, hsa-mir-3156-1, hsa-mir-4294, hsa-mir-605, hsa-mir-548f-1, hsa-mir-1296, HBII-419, hsa-mir-1254, hsa-mir-606, hsa-mir-346, hsa-mir-107, hsa-mir-3157, hsa-mir-607, hsa-mir-1287, U108, hsa-mir-608, hsa-mir-3158-2, hsa-mir-3158-1, hsa-mir-146b, hsa-mir-1307, hsa-…		C-5DPFD	chr10:142391-135427143
UPN5	Gain	2.45	14	q32.33	q11.2	770	85690	86773.8	arr[hg19] 14q11.2q32.33(20,511,672-107,285,437)x2-3	OR4L1, OR4K17, OR4N5, OR11G2, OR11H6, OR11H4, TTC5, CCNB1IP1, SNORD126, RPPH1, PARP2, TEP1, KLHL33, OSGEP, APEX1, TMEM55B, PNP, RNASE10, RNASE9, RNASE11, RNASE12, OR6S1, ANG, RNASE4, EDDM3A, EDDM3B, RNASE6, RNASE1, RNASE3, ECRP, RNASE2, METTL17, SLC39A2, NDRG2, TPPP2, RNASE13, RNASE7, RNASE8, ARHGEF40, ZNF219, TMEM253, OR5AU1, LINC00641, HNRNPC, RPGRIP1, SUPT16H, CHD8, SNORD9, SNORD8, RAB2B, TOX4…	NDRG2, NKX2-1, TRA@, PRKD1, LGALS3, DIO2, GPR68, MEG3, BCL11B, OTX2, ESR2, IGH@, AKT1, SEL1L, DPF3, FUT8, TRD, XRCC3, MTA1, PTPN21, TRD@, MMP14, TCL6, ZFP36L1, GPHN, TRIP11, PAX9, VRK1, TCL1A, STRN3, FOXA1, JAG2, TRAF3, ANG, SIX1, TRA, TCL1B, SAV1, EML1, NIN, NUMB, TSHR, IGH	hsa-mir-1201, SNORD126, mgU6-53B, mgU6-53, hsa-mir-208a, hsa-mir-208b, hsa-mir-4307, hsa-mir-3171, hsa-mir-624, hsa-mir-3172, SNORD127, hsa-mir-4308, hsa-mir-548h-1, hsa-mir-625, hsa-mir-1260, ACA65, SNORA11B, hsa-mir-3173, U93, hsa-mir-342, hsa-mir-345, hsa-mir-770, hsa-mir-493, hsa-mir-337, hsa-mir-665, hsa-mir-431, hsa-mir-433, hsa-mir-127, hsa-mir-432, hsa-mir-136, 14q(0), hsa-mir-370, 14q(I-…	S-4ETOO	S-3HXYB	chr14:20511672-107285437
UPN5	Gain	2.2954	15	q26.3	q11.2	807	81560	79658.7	arr[hg19] 15q11.2q26.3(22,770,422-102,429,112)x2-3	TUBGCP5, CYFIP1, NIPA2, NIPA1, LOC283683, WHAMMP3, GOLGA8I, HERC2P2, HERC2P7, GOLGA8EP, LOC440243, GOLGA8S, MIR4508, MKRN3, MAGEL2, NDN, PWRN2, PWRN1, NPAP1, SNRPN, SNURF, SNORD107, PWARSN, PWAR5, SNORD64, SNORD108, SNORD109B, SNORD109A, SNORD116-1, SNORD116-2, SNORD116-9, SNORD116-3, SNORD116-4, SNORD116-7, SNORD116-5, SNORD116-6, SNORD116-8, SNORD116-10, SNORD116-11, SNORD116-12, SNORD116-13, S…	NEIL1, UBE3A, TYRO3, CTSH, MAPK6, PML, GOLGA6A, GCNT3, PLCB2, PKM2, BUB1B, TCF12, COPS2, IDH2, SPINT1, BLM, THBS1, RASGRF1, ITPKA, ATP10A, ADAM10, ITGA11, LTK, BMF, SHC4, KIAA0101, C15orf55, hsa-mir-626, CASC5, NTRK3, IGF1R, SPRED1, TRPM1	HBII-436, HBII-13, HBII-437, HBII-438A, HBII-85-1, HBII-85-2, HBII-85-3, HBII-85-4, HBII-85-5, HBII-85-6, HBII-85-7, HBII-85-8, HBII-85-9, HBII-85-10, HBII-85-11, HBII-85-12, HBII-85-13, HBII-85-14, HBII-85-15, HBII-85-16, HBII-85-17, HBII-85-18, HBII-85-19, HBII-85-20, HBII-85-21, HBII-85-22, HBII-85-23, HBII-85-24, HBII-85-25, HBII-85-26, HBII-85-27, HBII-85-28, HBII-85-29, HBII-52-1, HBII-52-2…	C-4XNTO	C-4JXEO	chr15:22770422-102429112
UPN5	Gain	2.55713	6	q27	p25.3	1220	155053	170763	arr[hg19] 6p25.3q27(156,974-170,919,482)x2-3	DUSP22, IRF4, EXOC2, HUS1B, LOC285768, FOXQ1, FOXF2, FOXC1, GMDS, LOC100508120, C6orf195, MYLK4, WRNIP1, SERPINB1, MIR4645, MGC39372, SERPINB9, SERPINB6, DKFZP686I15217, NQO2, HTATSF1P2, RIPK1, BPHL, TUBB2A, LOC100507194, TUBB2B, PSMG4, SLC22A23, PXDC1, FAM50B, PRPF4B, FAM217A, C6orf201, ECI2, CDYL, RPP40, PPP1R3G, LYRM4, MIR3691, FARS2, NRN1, F13A1, LY86-AS1, LY86, RREB1, SSR1, CAGE1, RIOK1, DSP…	NFKBIE, DEK, AHI1, MAPK13, HIST1H3F, FANCE, EEF1A1, HDAC2, TNFAIP3, RUNX2, IL17A, EPHA7, ZFAND3, POLH, HIST1H4F, IER3, MYB, CCND3, PRDM1, hsa-mir-548a-2, HIST1H2BH, IGF2R, MLLT4, CITED2, BACH2, IRF4, AKAP12, CAGE1, TFAP2A, CDKN1A, CD109, PIM1, SESN1, HIST1H4G, BAK1, LATS1, CTGF, FGFR1OP, DDR1, AGER, E2F3, ARMC2, THBS2, WISP3, RNF217-AS1, HMGA1, TFEB, ID4, BCLAF1, ECT2L, CEP85L, RNASET2, PPARD, TN…	hsa-mir-548a-1, hsa-mir-3143, U32B, hsa-mir-877, U83, U84, ACA38, U48, U52, hsa-mir-1236, hsa-mir-219-1, hsa-mir-1275, hsa-mir-586, hsa-mir-206, hsa-mir-133b, hsa-mir-548u, hsa-mir-30c-2, hsa-mir-30a, hsa-mir-4282, U50, U50B, hsa-mir-2113, hsa-mir-587, hsa-mir-548b, hsa-mir-3144, hsa-mir-588, U101, HBII-429, ACA33, hsa-mir-548a-2, hsa-mir-3145, hsa-mir-1273c, hsa-mir-1202, ACA20, ACA29, hsa-mir-1…		C-5ELRJ	chr6:156974-170919482
UPN5	Gain	4	21	q22.3	q11.2	293	33620	33090.9	arr[hg19] 21q11.2q22.3(15,006,457-48,097,372)x4	POTED, C21orf15, ANKRD20A11P, LIPI, RBM11, ABCC13, HSPA13, SAMSN1, SAMSN1-AS1, LOC388813, NRIP1, USP25, LINC00478, MIR99A, MIRLET7C, MIR125B2, C21orf37, CXADR, BTG3, C21orf91-OT1, C21orf91, CHODL-AS1, CHODL, TMPRSS15, LINC00320, NCAM2, RNU6-67P, LINC00317, LINC00308, D21S2088E, LOC339622, LINC00158, MIR155HG, MIR155, LINC00515, MRPL39, JAM2, ATP5J, GABPA, APP, CYYR1, ADAMTS1, ADAMTS5, MIR4759, MI…	NRIP1, TIAM1, TMPRSS3, PTTG1IP, RUNX1, S100B, ADAMTS1, DYRK1A, OLIG2, TMPRSS2, ETS2, CSTB, TFF1, TFF2, TFF3, MIR125B2, ERG, U2AF1	hsa-mir-3118-5, hsa-mir-99a, hsa-let-7c, hsa-mir-125b-2, hsa-mir-548x, hsa-mir-155, hsa-mir-4327, ACA67, hsa-mir-802, hsa-mir-3197	C-6OPRF	C-3ELOA	chr21:15006457-48097372
UPN5	Gain	4	18	q23	p11.32	342	66936	77877.9	arr[hg19] 18p11.32q23(136,226-78,014,123)x4	USP14, THOC1, COLEC12, CETN1, CLUL1, C18orf56, TYMS, ENOSF1, YES1, ADCYAP1, LINC00470, METTL4, NDC80, CBX3P2, SMCHD1, EMILIN2, LPIN2, LOC727896, MYOM1, MYL12A, MYL12B, TGIF1, DLGAP1, DLGAP1-AS1, DLGAP1-AS3, DLGAP1-AS4, DLGAP1-AS5, C18orf42, LINC00526, LINC00667, ZBTB14, EPB41L3, LOC645355, MIR3976, TMEM200C, L3MBTL4, MIR4317, LOC100130480, ARHGAP28, LINC00668, LAMA1, LRRC30, PTPRM, LOC100192426, …	SMAD2, BCL2, SETBP1, ZNF521, RBBP8, MAPK4, SLC39A6, PTPN2, MBD2, GATA6, SS18, MALT1, SERPINB5, DCC, EPB41L3, DSG2, PHLPP1, SMAD4	hsa-mir-4317, hsa-mir-3156-2, hsa-mir-320c-1, hsa-mir-133a-1, hsa-mir-1-2, hsa-mir-320c-2, hsa-mir-302f, hsa-mir-187, hsa-mir-4318, hsa-mir-924, hsa-mir-4319, hsa-mir-1539, U58C, U58A, U58B, mgU12-22/U4-8, U91, hsa-mir-4320, ACA37, hsa-mir-122	C-7KBTZ	C-6HGFA	chr18:136226-78014123
UPN5	Gain	2.45	17	q25.3	p13.3	1373	73347	81041.4	arr[hg19] 17p13.3q25.3(525-81,041,938)x2-3	DOC2B, RPH3AL, LOC100506388, C17orf97, FAM101B, VPS53, FAM57A, GEMIN4, DBIL5P, GLOD4, RNMTL1, NXN, TIMM22, ABR, MIR3183, BHLHA9, TUSC5, YWHAE, CRK, MYO1C, INPP5K, PITPNA-AS1, PITPNA, SLC43A2, SCARF1, RILP, PRPF8, TLCD2, MIR22HG, MIR22, WDR81, SERPINF2, SERPINF1, SMYD4, RPA1, RTN4RL1, DPH1, OVCA2, MIR132, MIR212, HIC1, SMG6, SRR, TSR1, SNORD91B, SNORD91A, SGSM2, MNT, LOC284009, METTL16, PAFAH1B1, …	STARD3, IKZF3, RABEP1, FAM57A, WRAP53, DDX5, SLC9A3R1, CRLF3, GAST, KDM6B, XAF1, ALOX15, GAS7, PRKAR1A, NF1, HLF, ASPSCR1, PER1, TRPV1, ALOX12, TAF15, SLC4A1, ETV4, MIR21, DLX4, SHBG, PYY, RECQL5, ERBB2, STAT5B, TRAF4, RARA, ENPP7, KSR1, CASC3, TP53, COL1A1, RNF213, SEPT9, TRIM37, FLCN, GRB2, CLDN7, AXIN2, HIC1, RPL26, SUZ12P, CLTC, RAD51D, PPP1R1B, PPM1D, IGF2BP1, CDC6, NCOR1, MLLT6, GRN, BRCA1,…	hsa-mir-3183, hsa-mir-22, hsa-mir-132, hsa-mir-212, HBII-296B, HBII-296A, hsa-mir-1253, hsa-mir-195, hsa-mir-497, hsa-mir-324, ACA48, mgU6-77, U67, ACA68, hsa-mir-4314, U8, hsa-mir-744, hsa-mir-548h-3, hsa-mir-1288, U49B, U49A, HBII-135, hsa-mir-33b, U3-2, U3-2B, U3-4, U3, U3-3, hsa-mir-1180, ACA59B, U42B, mgh18S-121, U42A, Z17B, hsa-mir-451, hsa-mir-144, hsa-mir-423, hsa-mir-3184, hsa-mir-193a, …	C-5VAZU	S-4LRWR	chr17:525-81041938
UPN5	Gain	3	11	q25	p15.5	1459	136510	134708	arr[hg19] 11p15.5q25(230,615-134,938,470)x3	SIRT3, PSMD13, NLRP6, ATHL1, IFITM5, IFITM2, IFITM1, IFITM3, B4GALNT4, PKP3, SIGIRR, ANO9, PTDSS2, RNH1, HRAS, LRRC56, C11orf35, RASSF7, MIR210HG, MIR210, LOC143666, PHRF1, IRF7, CDHR5, SCT, DRD4, DEAF1, TMEM80, EPS8L2, TALDO1, PDDC1, NS3BP, CEND1, SLC25A22, PIDD, RPLP2, SNORA52, PNPLA2, EFCAB4A, CD151, POLR2L, TSPAN4, CHID1, AP2A2, MUC6, MUC2, MUC5B, TOLLIP, TOLLIP-AS1, BRSK2, MOB2, DUSP8, KRTAP…	STIP1, MUC2, H2AFX, NUP98, BIRC2, KIAA1549L (C11orf41), KAT5, THRSP, RAG1, MIR125B1, RAD9A, SPA17, HRAS, MUC6, HTATIP2, LRP5, FERMT3, PLCB3, THY1, CARS, TMPRSS4, CD82, POU2AF1, APLNR, TRPT1, WT1, BAD, MYEOV, SPI1, SIPA1, TAGLN, MLL, FANCF, BRMS1, BIRC3, LMO2, RAG2, CBL, DDB2, FEN1, FAU, CD248, PTPRJ, NUMA1, NPAT, CST6, NEU3, CRYAB, EED, CHKA, C11orf30, FLI1, ORAOV1, CCND1, ZBTB16, DDX10, CLP1, ME…	hsa-mir-210, ACA52, hsa-mir-4298, hsa-mir-675, hsa-mir-483, ACA54, hsa-mir-302e, ACA3, ACA3-2, ACA23, U97, hsa-mir-4299, U14B, U14A, hsa-mir-3159, hsa-mir-610, hsa-mir-670, hsa-mir-129-2, hsa-mir-3160-1, hsa-mir-3160-2, HBII-166, hsa-mir-3161, hsa-mir-130a, hsa-mir-3162, hsa-mir-611, hsa-mir-1908, U99, U22, U31, U30, U29, U28, U27, U26, U25, hsa-mir-1237, hsa-mir-192, hsa-mir-194-2, hsa-mir-612, …		S-3EDHX	chr11:230615-134938470
UPN5	Gain	2.45	4	q35.2	p16.3	891	153163	190889	arr[hg19] 4p16.3q35.2(68,345-190,957,473)x2-3	ZNF595, ZNF718, ZNF876P, ZNF732, ZNF141, ABCA11P, ZNF721, PIGG, PDE6B, ATP5I, MYL5, MFSD7, PCGF3, LOC100129917, CPLX1, GAK, TMEM175, DGKQ, SLC26A1, IDUA, FGFRL1, RNF212, TMED11P, SPON2, LOC100130872, CTBP1, CTBP1-AS2, MAEA, UVSSA, CRIPAK, FAM53A, SLBP, TMEM129, TACC3, FGFR3, LETM1, WHSC1, SCARNA22, NELFA, MIR943, C4orf48, NAT8L, POLN, HAUS3, MXD4, MIR4800, ZFYVE28, LOC402160, RNF4, FAM193A, TNIP2…	TACC3, FRYL, HNRNPD, FAT1, RCHY1, WHSC1, FGF2, PDGFRA, MAPK10, PTPN13, EIF4E, NPY1R, SORBS2, SPP1, FGFR3, ING2, RASL11B, LEF1, NFKB1, FIP1L1, S100P, SYNPO2, REST, MAD2L1, RASSF6, AREG, TET2, FBXW7, KIT, AFF1, CHIC2, NR3C2, RAP1GDS1, RHOH, NUDT6	hsa-mir-571, ACA11, hsa-mir-943, hsa-mir-4274, hsa-mir-95, hsa-mir-548i-2, hsa-mir-3138, hsa-mir-572, hsa-mir-218-1, hsa-mir-573, hsa-mir-4275, hsa-mir-1255b-1, hsa-mir-574, HBI-6, hsa-mir-1269, hsa-mir-575, hsa-mir-1255a, hsa-mir-576, hsa-mir-297, hsa-mir-367, hsa-mir-302d, hsa-mir-302a, hsa-mir-302c, hsa-mir-302b, hsa-mir-1243, hsa-mir-577, hsa-mir-1973, ACA24, hsa-mir-2054, hsa-mir-3139, hsa-m…		C-7HDOD	chr4:68345-190957473
UPN5	Gain	2.26	8	q24.3	p23.3	837	125254	146138	arr[hg19] 8p23.3q24.3(158,048-146,295,771)x2-3	RPL23AP53, ZNF596, FAM87A, FBXO25, TDRP, ERICH1, ERICH1-AS1, LOC286083, DLGAP2, CLN8, MIR596, ARHGEF10, KBTBD11, MYOM2, CSMD1, LOC100287015, MCPH1, ANGPT2, AGPAT5, MIR4659A, MIR4659B, XKR5, LOC100652791, DEFB1, DEFA6, DEFA4, DEFA8P, DEFA9P, DEFA10P, DEFA1B, DEFA1, DEFT1P, DEFT1P2, DEFA3, DEFA11P, DEFA5, LINC00965, FAM66B, DEFB109P1B, USP17L1P, USP17L4, ZNF705G, DEFB4B, DEFB103B, DEFB103A, SPAG11B…	TNKS, CLU, NAT2, NAT1, IDO1, CYP7B1, PCM1, RAD21, CTHRC1, ASH2L, FGFR1, CYP7A1, DEFB1, PLAG1, TACC1, PTK2B, HAS2, RECQL4, GGH, MYC, WHSC1L1, DLC1, ADAM9, WWP1, MCPH1, IDO2, RUNX1T1, NBN, WRN, SNAI2, NKX3-1, BAALC, RNF139, TPD52, TOX, ENPP2, NDRG1, MAFA, KIAA1967, KAT6A, MYBL1, EBAG9, CTSB, TNFRSF11B, TP53INP1, EXT1, LOXL2, PTK2, PAG1, COX6C, MTUS1, EIF4EBP1, BOP1, RHOBTB2, NCOA2, PSCA	hsa-mir-596, hsa-mir-548i-3, hsa-mir-597, hsa-mir-124-1, hsa-mir-4286, hsa-mir-1322, hsa-mir-598, hsa-mir-383, hsa-mir-548v, hsa-mir-320a, hsa-mir-548h-4, hsa-mir-4287, hsa-mir-4288, hsa-mir-3148, U13, hsa-mir-486, U54, hsa-mir-124-2, HBII-276, hsa-mir-2052, hsa-mir-3149, hsa-mir-3150, U72, hsa-mir-599, hsa-mir-875, hsa-mir-1273, hsa-mir-3151, hsa-mir-548a-3, hsa-mir-2053, hsa-mir-548d-1, hsa-mir…		C-3WEHE	chr8:158048-146295771
UPN5	GainMosaic	3	12	q24.33	p13.33	1184	129778	133604	arr[hg19] 12p13.33q24.33(173,786-133,777,902)x3-4	IQSEC3, LOC574538, SLC6A12, SLC6A13, KDM5A, CCDC77, B4GALNT3, NINJ2, WNK1, RAD52, ERC1, LINC00942, FBXL14, WNT5B, MIR3649, ADIPOR2, CACNA2D4, LRTM2, LINC00940, DCP1B, CACNA1C, CACNA1C-AS4, CACNA1C-IT3, CACNA1C-AS1, LOC283440, FKBP4, ITFG2, NRIP2, LOC100507424, FOXM1, RHNO1, TULP3, TEAD4, TSPAN9, PRMT8, EFCAB4B, PARP11, CCND2, C12orf5, FGF23, FGF6, C12orf4, RAD51AP1, DYRK4, AKAP3, NDUFA9, GALNT8, …	HNRNPA1 , PRKAB1, BTG1, EPS8, PXN, DENR, PPFIBP1, FOXM1, ING4, KLRK1, RECQL, APAF1, MIR200C, PA2G4, SMARCC2, P2RX7, SOCS2, GABARAPL1, MDM2, ELK3, ALDH2, CHFR, ATF1, ERC1, HMGA2, SH2B3, PEBP1, TRIAP1, VWF, RAN, HOXC11, ETNK1, CD9, DDIT3, CDK4, EP400, KDM5A, CCND2, ASCL1, KITLG, SARNP, RAP1B, FBRSL1, ETV6, METAP2, PTPN11, SLC5A8, BCL2L14, KRAS, IL23A, PAWR, DUSP6, ATF7IP, ZNF384, DRAM1, IL22, PTHLH…	U85, ACA57, hsa-mir-200c, hsa-mir-141, U89, hsa-mir-1244-3, hsa-mir-613, hsa-mir-614, hsa-mir-920, hsa-mir-4302, ACA34, hsa-mir-1291, ACA2a, ACA2b, hsa-mir-1293, hsa-mir-196a-2, hsa-mir-615, hsa-mir-148b, U59B, U59A, hsa-mir-1228, hsa-mir-616, hsa-mir-26a-2, hsa-let-7i, hsa-mir-548c, U70G, hsa-mir-1279, hsa-mir-1252, hsa-mir-617, hsa-mir-618, hsa-mir-492, hsa-mir-331, hsa-mir-1251, hsa-mir-135a-2…		C-7PNZW	chr12:173786-133777902
UPN5	GainMosaic	2.2954	15	q26.3	q11.2	807	81560	79658.7	arr[hg19] 15q11.2q26.3(22,770,422-102,429,112)x2-3	TUBGCP5, CYFIP1, NIPA2, NIPA1, LOC283683, WHAMMP3, GOLGA8I, HERC2P2, HERC2P7, GOLGA8EP, LOC440243, GOLGA8S, MIR4508, MKRN3, MAGEL2, NDN, PWRN2, PWRN1, NPAP1, SNRPN, SNURF, SNORD107, PWARSN, PWAR5, SNORD64, SNORD108, SNORD109B, SNORD109A, SNORD116-1, SNORD116-2, SNORD116-9, SNORD116-3, SNORD116-4, SNORD116-7, SNORD116-5, SNORD116-6, SNORD116-8, SNORD116-10, SNORD116-11, SNORD116-12, SNORD116-13, S…	NEIL1, UBE3A, TYRO3, CTSH, MAPK6, PML, GOLGA6A, GCNT3, PLCB2, PKM2, BUB1B, TCF12, COPS2, IDH2, SPINT1, BLM, THBS1, RASGRF1, ITPKA, ATP10A, ADAM10, ITGA11, LTK, BMF, SHC4, KIAA0101, C15orf55, hsa-mir-626, CASC5, NTRK3, IGF1R, SPRED1, TRPM1	HBII-436, HBII-13, HBII-437, HBII-438A, HBII-85-1, HBII-85-2, HBII-85-3, HBII-85-4, HBII-85-5, HBII-85-6, HBII-85-7, HBII-85-8, HBII-85-9, HBII-85-10, HBII-85-11, HBII-85-12, HBII-85-13, HBII-85-14, HBII-85-15, HBII-85-16, HBII-85-17, HBII-85-18, HBII-85-19, HBII-85-20, HBII-85-21, HBII-85-22, HBII-85-23, HBII-85-24, HBII-85-25, HBII-85-26, HBII-85-27, HBII-85-28, HBII-85-29, HBII-52-1, HBII-52-2…	C-4XNTO	C-4JXEO	chr15:22770422-102429112
UPN5	GainMosaic	2.40889	8	q24.3	p23.3	837	125254	146138	arr[hg19] 8p23.3q24.3(158,048-146,295,771)x2-3	RPL23AP53, ZNF596, FAM87A, FBXO25, TDRP, ERICH1, ERICH1-AS1, LOC286083, DLGAP2, CLN8, MIR596, ARHGEF10, KBTBD11, MYOM2, CSMD1, LOC100287015, MCPH1, ANGPT2, AGPAT5, MIR4659A, MIR4659B, XKR5, LOC100652791, DEFB1, DEFA6, DEFA4, DEFA8P, DEFA9P, DEFA10P, DEFA1B, DEFA1, DEFT1P, DEFT1P2, DEFA3, DEFA11P, DEFA5, LINC00965, FAM66B, DEFB109P1B, USP17L1P, USP17L4, ZNF705G, DEFB4B, DEFB103B, DEFB103A, SPAG11B…	TNKS, CLU, NAT2, NAT1, IDO1, CYP7B1, PCM1, RAD21, CTHRC1, ASH2L, FGFR1, CYP7A1, DEFB1, PLAG1, TACC1, PTK2B, HAS2, RECQL4, GGH, MYC, WHSC1L1, DLC1, ADAM9, WWP1, MCPH1, IDO2, RUNX1T1, NBN, WRN, SNAI2, NKX3-1, BAALC, RNF139, TPD52, TOX, ENPP2, NDRG1, MAFA, KIAA1967, KAT6A, MYBL1, EBAG9, CTSB, TNFRSF11B, TP53INP1, EXT1, LOXL2, PTK2, PAG1, COX6C, MTUS1, EIF4EBP1, BOP1, RHOBTB2, NCOA2, PSCA	hsa-mir-596, hsa-mir-548i-3, hsa-mir-597, hsa-mir-124-1, hsa-mir-4286, hsa-mir-1322, hsa-mir-598, hsa-mir-383, hsa-mir-548v, hsa-mir-320a, hsa-mir-548h-4, hsa-mir-4287, hsa-mir-4288, hsa-mir-3148, U13, hsa-mir-486, U54, hsa-mir-124-2, HBII-276, hsa-mir-2052, hsa-mir-3149, hsa-mir-3150, U72, hsa-mir-599, hsa-mir-875, hsa-mir-1273, hsa-mir-3151, hsa-mir-548a-3, hsa-mir-2053, hsa-mir-548d-1, hsa-mir…		C-3WEHE	chr8:158048-146295771
UPN5	LOH		22	q13.33	q11.1	540	9052	33981.6	arr[hg19] 22q11.1q13.33(17,196,299-51,177,928) hmz	XKR3, HSFY1P1, GAB4, CECR7, IL17RA, CECR6, CECR5, CECR5-AS1, CECR1, CECR3, CECR2, SLC25A18, ATP6V1E1, BCL2L13, BID, MIR3198-1, LINC00528, MICAL3, MIR648, FLJ41941, PEX26, TUBA8, USP18, GGT3P, DGCR6, PRODH, DGCR5, DGCR9, DGCR10, DGCR2, DGCR11, DGCR14, TSSK2, GSC2, SLC25A1, CLTCL1, HIRA, MRPL40, C22orf39, UFD1L, CDC45, CLDN5, LINC00895, SEPT5, SEPT5-GP1BB, GP1BB, TBX1, GNB1L, C22orf29, TXNRD2, COMT…	BRD1, CHEK2, NF2, MAPK1, EWSR1, TYMP, IGLL1, VPREB1, SEPT5, ATF4, SOX10, IL2RB, MN1, MIF, MYH9, EP300, BCR, MCM5, CLTCL1, IGL@, RAC2, PARVB, RBX1, XRCC6, Sep.05, FBLN1, MAPK12, PDGFB, MKL1, SMARCB1, MMP11	hsa-mir-3198, hsa-mir-648, hsa-mir-185, hsa-mir-1306, hsa-mir-1286, hsa-mir-649, hsa-mir-301b, hsa-mir-130b, hsa-mir-650, hsa-mir-548j, hsa-mir-3199-1, hsa-mir-3199-2, SNORD125, hsa-mir-3200, hsa-mir-658, hsa-mir-659, U83B, U83A, U43, hsa-mir-1281, hsa-mir-33a, hsa-mir-1249, hsa-let-7a-3, hsa-let-7b, hsa-mir-3201	S-3SJOV	S-3GRGV	chr22:17196299-51177928
UPN5	LOH		18	q21.31	q21.2	13	806	3471.83	arr[hg19] 18q21.2q21.31(51,184,192-54,656,025) hmz	MBD2, SNORA37, POLI, STARD6, C18orf54, DYNAP, RAB27B, CCDC68, TCF4, MIR4529, LOC100505474, TXNL1, WDR7	MBD2	ACA37	S-4MMXQ	S-3TPLI	chr18:51184192-54656025
UPN5	LOH		19	q13.43	p13.3	1632	11507	58836.8	arr[hg19] 19p13.3q13.43(260,911-59,097,752) hmz	PPAP2C, MIER2, THEG, C2CD4C, SHC2, ODF3L2, MADCAM1, TPGS1, CDC34, GZMM, BSG, HCN2, POLRMT, FGF22, RNF126, FSTL3, PRSS57, PALM, MISP, PTBP1, MIR4745, LPPR3, MIR3187, AZU1, PRTN3, ELANE, CFD, MED16, R3HDM4, KISS1R, ARID3A, WDR18, GRIN3B, TMEM259, CNN2, ABCA7, HMHA1, POLR2E, GPX4, SBNO2, STK11, C19orf26, ATP5D, MIDN, CIRBP-AS1, CIRBP, C19orf24, EFNA2, MUM1, NDUFS7, GAMT, DAZAP1, RPS15, APC2, C19orf2…	MUC16, CYP2A6, FXYD5, TCF3, GLTSCR2, NPAS1, CNOT3, KLK4, KLK11, CARD8, DYRK1B, FSTL3, BRD4, TYK2, JUNB, TMEM160, MIR125A, MLLT1, WTIP, RUVBL2, ELAVL1, CD97, PLAUR, PAF1, RELB, CEBPA, LYL1, BCL2L12, CALR, BBC3, STK11, DNM2, DNMT1, ERCC1, ZNF146, ATF5, JAK3, MARK4, SH3GL1, CRTC1, SCAF1, KLK10, SLC5A5, UBA2, AKT2, BCL3, CBLC, CEACAM1, GNA11, TFPT, FCER2, GPI, NOTCH3, ELL, ICAM1, PPP1R13L, KLK5, GADD…	hsa-mir-3187, hsa-mir-1909, hsa-mir-1227, hsa-mir-4321, hsa-mir-637, U37, hsa-mir-7-3, hsa-mir-220b, U105, U105B, hsa-mir-4322, hsa-mir-1181, hsa-mir-1238, hsa-mir-638, hsa-mir-199a-1, U41, hsa-mir-24-2, hsa-mir-27a, hsa-mir-23a, hsa-mir-181c, hsa-mir-181d, hsa-mir-639, hsa-mir-1470, U68, hsa-mir-3188, hsa-mir-3189, hsa-mir-640, hsa-mir-1270-1, hsa-mir-1270-2, hsa-mir-641, hsa-mir-4323, hsa-mir-3…	S-4CJRO	S-3PNCX	chr19:260911-59097752
UPN5	LOH		2	q37.3	p25.3	1494	65809	242760	arr[hg19] 2p25.3q37.3(15,702-242,775,910) hmz	FAM110C, SH3YL1, ACP1, FAM150B, TMEM18, LOC339822, SNTG2, TPO, PXDN, MYT1L, LOC730811, TSSC1, TRAPPC12, ADI1, RNASEH1, LOC100506054, RPS7, COLEC11, ALLC, LOC100505964, LOC727982, SOX11, LOC150622, LOC400940, LINC00487, CMPK2, RSAD2, RNF144A-AS1, RNF144A, LOC100506274, LOC339788, LINC00299, ID2, KIDINS220, MBOAT2, ASAP2, ITGB1BP1, CPSF3, IAH1, ADAM17, YWHAQ, TAF1B, GRHL1, KLF11, CYS1, RRM2, C2orf4…	SEPT2, E2F6, EPCAM, FHL2, ADAM23, ERCC3, TGFBRAP1, BIN1, HSPD1, AAMP, MSH2, MYCN, DIRC3, REL, PTMA, BRE, MAL, MERTK, PAX8, ATF2, LOXL3, AFF3, ADAM17, SF3B1, BOK, CFLAR, CXCR7, TMSB10, BCL11A, FBXO11, NLRC4, IL1B, SDC1, RHOB, DNMT3A, BCL2L11, BIRC6, RTN4, BARD1, DDX1, TTL, RANBP2, IGK, MSH6, DIRC1, MTA3, SOX11, HOXD13, ALK, CAPG, BUB1, HOXD11, PDE11A, XPO1, EML4, PMS1, ACVR2A, PAX3, INPP5D, ATIC, …	hsa-mir-4261, ACA67B, hsa-mir-548s, hsa-mir-4262, hsa-mir-3125, hsa-mir-1301, hsa-mir-4263, HBII-316, U53, hsa-mir-558, hsa-mir-559, hsa-mir-217, hsa-mir-216a, hsa-mir-216b, U70B, hsa-mir-3126, SNORA36C, hsa-mir-1285-2, hsa-mir-4264, U94, hsa-mir-3127, HBII-289, hsa-mir-4265, hsa-mir-4266, hsa-mir-4267, hsa-mir-1302-3, hsa-mir-663b, hsa-mir-128-1, U70F, hsa-mir-933, hsa-mir-10b, hsa-mir-1246, hsa…		S-4FWRM	chr2:15702-242775910
UPN6	Gain	2.48042	10	q26.3	p15.3	921	133229	135327	arr[hg19] 10p15.3q26.3(100,026-135,427,143)x2-3	ZMYND11, DIP2C, MIR5699, PRR26, LARP4B, GTPBP4, IDI2, IDI2-AS1, IDI1, WDR37, LINC00200, ADARB2, ADARB2-AS1, LINC00700, LINC00701, PFKP, PITRM1, PITRM1-AS1, KLF6, LINC00704, LINC00705, AKR1E2, AKR1C6P, AKR1C1, AKR1C2, AKR1C3, AKR1CL1, AKR1C4, UCN3, TUBAL3, NET1, CALML5, CALML3, ASB13, FAM208B, GDI2, ANKRD16, FBXO18, IL15RA, IL2RA, RBM17, PFKFB3, MIR3155A, MIR3155B, LOC399715, PRKCQ, PRKCQ-AS1, LIN…	ADD3, MXI1, PDCD4, ERCC6, TET1, MLLT10, HTRA1, LDB1, NCOA4, BTRC, NET1, FGF8, ABI1, CCDC6, RET, NFKB2, AKR1C3, ALOX5, MAPK8, RHOBTB1, SIRT1, TLX1, ARID5B, PSAP, NT5C2, BNIP3, GATA3, ADAM12, AIFM2, BLNK, FGFR2, DKK1, LOXL4, EIF3A, MRC1, PTEN, KLF6, PAX2, SNCG, ZMIZ1, DMBT1, KAT6B, LGI1, BMI1, BAG3	hsa-mir-3155, hsa-mir-548q, hsa-mir-4293, hsa-mir-1265, hsa-mir-511-1, hsa-mir-511-2, hsa-mir-1915, hsa-mir-603, hsa-mir-604, hsa-mir-938, hsa-mir-3156-1, hsa-mir-4294, hsa-mir-605, hsa-mir-548f-1, hsa-mir-1296, HBII-419, hsa-mir-1254, hsa-mir-606, hsa-mir-346, hsa-mir-107, hsa-mir-3157, hsa-mir-607, hsa-mir-1287, U108, hsa-mir-608, hsa-mir-3158-1, hsa-mir-3158-2, hsa-mir-146b, hsa-mir-1307, hsa-…		C-5DPFD	chr10:100026-135427143
UPN6	Gain	2.54455	6	q27	p25.3	1220	155053	170763	arr[hg19] 6p25.3q27(156,974-170,919,482)x2-3	DUSP22, IRF4, EXOC2, HUS1B, LOC285768, FOXQ1, FOXF2, FOXC1, GMDS, LOC100508120, C6orf195, MYLK4, WRNIP1, SERPINB1, MIR4645, MGC39372, SERPINB9, SERPINB6, DKFZP686I15217, NQO2, HTATSF1P2, RIPK1, BPHL, TUBB2A, LOC100507194, TUBB2B, PSMG4, SLC22A23, PXDC1, FAM50B, PRPF4B, FAM217A, C6orf201, ECI2, CDYL, RPP40, PPP1R3G, LYRM4, MIR3691, FARS2, NRN1, F13A1, LY86-AS1, LY86, RREB1, SSR1, CAGE1, RIOK1, DSP…	CD109, IGF2R, FGFR1OP, TNFAIP3, PRDM1, HDAC2, AKAP12, NFKBIE, ARMC2, JARID2, SESN1, MAPK13, AHI1, DAXX, THBS2, FOXO3, BCLAF1, POLH, DEK, DDR1, CEP85L, HIST1H3F, EPHA7, HIST1H2BH, ZFAND3, LTA, PPARD, ECT2L, MYB, WISP3, CCNC, IER3, CTGF, ID4, RNASET2, DDX43, MLLT4, LATS1, TNF, MAPK14, IL17A, PLAGL1, EEF1A1, TFEB, BAK1, SMAP1, RNF217-AS1, BACH2, LIN28B, CDKN1A, IRF4, FANCE, SOX4, HIST1H4G, HMGA1, CC…	hsa-mir-548a-1, hsa-mir-3143, U32B, hsa-mir-877, U83, U84, ACA38, U48, U52, hsa-mir-1236, hsa-mir-219-1, hsa-mir-1275, hsa-mir-586, hsa-mir-206, hsa-mir-133b, hsa-mir-548u, hsa-mir-30c-2, hsa-mir-30a, hsa-mir-4282, U50, U50B, hsa-mir-2113, hsa-mir-587, hsa-mir-548b, hsa-mir-3144, hsa-mir-588, U101, HBII-429, ACA33, hsa-mir-548a-2, hsa-mir-3145, hsa-mir-1273c, hsa-mir-1202, ACA20, ACA29, hsa-mir-1…		C-5ELRJ	chr6:156974-170919482
UPN6	Gain	2.59946	4	q35.2	p16.3	891	153163	190889	arr[hg19] 4p16.3q35.2(68,345-190,957,473)x2-3	ZNF595, ZNF718, ZNF876P, ZNF732, ZNF141, ABCA11P, ZNF721, PIGG, PDE6B, ATP5I, MYL5, MFSD7, PCGF3, LOC100129917, CPLX1, GAK, TMEM175, DGKQ, SLC26A1, IDUA, FGFRL1, RNF212, TMED11P, SPON2, LOC100130872, CTBP1, CTBP1-AS2, MAEA, UVSSA, CRIPAK, FAM53A, SLBP, TMEM129, TACC3, FGFR3, LETM1, WHSC1, SCARNA22, NELFA, MIR943, C4orf48, NAT8L, POLN, HAUS3, MXD4, MIR4800, ZFYVE28, LOC402160, RNF4, FAM193A, TNIP2…	FGF2, FIP1L1, RAP1GDS1, WHSC1, FGFR3, MAD2L1, S100P, NR3C2, NPY1R, FAT1, CHIC2, TET2, RASSF6, RASL11B, RCHY1, EIF4E, NUDT6, SORBS2, FRYL, PTPN13, RHOH, AREG, ING2, TACC3, MAPK10, KIT, SYNPO2, AFF1, HNRNPD, SPP1, PDGFRA, LEF1, FBXW7, REST, NFKB1	hsa-mir-571, ACA11, hsa-mir-943, hsa-mir-4274, hsa-mir-95, hsa-mir-548i-2, hsa-mir-3138, hsa-mir-572, hsa-mir-218-1, hsa-mir-573, hsa-mir-4275, hsa-mir-1255b-1, hsa-mir-574, HBI-6, hsa-mir-1269, hsa-mir-575, hsa-mir-1255a, hsa-mir-576, hsa-mir-297, hsa-mir-367, hsa-mir-302d, hsa-mir-302a, hsa-mir-302c, hsa-mir-302b, hsa-mir-1243, hsa-mir-577, hsa-mir-1973, ACA24, hsa-mir-2054, hsa-mir-3139, hsa-m…		C-7HDOD	chr4:68345-190957473
UPN6	Gain	2.50064	14	q32.33	q11.2	770	85690	86773.8	arr[hg19] 14q11.2q32.33(20,511,672-107,285,437)x2-3	OR4L1, OR4K17, OR4N5, OR11G2, OR11H6, OR11H4, TTC5, CCNB1IP1, SNORD126, RPPH1, PARP2, TEP1, KLHL33, OSGEP, APEX1, TMEM55B, PNP, RNASE10, RNASE9, RNASE11, RNASE12, OR6S1, ANG, RNASE4, EDDM3A, EDDM3B, RNASE6, RNASE1, RNASE3, ECRP, RNASE2, METTL17, SLC39A2, NDRG2, TPPP2, RNASE13, RNASE7, RNASE8, ARHGEF40, ZNF219, TMEM253, OR5AU1, LINC00641, HNRNPC, RPGRIP1, SUPT16H, CHD8, SNORD9, SNORD8, RAB2B, TOX4…	FUT8, TCL6, TRA, DPF3, ZFP36L1, TSHR, TRAF3, GPHN, EML1, TCL1A, FOXA1, NDRG2, PAX9, SAV1, IGH@, PRKD1, STRN3, SEL1L, GPR68, NIN, BCL11B, MMP14, TCL1B, ANG, MEG3, MTA1, DIO2, XRCC3, TRA@, OTX2, VRK1, LGALS3, SIX1, TRIP11, JAG2, AKT1, NKX2-1, PTPN21, TRD, TRD@, ESR2, NUMB, IGH	hsa-mir-1201, SNORD126, mgU6-53B, mgU6-53, hsa-mir-208a, hsa-mir-208b, hsa-mir-4307, hsa-mir-3171, hsa-mir-624, hsa-mir-3172, SNORD127, hsa-mir-4308, hsa-mir-548h-1, hsa-mir-625, hsa-mir-1260, ACA65, SNORA11B, hsa-mir-3173, U93, hsa-mir-342, hsa-mir-345, hsa-mir-770, hsa-mir-493, hsa-mir-337, hsa-mir-665, hsa-mir-431, hsa-mir-433, hsa-mir-127, hsa-mir-432, hsa-mir-136, 14q(0), hsa-mir-370, 14q(I-…		S-3HXYB	chr14:20511672-107285437
UPN6	Gain	1.55773	X	q28	p22.33	992	184879	151776	arr[hg19] Xp22.33q28(2,787,454-154,563,419)x1-2	GYG2, ARSD, ARSE, ARSH, ARSF, CXorf28, MXRA5, PRKX, LOC389906, NLGN4X, MIR4770, VCX3A, HDHD1, MIR4767, STS, VCX, PNPLA4, MIR651, VCX2, VCX3B, KAL1, FAM9A, FAM9B, TBL1X, GPR143, SHROOM2, LOC100288814, WWC3, CLCN4, MID1, HCCS, ARHGAP6, AMELX, MSL3, FRMPD4, PRPS2, TLR7, TLR8-AS1, TLR8, TMSB4X, FAM9C, LOC100093698, ATXN3L, LOC100133123, EGFL6, TCEANC, RAB9A, TRAPPC2, OFD1, GPM6B, GEMIN8, GLRA2, FANCB…	STAG2, REPS2, FOXO4, L1CAM, MTCP1, NONO, RHOXF2, DKC1, AR, AMOT, RPL10, MIR221, FAM123B, ARMCX3, RBBP7, ZRSR2, KDM6A, BRWD3, FOXP3, SSX2, ARMCX2, Sep.06, ZBTB33, AIFM1, GPC3, PHF6, MSN, BCOR, ARMCX1, SPANXA1, MIR222, GATA1, SEPT6, ELF4, TFE3, CXCR3, BTK, DACH2	hsa-mir-651, hsa-mir-1308, ACA12, hsa-mir-548f-5, hsa-mir-221, hsa-mir-222, SNORA11C, hsa-mir-532, hsa-mir-188, hsa-mir-500, hsa-mir-362, hsa-mir-501, hsa-mir-500b, hsa-mir-660, hsa-mir-502, SNORA11E, SNORA11D, hsa-mir-98, hsa-let-7f-2, U107, hsa-mir-1468, hsa-mir-223, hsa-mir-421, hsa-mir-374b, hsa-mir-545, hsa-mir-374a, hsa-mir-384, hsa-mir-325, hsa-mir-4328, hsa-mir-548i-4, hsa-mir-1321, hsa-m…		C-5BCKK	chrX:2787454-154563419
UPN6	Gain	4	21	q22.3	q11.2	293	33620	33090.9	arr[hg19] 21q11.2q22.3(15,006,457-48,097,372)x4	POTED, C21orf15, ANKRD20A11P, LIPI, RBM11, ABCC13, HSPA13, SAMSN1, SAMSN1-AS1, LOC388813, NRIP1, USP25, LINC00478, MIR99A, MIRLET7C, MIR125B2, C21orf37, CXADR, BTG3, C21orf91-OT1, C21orf91, CHODL-AS1, CHODL, TMPRSS15, LINC00320, NCAM2, RNU6-67P, LINC00317, LINC00308, D21S2088E, LOC339622, LINC00158, MIR155HG, MIR155, LINC00515, MRPL39, JAM2, ATP5J, GABPA, APP, CYYR1, ADAMTS1, ADAMTS5, MIR4759, MI…	TFF2, TFF1, RUNX1, TMPRSS3, CSTB, ADAMTS1, S100B, U2AF1, PTTG1IP, NRIP1, TIAM1, DYRK1A, ETS2, TFF3, MIR125B2, ERG, TMPRSS2, OLIG2	hsa-mir-3118-5, hsa-mir-99a, hsa-let-7c, hsa-mir-125b-2, hsa-mir-548x, hsa-mir-155, hsa-mir-4327, ACA67, hsa-mir-802, hsa-mir-3197		C-3ELOA	chr21:15006457-48097372
UPN6	Gain	2.53836	8	q24.3	p23.3	837	125254	146138	arr[hg19] 8p23.3q24.3(158,048-146,295,771)x2-3	RPL23AP53, ZNF596, FAM87A, FBXO25, TDRP, ERICH1, ERICH1-AS1, LOC286083, DLGAP2, CLN8, MIR596, ARHGEF10, KBTBD11, MYOM2, CSMD1, LOC100287015, MCPH1, ANGPT2, AGPAT5, MIR4659A, MIR4659B, XKR5, LOC100652791, DEFB1, DEFA6, DEFA4, DEFA8P, DEFA9P, DEFA10P, DEFA1B, DEFA1, DEFT1P, DEFT1P2, DEFA3, DEFA11P, DEFA5, LINC00965, FAM66B, DEFB109P1B, USP17L1P, USP17L4, ZNF705G, DEFB4B, DEFB103B, DEFB103A, SPAG11B…	TPD52, ASH2L, NDRG1, CTHRC1, TNKS, PSCA, GGH, FGFR1, CYP7B1, RECQL4, RUNX1T1, SNAI2, IDO2, DEFB1, EBAG9, NBN, MAFA, CTSB, WWP1, MYC, RHOBTB2, ADAM9, DLC1, COX6C, TACC1, BAALC, NKX3-1, RNF139, BOP1, PTK2, TP53INP1, ENPP2, PCM1, IDO1, RAD21, WHSC1L1, EIF4EBP1, HAS2, MYBL1, NAT1, LOXL2, NAT2, KIAA1967, MTUS1, MCPH1, CLU, WRN, PAG1, EXT1, PTK2B, CYP7A1, TOX, PLAG1, NCOA2, KAT6A, TNFRSF11B	hsa-mir-596, hsa-mir-548i-3, hsa-mir-597, hsa-mir-124-1, hsa-mir-4286, hsa-mir-1322, hsa-mir-598, hsa-mir-383, hsa-mir-548v, hsa-mir-320a, hsa-mir-548h-4, hsa-mir-4287, hsa-mir-4288, hsa-mir-3148, U13, hsa-mir-486, U54, hsa-mir-124-2, HBII-276, hsa-mir-2052, hsa-mir-3149, hsa-mir-3150, U72, hsa-mir-599, hsa-mir-875, hsa-mir-1273, hsa-mir-3151, hsa-mir-548a-3, hsa-mir-2053, hsa-mir-548d-1, hsa-mir…		C-3WEHE	chr8:158048-146295771
UPN6	Gain	2.51634	17	q25.3	p13.3	1373	73347	81041.4	arr[hg19] 17p13.3q25.3(525-81,041,938)x2-3	DOC2B, RPH3AL, LOC100506388, C17orf97, FAM101B, VPS53, FAM57A, GEMIN4, DBIL5P, GLOD4, RNMTL1, NXN, TIMM22, ABR, MIR3183, BHLHA9, TUSC5, YWHAE, CRK, MYO1C, INPP5K, PITPNA-AS1, PITPNA, SLC43A2, SCARF1, RILP, PRPF8, TLCD2, MIR22HG, MIR22, WDR81, SERPINF2, SERPINF1, SMYD4, RPA1, RTN4RL1, DPH1, OVCA2, MIR132, MIR212, HIC1, SMG6, SRR, TSR1, SNORD91B, SNORD91A, SGSM2, MNT, LOC284009, METTL16, PAFAH1B1, …	USP6, FAM57A, SLC4A1, ELAC2, IKZF3, STAT5B, ENPP7, TIMP2, GSDMA, ETV4, PPP1R1B, NMT1, MIR21, RECQL5, XAF1, AXIN2, RNF213, ST6GALNAC1, CDC6, TRAF4, AATF, KDM6B, CASC3, LASP1, GRN, ERBB2, IGF2BP1, RPL26, SPECC1, PYY, STAT3, PRKAR1A, SEPT9, NF1, FLCN, MYBBP1A, TBX2, ASPSCR1, CLTC, TRPV1, KSR1, MLLT6, HLF, RAD51D, SUZ12, MAPK7, GAS7, STARD3, TP53, GAST, TRIM37, PPM1D, MSI2, SLC9A3R1, RARA, COL1A1, WR…	hsa-mir-3183, hsa-mir-22, hsa-mir-132, hsa-mir-212, HBII-296B, HBII-296A, hsa-mir-1253, hsa-mir-195, hsa-mir-497, hsa-mir-324, ACA48, mgU6-77, U67, ACA68, hsa-mir-4314, U8, hsa-mir-744, hsa-mir-548h-3, hsa-mir-1288, U49B, U49A, HBII-135, hsa-mir-33b, U3-2, U3-2B, U3-4, U3, U3-3, hsa-mir-1180, ACA59B, U42B, mgh18S-121, U42A, Z17B, hsa-mir-451, hsa-mir-144, hsa-mir-423, hsa-mir-3184, hsa-mir-193a, …		S-4LRWR	chr17:525-81041938
UPN6	Gain	2.54961	18	q23	p11.32	342	66936	77877.9	arr[hg19] 18p11.32q23(136,226-78,014,123)x2-3	USP14, THOC1, COLEC12, CETN1, CLUL1, C18orf56, TYMS, ENOSF1, YES1, ADCYAP1, LINC00470, METTL4, NDC80, CBX3P2, SMCHD1, EMILIN2, LPIN2, LOC727896, MYOM1, MYL12A, MYL12B, TGIF1, DLGAP1, DLGAP1-AS1, DLGAP1-AS3, DLGAP1-AS4, DLGAP1-AS5, C18orf42, LINC00526, LINC00667, ZBTB14, EPB41L3, LOC645355, MIR3976, TMEM200C, L3MBTL4, MIR4317, LOC100130480, ARHGAP28, LINC00668, LAMA1, LRRC30, PTPRM, LOC100192426, …	ZNF521, SS18, RBBP8, GATA6, SMAD4, MALT1, BCL2, DSG2, MAPK4, PTPN2, SLC39A6, SMAD2, SERPINB5, SETBP1, EPB41L3, MBD2, PHLPP1, DCC	hsa-mir-4317, hsa-mir-3156-2, hsa-mir-320c-1, hsa-mir-133a-1, hsa-mir-1-2, hsa-mir-320c-2, hsa-mir-302f, hsa-mir-187, hsa-mir-4318, hsa-mir-924, hsa-mir-4319, hsa-mir-1539, U58C, U58A, U58B, mgU12-22/U4-8, U91, hsa-mir-4320, ACA37, hsa-mir-122		C-6HGFA	chr18:136226-78014123
UPN6	Gain	3	X	p22.33	p22.33	2	216	80.144	arr[hg19] Xp22.33 or Yp11.32p11.31(2,473,404-2,553,548 or 2,423,404-2,503,548)x3	CD99P1, LINC00102			C-5LZIX	C-6PYTT	chrX:2473404-2553548
UPN6	Gain	3	X	p22.33	p22.33	4	348	118.107	arr[hg19] Xp22.33 or Yp11.31(2,574,603-2,692,710 or 2,524,603-2,642,710)x3	CD99P1, CD99, XG, XGPY2			S-3PPDX	S-3HVRB	chrX:2574603-2692710
UPN6	Gain	3	X	q28	q28	2	464	252.918	arr[hg19] Xq28 or Yq12(154,946,915-155,199,833 or 59,049,921-59,302,839)x3	SPRY3, VAMP7			C-5SSAS	S-4IGFH	chrX:154946915-155199833
UPN6	Loss	0	Y	p11.2	p11.2	19	1844	2913.06	arr[hg19] Yp11.2(6,243,632-9,156,689)x0	TTTY1B, TTTY1, TTTY2, TTTY2B, TTTY21, TTTY21B, TTTY7B, TTTY7, TTTY8, TTTY8B, AMELY, TBL1Y, PRKY, TTTY16, TTTY12, TTTY18, TTTY19, TTTY11, RBMY1A3P			C-6WMTS	C-7SFSJ	chrY:6243632-9156689
UPN6	GainMosaic	2.5842	X	p22.33	p22.33	16	2872	2158.73	arr[hg19] Xp22.33 or Yp11.32(168,546-2,327,274 or 118,546-2,277,274)x2-3	PLCXD1, GTPBP6, LINC00685, PPP2R3B, SHOX, CRLF2, CSF2RA, MIR3690, IL3RA, SLC25A6, ASMTL-AS1, ASMTL, P2RY8, AKAP17A, ASMT, DHRSX	P2RY8, IL3RA, CRLF2		C-5QGHR	C-4ECYW	chrX:168546-2327274
UPN7	Loss	1	1	q23.3	q23.3	1	7.592	22	arr[hg19] 1q23.3(164,629,387-164,636,979)x1	PBX1	PBX1		C-5XBTT	C-7MMET	chr1:164629387-164636979
UPN7	Gain	2.84572	6	q27	p25.3	1220	170763	155053	arr[hg19] 6p25.3q27(156,974-170,919,482)x2-3	DUSP22, IRF4, EXOC2, HUS1B, LOC285768, FOXQ1, FOXF2, FOXC1, GMDS, LOC100508120, C6orf195, MYLK4, WRNIP1, SERPINB1, MIR4645, MGC39372, SERPINB9, SERPINB6, DKFZP686I15217, NQO2, HTATSF1P2, RIPK1, BPHL, TUBB2A, LOC100507194, TUBB2B, PSMG4, SLC22A23, PXDC1, FAM50B, PRPF4B, FAM217A, C6orf201, ECI2, CDYL, RPP40, PPP1R3G, LYRM4, MIR3691, FARS2, NRN1, F13A1, LY86-AS1, LY86, RREB1, SSR1, CAGE1, RIOK1, DSP…	HIST1H4F, PPARD, TFAP2A, IRF4, IGF2R, CD109, LIN28B, EPHA7, CEP85L, DDX43, HIST1H3F, POLH, hsa-mir-548a-2, ID4, ZFAND3, HMGA1, CDKN1A, HFE, EEF1A1, BACH2, JARID2, CTGF, MLLT4, DAXX, BAK1, AGER, CCNC, THBS2, MYB, CASP8AP2 , CITED2, DEK, CAGE1, RUNX2, NFKBIE, SESN1, MAPK13, FOXO3, RNASET2, FGFR1OP, TFEB, WISP3, IER3, LATS1, TNF, AHI1, HIST1H4G, ARMC2, CCND3, MAP3K7, SOX4, HDAC2, E2F3, PLAGL1, ECT2L…	hsa-mir-548a-1, hsa-mir-3143, U32B, hsa-mir-877, U83, U84, ACA38, U48, U52, hsa-mir-1236, hsa-mir-219-1, hsa-mir-1275, hsa-mir-586, hsa-mir-206, hsa-mir-133b, hsa-mir-548u, hsa-mir-30c-2, hsa-mir-30a, hsa-mir-4282, U50, U50B, hsa-mir-2113, hsa-mir-587, hsa-mir-548b, hsa-mir-3144, hsa-mir-588, U101, HBII-429, ACA33, hsa-mir-548a-2, hsa-mir-3145, hsa-mir-1273c, hsa-mir-1202, ACA20, ACA29, hsa-mir-1…	C-3GOBV	C-5ELRJ	chr6:156974-170919482
UPN7	Loss	1.1613	7	q36.3	p22.3	1140	159076	153640	arr[hg19] 7p22.3q36.3(43,360-159,119,707)x1-2	FAM20C, LOC100288524, LOC442497, PDGFA, FLJ44511, PRKAR1B, HEATR2, SUN1, GET4, ADAP1, COX19, CYP2W1, C7orf50, MIR339, GPR146, GPER, ZFAND2A, UNCX, MICALL2, INTS1, MAFK, TMEM184A, PSMG3, PSMG3-AS1, TFAMP1, ELFN1, MAD1L1, MIR4655, FTSJ2, NUDT1, SNX8, EIF3B, CHST12, LFNG, MIR4648, BRAT1, IQCE, TTYH3, AMZ1, GNA12, CARD11, SDK1, FOXK1, AP5Z1, MIR4656, RADIL, PAPOLB, MMD2, RNF216P1, RBAK, RBAK-RBAKDN, …	HUS1, TRB, EZH2, GRB10, HBP1, SHH, GATAD1, NRF1, ZC3HAV1, TWIST1, SPAM1, EZH2, CREB3L2, EZH2, AKAP9, MET, EZH2, RELN, NRCAM, TRB@, TRIM24, POM121, IL6, DDC, ABCB1, EPHA1, CDK6, IKZF1, THSD7A, POT1, TRPV6, JAZF1, CLDN4, STEAP2, MNX1, POU6F2, LIMK1, DMTF1, SFRP4, PEX1, PEG10, POM121C, HIP1, HOXA13, HIPK2, BRAF, TRG@, ACTB, HOXA11, COL1A2, BCL7B, HGF, STEAP1, CYP2W1, ASNS, ERVW-1, GPER, TAC1, ELN, H…	hsa-mir-339, hsa-mir-589, hsa-mir-1302-6, hsa-mir-3146, hsa-mir-1183, HBII-336, hsa-mir-148a, hsa-mir-196b, hsa-mir-550-1, hsa-mir-550-2, hsa-mir-548n, hsa-mir-1200, ACA9, ACA5, ACA5c, ACA5b, ACA15, hsa-mir-4283-1, hsa-mir-3147, hsa-mir-4283-2, ACA22, hsa-mir-4284, hsa-mir-590, ACA14a, hsa-mir-1285-1, hsa-mir-653, hsa-mir-489, hsa-mir-591, hsa-mir-25, hsa-mir-93, hsa-mir-106b, hsa-mir-4285, hsa-m…	C-7RSJF	C-7IIDC	chr7:43360-159119707
UPN7	Gain	2.84064	10	q26.3	p15.3	921	135327	133229	arr[hg19] 10p15.3q26.3(100,026-135,427,143)x2-3	ZMYND11, DIP2C, MIR5699, PRR26, LARP4B, GTPBP4, IDI2, IDI2-AS1, IDI1, WDR37, LINC00200, ADARB2, ADARB2-AS1, LINC00700, LINC00701, PFKP, PITRM1, PITRM1-AS1, KLF6, LINC00704, LINC00705, AKR1E2, AKR1C6P, AKR1C1, AKR1C2, AKR1C3, AKR1CL1, AKR1C4, UCN3, TUBAL3, NET1, CALML5, CALML3, ASB13, FAM208B, GDI2, ANKRD16, FBXO18, IL15RA, IL2RA, RBM17, PFKFB3, MIR3155A, MIR3155B, LOC399715, PRKCQ, PRKCQ-AS1, LIN…	LOXL4, EIF3A, PDCD4, SIRT1, RET, ZMIZ1, ADD3, AKR1C3, LGI1, MLLT10, FGF8, MRC1, PAX2, BAG3, DMBT1, BNIP3, BLNK, PTEN, RHOBTB1, KAT6B, TLX1, AIFM2, PSAP, LDB1, MAPK8, NT5C2, NET1, ARID5B, ERCC6, HTRA1, BMI1, NCOA4, TET1, CCDC6, MXI1, DKK1, KLF6, ABI1, SNCG, BTRC, NFKB2, GATA3, ALOX5, FGFR2, ADAM12	hsa-mir-3155, hsa-mir-548q, hsa-mir-4293, hsa-mir-1265, hsa-mir-511-1, hsa-mir-511-2, hsa-mir-1915, hsa-mir-603, hsa-mir-604, hsa-mir-938, hsa-mir-3156-1, hsa-mir-4294, hsa-mir-605, hsa-mir-548f-1, hsa-mir-1296, HBII-419, hsa-mir-1254, hsa-mir-606, hsa-mir-346, hsa-mir-107, hsa-mir-3157, hsa-mir-607, hsa-mir-1287, U108, hsa-mir-608, hsa-mir-3158-1, hsa-mir-3158-2, hsa-mir-146b, hsa-mir-1307, hsa-…	C-4CDQJ	C-5DPFD	chr10:100026-135427143
UPN7	Loss	1	1	q23.3	q23.3	1	7.592	22	arr[hg19] 1q23.3(164,629,387-164,636,979)x1	PBX1	PBX1		C-5XBTT	C-7MMET	chr1:164629387-164636979
UPN7	Gain	2.84572	6	q27	p25.3	1220	170763	155053	arr[hg19] 6p25.3q27(156,974-170,919,482)x2-3	DUSP22, IRF4, EXOC2, HUS1B, LOC285768, FOXQ1, FOXF2, FOXC1, GMDS, LOC100508120, C6orf195, MYLK4, WRNIP1, SERPINB1, MIR4645, MGC39372, SERPINB9, SERPINB6, DKFZP686I15217, NQO2, HTATSF1P2, RIPK1, BPHL, TUBB2A, LOC100507194, TUBB2B, PSMG4, SLC22A23, PXDC1, FAM50B, PRPF4B, FAM217A, C6orf201, ECI2, CDYL, RPP40, PPP1R3G, LYRM4, MIR3691, FARS2, NRN1, F13A1, LY86-AS1, LY86, RREB1, SSR1, CAGE1, RIOK1, DSP…	HIST1H4F, PPARD, TFAP2A, IRF4, IGF2R, CD109, LIN28B, EPHA7, CEP85L, DDX43, HIST1H3F, POLH, hsa-mir-548a-2, ID4, ZFAND3, HMGA1, CDKN1A, HFE, EEF1A1, BACH2, JARID2, CTGF, MLLT4, DAXX, BAK1, AGER, CCNC, THBS2, MYB, CASP8AP2 , CITED2, DEK, CAGE1, RUNX2, NFKBIE, SESN1, MAPK13, FOXO3, RNASET2, FGFR1OP, TFEB, WISP3, IER3, LATS1, TNF, AHI1, HIST1H4G, ARMC2, CCND3, MAP3K7, SOX4, HDAC2, E2F3, PLAGL1, ECT2L…	hsa-mir-548a-1, hsa-mir-3143, U32B, hsa-mir-877, U83, U84, ACA38, U48, U52, hsa-mir-1236, hsa-mir-219-1, hsa-mir-1275, hsa-mir-586, hsa-mir-206, hsa-mir-133b, hsa-mir-548u, hsa-mir-30c-2, hsa-mir-30a, hsa-mir-4282, U50, U50B, hsa-mir-2113, hsa-mir-587, hsa-mir-548b, hsa-mir-3144, hsa-mir-588, U101, HBII-429, ACA33, hsa-mir-548a-2, hsa-mir-3145, hsa-mir-1273c, hsa-mir-1202, ACA20, ACA29, hsa-mir-1…	C-3GOBV	C-5ELRJ	chr6:156974-170919482
UPN7	Loss	1.1613	7	q36.3	p22.3	1140	159076	153640	arr[hg19] 7p22.3q36.3(43,360-159,119,707)x1-2	FAM20C, LOC100288524, LOC442497, PDGFA, FLJ44511, PRKAR1B, HEATR2, SUN1, GET4, ADAP1, COX19, CYP2W1, C7orf50, MIR339, GPR146, GPER, ZFAND2A, UNCX, MICALL2, INTS1, MAFK, TMEM184A, PSMG3, PSMG3-AS1, TFAMP1, ELFN1, MAD1L1, MIR4655, FTSJ2, NUDT1, SNX8, EIF3B, CHST12, LFNG, MIR4648, BRAT1, IQCE, TTYH3, AMZ1, GNA12, CARD11, SDK1, FOXK1, AP5Z1, MIR4656, RADIL, PAPOLB, MMD2, RNF216P1, RBAK, RBAK-RBAKDN, …	HUS1, TRB, EZH2, GRB10, HBP1, SHH, GATAD1, NRF1, ZC3HAV1, TWIST1, SPAM1, EZH2, CREB3L2, EZH2, AKAP9, MET, EZH2, RELN, NRCAM, TRB@, TRIM24, POM121, IL6, DDC, ABCB1, EPHA1, CDK6, IKZF1, THSD7A, POT1, TRPV6, JAZF1, CLDN4, STEAP2, MNX1, POU6F2, LIMK1, DMTF1, SFRP4, PEX1, PEG10, POM121C, HIP1, HOXA13, HIPK2, BRAF, TRG@, ACTB, HOXA11, COL1A2, BCL7B, HGF, STEAP1, CYP2W1, ASNS, ERVW-1, GPER, TAC1, ELN, H…	hsa-mir-339, hsa-mir-589, hsa-mir-1302-6, hsa-mir-3146, hsa-mir-1183, HBII-336, hsa-mir-148a, hsa-mir-196b, hsa-mir-550-1, hsa-mir-550-2, hsa-mir-548n, hsa-mir-1200, ACA9, ACA5, ACA5c, ACA5b, ACA15, hsa-mir-4283-1, hsa-mir-3147, hsa-mir-4283-2, ACA22, hsa-mir-4284, hsa-mir-590, ACA14a, hsa-mir-1285-1, hsa-mir-653, hsa-mir-489, hsa-mir-591, hsa-mir-25, hsa-mir-93, hsa-mir-106b, hsa-mir-4285, hsa-m…	C-7RSJF	C-7IIDC	chr7:43360-159119707
UPN7	Gain	2.84064	10	q26.3	p15.3	921	135327	133229	arr[hg19] 10p15.3q26.3(100,026-135,427,143)x2-3	ZMYND11, DIP2C, MIR5699, PRR26, LARP4B, GTPBP4, IDI2, IDI2-AS1, IDI1, WDR37, LINC00200, ADARB2, ADARB2-AS1, LINC00700, LINC00701, PFKP, PITRM1, PITRM1-AS1, KLF6, LINC00704, LINC00705, AKR1E2, AKR1C6P, AKR1C1, AKR1C2, AKR1C3, AKR1CL1, AKR1C4, UCN3, TUBAL3, NET1, CALML5, CALML3, ASB13, FAM208B, GDI2, ANKRD16, FBXO18, IL15RA, IL2RA, RBM17, PFKFB3, MIR3155A, MIR3155B, LOC399715, PRKCQ, PRKCQ-AS1, LIN…	LOXL4, EIF3A, PDCD4, SIRT1, RET, ZMIZ1, ADD3, AKR1C3, LGI1, MLLT10, FGF8, MRC1, PAX2, BAG3, DMBT1, BNIP3, BLNK, PTEN, RHOBTB1, KAT6B, TLX1, AIFM2, PSAP, LDB1, MAPK8, NT5C2, NET1, ARID5B, ERCC6, HTRA1, BMI1, NCOA4, TET1, CCDC6, MXI1, DKK1, KLF6, ABI1, SNCG, BTRC, NFKB2, GATA3, ALOX5, FGFR2, ADAM12	hsa-mir-3155, hsa-mir-548q, hsa-mir-4293, hsa-mir-1265, hsa-mir-511-1, hsa-mir-511-2, hsa-mir-1915, hsa-mir-603, hsa-mir-604, hsa-mir-938, hsa-mir-3156-1, hsa-mir-4294, hsa-mir-605, hsa-mir-548f-1, hsa-mir-1296, HBII-419, hsa-mir-1254, hsa-mir-606, hsa-mir-346, hsa-mir-107, hsa-mir-3157, hsa-mir-607, hsa-mir-1287, U108, hsa-mir-608, hsa-mir-3158-1, hsa-mir-3158-2, hsa-mir-146b, hsa-mir-1307, hsa-…	C-4CDQJ	C-5DPFD	chr10:100026-135427143
UPN7	LOH		10	q24.2	q23.33	60	4631.44	1045	arr[hg19] 10q23.33q24.2(95,747,475-100,378,911) hmz	PLCE1, PLCE1-AS1, NOC3L, TBC1D12, HELLS, CYP2C18, CYP2C19, CYP2C9, CYP2C8, C10orf129, PDLIM1, SORBS1, ALDH18A1, TCTN3, ENTPD1, ENTPD1-AS1, C10orf131, CC2D2B, CCNJ, MIR3157, ZNF518A, BLNK, DNTT, OPALIN, TLL2, TM9SF3, PIK3AP1, LCOR, C10orf12, SLIT1, LOC100505540, ARHGAP19-SLIT1, ARHGAP19, FRAT1, FRAT2, RRP12, PGAM1, EXOSC1, ZDHHC16, MMS19, UBTD1, ANKRD2, HOGA1, C10orf62, MIR5692C2, MORN4, PI4K2A, A…	LOXL4, BLNK	hsa-mir-3157, hsa-mir-607, hsa-mir-1287	S-4BVIV	S-4CORW	chr10:95747475-100378911
UPN7	Gain	2.81593	11	q25	p15.5	1459	134708	136510	arr[hg19] 11p15.5q25(230,615-134,938,470)x2-3	SIRT3, PSMD13, NLRP6, ATHL1, IFITM5, IFITM2, IFITM1, IFITM3, B4GALNT4, PKP3, SIGIRR, ANO9, PTDSS2, RNH1, HRAS, LRRC56, C11orf35, RASSF7, MIR210HG, MIR210, LOC143666, PHRF1, IRF7, CDHR5, SCT, DRD4, DEAF1, TMEM80, EPS8L2, TALDO1, PDDC1, NS3BP, CEND1, SLC25A22, PIDD, RPLP2, SNORA52, PNPLA2, EFCAB4A, CD151, POLR2L, TSPAN4, CHID1, AP2A2, MUC6, MUC2, MUC5B, TOLLIP, TOLLIP-AS1, BRSK2, MOB2, DUSP8, KRTAP…	INPPL1, KIAA1549L (C11orf41), BAD, B3GNT6, PLCB3, SPI1, DNAJC4, TAGLN, MUC6, BIRC2, ARHGEF12, YAP1, NUDT22, THY1, RRM1, SIPA1, C11orf30, NUP98, NUMA1, THRSP, RAD9A, MIR125B1, FLI1, HTATIP2, ESRRA, CBL, CTNND1, FEN1, NEU3, LMO1, NNMT, TMPRSS4, HRAS, PPP1R14B, POU2AF1, CD248, ETS1, CST6, EED, RSF1, STIP1, DDX10, H2AFX, DDB2, SPA17, PAX6, RAG2, EXT2, CCND1, ATM, FERMT3, EIF3F, RAG1, NPAT, CHKA, TRPT…	hsa-mir-210, ACA52, hsa-mir-4298, hsa-mir-675, hsa-mir-483, ACA54, hsa-mir-302e, ACA3, ACA3-2, ACA23, U97, hsa-mir-4299, U14B, U14A, hsa-mir-3159, hsa-mir-610, hsa-mir-670, hsa-mir-129-2, hsa-mir-3160-1, hsa-mir-3160-2, HBII-166, hsa-mir-3161, hsa-mir-130a, hsa-mir-3162, hsa-mir-611, hsa-mir-1908, U99, U22, U31, U30, U29, U28, U27, U26, U25, hsa-mir-1237, hsa-mir-192, hsa-mir-194-2, hsa-mir-612, …	C-4LXKK	S-3EDHX	chr11:230615-134938470
UPN7	Gain	2.80626	14	q32.33	q11.2	770	86773.8	85690	arr[hg19] 14q11.2q32.33(20,511,672-107,285,437)x2-3	OR4L1, OR4K17, OR4N5, OR11G2, OR11H6, OR11H4, TTC5, CCNB1IP1, SNORD126, RPPH1, PARP2, TEP1, KLHL33, OSGEP, APEX1, TMEM55B, PNP, RNASE10, RNASE9, RNASE11, RNASE12, OR6S1, ANG, RNASE4, EDDM3A, EDDM3B, RNASE6, RNASE1, RNASE3, ECRP, RNASE2, METTL17, SLC39A2, NDRG2, TPPP2, RNASE13, RNASE7, RNASE8, ARHGEF40, ZNF219, TMEM253, OR5AU1, LINC00641, HNRNPC, RPGRIP1, SUPT16H, CHD8, SNORD9, SNORD8, RAB2B, TOX4…	TRIP11, NKX2-1, TCL6, VRK1, MTA1, PRKD1, SAV1, JAG2, ESR2, BCL11B, GPHN, AKT1, DPF3, NUMB, TSHR, PAX9, DIO2, EML1, IGH@, TRD@, TCL1B, ANG, MMP14, XRCC3, ZFP36L1, TCL1A, TRA@, PTPN21, NDRG2, FUT8, TRA, SEL1L, GPR68, MEG3, OTX2, LGALS3, NIN, FOXA1, TRD, SIX1, TRAF3, STRN3, IGH	hsa-mir-1201, SNORD126, mgU6-53B, mgU6-53, hsa-mir-208a, hsa-mir-208b, hsa-mir-4307, hsa-mir-3171, hsa-mir-624, hsa-mir-3172, SNORD127, hsa-mir-4308, hsa-mir-548h-1, hsa-mir-625, hsa-mir-1260, ACA65, SNORA11B, hsa-mir-3173, U93, hsa-mir-342, hsa-mir-345, hsa-mir-770, hsa-mir-493, hsa-mir-337, hsa-mir-665, hsa-mir-431, hsa-mir-433, hsa-mir-127, hsa-mir-432, hsa-mir-136, 14q(0), hsa-mir-370, 14q(I-…	S-4ETOO	S-3HXYB	chr14:20511672-107285437
UPN7	Gain	4	21	q22.3	q11.2	293	33090.9	33620	arr[hg19] 21q11.2q22.3(15,006,457-48,097,372)x4	POTED, C21orf15, ANKRD20A11P, LIPI, RBM11, ABCC13, HSPA13, SAMSN1, SAMSN1-AS1, LOC388813, NRIP1, USP25, LINC00478, MIR99A, MIRLET7C, MIR125B2, C21orf37, CXADR, BTG3, C21orf91-OT1, C21orf91, CHODL-AS1, CHODL, TMPRSS15, LINC00320, NCAM2, RNU6-67P, LINC00317, LINC00308, D21S2088E, LOC339622, LINC00158, MIR155HG, MIR155, LINC00515, MRPL39, JAM2, ATP5J, GABPA, APP, CYYR1, ADAMTS1, ADAMTS5, MIR4759, MI…	PTTG1IP, MIR125B2, OLIG2, TFF1, ETS2, S100B, CSTB, RUNX1, U2AF1, TFF3, NRIP1, DYRK1A, TMPRSS3, TMPRSS2, ERG, TFF2, TIAM1, ADAMTS1	hsa-mir-3118-5, hsa-mir-99a, hsa-let-7c, hsa-mir-125b-2, hsa-mir-548x, hsa-mir-155, hsa-mir-4327, ACA67, hsa-mir-802, hsa-mir-3197	C-6OPRF	C-3ELOA	chr21:15006457-48097372
UPN7	Gain	3	X	p22.33	p22.33	1	214.84	333	arr[hg19] Xp22.33(320,324-535,164)x3	PPP2R3B			C-7FAUN	C-4SHHD	chrX:320324-535164
UPN7	Gain	3	X	q28	p22.33	1016	154698	189386	arr[hg19] Xp22.33q28(535,234-155,233,731)x3	SHOX, CRLF2, CSF2RA, MIR3690, IL3RA, SLC25A6, ASMTL-AS1, ASMTL, P2RY8, AKAP17A, ASMT, DHRSX, ZBED1, CD99P1, LINC00102, CD99, XG, XGPY2, GYG2, ARSD, ARSE, ARSH, ARSF, CXorf28, MXRA5, PRKX, LOC389906, NLGN4X, MIR4770, VCX3A, HDHD1, MIR4767, STS, VCX, PNPLA4, MIR651, VCX2, VCX3B, KAL1, FAM9A, FAM9B, TBL1X, GPR143, SHROOM2, LOC100288814, WWC3, CLCN4, MID1, HCCS, ARHGAP6, AMELX, MSL3, FRMPD4, PRPS2, T…	ZRSR2, PHF6, SSX2, ARMCX1, IL3RA, ARMCX2, ZBTB33, ARMCX3, P2RY8, REPS2, TFE3, FOXP3, RHOXF2, ELF4, MIR221, BRWD3, SEPT6, FOXO4, BTK, KDM6A, RBBP7, FAM123B, AMOT, DACH2, MTCP1, Sep.06, MIR222, AR, SPANXA1, CRLF2, L1CAM, NONO, AIFM1, GATA1, DKC1, MSN, CXCR3, RPL10, BCOR, GPC3, STAG2	hsa-mir-651, hsa-mir-1308, ACA12, hsa-mir-548f-5, hsa-mir-221, hsa-mir-222, SNORA11C, hsa-mir-532, hsa-mir-188, hsa-mir-500, hsa-mir-362, hsa-mir-501, hsa-mir-500b, hsa-mir-660, hsa-mir-502, SNORA11E, SNORA11D, hsa-mir-98, hsa-let-7f-2, U107, hsa-mir-1468, hsa-mir-223, hsa-mir-421, hsa-mir-374b, hsa-mir-545, hsa-mir-374a, hsa-mir-384, hsa-mir-325, hsa-mir-4328, hsa-mir-548i-4, hsa-mir-1321, hsa-m…	C-4RSRX	C-6KTXX	chrX:535234-155233731
UPN7	LOH		X	q26.1	q25	16	3445.08	517	arr[hg19] Xq25q26.1(126,160,188-129,605,268) hmz	ACTRT1, SMARCA1, OCRL, APLN, XPNPEP2, SASH3, ZDHHC9, UTP14A, BCORL1, ELF4, AIFM1, RAB33A, ZNF280C, SLC25A14, GPR119, RBMX2	ELF4, AIFM1		S-3UBKT	S-3SVTI	chrX:126160188-129605268
UPN7	LOH		X	q26.3	q26.2	54	3216.22	374	arr[hg19] Xq26.2q26.3(132,839,075-136,055,295) hmz	GPC3, MIR363, MIR92A2, MIR19B2, MIR20B, MIR18B, MIR106A, CCDC160, PHF6, HPRT1, MIR450B, MIR450A1, MIR450A2, MIR542, MIR503HG, MIR503, MIR424, LINC00629, PLAC1, FAM122B, FAM122C, MOSPD1, SMIM10, FAM127C, FAM127A, FAM127B, LINC00087, LINC00633, CXorf48, ZNF75D, ZNF449, LINC00086, DDX26B, CT45A1, CT45A2, CT45A4, CT45A3, CT45A5, CT45A6, SAGE1, MMGT1, SLC9A6, FHL1, MAP7D3, GPR112, BRS3, HTATSF1, VGLL1…	PHF6, GPC3	hsa-mir-363, hsa-mir-92a-2, hsa-mir-19b-2, hsa-mir-20b, hsa-mir-18b, hsa-mir-106a, hsa-mir-450b, hsa-mir-450a-1, hsa-mir-450a-2, hsa-mir-542, hsa-mir-503, hsa-mir-424, hsa-mir-934, U61	S-4RDPI	S-4BADC	chrX:132839075-136055295
UPN8	Gain	3	7	p12.2	p22.3	344	50281.7	51535	arr[hg19] 7p22.3p12.2(65,577-50,347,237)x3	FAM20C, LOC100288524, LOC442497, PDGFA, FLJ44511, PRKAR1B, HEATR2, SUN1, GET4, ADAP1, COX19, CYP2W1, C7orf50, MIR339, GPR146, GPER, ZFAND2A, UNCX, MICALL2, INTS1, MAFK, TMEM184A, PSMG3, PSMG3-AS1, TFAMP1, ELFN1, MAD1L1, MIR4655, FTSJ2, NUDT1, SNX8, EIF3B, CHST12, LFNG, MIR4648, BRAT1, IQCE, TTYH3, AMZ1, GNA12, CARD11, SDK1, FOXK1, AP5Z1, MIR4656, RADIL, PAPOLB, MMD2, RNF216P1, RBAK, RBAK-RBAKDN, …	ACTB, HOXA11, ABCB5, THSD7A, JAZF1, IL6, POU6F2, HOXA9, FSCN1, SFRP4, TRG@, GPNMB, NPY, GPER, ANLN, CYP2W1, HOXA13, HUS1, TWIST1, IKZF1	hsa-mir-339, hsa-mir-589, hsa-mir-1302-6, hsa-mir-3146, hsa-mir-1183, HBII-336, hsa-mir-148a, hsa-mir-196b, hsa-mir-550-1, hsa-mir-550-2, hsa-mir-548n, hsa-mir-1200, ACA9, ACA5, ACA5c, ACA5b	C-3XHLH	C-3GFBN	chr7:65577-50347237
UPN8	Loss	2	7	p12.2	p12.2	1	119.168	176	arr[hg19] 7p12.2(50,350,199-50,469,367)x2	IKZF1	IKZF1		C-6SSTP	C-5WNSC	chr7:50350199-50469367
UPN8	Gain	3	7	q36.3	p12.2	797	108648	101912	arr[hg19] 7p12.2q36.3(50,471,578-159,119,707)x3	IKZF1, FIGNL1, DDC, LOC100129427, GRB10, COBL, POM121L12, FLJ45974, HPVC1, VSTM2A, LOC285878, SEC61G, EGFR, EGFR-AS1, LANCL2, VOPP1, FKBP9L, SEPT14, ZNF713, MRPS17, GBAS, PSPH, CCT6A, SNORA15, SUMF2, PHKG1, CHCHD2, NUPR1L, LOC650226, DKFZp434L192, LOC100130849, MIR4283-2, MIR4283-1, ZNF479, GUSBP10, MIR3147, ZNF716, ZNF733P, LOC100287704, LOC100287834, LOC100506050, ZNF727, ZNF735, ZNF679, ZNF736…	ZC3HAV1, CREB3L2, EPHA1, POT1, COL1A2, TAC1, EZH2, STEAP1, POM121, PEG10, NRCAM, EZH2, ABCB1, ELN, TRIM24, DDC, GRB10, TRPV6, TRB, PEX1, TRB@, SPAM1, ERVW-1, EZH2, MET, POM121C, EZH2, HGF, HIPK2, MNX1, TTC26, NRF1, GATAD1, AUTS2, CAV1, HSPB1, CLDN4, MUC17, CDK6, BRAF, STEAP2, RELN, HBP1, AKAP9, HIP1, BCL7B, SHH, LIMK1, DMTF1, ASNS, IKZF1	ACA15, hsa-mir-4283-1, hsa-mir-3147, hsa-mir-4283-2, ACA22, hsa-mir-4284, hsa-mir-590, ACA14a, hsa-mir-1285-1, hsa-mir-653, hsa-mir-489, hsa-mir-591, hsa-mir-25, hsa-mir-93, hsa-mir-106b, hsa-mir-4285, hsa-mir-548o, hsa-mir-592, hsa-mir-593, hsa-mir-129-1, hsa-mir-182, hsa-mir-96, hsa-mir-183, hsa-mir-335, hsa-mir-29a, hsa-mir-29b-1, hsa-mir-490, hsa-mir-548f-4, hsa-mir-1975, hsa-mir-671, hsa-mir…	C-4VNDP	C-7IIDC	chr7:50471578-159119707
UPN8	Gain	3	8	q24.3	p23.3	837	146138	125254	arr[hg19] 8p23.3q24.3(158,048-146,295,771)x3	RPL23AP53, ZNF596, FAM87A, FBXO25, TDRP, ERICH1, ERICH1-AS1, LOC286083, DLGAP2, CLN8, MIR596, ARHGEF10, KBTBD11, MYOM2, CSMD1, LOC100287015, MCPH1, ANGPT2, AGPAT5, MIR4659A, MIR4659B, XKR5, LOC100652791, DEFB1, DEFA6, DEFA4, DEFA8P, DEFA9P, DEFA10P, DEFA1B, DEFA1, DEFT1P2, DEFT1P, DEFA3, DEFA11P, DEFA5, LINC00965, FAM66B, DEFB109P1B, USP17L1P, USP17L4, ZNF705G, DEFB4B, DEFB103B, DEFB103A, SPAG11B…	CYP7B1, PLAG1, EBAG9, RECQL4, MAFA, CLU, DLC1, CYP7A1, TPD52, KIAA1967, EIF4EBP1, DEFB1, NCOA2, RUNX1T1, MCPH1, BOP1, TOX, GGH, ASH2L, KAT6A, ADAM9, MYBL1, MYC, RNF139, PCM1, NKX3-1, WWP1, NDRG1, PAG1, CTHRC1, MTUS1, BAALC, TNFRSF11B, COX6C, WRN, IDO1, TACC1, WHSC1L1, CTSB, RHOBTB2, IDO2, TP53INP1, ENPP2, TNKS, EXT1, NBN, PTK2, SNAI2, PSCA, FGFR1, RAD21, NAT1, HAS2, NAT2, LOXL2, PTK2B	hsa-mir-596, hsa-mir-548i-3, hsa-mir-597, hsa-mir-124-1, hsa-mir-4286, hsa-mir-1322, hsa-mir-598, hsa-mir-383, hsa-mir-548v, hsa-mir-320a, hsa-mir-548h-4, hsa-mir-4287, hsa-mir-4288, hsa-mir-3148, U13, hsa-mir-486, U54, hsa-mir-124-2, HBII-276, hsa-mir-2052, hsa-mir-3149, hsa-mir-3150, U72, hsa-mir-599, hsa-mir-875, hsa-mir-1273, hsa-mir-3151, hsa-mir-548a-3, hsa-mir-2053, hsa-mir-548d-1, hsa-mir…		C-3WEHE	chr8:158048-146295771
UPN8	Gain	3	9	p13.2	p24.3	217	36675.8	35008	arr[hg19] 9p24.3p13.2(203,861-36,879,709)x3	C9orf66, DOCK8, KANK1, DMRT1, DMRT3, DMRT2, SMARCA2, FLJ35024, VLDLR, KCNV2, KIAA0020, RFX3, GLIS3, GLIS3-AS1, SLC1A1, SPATA6L, PPAPDC2, CDC37L1, AK3, RCL1, MIR101-2, JAK2, INSL6, INSL4, RLN2, RLN1, PLGRKT, CD274, PDCD1LG2, KIAA1432, ERMP1, MLANA, KIAA2026, MIR4665, RANBP6, IL33, TPD52L3, UHRF2, GLDC, KDM4C, C9orf123, PTPRD, TYRP1, LURAP1L, MPDZ, FLJ41200, LINC00583, NFIB, ZDHHC21, CER1, FREM1, L…	RMRP, CDKN2A, SH3GL2, RLN2, IFNA1, FANCG, PTPRD, SIGMAR1, MLLT3, STOML2, JAK2, TOPORS, KDM4C, PSIP1, TEK, CDKN2B, MTAP, BAG1, IL11RA, CCL27, MLLT3 (AF9), PAX5	hsa-mir-101-2, hsa-mir-3152, U92, hsa-mir-491, hsa-mir-31, hsa-mir-876, hsa-mir-873, SNORD121B, SNORD121A	C-6JAPU	C-7CLOA	chr9:203861-36879709
UPN8	Loss	1	9	p13.2	p13.2	1	92.076	168	arr[hg19] 9p13.2(36,928,912-37,020,988)x1	PAX5	PAX5		C-5SPPQ	C-3NGWX	chr9:36928912-37020988
UPN8	Gain	3	9	q34.3	q13	691	72727.2	62887	arr[hg19] 9q13q34.3(68,293,216-141,020,389)x3	LOC642236, LOC100132352, PGM5P2, LOC440896, FOXD4L6, CBWD6, ANKRD20A4, LOC100133920, FOXD4L5, FOXD4L4, FOXD4L2, CBWD3, CBWD5, FOXD4L3, PGM5-AS1, PGM5, TMEM252, PIP5K1B, FAM122A, PRKACG, FXN, TJP2, BANCR, FAM189A2, APBA1, PTAR1, C9orf135-AS1, C9orf135, MAMDC2, MAMDC2-AS1, SMC5-AS1, SMC5, KLF9, TRPM3, MIR204, TMEM2, ABHD17B, C9orf85, C9orf57, GDA, ZFAND5, TMC1, ALDH1A1, ANXA1, RORB, TRPM6, C9orf40,…	CNTRL, CDK20, RAPGEF1, GFI1B, TAL2, PAEP, NR4A3, DAPK1, HSPA5, PTCH1, NOTCH1, MIR7-1, CKS2, XPA, NTRK2, WNK2, GNAQ, FANCC, FOXE1, NUP214, TNC, CTSL1, SYK, PRRX2, HNRNPK, TNFSF15, FNBP1, DAB2IP, PPP2R4, KLF4, ANXA1, SEMA4D, SET, ALDOB, MIR126, TSC1, LPAR1, ABL1, TJP2, ROR2, TXN, FAM22F	hsa-mir-1299, hsa-mir-204, hsa-mir-7-1, hsa-mir-4289, hsa-mir-3153, hsa-mir-4290, SNORA84, hsa-mir-4291, hsa-let-7a-1, hsa-let-7f-1, hsa-let-7d, hsa-mir-2278, hsa-mir-23b, hsa-mir-27b, hsa-mir-3074, hsa-mir-24-1, hsa-mir-1302-8, hsa-mir-32, hsa-mir-455, U70C, hsa-mir-147, HBII-295, hsa-mir-600, hsa-mir-601, hsa-mir-181a-2, hsa-mir-181b-2, U65, hsa-mir-2861, hsa-mir-199b, hsa-mir-3154, hsa-mir-219…	C-4MOXS	C-5LURI	chr9:68293216-141020389
UPN8	Gain	3	10	q26.3	p15.3	921	135327	133229	arr[hg19] 10p15.3q26.3(100,026-135,427,143)x3	ZMYND11, DIP2C, MIR5699, PRR26, LARP4B, GTPBP4, IDI2, IDI2-AS1, IDI1, WDR37, LINC00200, ADARB2, ADARB2-AS1, LINC00700, LINC00701, PFKP, PITRM1, PITRM1-AS1, KLF6, LINC00704, LINC00705, AKR1E2, AKR1C6P, AKR1C1, AKR1C2, AKR1C3, AKR1CL1, AKR1C4, UCN3, TUBAL3, NET1, CALML5, CALML3, ASB13, FAM208B, GDI2, ANKRD16, FBXO18, IL15RA, IL2RA, RBM17, PFKFB3, MIR3155A, MIR3155B, LOC399715, PRKCQ, PRKCQ-AS1, LIN…	CCDC6, ZMIZ1, BTRC, FGFR2, ARID5B, AIFM2, RHOBTB1, BNIP3, HTRA1, BAG3, NET1, ALOX5, TLX1, MXI1, DMBT1, GATA3, ERCC6, SNCG, PDCD4, MAPK8, DKK1, SIRT1, KLF6, NCOA4, PTEN, ADD3, MLLT10, NT5C2, LDB1, BMI1, LOXL4, EIF3A, AKR1C3, KAT6B, ADAM12, PSAP, ABI1, BLNK, NFKB2, MRC1, TET1, RET, LGI1, PAX2, FGF8	hsa-mir-3155, hsa-mir-548q, hsa-mir-4293, hsa-mir-1265, hsa-mir-511-1, hsa-mir-511-2, hsa-mir-1915, hsa-mir-603, hsa-mir-604, hsa-mir-938, hsa-mir-3156-1, hsa-mir-4294, hsa-mir-605, hsa-mir-548f-1, hsa-mir-1296, HBII-419, hsa-mir-1254, hsa-mir-606, hsa-mir-346, hsa-mir-107, hsa-mir-3157, hsa-mir-607, hsa-mir-1287, U108, hsa-mir-608, hsa-mir-3158-1, hsa-mir-3158-2, hsa-mir-146b, hsa-mir-1307, hsa-…		C-5DPFD	chr10:100026-135427143
UPN8	Gain	3	11	q25	p15.5	1459	134708	136510	arr[hg19] 11p15.5q25(230,615-134,938,470)x3	SIRT3, PSMD13, NLRP6, ATHL1, IFITM5, IFITM2, IFITM1, IFITM3, B4GALNT4, PKP3, SIGIRR, ANO9, PTDSS2, RNH1, HRAS, LRRC56, C11orf35, RASSF7, MIR210HG, MIR210, LOC143666, PHRF1, IRF7, CDHR5, SCT, DRD4, DEAF1, TMEM80, EPS8L2, TALDO1, PDDC1, NS3BP, CEND1, SLC25A22, PIDD, RPLP2, SNORA52, PNPLA2, EFCAB4A, CD151, POLR2L, TSPAN4, CHID1, AP2A2, MUC6, MUC2, MUC5B, TOLLIP, TOLLIP-AS1, BRSK2, MOB2, DUSP8, KRTAP…	GAB2, MEN1, CD248, OPCML, MAML2, RAB39, MRE11A, PLCB3, ORAOV1, YAP1, NUDT22, KIAA1549L (C11orf41), FANCF, NEU3, RELA, PICALM, KAT5, CD44, CASP1, C11orf30, TRPT1, CLP1, MIR125B1, DNAJC4, PAX6, MACROD1, KMT2A, FKBP2, POU2AF1, HRAS, FERMT3, LRP5, LMO2, THRSP, PPP1R14B, MUC2, FEN1, NUMA1, WT1, PAK1, ARHGAP20, CRYAB, FAU, ARHGEF12, H2AFX, CHKA, RRM1, PTPRJ, BAD, THY1, CTNND1, RAD9A, MUC6, ESRRA, NUP98…	hsa-mir-210, ACA52, hsa-mir-4298, hsa-mir-675, hsa-mir-483, ACA54, hsa-mir-302e, ACA3, ACA3-2, ACA23, U97, hsa-mir-4299, U14B, U14A, hsa-mir-3159, hsa-mir-610, hsa-mir-670, hsa-mir-129-2, hsa-mir-3160-1, hsa-mir-3160-2, HBII-166, hsa-mir-3161, hsa-mir-130a, hsa-mir-3162, hsa-mir-611, hsa-mir-1908, U99, U22, U31, U30, U29, U28, U27, U26, U25, hsa-mir-1237, hsa-mir-192, hsa-mir-194-2, hsa-mir-612, …		S-3EDHX	chr11:230615-134938470
UPN8	Gain	3	14	q32.33	q11.2	770	86773.8	85690	arr[hg19] 14q11.2q32.33(20,511,672-107,285,437)x3	OR4L1, OR4K17, OR4N5, OR11G2, OR11H6, OR11H4, TTC5, CCNB1IP1, SNORD126, RPPH1, PARP2, TEP1, KLHL33, OSGEP, APEX1, TMEM55B, PNP, RNASE10, RNASE9, RNASE11, RNASE12, OR6S1, ANG, RNASE4, EDDM3A, EDDM3B, RNASE6, RNASE1, RNASE3, ECRP, RNASE2, METTL17, SLC39A2, NDRG2, TPPP2, RNASE13, RNASE7, RNASE8, ARHGEF40, ZNF219, TMEM253, OR5AU1, LINC00641, HNRNPC, RPGRIP1, SUPT16H, CHD8, SNORD9, SNORD8, RAB2B, TOX4…	DPF3, IGH@, SAV1, FUT8, TCL1B, TCL1A, NDRG2, EML1, MTA1, STRN3, FOXA1, TRD@, GPR68, PRKD1, XRCC3, PAX9, SIX1, PTPN21, TRA, TRD, BCL11B, NIN, NUMB, ANG, MEG3, TRIP11, TCL6, LGALS3, TSHR, TRAF3, AKT1, MMP14, NKX2-1, OTX2, DIO2, VRK1, GPHN, JAG2, ESR2, SEL1L, TRA@, ZFP36L1, IGH	hsa-mir-1201, SNORD126, mgU6-53B, mgU6-53, hsa-mir-208a, hsa-mir-208b, hsa-mir-4307, hsa-mir-3171, hsa-mir-624, hsa-mir-3172, SNORD127, hsa-mir-4308, hsa-mir-548h-1, hsa-mir-625, hsa-mir-1260, ACA65, SNORA11B, hsa-mir-3173, U93, hsa-mir-342, hsa-mir-345, hsa-mir-770, hsa-mir-493, hsa-mir-337, hsa-mir-665, hsa-mir-431, hsa-mir-433, hsa-mir-127, hsa-mir-432, hsa-mir-136, 14q(0), hsa-mir-370, 14q(I-…	S-4ETOO	S-3HXYB	chr14:20511672-107285437
UPN8	Gain	3	18	q23	p11.32	342	77877.9	66936	arr[hg19] 18p11.32q23(136,226-78,014,123)x3	USP14, THOC1, COLEC12, CETN1, CLUL1, C18orf56, TYMS, ENOSF1, YES1, ADCYAP1, LINC00470, METTL4, NDC80, CBX3P2, SMCHD1, EMILIN2, LPIN2, LOC727896, MYOM1, MYL12A, MYL12B, TGIF1, DLGAP1, DLGAP1-AS1, DLGAP1-AS3, DLGAP1-AS4, DLGAP1-AS5, C18orf42, LINC00526, LINC00667, ZBTB14, EPB41L3, LOC645355, MIR3976, TMEM200C, L3MBTL4, MIR4317, LOC100130480, ARHGAP28, LINC00668, LAMA1, LRRC30, PTPRM, LOC100192426, …	MAPK4, SS18, DSG2, PTPN2, BCL2, DCC, MBD2, SERPINB5, EPB41L3, PHLPP1, SETBP1, SLC39A6, SMAD2, RBBP8, SMAD4, MALT1, GATA6, ZNF521	hsa-mir-4317, hsa-mir-3156-2, hsa-mir-320c-1, hsa-mir-133a-1, hsa-mir-1-2, hsa-mir-320c-2, hsa-mir-302f, hsa-mir-187, hsa-mir-4318, hsa-mir-924, hsa-mir-4319, hsa-mir-1539, U58C, U58A, U58B, mgU12-22/U4-8, U91, hsa-mir-4320, ACA37, hsa-mir-122	C-7KBTZ	C-6HGFA	chr18:136226-78014123
UPN8	Gain	4	21	q22.3	q11.2	293	33090.9	33620	arr[hg19] 21q11.2q22.3(15,006,457-48,097,372)x4	POTED, C21orf15, ANKRD20A11P, LIPI, RBM11, ABCC13, HSPA13, SAMSN1, SAMSN1-AS1, LOC388813, NRIP1, USP25, LINC00478, MIR99A, MIRLET7C, MIR125B2, C21orf37, CXADR, BTG3, C21orf91-OT1, C21orf91, CHODL-AS1, CHODL, TMPRSS15, LINC00320, NCAM2, RNU6-67P, LINC00317, LINC00308, D21S2088E, LOC339622, LINC00158, MIR155HG, MIR155, LINC00515, MRPL39, JAM2, ATP5J, GABPA, APP, CYYR1, ADAMTS1, ADAMTS5, MIR4759, MI…	TMPRSS3, MIR125B2, U2AF1, ETS2, DYRK1A, OLIG2, NRIP1, ADAMTS1, RUNX1, CSTB, TFF3, TMPRSS2, TFF2, TIAM1, PTTG1IP, S100B, ERG, TFF1	hsa-mir-3118-5, hsa-mir-99a, hsa-let-7c, hsa-mir-125b-2, hsa-mir-548x, hsa-mir-155, hsa-mir-4327, ACA67, hsa-mir-802, hsa-mir-3197	C-6OPRF	C-3ELOA	chr21:15006457-48097372
UPN8	Gain	4	X	q28	p22.33	1020	155016	189766	arr[hg19] Xp22.33q28(217,329-155,233,731)x4	PLCXD1, GTPBP6, LINC00685, PPP2R3B, SHOX, CRLF2, CSF2RA, MIR3690, IL3RA, SLC25A6, ASMTL-AS1, ASMTL, P2RY8, AKAP17A, ASMT, DHRSX, ZBED1, CD99P1, LINC00102, CD99, XG, XGPY2, GYG2, ARSD, ARSE, ARSH, ARSF, CXorf28, MXRA5, PRKX, LOC389906, NLGN4X, MIR4770, VCX3A, HDHD1, MIR4767, STS, VCX, PNPLA4, MIR651, VCX2, VCX3B, KAL1, FAM9A, FAM9B, TBL1X, GPR143, SHROOM2, LOC100288814, WWC3, CLCN4, MID1, HCCS, AR…	SEPT6, ARMCX3, AIFM1, CRLF2, AR, STAG2, FOXP3, P2RY8, ARMCX1, CXCR3, DKC1, FAM123B, IL3RA, TFE3, ARMCX2, Sep.06, BRWD3, SPANXA1, MIR222, AMOT, RPL10, FOXO4, BCOR, MIR221, MTCP1, REPS2, PHF6, SSX2, RBBP7, KDM6A, ZBTB33, NONO, BTK, ZRSR2, GPC3, L1CAM, GATA1, DACH2, ELF4, MSN, RHOXF2	hsa-mir-651, hsa-mir-1308, ACA12, hsa-mir-548f-5, hsa-mir-221, hsa-mir-222, SNORA11C, hsa-mir-532, hsa-mir-188, hsa-mir-500, hsa-mir-362, hsa-mir-501, hsa-mir-500b, hsa-mir-660, hsa-mir-502, SNORA11E, SNORA11D, hsa-mir-98, hsa-let-7f-2, U107, hsa-mir-1468, hsa-mir-223, hsa-mir-421, hsa-mir-374b, hsa-mir-545, hsa-mir-374a, hsa-mir-384, hsa-mir-325, hsa-mir-4328, hsa-mir-548i-4, hsa-mir-1321, hsa-m…	C-6VTUE	C-6KTXX	chrX:217329-155233731
UPN8	Loss	0	1	p13.1	p13.1	1	43.544	36	arr[hg19] 1p13.1(117,042,066-117,085,610)x0	CD58			C-3SYKI	S-3HGNC	chr1:117042066-117085610
UPN8	Loss	1	15	q15.1	q15.1	2	75.794	60	arr[hg19] 15q15.1(41,915,521-41,991,315)x1	MGA, MIR626	hsa-mir-626	hsa-mir-626	S-4KLPX	S-3ZGFM	chr15:41915521-41991315
UPN9	Gain	3	6	q27	p25.3	1220	170763	155053	arr[hg19] 6p25.3q27(156,974-170,919,482)x3	DUSP22, IRF4, EXOC2, HUS1B, LOC285768, FOXQ1, FOXF2, FOXC1, GMDS, LOC100508120, C6orf195, MYLK4, WRNIP1, SERPINB1, MIR4645, MGC39372, SERPINB9, SERPINB6, DKFZP686I15217, NQO2, HTATSF1P2, RIPK1, BPHL, TUBB2A, LOC100507194, TUBB2B, PSMG4, SLC22A23, PXDC1, FAM50B, PRPF4B, FAM217A, C6orf201, ECI2, CDYL, RPP40, PPP1R3G, LYRM4, MIR3691, FARS2, NRN1, F13A1, LY86-AS1, LY86, RREB1, SSR1, CAGE1, RIOK1, DSP…	HIST1H4F, PPARD, TFAP2A, IRF4, IGF2R, CD109, LIN28B, EPHA7, CEP85L, DDX43, HIST1H3F, POLH, hsa-mir-548a-2, ID4, ZFAND3, HMGA1, CDKN1A, HFE, EEF1A1, BACH2, JARID2, CTGF, MLLT4, DAXX, BAK1, AGER, CCNC, THBS2, MYB, CASP8AP2 , CITED2, DEK, CAGE1, RUNX2, NFKBIE, SESN1, MAPK13, FOXO3, RNASET2, FGFR1OP, TFEB, WISP3, IER3, LATS1, TNF, AHI1, HIST1H4G, ARMC2, CCND3, MAP3K7, SOX4, HDAC2, E2F3, PLAGL1, ECT2L…	hsa-mir-548a-1, hsa-mir-3143, U32B, hsa-mir-877, U83, U84, ACA38, U48, U52, hsa-mir-1236, hsa-mir-219-1, hsa-mir-1275, hsa-mir-586, hsa-mir-206, hsa-mir-133b, hsa-mir-548u, hsa-mir-30c-2, hsa-mir-30a, hsa-mir-4282, U50, U50B, hsa-mir-2113, hsa-mir-587, hsa-mir-548b, hsa-mir-3144, hsa-mir-588, U101, HBII-429, ACA33, hsa-mir-548a-2, hsa-mir-3145, hsa-mir-1273c, hsa-mir-1202, ACA20, ACA29, hsa-mir-1…	C-3GOBV	C-5ELRJ	chr6:156974-170919482
UPN9	Gain	3	10	q26.3	p15.3	921	135285	133193	arr[hg19] 10p15.3q26.3(142,391-135,427,143)x3	ZMYND11, DIP2C, MIR5699, PRR26, LARP4B, GTPBP4, IDI2, IDI2-AS1, IDI1, WDR37, LINC00200, ADARB2, ADARB2-AS1, LINC00700, LINC00701, PFKP, PITRM1, PITRM1-AS1, KLF6, LINC00704, LINC00705, AKR1E2, AKR1C6P, AKR1C1, AKR1C2, AKR1C3, AKR1CL1, AKR1C4, UCN3, TUBAL3, NET1, CALML5, CALML3, ASB13, FAM208B, GDI2, ANKRD16, FBXO18, IL15RA, IL2RA, RBM17, PFKFB3, MIR3155A, MIR3155B, LOC399715, PRKCQ, PRKCQ-AS1, LIN…	LOXL4, EIF3A, PDCD4, SIRT1, RET, ZMIZ1, ADD3, AKR1C3, LGI1, MLLT10, FGF8, MRC1, PAX2, BAG3, DMBT1, BNIP3, BLNK, PTEN, RHOBTB1, KAT6B, TLX1, AIFM2, PSAP, LDB1, MAPK8, NT5C2, NET1, ARID5B, ERCC6, HTRA1, BMI1, NCOA4, TET1, CCDC6, MXI1, DKK1, KLF6, ABI1, SNCG, BTRC, NFKB2, GATA3, ALOX5, FGFR2, ADAM12	hsa-mir-3155, hsa-mir-548q, hsa-mir-4293, hsa-mir-1265, hsa-mir-511-1, hsa-mir-511-2, hsa-mir-1915, hsa-mir-603, hsa-mir-604, hsa-mir-938, hsa-mir-3156-1, hsa-mir-4294, hsa-mir-605, hsa-mir-548f-1, hsa-mir-1296, HBII-419, hsa-mir-1254, hsa-mir-606, hsa-mir-346, hsa-mir-107, hsa-mir-3157, hsa-mir-607, hsa-mir-1287, U108, hsa-mir-608, hsa-mir-3158-1, hsa-mir-3158-2, hsa-mir-146b, hsa-mir-1307, hsa-…	C-6UPKW	C-5DPFD	chr10:142391-135427143
UPN9	Gain	3	14	q32.33	q11.2	770	86773.8	85690	arr[hg19] 14q11.2q32.33(20,511,672-107,285,437)x3	OR4L1, OR4K17, OR4N5, OR11G2, OR11H6, OR11H4, TTC5, CCNB1IP1, SNORD126, RPPH1, PARP2, TEP1, KLHL33, OSGEP, APEX1, TMEM55B, PNP, RNASE10, RNASE9, RNASE11, RNASE12, OR6S1, ANG, RNASE4, EDDM3A, EDDM3B, RNASE6, RNASE1, RNASE3, ECRP, RNASE2, METTL17, SLC39A2, NDRG2, TPPP2, RNASE13, RNASE7, RNASE8, ARHGEF40, ZNF219, TMEM253, OR5AU1, LINC00641, HNRNPC, RPGRIP1, SUPT16H, CHD8, SNORD9, SNORD8, RAB2B, TOX4…	TRIP11, NKX2-1, TCL6, VRK1, MTA1, PRKD1, SAV1, JAG2, ESR2, BCL11B, GPHN, AKT1, DPF3, NUMB, TSHR, PAX9, DIO2, EML1, IGH@, TRD@, TCL1B, ANG, MMP14, XRCC3, ZFP36L1, TCL1A, TRA@, PTPN21, NDRG2, FUT8, TRA, SEL1L, GPR68, MEG3, OTX2, LGALS3, NIN, FOXA1, TRD, SIX1, TRAF3, STRN3, IGH	hsa-mir-1201, SNORD126, mgU6-53B, mgU6-53, hsa-mir-208a, hsa-mir-208b, hsa-mir-4307, hsa-mir-3171, hsa-mir-624, hsa-mir-3172, SNORD127, hsa-mir-4308, hsa-mir-548h-1, hsa-mir-625, hsa-mir-1260, ACA65, SNORA11B, hsa-mir-3173, U93, hsa-mir-342, hsa-mir-345, hsa-mir-770, hsa-mir-493, hsa-mir-337, hsa-mir-665, hsa-mir-431, hsa-mir-433, hsa-mir-127, hsa-mir-432, hsa-mir-136, 14q(0), hsa-mir-370, 14q(I-…	S-4ETOO	S-3HXYB	chr14:20511672-107285437
UPN9	Gain	3	17	q25.3	p13.3	1373	81041.4	73347	arr[hg19] 17p13.3q25.3(525-81,041,938)x3	DOC2B, RPH3AL, LOC100506388, C17orf97, FAM101B, VPS53, FAM57A, GEMIN4, DBIL5P, GLOD4, RNMTL1, NXN, TIMM22, ABR, MIR3183, BHLHA9, TUSC5, YWHAE, CRK, MYO1C, INPP5K, PITPNA-AS1, PITPNA, SLC43A2, SCARF1, RILP, PRPF8, TLCD2, MIR22HG, MIR22, WDR81, SERPINF2, SERPINF1, SMYD4, RPA1, RTN4RL1, DPH1, OVCA2, MIR132, MIR212, HIC1, SMG6, SRR, TSR1, SNORD91B, SNORD91A, SGSM2, MNT, LOC284009, METTL16, PAFAH1B1, …	IKZF3, FAM57A, NCOR1, MAPK7, MLLT6, GAST, SHBG, SLC9A3R1, SLC4A1, PER1, STAT5B, SEPT9, AXIN2, COL1A1, KDM6B, BRCA1, ENPP7, RABEP1, ETV4, DDX5, TRAF4, GRN, MYBBP1A, KSR1, LASP1, SPECC1, IGF2BP1, TBX2, TIMP2, CDC6, HIC1, CLDN7, ELAC2, SLC16A3, CRLF3, BCAS3, RNF213, TAF15, USP6, ALOX15, RPL26, CASC3, FLCN, PRKAR1A, NF1, GRB2, ASPSCR1, SUZ12, MIR21, RAC3, PYY, GAS7, DLX4, SRSF2, XAF1, PPP1R1B, ALOX12…	hsa-mir-3183, hsa-mir-22, hsa-mir-132, hsa-mir-212, HBII-296B, HBII-296A, hsa-mir-1253, hsa-mir-195, hsa-mir-497, hsa-mir-324, ACA48, mgU6-77, U67, ACA68, hsa-mir-4314, U8, hsa-mir-744, hsa-mir-548h-3, hsa-mir-1288, U49B, U49A, HBII-135, hsa-mir-33b, U3-2, U3-2B, U3-4, U3, U3-3, hsa-mir-1180, ACA59B, U42B, mgh18S-121, U42A, Z17B, hsa-mir-451, hsa-mir-144, hsa-mir-423, hsa-mir-3184, hsa-mir-193a, …	C-5VAZU	S-4LRWR	chr17:525-81041938
UPN9	Gain	4	18	q23	p11.32	342	77877.9	66936	arr[hg19] 18p11.32q23(136,226-78,014,123)x4	USP14, THOC1, COLEC12, CETN1, CLUL1, C18orf56, TYMS, ENOSF1, YES1, ADCYAP1, LINC00470, METTL4, NDC80, CBX3P2, SMCHD1, EMILIN2, LPIN2, LOC727896, MYOM1, MYL12A, MYL12B, TGIF1, DLGAP1, DLGAP1-AS1, DLGAP1-AS3, DLGAP1-AS4, DLGAP1-AS5, C18orf42, LINC00526, LINC00667, ZBTB14, EPB41L3, LOC645355, MIR3976, TMEM200C, L3MBTL4, MIR4317, LOC100130480, ARHGAP28, LINC00668, LAMA1, LRRC30, PTPRM, LOC100192426, …	GATA6, SETBP1, DSG2, PHLPP1, SERPINB5, DCC, BCL2, SMAD2, MAPK4, SMAD4, MBD2, PTPN2, SLC39A6, ZNF521, SS18, EPB41L3, RBBP8, MALT1	hsa-mir-4317, hsa-mir-3156-2, hsa-mir-320c-1, hsa-mir-133a-1, hsa-mir-1-2, hsa-mir-320c-2, hsa-mir-302f, hsa-mir-187, hsa-mir-4318, hsa-mir-924, hsa-mir-4319, hsa-mir-1539, U58C, U58A, U58B, mgU12-22/U4-8, U91, hsa-mir-4320, ACA37, hsa-mir-122	C-7KBTZ	C-6HGFA	chr18:136226-78014123
UPN9	Gain	3	20	p12.3	p13	18	1592.33	1508	arr[hg19] 20p13p12.3(4,386,519-5,978,847)x3	PRNP, PRND, PRNT, RASSF2, SLC23A2, TMEM230, PCNA, PCNA-AS1, CDS2, PROKR2, LINC00658, LOC643406, LINC00654, GPCPD1, C20orf196, CHGB, TRMT6, MCM8	RASSF2		S-3MFAM	C-4LLPP	chr20:4386519-5978847
UPN9	Loss	1	20	p12.1	p12.2	5	2059.05	1697	arr[hg19] 20p12.2p12.1(11,623,679-13,682,729)x1	BTBD3, SPTLC3, ISM1, ISM1-AS1, TASP1			S-4SKBO	C-5ZQQR	chr20:11623679-13682729
UPN9	Gain	3	20	p12.1	p12.1	1	66.825	84	arr[hg19] 20p12.1(16,397,677-16,464,502)x3	KIF16B			C-4SQPO	C-3QQVS	chr20:16397677-16464502
UPN9	Gain	3	20	p11.23	p12.1	4	218.542	204	arr[hg19] 20p12.1p11.23(17,839,058-18,057,600)x3	SNX5, SNORD17, MGME1, OVOL2		HBI-43	C-6GOAB	C-6HVZD	chr20:17839058-18057600
UPN9	Gain	3	20	p11.23	p11.23	4	988.551	891	arr[hg19] 20p11.23(18,787,135-19,775,686)x3	C20orf78, SCP2D1, SLC24A3, LOC100130264			C-5CGSL	S-4IBGD	chr20:18787135-19775686
UPN9	Gain	3	20	p11.21	p11.23	9	1727.24	1308	arr[hg19] 20p11.23p11.21(21,206,171-22,933,409)x3	PLK1S1, XRN2, NKX2-4, NKX2-2, PAX1, LOC100270679, LOC284788, LINC00261, FOXA2	NKX2-2		C-3LTTT	C-7QPWL	chr20:21206171-22933409
UPN9	Loss	1	20	q11.21	q11.21	38	1626	1619	arr[hg19] 20q11.21(29,833,534-31,459,535)x1	DEFB115, DEFB116, DEFB118, DEFB119, DEFB121, DEFB122, DEFB123, DEFB124, REM1, LINC00028, HM13, PSIMCT-1, HM13-AS1, ID1, MIR3193, COX4I2, BCL2L1, TPX2, MYLK2, FOXS1, DUSP15, TTLL9, PDRG1, XKR7, CCM2L, HCK, TM9SF4, TSPY26P, PLAGL2, POFUT1, KIF3B, ASXL1, C20orf112, LOC149950, C20orf203, COMMD7, DNMT3B, MAPRE1	ASXL1, NOL4L (C20orf112), MAPRE1, BCL2L1, PLAGL2	hsa-mir-3193, hsa-mir-1825	S-4DZPP	S-3GUGK	chr20:29833534-31459535
UPN9	Loss	1	20	q11.22	q11.22	38	1989.56	1736	arr[hg19] 20q11.22(32,128,025-34,117,587)x1	CBFA2T2, NECAB3, C20orf144, ACTL10, E2F1, PXMP4, ZNF341, CHMP4B, RALY, MIR4755, EIF2S2, ASIP, AHCY, ITCH, MIR644A, DYNLRB1, MAP1LC3A, PIGU, TP53INP2, NCOA6, HMGB3P1, GGT7, ACSS2, GSS, MYH7B, MIR499A, MIR499B, TRPC4AP, EDEM2, PROCR, MMP24, MMP24-AS1, EIF6, FAM83C, UQCC, GDF5, CEP250, C20orf173	E2F1, CBFA2T2	hsa-mir-644, hsa-mir-499, hsa-mir-1289-1	C-4EKHS	C-6WXVB	chr20:32128025-34117587
UPN9	Gain	3	20	q12	q12	7	1248.2	1099	arr[hg19] 20q12(39,295,353-40,543,557)x3	MAFB, TOP1, PLCG1, ZHX3, LPIN3, EMILIN3, CHD6	MAFB, TOP1		C-5UYKJ	C-6LPHK	chr20:39295353-40543557
UPN9	Gain	3	20	q12	q12	1	60.707	64	arr[hg19] 20q12(41,018,090-41,078,797)x3	PTPRT			C-4MJGC	C-6OXLQ	chr20:41018090-41078797
UPN9	Gain	3	20	q13.11	q12	1	237.143	271	arr[hg19] 20q12q13.11(41,560,211-41,797,354)x3	PTPRT			C-3OUKK	C-3LIHP	chr20:41560211-41797354
UPN9	Loss	1	20	q13.12	q13.12	27	620.77	604	arr[hg19] 20q13.12(44,172,332-44,793,102)x1	EPPIN-WFDC6, EPPIN, WFDC8, WFDC9, WFDC10A, WFDC11, WFDC10B, WFDC13, SPINT4, WFDC3, DNTTIP1, UBE2C, TNNC2, SNX21, ACOT8, ZSWIM3, ZSWIM1, SPATA25, NEURL2, CTSA, PLTP, PCIF1, ZNF335, MMP9, SLC12A5, NCOA5, CD40	MMP9, UBE2C		C-6MSZM	C-3ERNG	chr20:44172332-44793102
UPN9	Gain	3	20	q13.31	q13.31	1	147.44	122	arr[hg19] 20q13.31(55,115,833-55,263,273)x3	TFAP2C			S-4QHFG	S-3MUUP	chr20:55115833-55263273
UPN9	Loss	1	20	q13.32	q13.32	10	333.264	353	arr[hg19] 20q13.32(57,295,128-57,628,392)x1	MIR296, MIR298, GNAS-AS1, GNAS, NELFCD, CTSZ, TUBB1, ATP5E, SLMO2-ATP5E, SLMO2		hsa-mir-296, hsa-mir-298	S-4KFTD	C-5QNUZ	chr20:57295128-57628392
UPN9	Gain	3	20	q13.33	q13.33	2	145.05	261	arr[hg19] 20q13.33(62,770,505-62,915,555)x3	MYT1, PCMTD2			C-4CEME	C-4JBSQ	chr20:62770505-62915555
UPN9	Gain	4.5	21	q22.3	q11.2	293	33090.9	33620	arr[hg19] 21q11.2q22.3(15,006,457-48,097,372)x4-5	POTED, C21orf15, ANKRD20A11P, LIPI, RBM11, ABCC13, HSPA13, SAMSN1, SAMSN1-AS1, LOC388813, NRIP1, USP25, LINC00478, MIR99A, MIRLET7C, MIR125B2, C21orf37, CXADR, BTG3, C21orf91-OT1, C21orf91, CHODL-AS1, CHODL, TMPRSS15, LINC00320, NCAM2, RNU6-67P, LINC00317, LINC00308, D21S2088E, LOC339622, LINC00158, MIR155HG, MIR155, LINC00515, MRPL39, JAM2, ATP5J, GABPA, APP, CYYR1, ADAMTS1, ADAMTS5, MIR4759, MI…	PTTG1IP, MIR125B2, OLIG2, TFF1, ETS2, S100B, CSTB, RUNX1, U2AF1, TFF3, NRIP1, DYRK1A, TMPRSS3, TMPRSS2, ERG, TFF2, TIAM1, ADAMTS1	hsa-mir-3118-5, hsa-mir-99a, hsa-let-7c, hsa-mir-125b-2, hsa-mir-548x, hsa-mir-155, hsa-mir-4327, ACA67, hsa-mir-802, hsa-mir-3197	C-6OPRF	C-3ELOA	chr21:15006457-48097372
UPN9	Gain	4	X	p22.33	p22.33	22	2535.34	4108	arr[hg19] Xp22.33(168,546-2,703,884)x4	PLCXD1, GTPBP6, LINC00685, PPP2R3B, SHOX, CRLF2, CSF2RA, MIR3690, IL3RA, SLC25A6, ASMTL-AS1, ASMTL, P2RY8, AKAP17A, ASMT, DHRSX, ZBED1, CD99P1, LINC00102, CD99, XG, XGPY2	IL3RA, P2RY8, CRLF2		C-5QGHR	C-5JNND	chrX:168546-2703884
UPN9	Gain	2	X	q28	p22.33	996	152226	185188	arr[hg19] Xp22.33q28(2,703,941-154,930,047)x2	XG, GYG2, ARSD, ARSE, ARSH, ARSF, CXorf28, MXRA5, PRKX, LOC389906, NLGN4X, MIR4770, VCX3A, HDHD1, MIR4767, STS, VCX, PNPLA4, MIR651, VCX2, VCX3B, KAL1, FAM9A, FAM9B, TBL1X, GPR143, SHROOM2, LOC100288814, WWC3, CLCN4, MID1, HCCS, ARHGAP6, AMELX, MSL3, FRMPD4, PRPS2, TLR7, TLR8-AS1, TLR8, TMSB4X, FAM9C, LOC100093698, ATXN3L, LOC100133123, EGFL6, TCEANC, RAB9A, TRAPPC2, OFD1, GPM6B, GEMIN8, GLRA2, F…	ZRSR2, PHF6, SSX2, ARMCX1, ARMCX2, ZBTB33, ARMCX3, REPS2, TFE3, FOXP3, RHOXF2, ELF4, MIR221, BRWD3, SEPT6, FOXO4, BTK, KDM6A, RBBP7, FAM123B, AMOT, DACH2, MTCP1, Sep.06, MIR222, AR, SPANXA1, L1CAM, NONO, AIFM1, GATA1, DKC1, MSN, CXCR3, RPL10, BCOR, GPC3, STAG2	hsa-mir-651, hsa-mir-1308, ACA12, hsa-mir-548f-5, hsa-mir-221, hsa-mir-222, SNORA11C, hsa-mir-532, hsa-mir-188, hsa-mir-500, hsa-mir-362, hsa-mir-501, hsa-mir-500b, hsa-mir-660, hsa-mir-502, SNORA11E, SNORA11D, hsa-mir-98, hsa-let-7f-2, U107, hsa-mir-1468, hsa-mir-223, hsa-mir-421, hsa-mir-374b, hsa-mir-545, hsa-mir-374a, hsa-mir-384, hsa-mir-325, hsa-mir-4328, hsa-mir-548i-4, hsa-mir-1321, hsa-m…	C-5PIAP	C-4WSEY	chrX:2703941-154930047
UPN9	Gain	4	X	q28	q28	3	291.863	522	arr[hg19] Xq28 or Yq12(154,941,868-155,233,731 or 59,044,874-59,336,737)x4	SPRY3, VAMP7, IL9R			C-6RODU	C-6KTXX	chrX:154941868-155233731
UPN9	Gain	2	Y	q11.223	p11.31	74	21370.4	11984	arr[hg19] Yp11.31q11.223(2,650,140-24,020,508)x2	SRY, RPS4Y1, ZFY, LINC00278, TGIF2LY, PCDH11Y, TTTY23, TTTY23B, TSPY2, TTTY1B, TTTY1, TTTY2, TTTY2B, TTTY21, TTTY21B, TTTY7, TTTY7B, TTTY8, TTTY8B, AMELY, TBL1Y, PRKY, TTTY16, TTTY12, TTTY18, TTTY19, TTTY11, RBMY1A3P, TTTY20, FAM197Y2, FAM197Y5, TSPY8, TSPY4, TSPY3, TSPY1, RBMY3AP, TTTY22, GYG2P1, TTTY15, USP9Y, DDX3Y, UTY, TMSB4Y, VCY1B, VCY, NLGN4Y, NLGN4Y-AS1, FAM41AY2, FAM41AY1, FAM224B, FAM2…			C-4NKQB	C-5RCPZ	chrY:2650140-24020508
UPN10	LOH		18	q23	p11.32	342	77878.3	21903	arr[hg19] 18p11.32q23(136,304-78,014,582) hmz	USP14, THOC1, COLEC12, CETN1, CLUL1, C18orf56, TYMS, ENOSF1, YES1, ADCYAP1, LINC00470, METTL4, NDC80, CBX3P2, SMCHD1, EMILIN2, LPIN2, LOC727896, MYOM1, MYL12A, MYL12B, TGIF1, DLGAP1, DLGAP1-AS1, DLGAP1-AS3, DLGAP1-AS4, DLGAP1-AS5, C18orf42, LINC00526, LINC00667, ZBTB14, EPB41L3, LOC645355, MIR3976, TMEM200C, L3MBTL4, MIR4317, LOC100130480, ARHGAP28, LINC00668, LAMA1, LRRC30, PTPRM, LOC100192426, …	SS18, MBD2, MALT1, DSG2, GATA6, PHLPP1, DCC, PTPN2, MAPK4, SMAD4, SLC39A6, BCL2, SETBP1, SMAD2, EPB41L3, RBBP8, SERPINB5, ZNF521	hsa-mir-4317, hsa-mir-3156-2, hsa-mir-320c-1, hsa-mir-133a-1, hsa-mir-1-2, hsa-mir-320c-2, hsa-mir-302f, hsa-mir-187, hsa-mir-4318, hsa-mir-924, hsa-mir-4319, hsa-mir-1539, U58C, U58A, U58B, mgU12-22/U4-8, U91, hsa-mir-4320, ACA37, hsa-mir-122	S-4FCMQ	S-3ZTYO	chr18:136304-78014582
UPN10	LOH		X	q28	p22.33	1007	153951	26865	arr[hg19] Xp22.33q28(169,804-154,121,295) hmz	PLCXD1, GTPBP6, LINC00685, PPP2R3B, SHOX, CRLF2, CSF2RA, MIR3690, IL3RA, SLC25A6, ASMTL-AS1, ASMTL, P2RY8, AKAP17A, ASMT, DHRSX, ZBED1, CD99P1, LINC00102, CD99, XG, XGPY2, GYG2, ARSD, ARSE, ARSH, ARSF, CXorf28, MXRA5, PRKX, LOC389906, NLGN4X, MIR4770, VCX3A, HDHD1, MIR4767, STS, VCX, PNPLA4, MIR651, VCX2, VCX3B, KAL1, FAM9A, FAM9B, TBL1X, GPR143, SHROOM2, LOC100288814, WWC3, CLCN4, MID1, HCCS, AR…	PHF6, RPL10, GATA1, GPC3, DKC1, DACH2, MIR221, L1CAM, STAG2, ARMCX1, IL3RA, CXCR3, SEPT6, FOXP3, FAM123B, NONO, RBBP7, RHOXF2, ZRSR2, ARMCX3, MSN, P2RY8, AIFM1, ARMCX2, KDM6A, ELF4, REPS2, Sep.06, SSX2, BRWD3, ZBTB33, TFE3, MIR222, AR, BTK, AMOT, BCOR, FOXO4, SPANXA1, CRLF2	hsa-mir-651, hsa-mir-1308, ACA12, hsa-mir-548f-5, hsa-mir-221, hsa-mir-222, SNORA11C, hsa-mir-532, hsa-mir-188, hsa-mir-500, hsa-mir-362, hsa-mir-501, hsa-mir-500b, hsa-mir-660, hsa-mir-502, SNORA11E, SNORA11D, hsa-mir-98, hsa-let-7f-2, U107, hsa-mir-1468, hsa-mir-223, hsa-mir-421, hsa-mir-374b, hsa-mir-545, hsa-mir-374a, hsa-mir-384, hsa-mir-325, hsa-mir-4328, hsa-mir-548i-4, hsa-mir-1321, hsa-m…	S-3CTFN	S-3GXOG	chrX:169804-154121295
UPN10	Loss	1	1	q21.3	q21.3	1	15.45	20	arr[hg19] 1q21.3(150,785,696-150,801,146)x1	ARNT	ARNT		C-7EFVI	C-4ZACT	chr1:150785696-150801146
UPN10	Loss	1	5	q22.2	q22.2	1	13.917	24	arr[hg19] 5q22.2(112,101,090-112,115,007)x1	APC	APC		C-6DVGU	C-7INMQ	chr5:112101090-112115007
UPN10	Loss	1	12	q23.2	q23.2	1	20.604	24	arr[hg19] 12q23.2(101,601,466-101,622,070)x1	SLC5A8	SLC5A8		C-7RAOB	C-5WFXV	chr12:101601466-101622070
UPN10	Gain	2.72	6	q27	p25.3	1220	170763	155053	arr[hg19] 6p25.3q27(156,974-170,919,482)x2-3	DUSP22, IRF4, EXOC2, HUS1B, LOC285768, FOXQ1, FOXF2, FOXC1, GMDS, LOC100508120, C6orf195, MYLK4, WRNIP1, SERPINB1, MIR4645, MGC39372, SERPINB9, SERPINB6, DKFZP686I15217, NQO2, HTATSF1P2, RIPK1, BPHL, TUBB2A, LOC100507194, TUBB2B, PSMG4, SLC22A23, PXDC1, FAM50B, PRPF4B, FAM217A, C6orf201, ECI2, CDYL, RPP40, PPP1R3G, LYRM4, MIR3691, FARS2, NRN1, F13A1, LY86-AS1, LY86, RREB1, SSR1, CAGE1, RIOK1, DSP…	CD109, CEP85L, PPARD, CTGF, MLLT4, IGF2R, DAXX, CCND3, AHI1, BCLAF1, FOXO3, SOX4, ID4, LIN28B, CCNC, PLAGL1, FGFR1OP, SESN1, IRF4, TFAP2A, TNFAIP3, IER3, DEK, DDR1, CDKN1A, FANCE, LATS1, PRDM1, THBS2, DDX43, CITED2, BAK1, MYB, JARID2, CASP8AP2 , POLH, HIST1H2BH, WISP3, IL17A, HIST1H3F, HMGA1, EEF1A1, HFE, RUNX2, MAPK13, TFEB, ZFAND3, EPHA7, CAGE1, RNF217-AS1, hsa-mir-548a-2, AKAP12, AGER, MAP3K7,…	hsa-mir-548a-1, hsa-mir-3143, U32B, hsa-mir-877, U83, U84, ACA38, U48, U52, hsa-mir-1236, hsa-mir-219-1, hsa-mir-1275, hsa-mir-586, hsa-mir-206, hsa-mir-133b, hsa-mir-548u, hsa-mir-30c-2, hsa-mir-30a, hsa-mir-4282, U50, U50B, hsa-mir-2113, hsa-mir-587, hsa-mir-548b, hsa-mir-3144, hsa-mir-588, U101, HBII-429, ACA33, hsa-mir-548a-2, hsa-mir-3145, hsa-mir-1273c, hsa-mir-1202, ACA20, ACA29, hsa-mir-1…		C-5ELRJ	chr6:156974-170919482
UPN10	Gain	2.71	10	q26.3	p15.3	921	135327	133229	arr[hg19] 10p15.3q26.3(100,026-135,427,143)x2-3	ZMYND11, DIP2C, MIR5699, PRR26, LARP4B, GTPBP4, IDI2, IDI2-AS1, IDI1, WDR37, LINC00200, ADARB2, ADARB2-AS1, LINC00700, LINC00701, PFKP, PITRM1, PITRM1-AS1, KLF6, LINC00704, LINC00705, AKR1E2, AKR1C6P, AKR1C1, AKR1C2, AKR1C3, AKR1CL1, AKR1C4, UCN3, TUBAL3, NET1, CALML5, CALML3, ASB13, FAM208B, GDI2, ANKRD16, FBXO18, IL15RA, IL2RA, RBM17, PFKFB3, MIR3155A, MIR3155B, LOC399715, PRKCQ, PRKCQ-AS1, LIN…	GATA3, SIRT1, MLLT10, FGFR2, DMBT1, KLF6, BNIP3, NT5C2, LGI1, ZMIZ1, HTRA1, TLX1, ADAM12, AKR1C3, KAT6B, ERCC6, NCOA4, AIFM2, ALOX5, PDCD4, DKK1, FGF8, LDB1, BMI1, PTEN, ARID5B, NET1, BLNK, BTRC, ADD3, LOXL4, SNCG, NFKB2, TET1, EIF3A, BAG3, PSAP, MXI1, PAX2, MRC1, RHOBTB1, MAPK8, CCDC6, ABI1, RET	hsa-mir-3155, hsa-mir-548q, hsa-mir-4293, hsa-mir-1265, hsa-mir-511-1, hsa-mir-511-2, hsa-mir-1915, hsa-mir-603, hsa-mir-604, hsa-mir-938, hsa-mir-3156-1, hsa-mir-4294, hsa-mir-605, hsa-mir-548f-1, hsa-mir-1296, HBII-419, hsa-mir-1254, hsa-mir-606, hsa-mir-346, hsa-mir-107, hsa-mir-3157, hsa-mir-607, hsa-mir-1287, U108, hsa-mir-608, hsa-mir-3158-2, hsa-mir-3158-1, hsa-mir-146b, hsa-mir-1307, hsa-…	C-4CDQJ	C-5DPFD	chr10:100026-135427143
UPN10	Gain	2.62	14	q32.33	q11.2	770	86773.8	85690	arr[hg19] 14q11.2q32.33(20,511,672-107,285,437)x2-3	OR4L1, OR4K17, OR4N5, OR11G2, OR11H6, OR11H4, TTC5, CCNB1IP1, SNORD126, RPPH1, PARP2, TEP1, KLHL33, OSGEP, APEX1, TMEM55B, PNP, RNASE10, RNASE9, RNASE11, RNASE12, OR6S1, ANG, RNASE4, EDDM3A, EDDM3B, RNASE6, RNASE1, RNASE3, ECRP, RNASE2, METTL17, SLC39A2, NDRG2, TPPP2, RNASE13, RNASE7, RNASE8, ARHGEF40, ZNF219, TMEM253, OR5AU1, LINC00641, HNRNPC, RPGRIP1, SUPT16H, CHD8, SNORD9, SNORD8, RAB2B, TOX4…	PAX9, STRN3, NIN, GPHN, PTPN21, MTA1, JAG2, SEL1L, TRA, EML1, NDRG2, SIX1, DPF3, NUMB, VRK1, MMP14, TRAF3, FOXA1, TCL6, PRKD1, NKX2-1, FUT8, IGH@, TRA@, TRD@, TSHR, ANG, XRCC3, ZFP36L1, TCL1B, AKT1, OTX2, TCL1A, DIO2, TRD, GPR68, MEG3, BCL11B, TRIP11, LGALS3, ESR2, SAV1, IGH	hsa-mir-1201, SNORD126, mgU6-53B, mgU6-53, hsa-mir-208a, hsa-mir-208b, hsa-mir-4307, hsa-mir-3171, hsa-mir-624, hsa-mir-3172, SNORD127, hsa-mir-4308, hsa-mir-548h-1, hsa-mir-625, hsa-mir-1260, ACA65, SNORA11B, hsa-mir-3173, U93, hsa-mir-342, hsa-mir-345, hsa-mir-770, hsa-mir-493, hsa-mir-337, hsa-mir-665, hsa-mir-431, hsa-mir-433, hsa-mir-127, hsa-mir-432, hsa-mir-136, 14q(0), hsa-mir-370, 14q(I-…	S-4ETOO	S-3HXYB	chr14:20511672-107285437
UPN10	Gain	3	17	q25.3	p13.3	1373	81041.4	73347	arr[hg19] 17p13.3q25.3(525-81,041,938)x3	DOC2B, RPH3AL, LOC100506388, C17orf97, FAM101B, VPS53, FAM57A, GEMIN4, DBIL5P, GLOD4, RNMTL1, NXN, TIMM22, ABR, MIR3183, BHLHA9, TUSC5, YWHAE, CRK, MYO1C, INPP5K, PITPNA-AS1, PITPNA, SLC43A2, SCARF1, RILP, PRPF8, TLCD2, MIR22HG, MIR22, WDR81, SERPINF2, SERPINF1, SMYD4, RPA1, RTN4RL1, DPH1, OVCA2, MIR132, MIR212, HIC1, SMG6, SRR, TSR1, SNORD91B, SNORD91A, SGSM2, MNT, LOC284009, METTL16, PAFAH1B1, …	ALOX12, MLLT6, HLF, CRLF3, TP53, KSR1, BRCA1, PYY, PPM1D, FAM57A, RABEP1, GSDMA, TAF15, AATF, NF1, BCAS3, SPECC1, PER1, SLC9A3R1, RPL26, USP6, SHBG, PRKAR1A, RNF213, TIMP2, XAF1, IGF2BP1, RAD51D, STARD3, GRB2, HIC1, ELAC2, RAC3, SUZ12P, ERBB2, WRAP53, CASC3, SLC4A1, CLTC, SEPT9, CLDN7, TRIM37, DDX5, AXIN2, SRSF2, ALOX15, MSI2, ASPSCR1, MIR21, GAS7, NCOR1, ETV4, IKZF3, CDC6, KDM6B, RARA, TRPV1, LA…	hsa-mir-3183, hsa-mir-22, hsa-mir-132, hsa-mir-212, HBII-296B, HBII-296A, hsa-mir-1253, hsa-mir-195, hsa-mir-497, hsa-mir-324, ACA48, mgU6-77, U67, ACA68, hsa-mir-4314, U8, hsa-mir-744, hsa-mir-548h-3, hsa-mir-1288, U49B, U49A, HBII-135, hsa-mir-33b, U3-2, U3-2B, U3-4, U3, U3-3, hsa-mir-1180, ACA59B, U42B, mgh18S-121, U42A, Z17B, hsa-mir-451, hsa-mir-144, hsa-mir-423, hsa-mir-3184, hsa-mir-193a, …	C-5VAZU	S-4LRWR	chr17:525-81041938
UPN10	Gain	4	21	q22.3	q11.2	293	33090.9	33620	arr[hg19] 21q11.2q22.3(15,006,457-48,097,372)x4	POTED, C21orf15, ANKRD20A11P, LIPI, RBM11, ABCC13, HSPA13, SAMSN1, SAMSN1-AS1, LOC388813, NRIP1, USP25, LINC00478, MIR99A, MIRLET7C, MIR125B2, C21orf37, CXADR, BTG3, C21orf91-OT1, C21orf91, CHODL-AS1, CHODL, TMPRSS15, LINC00320, NCAM2, RNU6-67P, LINC00317, LINC00308, D21S2088E, LOC339622, LINC00158, MIR155HG, MIR155, LINC00515, MRPL39, JAM2, ATP5J, GABPA, APP, CYYR1, ADAMTS1, ADAMTS5, MIR4759, MI…	U2AF1, PTTG1IP, TIAM1, MIR125B2, OLIG2, CSTB, ADAMTS1, NRIP1, TFF3, TFF2, TMPRSS3, ERG, ETS2, DYRK1A, TFF1, TMPRSS2, RUNX1, S100B	hsa-mir-3118-5, hsa-mir-99a, hsa-let-7c, hsa-mir-125b-2, hsa-mir-548x, hsa-mir-155, hsa-mir-4327, ACA67, hsa-mir-802, hsa-mir-3197	C-6OPRF	C-3ELOA	chr21:15006457-48097372
UPN10	Gain	4	X	q28	p22.33	1020	155065	189818	arr[hg19] Xp22.33q28(168,546-155,233,731)x4	PLCXD1, GTPBP6, LINC00685, PPP2R3B, SHOX, CRLF2, CSF2RA, MIR3690, IL3RA, SLC25A6, ASMTL-AS1, ASMTL, P2RY8, AKAP17A, ASMT, DHRSX, ZBED1, CD99P1, LINC00102, CD99, XG, XGPY2, GYG2, ARSD, ARSE, ARSH, ARSF, CXorf28, MXRA5, PRKX, LOC389906, NLGN4X, MIR4770, VCX3A, HDHD1, MIR4767, STS, VCX, PNPLA4, MIR651, VCX2, VCX3B, KAL1, FAM9A, FAM9B, TBL1X, GPR143, SHROOM2, LOC100288814, WWC3, CLCN4, MID1, HCCS, AR…	PHF6, RPL10, GATA1, GPC3, DKC1, DACH2, MIR221, L1CAM, STAG2, ARMCX1, IL3RA, CXCR3, MTCP1, SEPT6, FOXP3, FAM123B, NONO, RBBP7, RHOXF2, ZRSR2, ARMCX3, MSN, P2RY8, AIFM1, ARMCX2, KDM6A, ELF4, REPS2, Sep.06, SSX2, BRWD3, ZBTB33, TFE3, MIR222, AR, BTK, AMOT, BCOR, FOXO4, SPANXA1, CRLF2	hsa-mir-651, hsa-mir-1308, ACA12, hsa-mir-548f-5, hsa-mir-221, hsa-mir-222, SNORA11C, hsa-mir-532, hsa-mir-188, hsa-mir-500, hsa-mir-362, hsa-mir-501, hsa-mir-500b, hsa-mir-660, hsa-mir-502, SNORA11E, SNORA11D, hsa-mir-98, hsa-let-7f-2, U107, hsa-mir-1468, hsa-mir-223, hsa-mir-421, hsa-mir-374b, hsa-mir-545, hsa-mir-374a, hsa-mir-384, hsa-mir-325, hsa-mir-4328, hsa-mir-548i-4, hsa-mir-1321, hsa-m…	C-5QGHR	C-6KTXX	chrX:168546-155233731
UPN11	LOH		1	p11.2	p36.33	1226	120457	28719	arr[hg19] 1p36.33p11.2(882,802-121,339,317) hmz	NOC2L, KLHL17, PLEKHN1, C1orf170, HES4, ISG15, AGRN, RNF223, C1orf159, LOC254099, MIR200B, MIR200A, MIR429, TTLL10, TNFRSF18, TNFRSF4, SDF4, B3GALT6, FAM132A, UBE2J2, SCNN1D, ACAP3, PUSL1, CPSF3L, GLTPD1, TAS1R3, DVL1, MXRA8, AURKAIP1, CCNL2, LOC148413, MRPL20, ANKRD65, TMEM88B, VWA1, ATAD3C, ATAD3B, ATAD3A, TMEM240, SSU72, C1orf233, MIB2, MMP23B, MMP23A, CDK11B, SLC35E2B, CDK11A, SLC35E2, NADK, …	RPA2, MTHFR, TSPAN1, CD53, MTOR, MIB2, YBX1, SDHB, MIER1, STIL, MUTYH, SFPQ, CSF3R, COL16A1, EPS15, GLMN, CITED4, HIPK1, DVL1, ENO1, CAMTA1, PLA2G2A, RAP1A, JAK1, NRAS, DIRAS3, RHOC, RPL22, CDKN2C, RBM15, GBP1, RPS6KA1, FAM46C, CDC42, SLC16A1, LCK, CDC20, PRDM16, PPP1R8, HNRNPR , PRDM2, REG4, PDZK1IP1, RPL5, LPHN2, RAP1GAP, CDA, BCL2L15, GFI1, MDS2, TAL1, IL22RA1, SEP15 , NOTCH2, WDR77, MPL, VTCN…	hsa-mir-200b, hsa-mir-200a, hsa-mir-429, hsa-mir-4251, hsa-mir-551a, hsa-mir-4252, hsa-mir-34a, hsa-mir-1273d, ACA59, hsa-mir-1290, hsa-mir-1256, hsa-mir-4253, hsa-mir-3115, hsa-mir-1976, ACA35, U17a, U17b, HBII-420, ACA61, ACA44, ACA16, U103, U103B, HBII-251, hsa-mir-4254, hsa-mir-552, hsa-mir-4255, ACA55, hsa-mir-30e, hsa-mir-30c-1, U55, U46, U38A, U38B, hsa-mir-761, hsa-mir-3116-1, hsa-mir-311…	S-3WRNV	S-3VEVX	chr1:882802-121339317
UPN11	LOH		1	q44	q21.1	1132	105165	27763	arr[hg19] 1q21.1q44(144,033,938-249,198,692) hmz	LOC100288142, LINC00623, LOC728875, PPIAL4B, PPIAL4C, PPIAL4A, PFN1P2, NBPF8, NBPF9, LOC653513, PDE4DIP, SEC22B, NOTCH2NL, NBPF10, HFE2, TXNIP, POLR3GL, ANKRD34A, LIX1L, RBM8A, GNRHR2, PEX11B, ITGA10, ANKRD35, PIAS3, NUDT17, POLR3C, RNF115, CD160, PDZK1, GPR89A, GPR89C, PDZK1P1, NBPF24, NBPF11, HYDIN2, NBPF12, LOC728989, NBPF13P, PRKAB2, PDIA3P, FMO5, CHD1L, LINC00624, BCL9, ACP6, GJA5, GJA8, GPR…	CREG1, FCGR2B, EGLN1, MAPKAPK2, RCSD1, ADIPOR1, PTPRC, CRTC2, SHC1, PRCC, CKS1B, ATF3, S100A10, BCL9, PIAS3, KCNH1, CENPF, GAS5, ABL2, IGSF8, SMYD3, MEF2D, SMYD2, PLA2G4A, S100A1, RPS27, PBX1, TNFSF18, PVRL4, PRRX1, TP53BP2, CDC73, DUSP10, RGS2, PTPN7, S100A4, ASPM, S100A13, DHX9, TPM3, ARHGEF2, S100A9, MIXL1, TPR, ENAH, PTGS2, USF1, MLLT11, GLRX2, ESRRG, SDHC, AKT3, PSEN2, ARNT, S100A8, PDE4DIP,…	hsa-mir-4257, hsa-mir-554, hsa-mir-190b, hsa-mir-4258, hsa-mir-92b, hsa-mir-555, ACA42, ACA26, hsa-mir-9-1, hsa-mir-765, hsa-mir-4259, hsa-mir-556, hsa-mir-921, hsa-mir-1255b-2, hsa-mir-557, hsa-mir-3119-1, hsa-mir-3119-2, hsa-mir-1295, hsa-mir-214, hsa-mir-3120, hsa-mir-199a-2, U81, U47, U80, U79, U78, U44, U77, U76, U75, U74, HBI-100, hsa-mir-488, hsa-mir-3121, hsa-mir-1278, hsa-mir-181b-1, hsa…	S-4GXRU	S-3ZWLD	chr1:144033938-249198692
UPN11	LOH		7	p11.1	p22.3	380	57975.8	19981	arr[hg19] 7p22.3p11.1(44,166-58,019,983) hmz	FAM20C, LOC100288524, LOC442497, PDGFA, FLJ44511, PRKAR1B, HEATR2, SUN1, GET4, ADAP1, COX19, CYP2W1, C7orf50, MIR339, GPR146, GPER, ZFAND2A, UNCX, MICALL2, INTS1, MAFK, TMEM184A, PSMG3, PSMG3-AS1, TFAMP1, ELFN1, MAD1L1, MIR4655, FTSJ2, NUDT1, SNX8, EIF3B, CHST12, LFNG, MIR4648, BRAT1, IQCE, TTYH3, AMZ1, GNA12, CARD11, SDK1, FOXK1, AP5Z1, MIR4656, RADIL, PAPOLB, MMD2, RNF216P1, RBAK, RBAK-RBAKDN, …	HOXA13, NPY, IL6, GPER, TWIST1, DDC, HOXA11, GRB10, TRG@, FSCN1, POU6F2, HUS1, GPNMB, ANLN, JAZF1, THSD7A, IKZF1, CYP2W1, SFRP4, ABCB5, HOXA9, ACTB	hsa-mir-339, hsa-mir-589, hsa-mir-1302-6, hsa-mir-3146, hsa-mir-1183, HBII-336, hsa-mir-148a, hsa-mir-196b, hsa-mir-550-1, hsa-mir-550-2, hsa-mir-548n, hsa-mir-1200, ACA9, ACA5, ACA5c, ACA5b, ACA15, hsa-mir-4283-1, hsa-mir-3147	S-3YCTM	S-4IKUK	chr7:44166-58019983
UPN11	LOH		7	q36.3	q11.21	762	96657.5	26432	arr[hg19] 7q11.21q36.3(62,461,703-159,119,220) hmz	ZNF733P, LOC100287834, LOC100287704, MIR4283-1, MIR4283-2, LOC100506050, ZNF727, ZNF735, ZNF679, ZNF736, LOC649395, ZNF680, LOC100128885, LOC641746, ZNF107, ZNF138, ZNF273, ZNF117, ERV3-1, CCT6P3, ZNF92, LOC441242, INTS4L2, CCT6P1, SNORA22, VKORC1L1, GUSB, ASL, CRCP, TPST1, LINC00174, LOC493754, KCTD7, RABGEF1, GTF2IRD1P1, TMEM248, SBDS, TYW1, MIR4650-1, MIR4650-2, PMS2P4, STAG3L4, AUTS2, WBSCR17…	POT1, NRCAM, PEX1, HSPB1, DMTF1, AKAP9, CLDN4, CREB3L2, BCL7B, MUC17, SHH, TTC26, HBP1, TRPV6, EPHA1, HGF, POM121, CAV1, ASNS, ABCB1, SPAM1, RELN, ERVW-1, TRB, STEAP2, LIMK1, EZH2, GATAD1, MET, HIP1, MNX1, STEAP1, BRAF, TAC1, TRB@, AUTS2, COL1A2, EZH2, NRF1, PEG10, POM121C, TRIM24, ZC3HAV1, EZH2, ELN, HIPK2, CDK6, EZH2	hsa-mir-4283-2, ACA22, hsa-mir-4284, hsa-mir-590, ACA14a, hsa-mir-1285-1, hsa-mir-653, hsa-mir-489, hsa-mir-591, hsa-mir-25, hsa-mir-93, hsa-mir-106b, hsa-mir-4285, hsa-mir-548o, hsa-mir-592, hsa-mir-593, hsa-mir-129-1, hsa-mir-182, hsa-mir-96, hsa-mir-183, hsa-mir-335, hsa-mir-29a, hsa-mir-29b-1, hsa-mir-490, hsa-mir-548f-4, hsa-mir-1975, hsa-mir-671, hsa-mir-153-2, hsa-mir-595	S-4HBHG	S-4TJRY	chr7:62461703-159119220
UPN11	LOH		12	q14.3	q13.13	175	11742.2	2537	arr[hg19] 12q13.13q14.3(54,190,591-65,932,766) hmz	HOXC-AS5, HOXC13, HOXC12, HOTAIR, HOXC11, HOXC10, MIR196A2, HOXC9, HOXC8, HOXC6, HOXC5, HOXC4, MIR615, FLJ12825, LOC100240735, LOC100240734, LOC400043, SMUG1, CBX5, MIR3198-2, HNRNPA1, HNRNPA1P10, NFE2, COPZ1, MIR148B, GPR84, ZNF385A, ITGA5, GTSF1, NCKAP1L, PDE1B, PPP1R1A, GLYCAM1, LACRT, DCD, MUCL1, TESPA1, NEUROD4, OR9K2, OR10A7, OR6C74, OR6C6, OR6C1, OR6C3, OR6C75, OR6C65, OR6C76, OR6C2, OR6C7…	DDIT3, USP15, HNRNPA1 , GLI1, AGAP2, SMARCC2, IL23A, HOXC13, CDK4, PA2G4, HOXC11, SARNP	hsa-mir-196a-2, hsa-mir-615, hsa-mir-148b, U59B, U59A, hsa-mir-1228, hsa-mir-616, hsa-mir-26a-2, hsa-let-7i, hsa-mir-548c	S-4PWUR	S-3TAWR	chr12:54190591-65932766
UPN11	LOH		12	q23.3	q23.2	25	3588.38	1091	arr[hg19] 12q23.2q23.3(102,657,972-106,246,348) hmz	IGF1, LINC00485, PAH, ASCL1, C12orf42, STAB2, NT5DC3, GNN, HSP90B1, MIR3652, C12orf73, TDG, GLT8D2, HCFC2, NFYB, TXNRD1, EID3, CHST11, MIR3922, SLC41A2, C12orf45, ALDH1L2, KIAA1033, APPL2, C12orf75	ASCL1		S-4FBNM	S-3GXFK	chr12:102657972-106246348
UPN11	LOH		16	q12.2	q12.1	11	3087.35	896	arr[hg19] 16q12.1q12.2(51,013,567-54,100,914) hmz	SALL1, C16orf97, LINC00919, TOX3, LINC00918, CHD9, LOC643802, RBL2, AKTIP, RPGRIP1L, FTO	RBL2		S-4MPGC	S-4ETMP	chr16:51013567-54100914
UPN11	LOH		X	q28	q27.3	154	9304.89	1753	arr[hg19] Xq27.3q28(145,928,958-155,233,846) hmz	MIR506, MIR507, MIR508, MIR514B, MIR509-1, MIR509-2, MIR509-3, MIR510, MIR514A1, MIR514A3, MIR514A2, FMR1-AS1, FMR1, FMR1NB, AFF2, IDS, LINC00893, CXorf40A, MAGEA9, MAGEA9B, HSFX2, HSFX1, TMEM185A, MAGEA11, MAGEA8-AS1, MAGEA8, CXorf40B, LINC00894, MIR2114, MAMLD1, MTM1, MTMR1, CD99L2, HMGB3, MIR4330, GPR50, VMA21, PASD1, PRRG3, FATE1, CNGA2, MAGEA4, GABRE, MIR452, MAGEA5, MAGEA10-MAGEA5, MAGEA10,…	RPL10, DKC1, L1CAM, MTCP1	hsa-mir-513c, hsa-mir-513b, hsa-mir-513a-1, hsa-mir-513a-2, hsa-mir-506, hsa-mir-507, hsa-mir-508, hsa-mir-514b, hsa-mir-509-2, hsa-mir-509-3, hsa-mir-509-1, hsa-mir-510, hsa-mir-514-1, hsa-mir-514-2, hsa-mir-514-3, hsa-mir-2114, hsa-mir-4330, hsa-mir-224, hsa-mir-452, hsa-mir-105-1, hsa-mir-767, hsa-mir-105-2, hsa-mir-3202-1, hsa-mir-3202-2, hsa-mir-718, U70, ACA36, ACA56, hsa-mir-1184-1, hsa-mi…	S-3MCEF	S-3PQTJ	chrX:145928958-155233846
UPN11	Gain	2.82	1	q44	q21.2	1096	101959	102258	arr[hg19] 1q21.2q44(147,265,853-249,224,684)x2-3	GJA8, GPR89B, GPR89C, PDZK1P1, NBPF24, NBPF11, NBPF8, MIR5087, FLJ39739, PPIAL4B, PPIAL4A, PPIAL4D, PPIAL4F, NBPF14, NBPF9, NBPF15, NBPF16, PPIAL4E, LOC645166, LOC388692, FCGR1C, PPIAL4C, LINC00869, LINC00623, HIST2H2BF, FCGR1A, HIST2H3D, HIST2H4A, HIST2H4B, HIST2H3C, HIST2H3A, HIST2H2AA4, HIST2H2AA3, HIST2H2BC, HIST2H2BE, HIST2H2AC, HIST2H2AB, BOLA1, SV2A, SF3B4, MTMR11, OTUD7B, VPS45, PLEKHO1, …	CREG1, FCGR2B, EGLN1, MAPKAPK2, RCSD1, ADIPOR1, PTPRC, CRTC2, SHC1, PRCC, CKS1B, ATF3, S100A10, KCNH1, CENPF, GAS5, ABL2, IGSF8, SMYD3, MEF2D, SMYD2, PLA2G4A, S100A1, RPS27, PBX1, TNFSF18, PVRL4, PRRX1, TP53BP2, CDC73, DUSP10, RGS2, PTPN7, S100A4, ASPM, S100A13, DHX9, TPM3, ARHGEF2, S100A9, MIXL1, TPR, ENAH, PTGS2, USF1, MLLT11, GLRX2, ESRRG, SDHC, AKT3, PSEN2, ARNT, S100A8, ECM1, TNN, B3GALT2, S…	hsa-mir-4257, hsa-mir-554, hsa-mir-190b, hsa-mir-4258, hsa-mir-92b, hsa-mir-555, ACA42, ACA26, hsa-mir-9-1, hsa-mir-765, hsa-mir-4259, hsa-mir-556, hsa-mir-921, hsa-mir-1255b-2, hsa-mir-557, hsa-mir-3119-1, hsa-mir-3119-2, hsa-mir-1295, hsa-mir-214, hsa-mir-3120, hsa-mir-199a-2, U81, U47, U80, U79, U78, U44, U77, U76, U75, U74, HBI-100, hsa-mir-488, hsa-mir-3121, hsa-mir-1278, hsa-mir-181b-1, hsa…	C-7JDUZ	C-4YYLK	chr1:147265853-249224684
UPN11	Gain	3	4	q35.2	p16.3	891	190889	153163	arr[hg19] 4p16.3q35.2(68,345-190,957,473)x3	ZNF595, ZNF718, ZNF876P, ZNF732, ZNF141, ABCA11P, ZNF721, PIGG, PDE6B, ATP5I, MYL5, MFSD7, PCGF3, LOC100129917, CPLX1, GAK, TMEM175, DGKQ, SLC26A1, IDUA, FGFRL1, RNF212, TMED11P, SPON2, LOC100130872, CTBP1, CTBP1-AS2, MAEA, UVSSA, CRIPAK, FAM53A, SLBP, TMEM129, TACC3, FGFR3, LETM1, WHSC1, SCARNA22, NELFA, MIR943, C4orf48, NAT8L, POLN, HAUS3, MXD4, MIR4800, ZFYVE28, LOC402160, RNF4, FAM193A, TNIP2…	S100P, RCHY1, FGF2, FGFR3, FIP1L1, RASSF6, CHIC2, SYNPO2, FRYL, REST, TET2, MAD2L1, NR3C2, NUDT6, FAT1, KIT, WHSC1, AFF1, NFKB1, ING2, RAP1GDS1, EIF4E, AREG, LEF1, FBXW7, SORBS2, PDGFRA, TACC3, HNRNPD, NPY1R, RASL11B, RHOH, PTPN13, MAPK10, SPP1	hsa-mir-571, ACA11, hsa-mir-943, hsa-mir-4274, hsa-mir-95, hsa-mir-548i-2, hsa-mir-3138, hsa-mir-572, hsa-mir-218-1, hsa-mir-573, hsa-mir-4275, hsa-mir-1255b-1, hsa-mir-574, HBI-6, hsa-mir-1269, hsa-mir-575, hsa-mir-1255a, hsa-mir-576, hsa-mir-297, hsa-mir-367, hsa-mir-302d, hsa-mir-302a, hsa-mir-302c, hsa-mir-302b, hsa-mir-1243, hsa-mir-577, hsa-mir-1973, ACA24, hsa-mir-2054, hsa-mir-3139, hsa-m…	C-4FYJV	C-7HDOD	chr4:68345-190957473
UPN11	Gain	2.9	5	q35.3	p15.33	1035	180606	153797	arr[hg19] 5p15.33q35.3(113,576-180,719,789)x2-3	PLEKHG4B, LRRC14B, CCDC127, SDHA, PDCD6, AHRR, C5orf55, EXOC3, PP7080, SLC9A3, MIR4456, LOC100996325, CEP72, TPPP, ZDHHC11, BRD9, TRIP13, LOC100506688, NKD2, SLC12A7, MIR4635, SLC6A19, SLC6A18, TERT, MIR4457, CLPTM1L, SLC6A3, LPCAT1, SDHAP3, LOC728613, MIR4277, MRPL36, NDUFS6, IRX4, IRX2, C5orf38, LOC285577, IRX1, LOC340094, ADAMTS16, KIAA0947, FLJ33360, MED10, UBE2QL1, LOC255167, NSUN2, SRD5A1, …	SPINK7, SEPP1, TGFBI, PDGFRB, EGR1, EBF1, HDAC3, MSH3, ACSL6, DAB2, IQGAP2, TLX3, PTTG1, LOX, SNX2, IL3, MAPK9, APC, LIFR, NPM1, GNB2L1, CCNB1, NKX2-5, FST, NR3C1, CSF1R, IL7R, RANBP17, TSLP, IRF1, AFF4, FNIP1, SSBP2, ERCC8, MEF2C, PDCD6, VCAN, CSNK1A1, GZMA, TRIO, TNIP1, NSD1, ARHGAP26, ENC1, ITK, PRLR	hsa-mir-4277, hsa-mir-4278, SNORD123, hsa-mir-887, hsa-mir-4279, hsa-mir-579, hsa-mir-580, HBII-240, hsa-mir-1274a, hsa-mir-581, hsa-mir-449a, hsa-mir-449b, hsa-mir-449c, hsa-mir-582, HBI-115, U109, hsa-mir-4280, hsa-mir-9-2, hsa-mir-2277, hsa-mir-583, hsa-mir-548p, hsa-mir-548f-3, ACA13, hsa-mir-1244-2, hsa-mir-1289-2, hsa-mir-886, hsa-mir-874, U63, U19, hsa-mir-584, hsa-mir-143, hsa-mir-145, hs…	S-3RLNJ	C-6SEKW	chr5:113576-180719789
UPN11	Gain	2.92	6	q27	p25.3	1220	170763	155053	arr[hg19] 6p25.3q27(156,974-170,919,482)x2-3	DUSP22, IRF4, EXOC2, HUS1B, LOC285768, FOXQ1, FOXF2, FOXC1, GMDS, LOC100508120, C6orf195, MYLK4, WRNIP1, SERPINB1, MIR4645, MGC39372, SERPINB9, SERPINB6, DKFZP686I15217, NQO2, HTATSF1P2, RIPK1, BPHL, TUBB2A, LOC100507194, TUBB2B, PSMG4, SLC22A23, PXDC1, FAM50B, PRPF4B, FAM217A, C6orf201, ECI2, CDYL, RPP40, PPP1R3G, LYRM4, MIR3691, FARS2, NRN1, F13A1, LY86-AS1, LY86, RREB1, SSR1, CAGE1, RIOK1, DSP…	CD109, CEP85L, PPARD, CTGF, MLLT4, IGF2R, DAXX, CCND3, AHI1, BCLAF1, FOXO3, SOX4, ID4, LIN28B, CCNC, PLAGL1, FGFR1OP, SESN1, IRF4, TFAP2A, TNFAIP3, IER3, DEK, DDR1, CDKN1A, FANCE, LATS1, PRDM1, THBS2, DDX43, CITED2, BAK1, MYB, JARID2, CASP8AP2 , POLH, HIST1H2BH, WISP3, IL17A, HIST1H3F, HMGA1, EEF1A1, HFE, RUNX2, MAPK13, TFEB, ZFAND3, EPHA7, CAGE1, RNF217-AS1, hsa-mir-548a-2, AKAP12, AGER, MAP3K7,…	hsa-mir-548a-1, hsa-mir-3143, U32B, hsa-mir-877, U83, U84, ACA38, U48, U52, hsa-mir-1236, hsa-mir-219-1, hsa-mir-1275, hsa-mir-586, hsa-mir-206, hsa-mir-133b, hsa-mir-548u, hsa-mir-30c-2, hsa-mir-30a, hsa-mir-4282, U50, U50B, hsa-mir-2113, hsa-mir-587, hsa-mir-548b, hsa-mir-3144, hsa-mir-588, U101, HBII-429, ACA33, hsa-mir-548a-2, hsa-mir-3145, hsa-mir-1273c, hsa-mir-1202, ACA20, ACA29, hsa-mir-1…	C-3GOBV	C-5ELRJ	chr6:156974-170919482
UPN11	Gain	3	8	q24.3	p23.3	837	146138	125254	arr[hg19] 8p23.3q24.3(158,048-146,295,771)x3	RPL23AP53, ZNF596, FAM87A, FBXO25, TDRP, ERICH1, ERICH1-AS1, LOC286083, DLGAP2, CLN8, MIR596, ARHGEF10, KBTBD11, MYOM2, CSMD1, LOC100287015, MCPH1, ANGPT2, AGPAT5, MIR4659A, MIR4659B, XKR5, LOC100652791, DEFB1, DEFA6, DEFA4, DEFA8P, DEFA9P, DEFA10P, DEFA1, DEFA1B, DEFT1P, DEFT1P2, DEFA3, DEFA11P, DEFA5, LINC00965, FAM66B, DEFB109P1B, USP17L1P, USP17L4, ZNF705G, DEFB4B, DEFB103B, DEFB103A, SPAG11B…	PTK2, COX6C, DEFB1, MTUS1, ASH2L, NBN, RUNX1T1, ADAM9, NDRG1, TPD52, EIF4EBP1, PSCA, TP53INP1, TNFRSF11B, BOP1, LOXL2, FGFR1, MAFA, SNAI2, NCOA2, MYC, PTK2B, WRN, WHSC1L1, HAS2, RNF139, PCM1, IDO2, NAT2, PLAG1, TACC1, PAG1, NKX3-1, ENPP2, MCPH1, TOX, MYBL1, DLC1, IDO1, KAT6A, CTHRC1, EBAG9, RECQL4, CTSB, CYP7A1, NAT1, EXT1, CYP7B1, TNKS, KIAA1967, CLU, RHOBTB2, BAALC, GGH, WWP1, RAD21	hsa-mir-596, hsa-mir-548i-3, hsa-mir-597, hsa-mir-124-1, hsa-mir-4286, hsa-mir-1322, hsa-mir-598, hsa-mir-383, hsa-mir-548v, hsa-mir-320a, hsa-mir-548h-4, hsa-mir-4287, hsa-mir-4288, hsa-mir-3148, U13, hsa-mir-486, U54, hsa-mir-124-2, HBII-276, hsa-mir-2052, hsa-mir-3149, hsa-mir-3150, U72, hsa-mir-599, hsa-mir-875, hsa-mir-1273, hsa-mir-3151, hsa-mir-548a-3, hsa-mir-2053, hsa-mir-548d-1, hsa-mir…	C-5YVTF	C-3WEHE	chr8:158048-146295771
UPN11	Gain	2.91	10	q26.3	p15.3	921	135327	133229	arr[hg19] 10p15.3q26.3(100,026-135,427,143)x2-3	ZMYND11, DIP2C, MIR5699, PRR26, LARP4B, GTPBP4, IDI2, IDI2-AS1, IDI1, WDR37, LINC00200, ADARB2, ADARB2-AS1, LINC00700, LINC00701, PFKP, PITRM1, PITRM1-AS1, KLF6, LINC00704, LINC00705, AKR1E2, AKR1C6P, AKR1C1, AKR1C2, AKR1C3, AKR1CL1, AKR1C4, UCN3, TUBAL3, NET1, CALML5, CALML3, ASB13, FAM208B, GDI2, ANKRD16, FBXO18, IL15RA, IL2RA, RBM17, PFKFB3, MIR3155A, MIR3155B, LOC399715, PRKCQ, PRKCQ-AS1, LIN…	GATA3, SIRT1, MLLT10, FGFR2, DMBT1, KLF6, BNIP3, NT5C2, LGI1, ZMIZ1, HTRA1, TLX1, ADAM12, AKR1C3, KAT6B, ERCC6, NCOA4, AIFM2, ALOX5, PDCD4, DKK1, FGF8, LDB1, BMI1, PTEN, ARID5B, NET1, BLNK, BTRC, ADD3, LOXL4, SNCG, NFKB2, TET1, EIF3A, BAG3, PSAP, MXI1, PAX2, MRC1, RHOBTB1, MAPK8, CCDC6, ABI1, RET	hsa-mir-3155, hsa-mir-548q, hsa-mir-4293, hsa-mir-1265, hsa-mir-511-1, hsa-mir-511-2, hsa-mir-1915, hsa-mir-603, hsa-mir-604, hsa-mir-938, hsa-mir-3156-1, hsa-mir-4294, hsa-mir-605, hsa-mir-548f-1, hsa-mir-1296, HBII-419, hsa-mir-1254, hsa-mir-606, hsa-mir-346, hsa-mir-107, hsa-mir-3157, hsa-mir-607, hsa-mir-1287, U108, hsa-mir-608, hsa-mir-3158-2, hsa-mir-3158-1, hsa-mir-146b, hsa-mir-1307, hsa-…	C-4CDQJ	C-5DPFD	chr10:100026-135427143
UPN11	Gain	2.92	11	q25	p15.5	1459	134708	136510	arr[hg19] 11p15.5q25(230,615-134,938,470)x2-3	SIRT3, PSMD13, NLRP6, ATHL1, IFITM5, IFITM2, IFITM1, IFITM3, B4GALNT4, PKP3, SIGIRR, ANO9, PTDSS2, RNH1, HRAS, LRRC56, C11orf35, RASSF7, MIR210HG, MIR210, LOC143666, PHRF1, IRF7, CDHR5, SCT, DRD4, DEAF1, TMEM80, EPS8L2, TALDO1, PDDC1, NS3BP, CEND1, SLC25A22, PIDD, RPLP2, SNORA52, PNPLA2, EFCAB4A, CD151, POLR2L, TSPAN4, CHID1, AP2A2, MUC6, MUC2, MUC5B, TOLLIP, TOLLIP-AS1, BRSK2, MOB2, DUSP8, KRTAP…	ARHGAP20, PTPRJ, ATM, MRE11A, CASP1, ZBTB16, FANCF, SPI1, OPCML, MUC6, KIAA1549L (C11orf41), KMT2A, CLP1, MUC2, VEGFB, LMO2, PAX6, MIR125B1, SPA17, DNAJC4, NUDT22, MLL, RAG1, DDB2, FKBP2, H2AFX, FAU, INPPL1, C11orf30, RELA, BIRC2, ORAOV1, MYEOV, CD82, NPAT, PAK1, FEN1, STIP1, CST6, RAD9A, DDX10, EIF3F, HTATIP2, PICALM, TAGLN, APLNR, PLCB3, RAG2, KAT5, GAB2, RRM1, CBL, CD248, B3GNT6, PPP1R14B, HRA…	hsa-mir-210, ACA52, hsa-mir-4298, hsa-mir-675, hsa-mir-483, ACA54, hsa-mir-302e, ACA3, ACA3-2, ACA23, U97, hsa-mir-4299, U14B, U14A, hsa-mir-3159, hsa-mir-610, hsa-mir-670, hsa-mir-129-2, hsa-mir-3160-1, hsa-mir-3160-2, HBII-166, hsa-mir-3161, hsa-mir-130a, hsa-mir-3162, hsa-mir-611, hsa-mir-1908, U99, U22, U31, U30, U29, U28, U27, U26, U25, hsa-mir-1237, hsa-mir-192, hsa-mir-194-2, hsa-mir-612, …	C-4LXKK	S-3EDHX	chr11:230615-134938470
UPN11	Gain	2.84	12	q24.33	p12.1	899	108397	102458	arr[hg19] 12p12.1q24.33(25,381,357-133,777,902)x2-3	KRAS, IFLTD1, MIR4302, RASSF8-AS1, RASSF8, BHLHE41, SSPN, ITPR2, ASUN, FGFR1OP2, TM7SF3, MED21, C12orf71, STK38L, ARNTL2, SMCO2, PPFIBP1, REP15, MRPS35, MANSC4, KLHL42, PTHLH, CCDC91, FAR2, ERGIC2, OVCH1-AS1, OVCH1, TMTC1, IPO8, CAPRIN2, LINC00941, TSPAN11, DDX11-AS1, DDX11, FAM60A, FLJ13224, DENND5B, DENND5B-AS1, METTL20, AMN1, H3F3C, KIAA1551, RNU6-78P, BICD1, FGD4, DNM1L, YARS2, PKP2, SYT10, A…	DDIT3, USP15, RAN, HNRNPA1 , P2RX7, PTHLH, GLI1, AGAP2, FBRSL1, PEBP1, KITLG, ELK3, HMGA2, ASCL1, SMARCC2, IL22, ATF1, BTG1, SLC5A8, DRAM1, PPFIBP1, IL23A, MDM2, EP400, TSPAN8, ALDH2, RAP1B, DUSP6, PTPN11, CHFR, HOXC13, SH2B3, CDK4, PA2G4, PRKAB1, PXN, PAWR, METAP2, APAF1, HOXC11, TRIAP1, DENR, SARNP, SOCS2, HRK, KRAS	hsa-mir-4302, ACA34, hsa-mir-1291, ACA2a, ACA2b, hsa-mir-1293, hsa-mir-196a-2, hsa-mir-615, hsa-mir-148b, U59B, U59A, hsa-mir-1228, hsa-mir-616, hsa-mir-26a-2, hsa-let-7i, hsa-mir-548c, U70G, hsa-mir-1279, hsa-mir-1252, hsa-mir-617, hsa-mir-618, hsa-mir-492, hsa-mir-331, hsa-mir-1251, hsa-mir-135a-2, hsa-mir-4303, ACA53, hsa-mir-1827, hsa-mir-619, hsa-mir-1302-1, hsa-mir-620, hsa-mir-1178, hsa-mi…	C-3XJRH	C-7PNZW	chr12:25381357-133777902
UPN11	Gain	3	14	q32.33	q11.2	770	86773.8	85690	arr[hg19] 14q11.2q32.33(20,511,672-107,285,437)x3	OR4L1, OR4K17, OR4N5, OR11G2, OR11H6, OR11H4, TTC5, CCNB1IP1, SNORD126, RPPH1, PARP2, TEP1, KLHL33, OSGEP, APEX1, TMEM55B, PNP, RNASE10, RNASE9, RNASE11, RNASE12, OR6S1, ANG, RNASE4, EDDM3A, EDDM3B, RNASE6, RNASE1, RNASE3, ECRP, RNASE2, METTL17, SLC39A2, NDRG2, TPPP2, RNASE13, RNASE7, RNASE8, ARHGEF40, ZNF219, TMEM253, OR5AU1, LINC00641, HNRNPC, RPGRIP1, SUPT16H, CHD8, SNORD9, SNORD8, RAB2B, TOX4…	PAX9, STRN3, NIN, GPHN, PTPN21, MTA1, JAG2, SEL1L, TRA, EML1, NDRG2, SIX1, DPF3, NUMB, VRK1, MMP14, TRAF3, FOXA1, TCL6, PRKD1, NKX2-1, FUT8, IGH@, TRA@, TRD@, TSHR, ANG, XRCC3, ZFP36L1, TCL1B, AKT1, OTX2, TCL1A, DIO2, TRD, GPR68, MEG3, BCL11B, TRIP11, LGALS3, ESR2, SAV1, IGH	hsa-mir-1201, SNORD126, mgU6-53B, mgU6-53, hsa-mir-208a, hsa-mir-208b, hsa-mir-4307, hsa-mir-3171, hsa-mir-624, hsa-mir-3172, SNORD127, hsa-mir-4308, hsa-mir-548h-1, hsa-mir-625, hsa-mir-1260, ACA65, SNORA11B, hsa-mir-3173, U93, hsa-mir-342, hsa-mir-345, hsa-mir-770, hsa-mir-493, hsa-mir-337, hsa-mir-665, hsa-mir-431, hsa-mir-433, hsa-mir-127, hsa-mir-432, hsa-mir-136, 14q(0), hsa-mir-370, 14q(I-…	S-4ETOO	S-3HXYB	chr14:20511672-107285437
UPN11	Gain	2.85	17	q25.3	p13.3	1373	81041.4	73347	arr[hg19] 17p13.3q25.3(525-81,041,938)x2-3	DOC2B, RPH3AL, LOC100506388, C17orf97, FAM101B, VPS53, FAM57A, GEMIN4, DBIL5P, GLOD4, RNMTL1, NXN, TIMM22, ABR, MIR3183, BHLHA9, TUSC5, YWHAE, CRK, MYO1C, INPP5K, PITPNA-AS1, PITPNA, SLC43A2, SCARF1, RILP, PRPF8, TLCD2, MIR22HG, MIR22, WDR81, SERPINF2, SERPINF1, SMYD4, RPA1, RTN4RL1, DPH1, OVCA2, MIR132, MIR212, HIC1, SMG6, SRR, TSR1, SNORD91B, SNORD91A, SGSM2, MNT, LOC284009, METTL16, PAFAH1B1, …	ALOX12, MLLT6, HLF, CRLF3, TP53, KSR1, BRCA1, PYY, PPM1D, FAM57A, RABEP1, GSDMA, TAF15, AATF, NF1, BCAS3, SPECC1, PER1, SLC9A3R1, RPL26, USP6, SHBG, PRKAR1A, RNF213, TIMP2, XAF1, IGF2BP1, RAD51D, STARD3, GRB2, HIC1, ELAC2, RAC3, SUZ12P, ERBB2, WRAP53, CASC3, SLC4A1, CLTC, SEPT9, CLDN7, TRIM37, DDX5, AXIN2, SRSF2, ALOX15, MSI2, ASPSCR1, MIR21, GAS7, NCOR1, ETV4, IKZF3, CDC6, KDM6B, RARA, TRPV1, LA…	hsa-mir-3183, hsa-mir-22, hsa-mir-132, hsa-mir-212, HBII-296B, HBII-296A, hsa-mir-1253, hsa-mir-195, hsa-mir-497, hsa-mir-324, ACA48, mgU6-77, U67, ACA68, hsa-mir-4314, U8, hsa-mir-744, hsa-mir-548h-3, hsa-mir-1288, U49B, U49A, HBII-135, hsa-mir-33b, U3-2, U3-2B, U3-4, U3, U3-3, hsa-mir-1180, ACA59B, U42B, mgh18S-121, U42A, Z17B, hsa-mir-451, hsa-mir-144, hsa-mir-423, hsa-mir-3184, hsa-mir-193a, …	C-5VAZU	S-4LRWR	chr17:525-81041938
UPN11	Gain	2.91	18	q23	p11.32	342	77877.9	66936	arr[hg19] 18p11.32q23(136,226-78,014,123)x2-3	USP14, THOC1, COLEC12, CETN1, CLUL1, C18orf56, TYMS, ENOSF1, YES1, ADCYAP1, LINC00470, METTL4, NDC80, CBX3P2, SMCHD1, EMILIN2, LPIN2, LOC727896, MYOM1, MYL12A, MYL12B, TGIF1, DLGAP1, DLGAP1-AS1, DLGAP1-AS3, DLGAP1-AS4, DLGAP1-AS5, C18orf42, LINC00526, LINC00667, ZBTB14, EPB41L3, LOC645355, MIR3976, TMEM200C, L3MBTL4, MIR4317, LOC100130480, ARHGAP28, LINC00668, LAMA1, LRRC30, PTPRM, LOC100192426, …	SS18, MBD2, MALT1, DSG2, GATA6, PHLPP1, DCC, PTPN2, MAPK4, SMAD4, SLC39A6, BCL2, SETBP1, SMAD2, EPB41L3, RBBP8, SERPINB5, ZNF521	hsa-mir-4317, hsa-mir-3156-2, hsa-mir-320c-1, hsa-mir-133a-1, hsa-mir-1-2, hsa-mir-320c-2, hsa-mir-302f, hsa-mir-187, hsa-mir-4318, hsa-mir-924, hsa-mir-4319, hsa-mir-1539, U58C, U58A, U58B, mgU12-22/U4-8, U91, hsa-mir-4320, ACA37, hsa-mir-122	C-7KBTZ	C-6HGFA	chr18:136226-78014123
UPN11	Gain	4	21	q22.3	q11.2	293	33090.9	33620	arr[hg19] 21q11.2q22.3(15,006,457-48,097,372)x4	POTED, C21orf15, ANKRD20A11P, LIPI, RBM11, ABCC13, HSPA13, SAMSN1, SAMSN1-AS1, LOC388813, NRIP1, USP25, LINC00478, MIR99A, MIRLET7C, MIR125B2, C21orf37, CXADR, BTG3, C21orf91-OT1, C21orf91, CHODL-AS1, CHODL, TMPRSS15, LINC00320, NCAM2, RNU6-67P, LINC00317, LINC00308, D21S2088E, LOC339622, LINC00158, MIR155HG, MIR155, LINC00515, MRPL39, JAM2, ATP5J, GABPA, APP, CYYR1, ADAMTS1, ADAMTS5, MIR4759, MI…	U2AF1, PTTG1IP, TIAM1, MIR125B2, OLIG2, CSTB, ADAMTS1, NRIP1, TFF3, TFF2, TMPRSS3, ERG, ETS2, DYRK1A, TFF1, TMPRSS2, RUNX1, S100B	hsa-mir-3118-5, hsa-mir-99a, hsa-let-7c, hsa-mir-125b-2, hsa-mir-548x, hsa-mir-155, hsa-mir-4327, ACA67, hsa-mir-802, hsa-mir-3197	C-6OPRF	C-3ELOA	chr21:15006457-48097372
UPN11	Gain	3	X	q28	p22.33	1020	155065	189818	arr[hg19] Xp22.33q28(168,546-155,233,731)x3	PLCXD1, GTPBP6, LINC00685, PPP2R3B, SHOX, CRLF2, CSF2RA, MIR3690, IL3RA, SLC25A6, ASMTL-AS1, ASMTL, P2RY8, AKAP17A, ASMT, DHRSX, ZBED1, CD99P1, LINC00102, CD99, XG, XGPY2, GYG2, ARSD, ARSE, ARSH, ARSF, CXorf28, MXRA5, PRKX, LOC389906, NLGN4X, MIR4770, VCX3A, HDHD1, MIR4767, STS, VCX, PNPLA4, MIR651, VCX2, VCX3B, KAL1, FAM9A, FAM9B, TBL1X, GPR143, SHROOM2, LOC100288814, WWC3, CLCN4, MID1, HCCS, AR…	PHF6, RPL10, GATA1, GPC3, DKC1, DACH2, MIR221, L1CAM, STAG2, ARMCX1, IL3RA, CXCR3, MTCP1, SEPT6, FOXP3, FAM123B, NONO, RBBP7, RHOXF2, ZRSR2, ARMCX3, MSN, P2RY8, AIFM1, ARMCX2, KDM6A, ELF4, REPS2, Sep.06, SSX2, BRWD3, ZBTB33, TFE3, MIR222, AR, BTK, AMOT, BCOR, FOXO4, SPANXA1, CRLF2	hsa-mir-651, hsa-mir-1308, ACA12, hsa-mir-548f-5, hsa-mir-221, hsa-mir-222, SNORA11C, hsa-mir-532, hsa-mir-188, hsa-mir-500, hsa-mir-362, hsa-mir-501, hsa-mir-500b, hsa-mir-660, hsa-mir-502, SNORA11E, SNORA11D, hsa-mir-98, hsa-let-7f-2, U107, hsa-mir-1468, hsa-mir-223, hsa-mir-421, hsa-mir-374b, hsa-mir-545, hsa-mir-374a, hsa-mir-384, hsa-mir-325, hsa-mir-4328, hsa-mir-548i-4, hsa-mir-1321, hsa-m…	C-5QGHR	C-6KTXX	chrX:168546-155233731
UPN11	Loss	1	12	p13.2	p13.2	2	16.22	26	arr[hg19] 12p13.2(11,943,589-11,959,809)x1	ETV6, RNU6-19P	ETV6		C-7OOTV	C-3MFOX	chr12:11943589-11959809
UPN12	LOH		13	q34	q11	459	95656.9	27733	arr[hg19] 13q11q34(19,438,806-115,095,705) hmz	ANKRD20A9P, LINC00442, RNU6-52P, TUBA3C, ANKRD26P3, LINC00421, TPTE2, MPHOSPH8, PSPC1, ZMYM5, ZMYM2, GJA3, GJB2, GJB6, CRYL1, MIR4499, IFT88, IL17D, N6AMT2, XPO4, LATS2, SAP18, SKA3, MRP63, MIPEPP3, ZDHHC20, MICU2, FGF9, LINC00424, BASP1P1, SGCG, SACS, SACS-AS1, LINC00327, TNFRSF19, MIPEP, C1QTNF9B-AS1, C1QTNF9B, ANKRD20A19P, SPATA13, MIR2276, SPATA13-AS1, C1QTNF9, PARP4, TPTE2P6, ATP12A, RNF17, …	DLEU1, POU4F1, STARD13, KCNRG, RAP2A, ST13P4, KLF5, TRIM13, FOXO1, LATS2, BRCA2, DLEU7, hsa-mir-16-1, OLFM4, SERP2, hsa-mir-15a, GPC5, LHFP, PAN3, ELF1, DACH1, PDX1, RB1, LCP1, FLT3, HSPH1, INTS6, DGKH, ERCC5, ZMYM2, DLEU2, CDX2	hsa-mir-2276, U102, ACA27, hsa-mir-4305, hsa-mir-320d-1, hsa-mir-621, hsa-mir-3168, ACA31, hsa-mir-16-1, hsa-mir-15a, hsa-mir-759, hsa-mir-1297, hsa-mir-3169, hsa-mir-622, hsa-mir-17, hsa-mir-18a, hsa-mir-19a, hsa-mir-20a, hsa-mir-19b-1, hsa-mir-92a-1, hsa-mir-3170, hsa-mir-623, hsa-mir-4306, hsa-mir-1267	S-3OKVX	S-4DINU	chr13:19438806-115095705
UPN12	Gain	3	1	q44	q21.1	1130	104329	104302	arr[hg19] 1q21.1q44(144,895,696-249,224,684)x3	LOC100288142, NBPF9, PDE4DIP, SEC22B, NOTCH2NL, NBPF10, HFE2, TXNIP, POLR3GL, ANKRD34A, LIX1L, RBM8A, GNRHR2, PEX11B, ITGA10, ANKRD35, PIAS3, NUDT17, POLR3C, RNF115, CD160, PDZK1, GPR89A, GPR89C, PDZK1P1, NBPF24, NBPF11, HYDIN2, NBPF12, LOC728989, NBPF13P, PRKAB2, PDIA3P, FMO5, CHD1L, LINC00624, BCL9, ACP6, GJA5, GJA8, GPR89B, NBPF8, MIR5087, FLJ39739, PPIAL4B, PPIAL4A, PPIAL4D, PPIAL4F, NBPF14, …	CREG1, FCGR2B, EGLN1, MAPKAPK2, RCSD1, ADIPOR1, PTPRC, CRTC2, SHC1, PRCC, CKS1B, ATF3, S100A10, BCL9, PIAS3, KCNH1, CENPF, GAS5, ABL2, IGSF8, SMYD3, MEF2D, SMYD2, PLA2G4A, S100A1, RPS27, PBX1, TNFSF18, PVRL4, PRRX1, TP53BP2, CDC73, DUSP10, RGS2, PTPN7, S100A4, ASPM, S100A13, DHX9, TPM3, ARHGEF2, S100A9, MIXL1, TPR, ENAH, PTGS2, USF1, MLLT11, GLRX2, ESRRG, SDHC, AKT3, PSEN2, ARNT, S100A8, PDE4DIP,…	hsa-mir-4257, hsa-mir-554, hsa-mir-190b, hsa-mir-4258, hsa-mir-92b, hsa-mir-555, ACA42, ACA26, hsa-mir-9-1, hsa-mir-765, hsa-mir-4259, hsa-mir-556, hsa-mir-921, hsa-mir-1255b-2, hsa-mir-557, hsa-mir-3119-1, hsa-mir-3119-2, hsa-mir-1295, hsa-mir-214, hsa-mir-3120, hsa-mir-199a-2, U81, U47, U80, U79, U78, U44, U77, U76, U75, U74, HBI-100, hsa-mir-488, hsa-mir-3121, hsa-mir-1278, hsa-mir-181b-1, hsa…	C-3ALEV	C-4YYLK	chr1:144895696-249224684
UPN12	Gain	2.5	2	q37.3	p25.3	1494	242771	206547	arr[hg19] 2p25.3q37.3(12,770-242,783,384)x2-3	FAM110C, SH3YL1, ACP1, FAM150B, TMEM18, LOC339822, SNTG2, TPO, PXDN, MYT1L, LOC730811, TSSC1, TRAPPC12, ADI1, RNASEH1, LOC100506054, RPS7, COLEC11, ALLC, LOC100505964, LOC727982, SOX11, LOC150622, LOC400940, LINC00487, CMPK2, RSAD2, RNF144A-AS1, RNF144A, LOC100506274, LOC339788, LINC00299, ID2, KIDINS220, MBOAT2, ASAP2, ITGB1BP1, CPSF3, IAH1, ADAM17, YWHAQ, TAF1B, GRHL1, KLF11, CYS1, RRM2, C2orf4…	ERCC3, ZEB2, MIR10B, CAPG, ALK, DIRC3, RTN4, SDC1, MSH6, BIRC6, PMS1, THADA, HOXD13, FHL2, BRE, BUB1, ATF2, LOXL3, PAX8, PTMA, EML4, BCL11A, FBXO11, KCMF1, SF3B1, CFLAR, BOK, EPCAM, DIRC1, MTA3, XPO1, RANBP2, CXCR7, NLRC4, PDE11A, MYCN, ATIC, ACVR2A, MAL, TGFBRAP1, STRN, LHCGR, INPP5D, IL1B, TTL, ADAM17, IGK, SEPT2, MAP2, TMSB10, DDX1, ADAM23, HOXD11, BARD1, SOX11, IKZF2, PAX3, REL, DNMT3A, HSPD1…	hsa-mir-4261, ACA67B, hsa-mir-548s, hsa-mir-4262, hsa-mir-3125, hsa-mir-1301, hsa-mir-4263, HBII-316, U53, hsa-mir-558, hsa-mir-559, hsa-mir-217, hsa-mir-216a, hsa-mir-216b, U70B, hsa-mir-3126, SNORA36C, hsa-mir-1285-2, hsa-mir-4264, U94, hsa-mir-3127, HBII-289, hsa-mir-4265, hsa-mir-4266, hsa-mir-4267, hsa-mir-1302-3, hsa-mir-663b, hsa-mir-128-1, U70F, hsa-mir-933, hsa-mir-10b, hsa-mir-1246, hsa…		C-4FPKL	chr2:12770-242783384
UPN12	Gain	3	3	q29	p26.3	1279	197790	178050	arr[hg19] 3p26.3q29(61,891-197,851,986)x3	CHL1, CNTN6, CNTN4, CNTN4-AS2, IL5RA, TRNT1, CRBN, LRRN1, SETMAR, SUMF1, ITPR1, EGOT, BHLHE40-AS1, BHLHE40, ARL8B, EDEM1, MIR4790, GRM7, LMCD1-AS1, LMCD1, LINC00312, SSUH2, CAV3, OXTR, RAD18, SRGAP3, SRGAP3-AS3, THUMPD3, SETD5-AS1, SETD5, LHFPL4, MTMR14, CPNE9, BRPF1, OGG1, CAMK1, TADA3, ARPC4, ARPC4-TTLL3, TTLL3, RPUSD3, CIDEC, JAGN1, IL17RE, IL17RC, CRELD1, PRRT3, PRRT3-AS1, EMC3, LOC401052, CI…	CSTA, RNF7, PIK3CA, SEMA3B, ATR, MLF1, CISH, FAM107A, GSK3B, FAIM, SATB1, LIMD1, SEMA3F, XPC, PTPRG, TNFSF10, DIRC2, MME, BTLA, RPN1, KIAA1524, ARL8B, HSPBAP1, TBL1XR1, PPARG, WNT5A, FHIT, EDEM1, RASSF1, PLD1, BCL6, CDC25A, FANCD2, PLCD1, MUC4, MBD4, RAP2B, TCTA, MST1R, PRKCD, MAP4, PLXNB1, RUVBL1, EIF4A2, VHL, MLH1, LRIG1, GHRL, NCKIPSD, SMARCC1, RARRES1, TFRC, BAP1, MUC13, HYAL1, CD200, GMPS, C…	hsa-mir-378b, hsa-mir-885, ACA7, hsa-mir-4270, hsa-mir-3134, hsa-mir-563, hsa-mir-3135, hsa-mir-466, hsa-mir-128-2, hsa-mir-26a-1, ACA6, E2, hsa-mir-138-1, hsa-mir-564, hsa-mir-1226, hsa-mir-2115, hsa-mir-711, hsa-mir-425, hsa-mir-191, hsa-mir-4271, hsa-mir-566, hsa-let-7g, hsa-mir-135a-1, HBII-108, HBII-108B, HBII-210, hsa-mir-4272, hsa-mir-3136, hsa-mir-1284, hsa-mir-1324, hsa-mir-4273, hsa-mir…	C-4GDNQ	C-4SLRH	chr3:61891-197851986
UPN12	Gain	3	4	q21.21	p16.3	439	79444.4	63252	arr[hg19] 4p16.3q21.21(68,345-79,512,725)x3	ZNF595, ZNF718, ZNF876P, ZNF732, ZNF141, ABCA11P, ZNF721, PIGG, PDE6B, ATP5I, MYL5, MFSD7, PCGF3, LOC100129917, CPLX1, GAK, TMEM175, DGKQ, SLC26A1, IDUA, FGFRL1, RNF212, TMED11P, SPON2, LOC100130872, CTBP1, CTBP1-AS2, MAEA, UVSSA, CRIPAK, FAM53A, SLBP, TMEM129, TACC3, FGFR3, LETM1, WHSC1, SCARNA22, NELFA, MIR943, C4orf48, NAT8L, POLN, HAUS3, MXD4, MIR4800, ZFYVE28, LOC402160, RNF4, FAM193A, TNIP2…	S100P, RCHY1, FGFR3, FIP1L1, RASSF6, CHIC2, FRYL, REST, KIT, WHSC1, AREG, PDGFRA, TACC3, RASL11B, RHOH	hsa-mir-571, ACA11, hsa-mir-943, hsa-mir-4274, hsa-mir-95, hsa-mir-548i-2, hsa-mir-3138, hsa-mir-572, hsa-mir-218-1, hsa-mir-573, hsa-mir-4275, hsa-mir-1255b-1, hsa-mir-574, HBI-6, hsa-mir-1269	C-4FYJV	C-6YKXB	chr4:68345-79512725
UPN12	Gain	3	5	q35.3	p15.33	1035	180606	153797	arr[hg19] 5p15.33q35.3(113,576-180,719,789)x3	PLEKHG4B, LRRC14B, CCDC127, SDHA, PDCD6, AHRR, C5orf55, EXOC3, PP7080, SLC9A3, MIR4456, LOC100996325, CEP72, TPPP, ZDHHC11, BRD9, TRIP13, LOC100506688, NKD2, SLC12A7, MIR4635, SLC6A19, SLC6A18, TERT, MIR4457, CLPTM1L, SLC6A3, LPCAT1, SDHAP3, LOC728613, MIR4277, MRPL36, NDUFS6, IRX4, IRX2, C5orf38, LOC285577, IRX1, LOC340094, ADAMTS16, KIAA0947, FLJ33360, MED10, UBE2QL1, LOC255167, NSUN2, SRD5A1, …	SPINK7, SEPP1, TGFBI, PDGFRB, EGR1, EBF1, HDAC3, MSH3, ACSL6, DAB2, IQGAP2, TLX3, PTTG1, LOX, SNX2, IL3, MAPK9, APC, LIFR, NPM1, GNB2L1, CCNB1, NKX2-5, FST, NR3C1, CSF1R, IL7R, RANBP17, TSLP, IRF1, AFF4, FNIP1, SSBP2, ERCC8, MEF2C, PDCD6, VCAN, CSNK1A1, GZMA, TRIO, TNIP1, NSD1, ARHGAP26, ENC1, ITK, PRLR	hsa-mir-4277, hsa-mir-4278, SNORD123, hsa-mir-887, hsa-mir-4279, hsa-mir-579, hsa-mir-580, HBII-240, hsa-mir-1274a, hsa-mir-581, hsa-mir-449a, hsa-mir-449b, hsa-mir-449c, hsa-mir-582, HBI-115, U109, hsa-mir-4280, hsa-mir-9-2, hsa-mir-2277, hsa-mir-583, hsa-mir-548p, hsa-mir-548f-3, ACA13, hsa-mir-1244-2, hsa-mir-1289-2, hsa-mir-886, hsa-mir-874, U63, U19, hsa-mir-584, hsa-mir-143, hsa-mir-145, hs…	S-3RLNJ	C-6SEKW	chr5:113576-180719789
UPN12	Gain	3	6	q14.1	p25.3	751	77046.7	70654	arr[hg19] 6p25.3q14.1(184,718-77,231,383)x3	DUSP22, IRF4, EXOC2, HUS1B, LOC285768, FOXQ1, FOXF2, FOXC1, GMDS, LOC100508120, C6orf195, MYLK4, WRNIP1, SERPINB1, MIR4645, MGC39372, SERPINB9, SERPINB6, DKFZP686I15217, NQO2, HTATSF1P2, RIPK1, BPHL, TUBB2A, LOC100507194, TUBB2B, PSMG4, SLC22A23, PXDC1, FAM50B, PRPF4B, FAM217A, C6orf201, ECI2, CDYL, RPP40, PPP1R3G, LYRM4, MIR3691, FARS2, NRN1, F13A1, LY86-AS1, LY86, RREB1, SSR1, CAGE1, RIOK1, DSP…	CD109, PPARD, DAXX, CCND3, SOX4, ID4, IRF4, TFAP2A, IER3, DEK, DDR1, CDKN1A, FANCE, DDX43, BAK1, JARID2, POLH, HIST1H2BH, IL17A, HIST1H3F, HMGA1, EEF1A1, HFE, RUNX2, MAPK13, TFEB, ZFAND3, CAGE1, AGER, PIM1, MAPK14, NFKBIE, HIST1H4G, HIST1H4F, TNF, SMAP1, LTA, E2F3	hsa-mir-548a-1, hsa-mir-3143, U32B, hsa-mir-877, U83, U84, ACA38, U48, U52, hsa-mir-1236, hsa-mir-219-1, hsa-mir-1275, hsa-mir-586, hsa-mir-206, hsa-mir-133b, hsa-mir-548u, hsa-mir-30c-2, hsa-mir-30a, hsa-mir-4282	S-3YWRP	C-6ZPRE	chr6:184718-77231383
UPN12	Gain	3	7	q36.3	q21.13	597	70542.3	73576	arr[hg19] 7q21.13q36.3(88,577,373-159,119,707)x3	ZNF804B, DPY19L2P4, STEAP1, STEAP2, C7orf63, GTPBP10, LOC101409256, CLDN12, CDK14, FZD1, MTERF, AKAP9, CYP51A1, LRRD1, KRIT1, ANKIB1, GATAD1, PEX1, RBM48, MGC16142, FAM133B, FAM133DP, CDK6, SAMD9, SAMD9L, HEPACAM2, CCDC132, CALCR, MIR653, MIR489, MIR4652, TFPI2, GNGT1, GNG11, BET1, COL1A2, CASD1, SGCE, PEG10, PPP1R9A, PON1, PON3, PON2, ASB4, PDK4, DYNC1I1, SLC25A13, MIR591, C7orf76, LOC100506136,…	POT1, NRCAM, PEX1, AKAP9, CREB3L2, MUC17, SHH, TTC26, HBP1, TRPV6, EPHA1, CAV1, ASNS, SPAM1, RELN, ERVW-1, TRB, STEAP2, EZH2, GATAD1, MET, MNX1, STEAP1, BRAF, TAC1, TRB@, COL1A2, EZH2, NRF1, PEG10, TRIM24, ZC3HAV1, EZH2, HIPK2, CDK6, EZH2	hsa-mir-1285-1, hsa-mir-653, hsa-mir-489, hsa-mir-591, hsa-mir-25, hsa-mir-93, hsa-mir-106b, hsa-mir-4285, hsa-mir-548o, hsa-mir-592, hsa-mir-593, hsa-mir-129-1, hsa-mir-182, hsa-mir-96, hsa-mir-183, hsa-mir-335, hsa-mir-29a, hsa-mir-29b-1, hsa-mir-490, hsa-mir-548f-4, hsa-mir-1975, hsa-mir-671, hsa-mir-153-2, hsa-mir-595	C-6TLID	C-7IIDC	chr7:88577373-159119707
UPN12	Gain	3	8	q24.3	p23.3	837	146138	125254	arr[hg19] 8p23.3q24.3(158,048-146,295,771)x3	RPL23AP53, ZNF596, FAM87A, FBXO25, TDRP, ERICH1, ERICH1-AS1, LOC286083, DLGAP2, CLN8, MIR596, ARHGEF10, KBTBD11, MYOM2, CSMD1, LOC100287015, MCPH1, ANGPT2, AGPAT5, MIR4659A, MIR4659B, XKR5, LOC100652791, DEFB1, DEFA6, DEFA4, DEFA8P, DEFA9P, DEFA10P, DEFA1, DEFA1B, DEFT1P, DEFT1P2, DEFA3, DEFA11P, DEFA5, LINC00965, FAM66B, DEFB109P1B, USP17L1P, USP17L4, ZNF705G, DEFB4B, DEFB103B, DEFB103A, SPAG11B…	PTK2, COX6C, DEFB1, MTUS1, ASH2L, NBN, RUNX1T1, ADAM9, NDRG1, TPD52, EIF4EBP1, PSCA, TP53INP1, TNFRSF11B, BOP1, LOXL2, FGFR1, MAFA, SNAI2, NCOA2, MYC, PTK2B, WRN, WHSC1L1, HAS2, RNF139, PCM1, IDO2, NAT2, PLAG1, TACC1, PAG1, NKX3-1, ENPP2, MCPH1, TOX, MYBL1, DLC1, IDO1, KAT6A, CTHRC1, EBAG9, RECQL4, CTSB, CYP7A1, NAT1, EXT1, CYP7B1, TNKS, KIAA1967, CLU, RHOBTB2, BAALC, GGH, WWP1, RAD21	hsa-mir-596, hsa-mir-548i-3, hsa-mir-597, hsa-mir-124-1, hsa-mir-4286, hsa-mir-1322, hsa-mir-598, hsa-mir-383, hsa-mir-548v, hsa-mir-320a, hsa-mir-548h-4, hsa-mir-4287, hsa-mir-4288, hsa-mir-3148, U13, hsa-mir-486, U54, hsa-mir-124-2, HBII-276, hsa-mir-2052, hsa-mir-3149, hsa-mir-3150, U72, hsa-mir-599, hsa-mir-875, hsa-mir-1273, hsa-mir-3151, hsa-mir-548a-3, hsa-mir-2053, hsa-mir-548d-1, hsa-mir…	C-5YVTF	C-3WEHE	chr8:158048-146295771
UPN12	Gain	3	10	q26.3	p15.3	921	135283	133181	arr[hg19] 10p15.3q26.3(144,089-135,427,143)x3	ZMYND11, DIP2C, MIR5699, PRR26, LARP4B, GTPBP4, IDI2, IDI2-AS1, IDI1, WDR37, LINC00200, ADARB2, ADARB2-AS1, LINC00700, LINC00701, PFKP, PITRM1, PITRM1-AS1, KLF6, LINC00704, LINC00705, AKR1E2, AKR1C6P, AKR1C1, AKR1C2, AKR1C3, AKR1CL1, AKR1C4, UCN3, TUBAL3, NET1, CALML5, CALML3, ASB13, FAM208B, GDI2, ANKRD16, FBXO18, IL15RA, IL2RA, RBM17, PFKFB3, MIR3155A, MIR3155B, LOC399715, PRKCQ, PRKCQ-AS1, LIN…	GATA3, SIRT1, MLLT10, FGFR2, DMBT1, KLF6, BNIP3, NT5C2, LGI1, ZMIZ1, HTRA1, TLX1, ADAM12, AKR1C3, KAT6B, ERCC6, NCOA4, AIFM2, ALOX5, PDCD4, DKK1, FGF8, LDB1, BMI1, PTEN, ARID5B, NET1, BLNK, BTRC, ADD3, LOXL4, SNCG, NFKB2, TET1, EIF3A, BAG3, PSAP, MXI1, PAX2, MRC1, RHOBTB1, MAPK8, CCDC6, ABI1, RET	hsa-mir-3155, hsa-mir-548q, hsa-mir-4293, hsa-mir-1265, hsa-mir-511-1, hsa-mir-511-2, hsa-mir-1915, hsa-mir-603, hsa-mir-604, hsa-mir-938, hsa-mir-3156-1, hsa-mir-4294, hsa-mir-605, hsa-mir-548f-1, hsa-mir-1296, HBII-419, hsa-mir-1254, hsa-mir-606, hsa-mir-346, hsa-mir-107, hsa-mir-3157, hsa-mir-607, hsa-mir-1287, U108, hsa-mir-608, hsa-mir-3158-2, hsa-mir-3158-1, hsa-mir-146b, hsa-mir-1307, hsa-…	C-3PNCY	C-5DPFD	chr10:144089-135427143
UPN12	Gain	2.91	11	q25	p15.5	1446	133513	135107	arr[hg19] 11p15.5q25(230,615-133,743,888)x2-3	SIRT3, PSMD13, NLRP6, ATHL1, IFITM5, IFITM2, IFITM1, IFITM3, B4GALNT4, PKP3, SIGIRR, ANO9, PTDSS2, RNH1, HRAS, LRRC56, C11orf35, RASSF7, MIR210HG, MIR210, LOC143666, PHRF1, IRF7, CDHR5, SCT, DRD4, DEAF1, TMEM80, EPS8L2, TALDO1, PDDC1, NS3BP, CEND1, SLC25A22, PIDD, RPLP2, SNORA52, PNPLA2, EFCAB4A, CD151, POLR2L, TSPAN4, CHID1, AP2A2, MUC6, MUC2, MUC5B, TOLLIP, TOLLIP-AS1, BRSK2, MOB2, DUSP8, KRTAP…	ARHGAP20, PTPRJ, ATM, MRE11A, CASP1, ZBTB16, FANCF, SPI1, OPCML, MUC6, KIAA1549L (C11orf41), KMT2A, CLP1, MUC2, VEGFB, LMO2, PAX6, MIR125B1, SPA17, DNAJC4, NUDT22, MLL, RAG1, DDB2, FKBP2, H2AFX, FAU, INPPL1, C11orf30, RELA, BIRC2, ORAOV1, MYEOV, CD82, NPAT, PAK1, FEN1, STIP1, CST6, RAD9A, DDX10, EIF3F, HTATIP2, PICALM, TAGLN, APLNR, PLCB3, RAG2, KAT5, GAB2, RRM1, CBL, CD248, B3GNT6, PPP1R14B, HRA…	hsa-mir-210, ACA52, hsa-mir-4298, hsa-mir-675, hsa-mir-483, ACA54, hsa-mir-302e, ACA3, ACA3-2, ACA23, U97, hsa-mir-4299, U14B, U14A, hsa-mir-3159, hsa-mir-610, hsa-mir-670, hsa-mir-129-2, hsa-mir-3160-1, hsa-mir-3160-2, HBII-166, hsa-mir-3161, hsa-mir-130a, hsa-mir-3162, hsa-mir-611, hsa-mir-1908, U99, U22, U31, U30, U29, U28, U27, U26, U25, hsa-mir-1237, hsa-mir-192, hsa-mir-194-2, hsa-mir-612, …	C-4LXKK	C-3KLGX	chr11:230615-133743888
UPN12	Gain	3	12	q24.33	q13.12	737	82507.6	80296	arr[hg19] 12q13.12q24.33(51,270,289-133,777,902)x3	TMPRSS12, METTL7A, HIGD1C, SLC11A2, LETMD1, CSRNP2, TFCP2, POU6F1, DAZAP2, SMAGP, BIN2, CELA1, GALNT6, SLC4A8, SCN8A, FIGNL2, ANKRD33, ACVRL1, ACVR1B, GRASP, NR4A1, C12orf44, KRT80, LOC283403, LINC00592, KRT7, KRT81, KRT86, KRT83, KRT85, KRT84, KRT82, KRT75, KRT6B, KRT6C, KRT6A, KRT5, KRT71, KRT74, KRT72, KRT73, KRT2, KRT1, KRT77, KRT76, KRT3, KRT4, KRT79, KRT78, KRT8, KRT18, EIF4B, LOC283335, TE…	DDIT3, USP15, RAN, HNRNPA1 , P2RX7, GLI1, AGAP2, FBRSL1, PEBP1, KITLG, ELK3, HMGA2, ASCL1, SMARCC2, IL22, BTG1, SLC5A8, DRAM1, IL23A, MDM2, EP400, TSPAN8, ALDH2, RAP1B, DUSP6, PTPN11, CHFR, HOXC13, SH2B3, CDK4, PA2G4, PRKAB1, PXN, PAWR, METAP2, APAF1, HOXC11, TRIAP1, DENR, SARNP, SOCS2, HRK	hsa-mir-196a-2, hsa-mir-615, hsa-mir-148b, U59B, U59A, hsa-mir-1228, hsa-mir-616, hsa-mir-26a-2, hsa-let-7i, hsa-mir-548c, U70G, hsa-mir-1279, hsa-mir-1252, hsa-mir-617, hsa-mir-618, hsa-mir-492, hsa-mir-331, hsa-mir-1251, hsa-mir-135a-2, hsa-mir-4303, ACA53, hsa-mir-1827, hsa-mir-619, hsa-mir-1302-1, hsa-mir-620, hsa-mir-1178, hsa-mir-4304, ACA49	C-6ALWX	C-7PNZW	chr12:51270289-133777902
UPN12	Gain	3	14	q32.33	q11.2	770	86773.8	85690	arr[hg19] 14q11.2q32.33(20,511,672-107,285,437)x3	OR4L1, OR4K17, OR4N5, OR11G2, OR11H6, OR11H4, TTC5, CCNB1IP1, SNORD126, RPPH1, PARP2, TEP1, KLHL33, OSGEP, APEX1, TMEM55B, PNP, RNASE10, RNASE9, RNASE11, RNASE12, OR6S1, ANG, RNASE4, EDDM3A, EDDM3B, RNASE6, RNASE1, RNASE3, ECRP, RNASE2, METTL17, SLC39A2, NDRG2, TPPP2, RNASE13, RNASE7, RNASE8, ARHGEF40, ZNF219, TMEM253, OR5AU1, LINC00641, HNRNPC, RPGRIP1, SUPT16H, CHD8, SNORD9, SNORD8, RAB2B, TOX4…	PAX9, STRN3, NIN, GPHN, PTPN21, MTA1, JAG2, SEL1L, TRA, EML1, NDRG2, SIX1, DPF3, NUMB, VRK1, MMP14, TRAF3, FOXA1, TCL6, PRKD1, NKX2-1, FUT8, IGH@, TRA@, TRD@, TSHR, ANG, XRCC3, ZFP36L1, TCL1B, AKT1, OTX2, TCL1A, DIO2, TRD, GPR68, MEG3, BCL11B, TRIP11, LGALS3, ESR2, SAV1, IGH	hsa-mir-1201, SNORD126, mgU6-53B, mgU6-53, hsa-mir-208a, hsa-mir-208b, hsa-mir-4307, hsa-mir-3171, hsa-mir-624, hsa-mir-3172, SNORD127, hsa-mir-4308, hsa-mir-548h-1, hsa-mir-625, hsa-mir-1260, ACA65, SNORA11B, hsa-mir-3173, U93, hsa-mir-342, hsa-mir-345, hsa-mir-770, hsa-mir-493, hsa-mir-337, hsa-mir-665, hsa-mir-431, hsa-mir-433, hsa-mir-127, hsa-mir-432, hsa-mir-136, 14q(0), hsa-mir-370, 14q(I-…	S-4ETOO	S-3HXYB	chr14:20511672-107285437
UPN12	Gain	2.92	15	q26.3	q11.2	807	79658.7	81561	arr[hg19] 15q11.2q26.3(22,770,421-102,429,112)x2-3	TUBGCP5, CYFIP1, NIPA2, NIPA1, LOC283683, WHAMMP3, GOLGA8I, HERC2P2, HERC2P7, GOLGA8EP, LOC440243, GOLGA8S, MIR4508, MKRN3, MAGEL2, NDN, PWRN2, PWRN1, NPAP1, SNRPN, SNURF, SNORD107, PWARSN, PWAR5, SNORD64, SNORD108, SNORD109A, SNORD109B, SNORD116-1, SNORD116-2, SNORD116-3, SNORD116-9, SNORD116-4, SNORD116-5, SNORD116-7, SNORD116-6, SNORD116-8, SNORD116-10, SNORD116-11, SNORD116-12, SNORD116-13, S…	MAPK6, KIAA0101, TCF12, ITGA11, IDH2, ADAM10, ITPKA, SHC4, BLM, LTK, UBE3A, PML, CTSH, BUB1B, CASC5, IGF1R, SPINT1, NEIL1, THBS1, GOLGA6A, RASGRF1, TYRO3, GCNT3, COPS2, SPRED1, PLCB2, BMF, hsa-mir-626, ATP10A, TRPM1, PKM2, NTRK3, C15orf55	HBII-436, HBII-13, HBII-437, HBII-438A, HBII-85-1, HBII-85-2, HBII-85-3, HBII-85-4, HBII-85-5, HBII-85-6, HBII-85-7, HBII-85-8, HBII-85-9, HBII-85-10, HBII-85-11, HBII-85-12, HBII-85-13, HBII-85-14, HBII-85-15, HBII-85-16, HBII-85-17, HBII-85-18, HBII-85-19, HBII-85-20, HBII-85-21, HBII-85-22, HBII-85-23, HBII-85-24, HBII-85-25, HBII-85-26, HBII-85-27, HBII-85-28, HBII-85-29, HBII-52-1, HBII-52-2…	C-5LBOF	C-4JXEO	chr15:22770421-102429112
UPN12	Gain	3	16	q24.3	p13.3	955	90069.2	72814	arr[hg19] 16p13.3q24.3(85,880-90,155,062)x3	POLR3K, SNRNP25, RHBDF1, MPG, NPRL3, HBZ, HBM, HBA2, HBA1, HBQ1, LUC7L, ITFG3, RGS11, ARHGDIG, PDIA2, AXIN1, MRPL28, TMEM8A, LOC100134368, NME4, DECR2, RAB11FIP3, LINC00235, SOLH, MIR5587, MIR3176, C16orf11, NHLRC4, PIGQ, RAB40C, WFIKKN1, C16orf13, FAM195A, WDR90, RHOT2, RHBDL1, STUB1, JMJD8, WDR24, FBXL16, METRN, FAM173A, CCDC78, HAGHL, NARFL, MSLN, MIR662, RPUSD1, CHTF18, GNG13, PRR25, LMF1, SO…	FBXO31, CENPT, USP7, RANBP10, FUS, CYLD, NQO1, EIF3C, CDT1, ACD, FANCA, CREBBP, IL21R, ZFHX3, CTCF, WFDC1, PHLPP2, ERCC4, SOCS1, ABCC1, TRAP1, NOL3, MYH11, CBFB, RLTPR, MAF, AMFR, GFOD2, CDH1, TSNAXIP1, PLK1, MMP2, PKD1, AXIN1, FAM65A, WWOX, MVP, CDH13, RBL2, MAPK3, CIITA, CBFA2T3, TERF2, TSC2	hsa-mir-3176, hsa-mir-662, hsa-mir-3177, ACA10, U64, ACA64, hsa-mir-1225, U60, hsa-mir-940, hsa-mir-3178, hsa-mir-548h-2, hsa-mir-193b, hsa-mir-365-1, hsa-mir-3179-1, hsa-mir-3180-1, hsa-mir-1972-1, hsa-mir-484, hsa-mir-3179-2, hsa-mir-3180-2, hsa-mir-3180-3, hsa-mir-3179-3, hsa-mir-548w, ACA30, hsa-mir-762, hsa-mir-1826, hsa-mir-3181, hsa-mir-138-2, ACA46, ACA50, hsa-mir-328, hsa-mir-1538, hsa-m…	C-4GBFR	C-7EGZY	chr16:85880-90155062
UPN12	Gain	2.93	17	q25.3	p13.3	1373	81041.4	73347	arr[hg19] 17p13.3q25.3(525-81,041,938)x2-3	DOC2B, RPH3AL, LOC100506388, C17orf97, FAM101B, VPS53, FAM57A, GEMIN4, DBIL5P, GLOD4, RNMTL1, NXN, TIMM22, ABR, MIR3183, BHLHA9, TUSC5, YWHAE, CRK, MYO1C, INPP5K, PITPNA-AS1, PITPNA, SLC43A2, SCARF1, RILP, PRPF8, TLCD2, MIR22HG, MIR22, WDR81, SERPINF2, SERPINF1, SMYD4, RPA1, RTN4RL1, DPH1, OVCA2, MIR132, MIR212, HIC1, SMG6, SRR, TSR1, SNORD91B, SNORD91A, SGSM2, MNT, LOC284009, METTL16, PAFAH1B1, …	ALOX12, MLLT6, HLF, CRLF3, TP53, KSR1, BRCA1, PYY, PPM1D, FAM57A, RABEP1, GSDMA, TAF15, AATF, NF1, BCAS3, SPECC1, PER1, SLC9A3R1, RPL26, USP6, SHBG, PRKAR1A, RNF213, TIMP2, XAF1, IGF2BP1, RAD51D, STARD3, GRB2, HIC1, ELAC2, RAC3, SUZ12P, ERBB2, WRAP53, CASC3, SLC4A1, CLTC, SEPT9, CLDN7, TRIM37, DDX5, AXIN2, SRSF2, ALOX15, MSI2, ASPSCR1, MIR21, GAS7, NCOR1, ETV4, IKZF3, CDC6, KDM6B, RARA, TRPV1, LA…	hsa-mir-3183, hsa-mir-22, hsa-mir-132, hsa-mir-212, HBII-296B, HBII-296A, hsa-mir-1253, hsa-mir-195, hsa-mir-497, hsa-mir-324, ACA48, mgU6-77, U67, ACA68, hsa-mir-4314, U8, hsa-mir-744, hsa-mir-548h-3, hsa-mir-1288, U49B, U49A, HBII-135, hsa-mir-33b, U3-2, U3-2B, U3-4, U3, U3-3, hsa-mir-1180, ACA59B, U42B, mgh18S-121, U42A, Z17B, hsa-mir-451, hsa-mir-144, hsa-mir-423, hsa-mir-3184, hsa-mir-193a, …	C-5VAZU	S-4LRWR	chr17:525-81041938
UPN12	Gain	3	18	q23	p11.32	342	77877.9	66936	arr[hg19] 18p11.32q23(136,226-78,014,123)x3	USP14, THOC1, COLEC12, CETN1, CLUL1, C18orf56, TYMS, ENOSF1, YES1, ADCYAP1, LINC00470, METTL4, NDC80, CBX3P2, SMCHD1, EMILIN2, LPIN2, LOC727896, MYOM1, MYL12A, MYL12B, TGIF1, DLGAP1, DLGAP1-AS1, DLGAP1-AS3, DLGAP1-AS4, DLGAP1-AS5, C18orf42, LINC00526, LINC00667, ZBTB14, EPB41L3, LOC645355, MIR3976, TMEM200C, L3MBTL4, MIR4317, LOC100130480, ARHGAP28, LINC00668, LAMA1, LRRC30, PTPRM, LOC100192426, …	SS18, MBD2, MALT1, DSG2, GATA6, PHLPP1, DCC, PTPN2, MAPK4, SMAD4, SLC39A6, BCL2, SETBP1, SMAD2, EPB41L3, RBBP8, SERPINB5, ZNF521	hsa-mir-4317, hsa-mir-3156-2, hsa-mir-320c-1, hsa-mir-133a-1, hsa-mir-1-2, hsa-mir-320c-2, hsa-mir-302f, hsa-mir-187, hsa-mir-4318, hsa-mir-924, hsa-mir-4319, hsa-mir-1539, U58C, U58A, U58B, mgU12-22/U4-8, U91, hsa-mir-4320, ACA37, hsa-mir-122	C-7KBTZ	C-6HGFA	chr18:136226-78014123
UPN12	Gain	4	21	q22.3	q11.2	293	33090.9	33620	arr[hg19] 21q11.2q22.3(15,006,457-48,097,372)x4	POTED, C21orf15, ANKRD20A11P, LIPI, RBM11, ABCC13, HSPA13, SAMSN1, SAMSN1-AS1, LOC388813, NRIP1, USP25, LINC00478, MIR99A, MIRLET7C, MIR125B2, C21orf37, CXADR, BTG3, C21orf91-OT1, C21orf91, CHODL-AS1, CHODL, TMPRSS15, LINC00320, NCAM2, RNU6-67P, LINC00317, LINC00308, D21S2088E, LOC339622, LINC00158, MIR155HG, MIR155, LINC00515, MRPL39, JAM2, ATP5J, GABPA, APP, CYYR1, ADAMTS1, ADAMTS5, MIR4759, MI…	U2AF1, PTTG1IP, TIAM1, MIR125B2, OLIG2, CSTB, ADAMTS1, NRIP1, TFF3, TFF2, TMPRSS3, ERG, ETS2, DYRK1A, TFF1, TMPRSS2, RUNX1, S100B	hsa-mir-3118-5, hsa-mir-99a, hsa-let-7c, hsa-mir-125b-2, hsa-mir-548x, hsa-mir-155, hsa-mir-4327, ACA67, hsa-mir-802, hsa-mir-3197	C-6OPRF	C-3ELOA	chr21:15006457-48097372
UPN12	Gain	3	X	p22.33	p22.33	22	2576.45	4187	arr[hg19] Xp22.33(168,546-2,745,000)x3	PLCXD1, GTPBP6, LINC00685, PPP2R3B, SHOX, CRLF2, CSF2RA, MIR3690, IL3RA, SLC25A6, ASMTL-AS1, ASMTL, P2RY8, AKAP17A, ASMT, DHRSX, ZBED1, CD99P1, LINC00102, CD99, XG, XGPY2	IL3RA, P2RY8, CRLF2		C-5QGHR	C-4RAWB	chrX:168546-2745000
UPN12	Gain	2	X	q28	p22.33	995	152192	185124	arr[hg19] Xp22.33q28(2,751,605-154,943,979)x2	GYG2, ARSD, ARSE, ARSH, ARSF, CXorf28, MXRA5, PRKX, LOC389906, NLGN4X, MIR4770, VCX3A, HDHD1, MIR4767, STS, VCX, PNPLA4, MIR651, VCX2, VCX3B, KAL1, FAM9A, FAM9B, TBL1X, GPR143, SHROOM2, LOC100288814, WWC3, CLCN4, MID1, HCCS, ARHGAP6, AMELX, MSL3, FRMPD4, PRPS2, TLR7, TLR8-AS1, TLR8, TMSB4X, FAM9C, LOC100093698, ATXN3L, LOC100133123, EGFL6, TCEANC, RAB9A, TRAPPC2, OFD1, GPM6B, GEMIN8, GLRA2, FANCB…	PHF6, RPL10, GATA1, GPC3, DKC1, DACH2, MIR221, L1CAM, STAG2, ARMCX1, CXCR3, MTCP1, SEPT6, FOXP3, FAM123B, NONO, RBBP7, RHOXF2, ZRSR2, ARMCX3, MSN, AIFM1, ARMCX2, KDM6A, ELF4, REPS2, Sep.06, SSX2, BRWD3, ZBTB33, TFE3, MIR222, AR, BTK, AMOT, BCOR, FOXO4, SPANXA1	hsa-mir-651, hsa-mir-1308, ACA12, hsa-mir-548f-5, hsa-mir-221, hsa-mir-222, SNORA11C, hsa-mir-532, hsa-mir-188, hsa-mir-500, hsa-mir-362, hsa-mir-501, hsa-mir-500b, hsa-mir-660, hsa-mir-502, SNORA11E, SNORA11D, hsa-mir-98, hsa-let-7f-2, U107, hsa-mir-1468, hsa-mir-223, hsa-mir-421, hsa-mir-374b, hsa-mir-545, hsa-mir-374a, hsa-mir-384, hsa-mir-325, hsa-mir-4328, hsa-mir-548i-4, hsa-mir-1321, hsa-m…	C-5ATGU	C-3STKB	chrX:2751605-154943979
UPN12	Gain	3	X	q28	q28	3	286.844	507	arr[hg19] Xq28 or Yq12(154,946,887-155,233,731 or 59,049,893-59,336,737)x3	SPRY3, VAMP7, IL9R			C-3RUGX	C-6KTXX	chrX:154946887-155233731
UPN12	Gain	3	19	p13.3	p13.3	4	68.752	36	arr[hg19] 19p13.3(633,754-702,506)x3	FGF22, RNF126, FSTL3, PRSS57	FSTL3		C-5EQVJ	C-6PKYW	chr19:633754-702506
UPN13	LOH		8	q13.2	q12.3	33	3991.61	791	arr[hg19] 8q12.3q13.2(64,207,362-68,198,975) hmz	LOC286184, LINC00966, MIR124-2, LOC401463, BHLHE22, CYP7B1, LINC00251, LOC286186, ARMC1, MTFR1, PDE7A, DNAJC5B, TRIM55, CRH, LINC00967, LOC100505676, RRS1, ADHFE1, C8orf46, MYBL1, VCPIP1, C8orf44, C8orf44-SGK3, SGK3, PTTG3P, MCMDC2, SNHG6, SNORD87, TCF24, PPP1R42, COPS5, CSPP1, ARFGEF1	MYBL1, CYP7B1	hsa-mir-124-2, HBII-276	S-3IYEQ	S-3YSBY	chr8:64207362-68198975
UPN13	LOH		15	q26.3	q11.2	807	79676.7	24981	arr[hg19] 15q11.2q26.3(22,752,398-102,429,049) hmz	TUBGCP5, CYFIP1, NIPA2, NIPA1, LOC283683, WHAMMP3, GOLGA8I, HERC2P2, HERC2P7, GOLGA8EP, LOC440243, GOLGA8S, MIR4508, MKRN3, MAGEL2, NDN, PWRN2, PWRN1, NPAP1, SNRPN, SNURF, SNORD107, PWARSN, PWAR5, SNORD64, SNORD108, SNORD109A, SNORD109B, SNORD116-1, SNORD116-2, SNORD116-3, SNORD116-9, SNORD116-4, SNORD116-5, SNORD116-7, SNORD116-6, SNORD116-8, SNORD116-10, SNORD116-11, SNORD116-12, SNORD116-13, S…	MAPK6, KIAA0101, TCF12, ITGA11, IDH2, ADAM10, ITPKA, SHC4, BLM, LTK, UBE3A, PML, CTSH, BUB1B, CASC5, IGF1R, SPINT1, NEIL1, THBS1, GOLGA6A, RASGRF1, TYRO3, GCNT3, COPS2, SPRED1, PLCB2, BMF, hsa-mir-626, ATP10A, TRPM1, PKM2, NTRK3, C15orf55	HBII-436, HBII-13, HBII-437, HBII-438A, HBII-85-1, HBII-85-2, HBII-85-3, HBII-85-4, HBII-85-5, HBII-85-6, HBII-85-7, HBII-85-8, HBII-85-9, HBII-85-10, HBII-85-11, HBII-85-12, HBII-85-13, HBII-85-14, HBII-85-15, HBII-85-16, HBII-85-17, HBII-85-18, HBII-85-19, HBII-85-20, HBII-85-21, HBII-85-22, HBII-85-23, HBII-85-24, HBII-85-25, HBII-85-26, HBII-85-27, HBII-85-28, HBII-85-29, HBII-52-1, HBII-52-2…	S-4FEVG	S-3ERSU	chr15:22752398-102429049
UPN13	LOH		X	q28	q28	91	3193.11	356	arr[hg19] Xq28(152,040,731-155,233,846) hmz	ZNF185, PNMA5, PNMA3, PNMA6D, PNMA6C, PNMA6A, MAGEA1, ZNF275, ZFP92, TREX2, HAUS7, BGN, ATP2B3, FAM58A, DUSP9, PNCK, SLC6A8, BCAP31, ABCD1, PLXNB3, SRPK3, IDH3G, SSR4, PDZD4, L1CAM, AVPR2, ARHGAP4, NAA10, RENBP, HCFC1, TMEM187, MIR3202-1, MIR3202-2, IRAK1, MIR718, MECP2, OPN1LW, OPN1MW2, OPN1MW, TEX28, TKTL1, FLNA, EMD, RPL10, SNORA70, DNASE1L1, TAZ, ATP6AP1, GDI1, FAM50A, PLXNA3, LAGE3, UBL4A, S…	RPL10, DKC1, L1CAM, MTCP1	hsa-mir-3202-1, hsa-mir-3202-2, hsa-mir-718, U70, ACA36, ACA56, hsa-mir-1184-1, hsa-mir-1184-2, hsa-mir-1184-3	S-3SKUT	S-3PQTJ	chrX:152040731-155233846
UPN13	Loss	0	9	p21.3	p21.3	4	103.121	144	arr[hg19] 9p21.3(21,902,071-22,005,192)x0	C9orf53, CDKN2A, CDKN2B-AS1, CDKN2B	CDKN2A, CDKN2B		C-5WMJZ	C-7AFRA	chr9:21902071-22005192
UPN13	Loss	1	9	p21.3	p21.3	4	1563.82	999	arr[hg19] 9p21.3(22,005,303-23,569,119)x1	CDKN2B-AS1, CDKN2B, DMRTA1, FLJ35282	CDKN2B		C-3QVUJ	S-4NEVN	chr9:22005303-23569119
UPN13	Loss	1	9	p13.2	p13.2	1	32.138	72	arr[hg19] 9p13.2(36,988,850-37,020,988)x1	PAX5	PAX5		S-3XRJH	C-3NGWX	chr9:36988850-37020988
UPN13	Gain	3	2	q37.3	p25.3	1494	242771	206547	arr[hg19] 2p25.3q37.3(12,770-242,783,384)x3	FAM110C, SH3YL1, ACP1, FAM150B, TMEM18, LOC339822, SNTG2, TPO, PXDN, MYT1L, LOC730811, TSSC1, TRAPPC12, ADI1, RNASEH1, LOC100506054, RPS7, COLEC11, ALLC, LOC100505964, LOC727982, SOX11, LOC150622, LOC400940, LINC00487, CMPK2, RSAD2, RNF144A-AS1, RNF144A, LOC100506274, LOC339788, LINC00299, ID2, KIDINS220, MBOAT2, ASAP2, ITGB1BP1, CPSF3, IAH1, ADAM17, YWHAQ, TAF1B, GRHL1, KLF11, CYS1, RRM2, C2orf4…	ERCC3, ZEB2, MIR10B, CAPG, ALK, DIRC3, RTN4, SDC1, MSH6, BIRC6, PMS1, THADA, HOXD13, FHL2, BRE, BUB1, ATF2, LOXL3, PAX8, PTMA, EML4, BCL11A, FBXO11, KCMF1, SF3B1, CFLAR, BOK, EPCAM, DIRC1, MTA3, XPO1, RANBP2, CXCR7, NLRC4, PDE11A, MYCN, ATIC, ACVR2A, MAL, TGFBRAP1, STRN, LHCGR, INPP5D, IL1B, TTL, ADAM17, IGK, SEPT2, MAP2, TMSB10, DDX1, ADAM23, HOXD11, BARD1, SOX11, IKZF2, PAX3, REL, DNMT3A, HSPD1…	hsa-mir-4261, ACA67B, hsa-mir-548s, hsa-mir-4262, hsa-mir-3125, hsa-mir-1301, hsa-mir-4263, HBII-316, U53, hsa-mir-558, hsa-mir-559, hsa-mir-217, hsa-mir-216a, hsa-mir-216b, U70B, hsa-mir-3126, SNORA36C, hsa-mir-1285-2, hsa-mir-4264, U94, hsa-mir-3127, HBII-289, hsa-mir-4265, hsa-mir-4266, hsa-mir-4267, hsa-mir-1302-3, hsa-mir-663b, hsa-mir-128-1, U70F, hsa-mir-933, hsa-mir-10b, hsa-mir-1246, hsa…		C-4FPKL	chr2:12770-242783384
UPN13	Gain	3	3	q29	p26.3	1279	197790	178050	arr[hg19] 3p26.3q29(61,891-197,851,986)x3	CHL1, CNTN6, CNTN4, CNTN4-AS2, IL5RA, TRNT1, CRBN, LRRN1, SETMAR, SUMF1, ITPR1, EGOT, BHLHE40-AS1, BHLHE40, ARL8B, EDEM1, MIR4790, GRM7, LMCD1-AS1, LMCD1, LINC00312, SSUH2, CAV3, OXTR, RAD18, SRGAP3, SRGAP3-AS3, THUMPD3, SETD5-AS1, SETD5, LHFPL4, MTMR14, CPNE9, BRPF1, OGG1, CAMK1, TADA3, ARPC4, ARPC4-TTLL3, TTLL3, RPUSD3, CIDEC, JAGN1, IL17RE, IL17RC, CRELD1, PRRT3, PRRT3-AS1, EMC3, LOC401052, CI…	CSTA, RNF7, PIK3CA, SEMA3B, ATR, MLF1, CISH, FAM107A, GSK3B, FAIM, SATB1, LIMD1, SEMA3F, XPC, PTPRG, TNFSF10, DIRC2, MME, BTLA, RPN1, KIAA1524, ARL8B, HSPBAP1, TBL1XR1, PPARG, WNT5A, FHIT, EDEM1, RASSF1, PLD1, BCL6, CDC25A, FANCD2, PLCD1, MUC4, MBD4, RAP2B, TCTA, MST1R, PRKCD, MAP4, PLXNB1, RUVBL1, EIF4A2, VHL, MLH1, LRIG1, GHRL, NCKIPSD, SMARCC1, RARRES1, TFRC, BAP1, MUC13, HYAL1, CD200, GMPS, C…	hsa-mir-378b, hsa-mir-885, ACA7, hsa-mir-4270, hsa-mir-3134, hsa-mir-563, hsa-mir-3135, hsa-mir-466, hsa-mir-128-2, hsa-mir-26a-1, ACA6, E2, hsa-mir-138-1, hsa-mir-564, hsa-mir-1226, hsa-mir-2115, hsa-mir-711, hsa-mir-425, hsa-mir-191, hsa-mir-4271, hsa-mir-566, hsa-let-7g, hsa-mir-135a-1, HBII-108, HBII-108B, HBII-210, hsa-mir-4272, hsa-mir-3136, hsa-mir-1284, hsa-mir-1324, hsa-mir-4273, hsa-mir…	C-4GDNQ	C-4SLRH	chr3:61891-197851986
UPN13	Gain	2.9	4	q35.2	p16.3	891	190889	153163	arr[hg19] 4p16.3q35.2(68,345-190,957,473)x2-3	ZNF595, ZNF718, ZNF876P, ZNF732, ZNF141, ABCA11P, ZNF721, PIGG, PDE6B, ATP5I, MYL5, MFSD7, PCGF3, LOC100129917, CPLX1, GAK, TMEM175, DGKQ, SLC26A1, IDUA, FGFRL1, RNF212, TMED11P, SPON2, LOC100130872, CTBP1, CTBP1-AS2, MAEA, UVSSA, CRIPAK, FAM53A, SLBP, TMEM129, TACC3, FGFR3, LETM1, WHSC1, SCARNA22, NELFA, MIR943, C4orf48, NAT8L, POLN, HAUS3, MXD4, MIR4800, ZFYVE28, LOC402160, RNF4, FAM193A, TNIP2…	S100P, RCHY1, FGF2, FGFR3, FIP1L1, RASSF6, CHIC2, SYNPO2, FRYL, REST, TET2, MAD2L1, NR3C2, NUDT6, FAT1, KIT, WHSC1, AFF1, NFKB1, ING2, RAP1GDS1, EIF4E, AREG, LEF1, FBXW7, SORBS2, PDGFRA, TACC3, HNRNPD, NPY1R, RASL11B, RHOH, PTPN13, MAPK10, SPP1	hsa-mir-571, ACA11, hsa-mir-943, hsa-mir-4274, hsa-mir-95, hsa-mir-548i-2, hsa-mir-3138, hsa-mir-572, hsa-mir-218-1, hsa-mir-573, hsa-mir-4275, hsa-mir-1255b-1, hsa-mir-574, HBI-6, hsa-mir-1269, hsa-mir-575, hsa-mir-1255a, hsa-mir-576, hsa-mir-297, hsa-mir-367, hsa-mir-302d, hsa-mir-302a, hsa-mir-302c, hsa-mir-302b, hsa-mir-1243, hsa-mir-577, hsa-mir-1973, ACA24, hsa-mir-2054, hsa-mir-3139, hsa-m…	C-4FYJV	C-7HDOD	chr4:68345-190957473
UPN13	Gain	2.93	5	q35.3	p15.33	1035	180606	153797	arr[hg19] 5p15.33q35.3(113,576-180,719,789)x2-3	PLEKHG4B, LRRC14B, CCDC127, SDHA, PDCD6, AHRR, C5orf55, EXOC3, PP7080, SLC9A3, MIR4456, LOC100996325, CEP72, TPPP, ZDHHC11, BRD9, TRIP13, LOC100506688, NKD2, SLC12A7, MIR4635, SLC6A19, SLC6A18, TERT, MIR4457, CLPTM1L, SLC6A3, LPCAT1, SDHAP3, LOC728613, MIR4277, MRPL36, NDUFS6, IRX4, IRX2, C5orf38, LOC285577, IRX1, LOC340094, ADAMTS16, KIAA0947, FLJ33360, MED10, UBE2QL1, LOC255167, NSUN2, SRD5A1, …	SPINK7, SEPP1, TGFBI, PDGFRB, EGR1, EBF1, HDAC3, MSH3, ACSL6, DAB2, IQGAP2, TLX3, PTTG1, LOX, SNX2, IL3, MAPK9, APC, LIFR, NPM1, GNB2L1, CCNB1, NKX2-5, FST, NR3C1, CSF1R, IL7R, RANBP17, TSLP, IRF1, AFF4, FNIP1, SSBP2, ERCC8, MEF2C, PDCD6, VCAN, CSNK1A1, GZMA, TRIO, TNIP1, NSD1, ARHGAP26, ENC1, ITK, PRLR	hsa-mir-4277, hsa-mir-4278, SNORD123, hsa-mir-887, hsa-mir-4279, hsa-mir-579, hsa-mir-580, HBII-240, hsa-mir-1274a, hsa-mir-581, hsa-mir-449a, hsa-mir-449b, hsa-mir-449c, hsa-mir-582, HBI-115, U109, hsa-mir-4280, hsa-mir-9-2, hsa-mir-2277, hsa-mir-583, hsa-mir-548p, hsa-mir-548f-3, ACA13, hsa-mir-1244-2, hsa-mir-1289-2, hsa-mir-886, hsa-mir-874, U63, U19, hsa-mir-584, hsa-mir-143, hsa-mir-145, hs…	S-3RLNJ	C-6SEKW	chr5:113576-180719789
UPN13	Gain	2.91	6	q27	p25.3	1220	170763	155053	arr[hg19] 6p25.3q27(156,974-170,919,482)x2-3	DUSP22, IRF4, EXOC2, HUS1B, LOC285768, FOXQ1, FOXF2, FOXC1, GMDS, LOC100508120, C6orf195, MYLK4, WRNIP1, SERPINB1, MIR4645, MGC39372, SERPINB9, SERPINB6, DKFZP686I15217, NQO2, HTATSF1P2, RIPK1, BPHL, TUBB2A, LOC100507194, TUBB2B, PSMG4, SLC22A23, PXDC1, FAM50B, PRPF4B, FAM217A, C6orf201, ECI2, CDYL, RPP40, PPP1R3G, LYRM4, MIR3691, FARS2, NRN1, F13A1, LY86-AS1, LY86, RREB1, SSR1, CAGE1, RIOK1, DSP…	CD109, CEP85L, PPARD, CTGF, MLLT4, IGF2R, DAXX, CCND3, AHI1, BCLAF1, FOXO3, SOX4, ID4, LIN28B, CCNC, PLAGL1, FGFR1OP, SESN1, IRF4, TFAP2A, TNFAIP3, IER3, DEK, DDR1, CDKN1A, FANCE, LATS1, PRDM1, THBS2, DDX43, CITED2, BAK1, MYB, JARID2, CASP8AP2 , POLH, HIST1H2BH, WISP3, IL17A, HIST1H3F, HMGA1, EEF1A1, HFE, RUNX2, MAPK13, TFEB, ZFAND3, EPHA7, CAGE1, RNF217-AS1, hsa-mir-548a-2, AKAP12, AGER, MAP3K7,…	hsa-mir-548a-1, hsa-mir-3143, U32B, hsa-mir-877, U83, U84, ACA38, U48, U52, hsa-mir-1236, hsa-mir-219-1, hsa-mir-1275, hsa-mir-586, hsa-mir-206, hsa-mir-133b, hsa-mir-548u, hsa-mir-30c-2, hsa-mir-30a, hsa-mir-4282, U50, U50B, hsa-mir-2113, hsa-mir-587, hsa-mir-548b, hsa-mir-3144, hsa-mir-588, U101, HBII-429, ACA33, hsa-mir-548a-2, hsa-mir-3145, hsa-mir-1273c, hsa-mir-1202, ACA20, ACA29, hsa-mir-1…	C-3GOBV	C-5ELRJ	chr6:156974-170919482
UPN13	Gain	3	8	q24.3	p23.3	837	146138	125254	arr[hg19] 8p23.3q24.3(158,048-146,295,771)x3	RPL23AP53, ZNF596, FAM87A, FBXO25, TDRP, ERICH1, ERICH1-AS1, LOC286083, DLGAP2, CLN8, MIR596, ARHGEF10, KBTBD11, MYOM2, CSMD1, LOC100287015, MCPH1, ANGPT2, AGPAT5, MIR4659A, MIR4659B, XKR5, LOC100652791, DEFB1, DEFA6, DEFA4, DEFA8P, DEFA9P, DEFA10P, DEFA1, DEFA1B, DEFT1P, DEFT1P2, DEFA3, DEFA11P, DEFA5, LINC00965, FAM66B, DEFB109P1B, USP17L1P, USP17L4, ZNF705G, DEFB4B, DEFB103B, DEFB103A, SPAG11B…	PTK2, COX6C, DEFB1, MTUS1, ASH2L, NBN, RUNX1T1, ADAM9, NDRG1, TPD52, EIF4EBP1, PSCA, TP53INP1, TNFRSF11B, BOP1, LOXL2, FGFR1, MAFA, SNAI2, NCOA2, MYC, PTK2B, WRN, WHSC1L1, HAS2, RNF139, PCM1, IDO2, NAT2, PLAG1, TACC1, PAG1, NKX3-1, ENPP2, MCPH1, TOX, MYBL1, DLC1, IDO1, KAT6A, CTHRC1, EBAG9, RECQL4, CTSB, CYP7A1, NAT1, EXT1, CYP7B1, TNKS, KIAA1967, CLU, RHOBTB2, BAALC, GGH, WWP1, RAD21	hsa-mir-596, hsa-mir-548i-3, hsa-mir-597, hsa-mir-124-1, hsa-mir-4286, hsa-mir-1322, hsa-mir-598, hsa-mir-383, hsa-mir-548v, hsa-mir-320a, hsa-mir-548h-4, hsa-mir-4287, hsa-mir-4288, hsa-mir-3148, U13, hsa-mir-486, U54, hsa-mir-124-2, HBII-276, hsa-mir-2052, hsa-mir-3149, hsa-mir-3150, U72, hsa-mir-599, hsa-mir-875, hsa-mir-1273, hsa-mir-3151, hsa-mir-548a-3, hsa-mir-2053, hsa-mir-548d-1, hsa-mir…	C-5YVTF	C-3WEHE	chr8:158048-146295771
UPN13	Gain	3	10	q26.3	p15.3	921	135285	133193	arr[hg19] 10p15.3q26.3(142,391-135,427,143)x3	ZMYND11, DIP2C, MIR5699, PRR26, LARP4B, GTPBP4, IDI2, IDI2-AS1, IDI1, WDR37, LINC00200, ADARB2, ADARB2-AS1, LINC00700, LINC00701, PFKP, PITRM1, PITRM1-AS1, KLF6, LINC00704, LINC00705, AKR1E2, AKR1C6P, AKR1C1, AKR1C2, AKR1C3, AKR1CL1, AKR1C4, UCN3, TUBAL3, NET1, CALML5, CALML3, ASB13, FAM208B, GDI2, ANKRD16, FBXO18, IL15RA, IL2RA, RBM17, PFKFB3, MIR3155A, MIR3155B, LOC399715, PRKCQ, PRKCQ-AS1, LIN…	GATA3, SIRT1, MLLT10, FGFR2, DMBT1, KLF6, BNIP3, NT5C2, LGI1, ZMIZ1, HTRA1, TLX1, ADAM12, AKR1C3, KAT6B, ERCC6, NCOA4, AIFM2, ALOX5, PDCD4, DKK1, FGF8, LDB1, BMI1, PTEN, ARID5B, NET1, BLNK, BTRC, ADD3, LOXL4, SNCG, NFKB2, TET1, EIF3A, BAG3, PSAP, MXI1, PAX2, MRC1, RHOBTB1, MAPK8, CCDC6, ABI1, RET	hsa-mir-3155, hsa-mir-548q, hsa-mir-4293, hsa-mir-1265, hsa-mir-511-1, hsa-mir-511-2, hsa-mir-1915, hsa-mir-603, hsa-mir-604, hsa-mir-938, hsa-mir-3156-1, hsa-mir-4294, hsa-mir-605, hsa-mir-548f-1, hsa-mir-1296, HBII-419, hsa-mir-1254, hsa-mir-606, hsa-mir-346, hsa-mir-107, hsa-mir-3157, hsa-mir-607, hsa-mir-1287, U108, hsa-mir-608, hsa-mir-3158-2, hsa-mir-3158-1, hsa-mir-146b, hsa-mir-1307, hsa-…	C-6UPKW	C-5DPFD	chr10:142391-135427143
UPN13	Gain	2.92	11	q25	p15.5	1459	134708	136510	arr[hg19] 11p15.5q25(230,615-134,938,470)x2-3	SIRT3, PSMD13, NLRP6, ATHL1, IFITM5, IFITM2, IFITM1, IFITM3, B4GALNT4, PKP3, SIGIRR, ANO9, PTDSS2, RNH1, HRAS, LRRC56, C11orf35, RASSF7, MIR210HG, MIR210, LOC143666, PHRF1, IRF7, CDHR5, SCT, DRD4, DEAF1, TMEM80, EPS8L2, TALDO1, PDDC1, NS3BP, CEND1, SLC25A22, PIDD, RPLP2, SNORA52, PNPLA2, EFCAB4A, CD151, POLR2L, TSPAN4, CHID1, AP2A2, MUC6, MUC2, MUC5B, TOLLIP, TOLLIP-AS1, BRSK2, MOB2, DUSP8, KRTAP…	ARHGAP20, PTPRJ, ATM, MRE11A, CASP1, ZBTB16, FANCF, SPI1, OPCML, MUC6, KIAA1549L (C11orf41), KMT2A, CLP1, MUC2, VEGFB, LMO2, PAX6, MIR125B1, SPA17, DNAJC4, NUDT22, MLL, RAG1, DDB2, FKBP2, H2AFX, FAU, INPPL1, C11orf30, RELA, BIRC2, ORAOV1, MYEOV, CD82, NPAT, PAK1, FEN1, STIP1, CST6, RAD9A, DDX10, EIF3F, HTATIP2, PICALM, TAGLN, APLNR, PLCB3, RAG2, KAT5, GAB2, RRM1, CBL, CD248, B3GNT6, PPP1R14B, HRA…	hsa-mir-210, ACA52, hsa-mir-4298, hsa-mir-675, hsa-mir-483, ACA54, hsa-mir-302e, ACA3, ACA3-2, ACA23, U97, hsa-mir-4299, U14B, U14A, hsa-mir-3159, hsa-mir-610, hsa-mir-670, hsa-mir-129-2, hsa-mir-3160-1, hsa-mir-3160-2, HBII-166, hsa-mir-3161, hsa-mir-130a, hsa-mir-3162, hsa-mir-611, hsa-mir-1908, U99, U22, U31, U30, U29, U28, U27, U26, U25, hsa-mir-1237, hsa-mir-192, hsa-mir-194-2, hsa-mir-612, …	C-4LXKK	S-3EDHX	chr11:230615-134938470
UPN13	Gain	2.9	12	q24.33	p13.33	1184	133604	129778	arr[hg19] 12p13.33q24.33(173,786-133,777,902)x2-3	IQSEC3, LOC574538, SLC6A12, SLC6A13, KDM5A, CCDC77, B4GALNT3, NINJ2, WNK1, RAD52, ERC1, LINC00942, FBXL14, WNT5B, MIR3649, ADIPOR2, CACNA2D4, LRTM2, LINC00940, DCP1B, CACNA1C, CACNA1C-AS4, CACNA1C-IT3, CACNA1C-AS1, LOC283440, FKBP4, ITFG2, NRIP2, LOC100507424, FOXM1, RHNO1, TULP3, TEAD4, TSPAN9, PRMT8, EFCAB4B, PARP11, CCND2, C12orf5, FGF23, FGF6, C12orf4, RAD51AP1, DYRK4, AKAP3, NDUFA9, GALNT8, …	DDIT3, USP15, RAN, HNRNPA1 , P2RX7, ATF7IP, PTHLH, GLI1, AGAP2, FBRSL1, PEBP1, KITLG, ELK3, GUCY2C, HMGA2, ASCL1, SMARCC2, IL22, CCND2, ATF1, BTG1, KDM5A, SLC5A8, VWF, DRAM1, SOX5, PPFIBP1, GABARAPL1, IL23A, FOXM1, MDM2, KLRK1, BCL2L14, MIR200C, EP400, TSPAN8, ALDH2, ETNK1, RAP1B, CDKN1B, DUSP6, PTPN11, CHFR, ERC1, HOXC13, EPS8, CD9, SH2B3, CDK4, ETV6, PA2G4, PRKAB1, PXN, PAWR, ING4, METAP2, APAF…	U85, ACA57, hsa-mir-200c, hsa-mir-141, U89, hsa-mir-1244-3, hsa-mir-613, hsa-mir-614, hsa-mir-920, hsa-mir-4302, ACA34, hsa-mir-1291, ACA2a, ACA2b, hsa-mir-1293, hsa-mir-196a-2, hsa-mir-615, hsa-mir-148b, U59B, U59A, hsa-mir-1228, hsa-mir-616, hsa-mir-26a-2, hsa-let-7i, hsa-mir-548c, U70G, hsa-mir-1279, hsa-mir-1252, hsa-mir-617, hsa-mir-618, hsa-mir-492, hsa-mir-331, hsa-mir-1251, hsa-mir-135a-2…	C-3JQGZ	C-7PNZW	chr12:173786-133777902
UPN13	Gain	2.86	14	q32.33	q11.2	770	86773.8	85690	arr[hg19] 14q11.2q32.33(20,511,672-107,285,437)x2-3	OR4L1, OR4K17, OR4N5, OR11G2, OR11H6, OR11H4, TTC5, CCNB1IP1, SNORD126, RPPH1, PARP2, TEP1, KLHL33, OSGEP, APEX1, TMEM55B, PNP, RNASE10, RNASE9, RNASE11, RNASE12, OR6S1, ANG, RNASE4, EDDM3A, EDDM3B, RNASE6, RNASE1, RNASE3, ECRP, RNASE2, METTL17, SLC39A2, NDRG2, TPPP2, RNASE13, RNASE7, RNASE8, ARHGEF40, ZNF219, TMEM253, OR5AU1, LINC00641, HNRNPC, RPGRIP1, SUPT16H, CHD8, SNORD9, SNORD8, RAB2B, TOX4…	PAX9, STRN3, NIN, GPHN, PTPN21, MTA1, JAG2, SEL1L, TRA, EML1, NDRG2, SIX1, DPF3, NUMB, VRK1, MMP14, TRAF3, FOXA1, TCL6, PRKD1, NKX2-1, FUT8, IGH@, TRA@, TRD@, TSHR, ANG, XRCC3, ZFP36L1, TCL1B, AKT1, OTX2, TCL1A, DIO2, TRD, GPR68, MEG3, BCL11B, TRIP11, LGALS3, ESR2, SAV1, IGH	hsa-mir-1201, SNORD126, mgU6-53B, mgU6-53, hsa-mir-208a, hsa-mir-208b, hsa-mir-4307, hsa-mir-3171, hsa-mir-624, hsa-mir-3172, SNORD127, hsa-mir-4308, hsa-mir-548h-1, hsa-mir-625, hsa-mir-1260, ACA65, SNORA11B, hsa-mir-3173, U93, hsa-mir-342, hsa-mir-345, hsa-mir-770, hsa-mir-493, hsa-mir-337, hsa-mir-665, hsa-mir-431, hsa-mir-433, hsa-mir-127, hsa-mir-432, hsa-mir-136, 14q(0), hsa-mir-370, 14q(I-…	S-4ETOO	S-3HXYB	chr14:20511672-107285437
UPN13	Gain	3	16	q24.3	p13.3	955	90069.2	72814	arr[hg19] 16p13.3q24.3(85,880-90,155,062)x3	POLR3K, SNRNP25, RHBDF1, MPG, NPRL3, HBZ, HBM, HBA2, HBA1, HBQ1, LUC7L, ITFG3, RGS11, ARHGDIG, PDIA2, AXIN1, MRPL28, TMEM8A, LOC100134368, NME4, DECR2, RAB11FIP3, LINC00235, SOLH, MIR5587, MIR3176, C16orf11, NHLRC4, PIGQ, RAB40C, WFIKKN1, C16orf13, FAM195A, WDR90, RHOT2, RHBDL1, STUB1, JMJD8, WDR24, FBXL16, METRN, FAM173A, CCDC78, HAGHL, NARFL, MSLN, MIR662, RPUSD1, CHTF18, GNG13, PRR25, LMF1, SO…	FBXO31, CENPT, USP7, RANBP10, FUS, CYLD, NQO1, EIF3C, CDT1, ACD, FANCA, CREBBP, IL21R, ZFHX3, CTCF, WFDC1, PHLPP2, ERCC4, SOCS1, ABCC1, TRAP1, NOL3, MYH11, CBFB, RLTPR, MAF, AMFR, GFOD2, CDH1, TSNAXIP1, PLK1, MMP2, PKD1, AXIN1, FAM65A, WWOX, MVP, CDH13, RBL2, MAPK3, CIITA, CBFA2T3, TERF2, TSC2	hsa-mir-3176, hsa-mir-662, hsa-mir-3177, ACA10, U64, ACA64, hsa-mir-1225, U60, hsa-mir-940, hsa-mir-3178, hsa-mir-548h-2, hsa-mir-193b, hsa-mir-365-1, hsa-mir-3179-1, hsa-mir-3180-1, hsa-mir-1972-1, hsa-mir-484, hsa-mir-3179-2, hsa-mir-3180-2, hsa-mir-3180-3, hsa-mir-3179-3, hsa-mir-548w, ACA30, hsa-mir-762, hsa-mir-1826, hsa-mir-3181, hsa-mir-138-2, ACA46, ACA50, hsa-mir-328, hsa-mir-1538, hsa-m…	C-4GBFR	C-7EGZY	chr16:85880-90155062
UPN13	Gain	2.92	17	q25.3	p13.3	1373	81041.4	73347	arr[hg19] 17p13.3q25.3(525-81,041,938)x2-3	DOC2B, RPH3AL, LOC100506388, C17orf97, FAM101B, VPS53, FAM57A, GEMIN4, DBIL5P, GLOD4, RNMTL1, NXN, TIMM22, ABR, MIR3183, BHLHA9, TUSC5, YWHAE, CRK, MYO1C, INPP5K, PITPNA-AS1, PITPNA, SLC43A2, SCARF1, RILP, PRPF8, TLCD2, MIR22HG, MIR22, WDR81, SERPINF2, SERPINF1, SMYD4, RPA1, RTN4RL1, DPH1, OVCA2, MIR132, MIR212, HIC1, SMG6, SRR, TSR1, SNORD91B, SNORD91A, SGSM2, MNT, LOC284009, METTL16, PAFAH1B1, …	ALOX12, MLLT6, HLF, CRLF3, TP53, KSR1, BRCA1, PYY, PPM1D, FAM57A, RABEP1, GSDMA, TAF15, AATF, NF1, BCAS3, SPECC1, PER1, SLC9A3R1, RPL26, USP6, SHBG, PRKAR1A, RNF213, TIMP2, XAF1, IGF2BP1, RAD51D, STARD3, GRB2, HIC1, ELAC2, RAC3, SUZ12P, ERBB2, WRAP53, CASC3, SLC4A1, CLTC, SEPT9, CLDN7, TRIM37, DDX5, AXIN2, SRSF2, ALOX15, MSI2, ASPSCR1, MIR21, GAS7, NCOR1, ETV4, IKZF3, CDC6, KDM6B, RARA, TRPV1, LA…	hsa-mir-3183, hsa-mir-22, hsa-mir-132, hsa-mir-212, HBII-296B, HBII-296A, hsa-mir-1253, hsa-mir-195, hsa-mir-497, hsa-mir-324, ACA48, mgU6-77, U67, ACA68, hsa-mir-4314, U8, hsa-mir-744, hsa-mir-548h-3, hsa-mir-1288, U49B, U49A, HBII-135, hsa-mir-33b, U3-2, U3-2B, U3-4, U3, U3-3, hsa-mir-1180, ACA59B, U42B, mgh18S-121, U42A, Z17B, hsa-mir-451, hsa-mir-144, hsa-mir-423, hsa-mir-3184, hsa-mir-193a, …	C-5VAZU	S-4LRWR	chr17:525-81041938
UPN13	Gain	2.94	18	q23	p11.32	342	77877.9	66936	arr[hg19] 18p11.32q23(136,226-78,014,123)x2-3	USP14, THOC1, COLEC12, CETN1, CLUL1, C18orf56, TYMS, ENOSF1, YES1, ADCYAP1, LINC00470, METTL4, NDC80, CBX3P2, SMCHD1, EMILIN2, LPIN2, LOC727896, MYOM1, MYL12A, MYL12B, TGIF1, DLGAP1, DLGAP1-AS1, DLGAP1-AS3, DLGAP1-AS4, DLGAP1-AS5, C18orf42, LINC00526, LINC00667, ZBTB14, EPB41L3, LOC645355, MIR3976, TMEM200C, L3MBTL4, MIR4317, LOC100130480, ARHGAP28, LINC00668, LAMA1, LRRC30, PTPRM, LOC100192426, …	SS18, MBD2, MALT1, DSG2, GATA6, PHLPP1, DCC, PTPN2, MAPK4, SMAD4, SLC39A6, BCL2, SETBP1, SMAD2, EPB41L3, RBBP8, SERPINB5, ZNF521	hsa-mir-4317, hsa-mir-3156-2, hsa-mir-320c-1, hsa-mir-133a-1, hsa-mir-1-2, hsa-mir-320c-2, hsa-mir-302f, hsa-mir-187, hsa-mir-4318, hsa-mir-924, hsa-mir-4319, hsa-mir-1539, U58C, U58A, U58B, mgU12-22/U4-8, U91, hsa-mir-4320, ACA37, hsa-mir-122	C-7KBTZ	C-6HGFA	chr18:136226-78014123
UPN13	Gain	4	19	q13.32	q13.32	3	60.864	56	arr[hg19] 19q13.32(45,789,285-45,850,149)x4	MARK4, CKM, KLC3	MARK4		C-5GDWU	C-6NYWE	chr19:45789285-45850149
UPN13	Gain	4	21	q22.3	q11.2	293	33090.9	33620	arr[hg19] 21q11.2q22.3(15,006,457-48,097,372)x4	POTED, C21orf15, ANKRD20A11P, LIPI, RBM11, ABCC13, HSPA13, SAMSN1, SAMSN1-AS1, LOC388813, NRIP1, USP25, LINC00478, MIR99A, MIRLET7C, MIR125B2, C21orf37, CXADR, BTG3, C21orf91-OT1, C21orf91, CHODL-AS1, CHODL, TMPRSS15, LINC00320, NCAM2, RNU6-67P, LINC00317, LINC00308, D21S2088E, LOC339622, LINC00158, MIR155HG, MIR155, LINC00515, MRPL39, JAM2, ATP5J, GABPA, APP, CYYR1, ADAMTS1, ADAMTS5, MIR4759, MI…	U2AF1, PTTG1IP, TIAM1, MIR125B2, OLIG2, CSTB, ADAMTS1, NRIP1, TFF3, TFF2, TMPRSS3, ERG, ETS2, DYRK1A, TFF1, TMPRSS2, RUNX1, S100B	hsa-mir-3118-5, hsa-mir-99a, hsa-let-7c, hsa-mir-125b-2, hsa-mir-548x, hsa-mir-155, hsa-mir-4327, ACA67, hsa-mir-802, hsa-mir-3197	C-6OPRF	C-3ELOA	chr21:15006457-48097372
UPN13	Gain	2.91	22	q13.33	q11.1	544	34308.9	38296	arr[hg19] 22q11.1q13.33(16,888,899-51,197,838)x2-3	CCT8L2, TPTEP1, ANKRD62P1-PARP4P3, XKR3, HSFY1P1, GAB4, CECR7, IL17RA, CECR6, CECR5, CECR5-AS1, CECR1, CECR3, CECR2, SLC25A18, ATP6V1E1, BCL2L13, BID, MIR3198-1, LINC00528, MICAL3, MIR648, FLJ41941, PEX26, TUBA8, USP18, GGT3P, DGCR6, PRODH, DGCR5, DGCR9, DGCR10, DGCR2, DGCR11, DGCR14, TSSK2, GSC2, SLC25A1, CLTCL1, HIRA, MRPL40, C22orf39, UFD1L, CDC45, CLDN5, LINC00895, SEPT5, SEPT5-GP1BB, GP1BB, …	BCR, MCM5, MKL1, SMARCB1, RAC2, MAPK1, PARVB, VPREB1, MIF, EWSR1, IL2RB, CHEK2, PDGFB, SEPT5, IGL@, MYH9, XRCC6, TYMP, RBX1, CLTCL1, MMP11, BRD1, Sep.05, MN1, FBLN1, NF2, IGLL1, MAPK12, ATF4, SOX10, EP300	hsa-mir-3198, hsa-mir-648, hsa-mir-185, hsa-mir-1306, hsa-mir-1286, hsa-mir-649, hsa-mir-301b, hsa-mir-130b, hsa-mir-650, hsa-mir-548j, hsa-mir-3199-1, hsa-mir-3199-2, SNORD125, hsa-mir-3200, hsa-mir-658, hsa-mir-659, U83B, U83A, U43, hsa-mir-1281, hsa-mir-33a, hsa-mir-1249, hsa-let-7a-3, hsa-let-7b, hsa-mir-3201	S-3RTNJ	C-4WMOA	chr22:16888899-51197838
UPN13	Gain	3	X	q28	p22.33	1020	155065	189818	arr[hg19] Xp22.33q28(168,546-155,233,731)x3	PLCXD1, GTPBP6, LINC00685, PPP2R3B, SHOX, CRLF2, CSF2RA, MIR3690, IL3RA, SLC25A6, ASMTL-AS1, ASMTL, P2RY8, AKAP17A, ASMT, DHRSX, ZBED1, CD99P1, LINC00102, CD99, XG, XGPY2, GYG2, ARSD, ARSE, ARSH, ARSF, CXorf28, MXRA5, PRKX, LOC389906, NLGN4X, MIR4770, VCX3A, HDHD1, MIR4767, STS, VCX, PNPLA4, MIR651, VCX2, VCX3B, KAL1, FAM9A, FAM9B, TBL1X, GPR143, SHROOM2, LOC100288814, WWC3, CLCN4, MID1, HCCS, AR…	PHF6, RPL10, GATA1, GPC3, DKC1, DACH2, MIR221, L1CAM, STAG2, ARMCX1, IL3RA, CXCR3, MTCP1, SEPT6, FOXP3, FAM123B, NONO, RBBP7, RHOXF2, ZRSR2, ARMCX3, MSN, P2RY8, AIFM1, ARMCX2, KDM6A, ELF4, REPS2, Sep.06, SSX2, BRWD3, ZBTB33, TFE3, MIR222, AR, BTK, AMOT, BCOR, FOXO4, SPANXA1, CRLF2	hsa-mir-651, hsa-mir-1308, ACA12, hsa-mir-548f-5, hsa-mir-221, hsa-mir-222, SNORA11C, hsa-mir-532, hsa-mir-188, hsa-mir-500, hsa-mir-362, hsa-mir-501, hsa-mir-500b, hsa-mir-660, hsa-mir-502, SNORA11E, SNORA11D, hsa-mir-98, hsa-let-7f-2, U107, hsa-mir-1468, hsa-mir-223, hsa-mir-421, hsa-mir-374b, hsa-mir-545, hsa-mir-374a, hsa-mir-384, hsa-mir-325, hsa-mir-4328, hsa-mir-548i-4, hsa-mir-1321, hsa-m…	C-5QGHR	C-6KTXX	chrX:168546-155233731
UPN13	Gain	3	19	p13.3	p13.3	4	68.752	36	arr[hg19] 19p13.3(633,754-702,506)x3	FGF22, RNF126, FSTL3, PRSS57	FSTL3		C-5EQVJ	C-6PKYW	chr19:633754-702506
UPN13	LOH		19	q13.43	p13.3	1632	58836.8	11510	arr[hg19] 19p13.3q13.43(260,911-59,097,752) hmz	PPAP2C, MIER2, THEG, C2CD4C, SHC2, ODF3L2, MADCAM1, TPGS1, CDC34, GZMM, BSG, HCN2, POLRMT, FGF22, RNF126, FSTL3, PRSS57, PALM, MISP, PTBP1, MIR4745, LPPR3, MIR3187, AZU1, PRTN3, ELANE, CFD, MED16, R3HDM4, KISS1R, ARID3A, WDR18, GRIN3B, TMEM259, CNN2, ABCA7, HMHA1, POLR2E, GPX4, SBNO2, STK11, C19orf26, ATP5D, MIDN, CIRBP-AS1, CIRBP, C19orf24, EFNA2, MUM1, NDUFS7, GAMT, DAZAP1, RPS15, APC2, C19orf2…	GPI, KLK5, TCF3, JUNB, LYPD3, PLAUR, CD97, ATF5, MLLT1, UBA2, KLK7, JAK3, TFPT, PEG3, TPM4, ELL, BCL3, CEACAM1, JUND, RUVBL2, BAX, AXL, NPAS1, ZBTB7A, SH3GL1, ELAVL1, CRTC1, CYP2A6, GDF15, KLK4, MARK4, SCAF1, GADD45GIP1, GNA11, GLTSCR2, CBLC, PPP1R13L, MIR125A, RELB, LYL1, SLC5A5, VAV1, BCL2L12, TYK2, ERCC1, PAF1, FXYD5, BRD4, CNOT3, DNMT1, DYRK1B, EPOR, ZC3H4, CALR, AKT2, FCER2, DNM2, WTIP, NOTC…	hsa-mir-3187, hsa-mir-1909, hsa-mir-1227, hsa-mir-4321, hsa-mir-637, U37, hsa-mir-7-3, hsa-mir-220b, U105, U105B, hsa-mir-4322, hsa-mir-1181, hsa-mir-1238, hsa-mir-638, hsa-mir-199a-1, U41, hsa-mir-24-2, hsa-mir-27a, hsa-mir-23a, hsa-mir-181c, hsa-mir-181d, hsa-mir-639, hsa-mir-1470, U68, hsa-mir-3188, hsa-mir-3189, hsa-mir-640, hsa-mir-1270-1, hsa-mir-1270-2, hsa-mir-641, hsa-mir-4323, hsa-mir-3…	S-4CJRO	S-3PNCX	chr19:260911-59097752
UPN13	LOH		20	q13.33	p13	653	62852.2	16877	arr[hg19] 20p13q13.33(61,794-62,913,996) hmz	DEFB125, DEFB126, DEFB127, DEFB128, DEFB129, DEFB132, C20orf96, ZCCHC3, SOX12, NRSN2, TRIB3, RBCK1, TBC1D20, CSNK2A1, TCF15, SRXN1, SCRT2, SLC52A3, FAM110A, ANGPT4, RSPO4, PSMF1, TMEM74B, C20orf202, RAD21L1, SNPH, SDCBP2, FKBP1A-SDCBP2, SDCBP2-AS1, FKBP1A, NSFL1C, SIRPB2, SIRPD, SIRPB1, SIRPG, LOC100289473, SIRPA, PDYN, STK35, TGM3, TGM6, SNRPB, SNORD119, ZNF343, TMC2, NOP56, MIR1292, SNORD110, S…	NOL4L (C20orf112), MAFB, SNAI1, ZNF217, C20orf94, BLCAP, ASXL1, SRC, NCOA3, AURKA, RASSF2, PLAGL2, STK4, E2F1, SS18L1, UBE2C, CBFA2T2, MYBL2, CSE1L, WISP2, TNFRSF6B, NKX2-2, TOP1, MMP9, BCAS4, PTGIS, PLCB1, BCL2L1, JAG1, MAPRE1, EEF1A2	SNORD119, hsa-mir-1292, HBII-55, ACA51, U86, U56, U57, hsa-mir-103-2, hsa-mir-103-2-as, HBI-43, hsa-mir-3192, hsa-mir-663, hsa-mir-3193, hsa-mir-1825, hsa-mir-644, hsa-mir-499, hsa-mir-1289-1, U71b, U71a, U71c, U71d, ACA39, ACA60, U106, hsa-mir-1259, HBII-99B, HBII-99, hsa-mir-645, hsa-mir-1302-5, hsa-mir-3194, hsa-mir-4325, hsa-mir-296, hsa-mir-298, hsa-mir-646, hsa-mir-1257, hsa-mir-3195, hsa-m…	S-3XJAP	S-3VKZA	chr20:61794-62913996
UPN14	LOH		12	q24.33	p13.33	1184	133612	35526	arr[hg19] 12p13.33q24.33(166,332-133,778,166) hmz	IQSEC3, LOC574538, SLC6A12, SLC6A13, KDM5A, CCDC77, B4GALNT3, NINJ2, WNK1, RAD52, ERC1, LINC00942, FBXL14, WNT5B, MIR3649, ADIPOR2, CACNA2D4, LRTM2, LINC00940, DCP1B, CACNA1C, CACNA1C-AS4, CACNA1C-IT3, CACNA1C-AS1, LOC283440, FKBP4, ITFG2, NRIP2, LOC100507424, FOXM1, RHNO1, TULP3, TEAD4, TSPAN9, PRMT8, EFCAB4B, PARP11, CCND2, C12orf5, FGF23, FGF6, C12orf4, RAD51AP1, DYRK4, AKAP3, NDUFA9, GALNT8, …	DDIT3, USP15, RAN, HNRNPA1 , P2RX7, ATF7IP, PTHLH, GLI1, AGAP2, FBRSL1, PEBP1, KITLG, ELK3, GUCY2C, HMGA2, ASCL1, SMARCC2, IL22, CCND2, ATF1, BTG1, KDM5A, SLC5A8, VWF, DRAM1, SOX5, PPFIBP1, GABARAPL1, IL23A, FOXM1, MDM2, KLRK1, BCL2L14, MIR200C, EP400, TSPAN8, ALDH2, ETNK1, RAP1B, CDKN1B, DUSP6, PTPN11, CHFR, ERC1, HOXC13, EPS8, CD9, SH2B3, CDK4, ETV6, PA2G4, PRKAB1, PXN, PAWR, ING4, METAP2, APAF…	U85, ACA57, hsa-mir-200c, hsa-mir-141, U89, hsa-mir-1244-3, hsa-mir-613, hsa-mir-614, hsa-mir-920, hsa-mir-4302, ACA34, hsa-mir-1291, ACA2a, ACA2b, hsa-mir-1293, hsa-mir-196a-2, hsa-mir-615, hsa-mir-148b, U59B, U59A, hsa-mir-1228, hsa-mir-616, hsa-mir-26a-2, hsa-let-7i, hsa-mir-548c, U70G, hsa-mir-1279, hsa-mir-1252, hsa-mir-617, hsa-mir-618, hsa-mir-492, hsa-mir-331, hsa-mir-1251, hsa-mir-135a-2…	S-3WBKX	S-4NRKL	chr12:166332-133778166
UPN14	LOH		16	q24.3	p13.3	955	90073.7	22043	arr[hg19] 16p13.3q24.3(89,560-90,163,275) hmz	POLR3K, SNRNP25, RHBDF1, MPG, NPRL3, HBZ, HBM, HBA2, HBA1, HBQ1, LUC7L, ITFG3, RGS11, ARHGDIG, PDIA2, AXIN1, MRPL28, TMEM8A, LOC100134368, NME4, DECR2, RAB11FIP3, LINC00235, SOLH, MIR5587, MIR3176, C16orf11, NHLRC4, PIGQ, RAB40C, WFIKKN1, C16orf13, FAM195A, WDR90, RHOT2, RHBDL1, STUB1, JMJD8, WDR24, FBXL16, METRN, FAM173A, CCDC78, HAGHL, NARFL, MSLN, MIR662, RPUSD1, CHTF18, GNG13, PRR25, LMF1, SO…	FBXO31, CENPT, USP7, RANBP10, FUS, CYLD, NQO1, EIF3C, CDT1, ACD, FANCA, CREBBP, IL21R, ZFHX3, CTCF, WFDC1, PHLPP2, ERCC4, SOCS1, ABCC1, TRAP1, NOL3, MYH11, CBFB, RLTPR, MAF, AMFR, GFOD2, CDH1, TSNAXIP1, PLK1, MMP2, PKD1, AXIN1, FAM65A, WWOX, MVP, CDH13, RBL2, MAPK3, CIITA, CBFA2T3, TERF2, TSC2	hsa-mir-3176, hsa-mir-662, hsa-mir-3177, ACA10, U64, ACA64, hsa-mir-1225, U60, hsa-mir-940, hsa-mir-3178, hsa-mir-548h-2, hsa-mir-193b, hsa-mir-365-1, hsa-mir-3179-1, hsa-mir-3180-1, hsa-mir-1972-1, hsa-mir-484, hsa-mir-3179-2, hsa-mir-3180-2, hsa-mir-3180-3, hsa-mir-3179-3, hsa-mir-548w, ACA30, hsa-mir-762, hsa-mir-1826, hsa-mir-3181, hsa-mir-138-2, ACA46, ACA50, hsa-mir-328, hsa-mir-1538, hsa-m…	S-3AEPI	S-3VXPE	chr16:89560-90163275
UPN14	Gain	4	1	q32.1	q21.1	781	60931.7	58805	arr[hg19] 1q21.1q32.1(145,398,177-206,329,926)x4	LOC100288142, NBPF10, HFE2, TXNIP, POLR3GL, ANKRD34A, LIX1L, RBM8A, GNRHR2, PEX11B, ITGA10, ANKRD35, PIAS3, NUDT17, POLR3C, RNF115, CD160, PDZK1, GPR89A, GPR89C, PDZK1P1, NBPF24, NBPF11, HYDIN2, NBPF12, LOC728989, NBPF13P, PRKAB2, PDIA3P, FMO5, CHD1L, LINC00624, BCL9, ACP6, GJA5, GJA8, GPR89B, NBPF8, MIR5087, FLJ39739, PPIAL4B, PPIAL4A, PPIAL4D, PPIAL4F, NBPF14, NBPF9, NBPF15, NBPF16, PPIAL4E, LO…	CREG1, FCGR2B, RCSD1, ADIPOR1, PTPRC, CRTC2, SHC1, PRCC, CKS1B, S100A10, BCL9, PIAS3, GAS5, ABL2, IGSF8, MEF2D, PLA2G4A, S100A1, RPS27, PBX1, TNFSF18, PVRL4, PRRX1, CDC73, RGS2, PTPN7, S100A4, ASPM, S100A13, DHX9, TPM3, ARHGEF2, S100A9, TPR, PTGS2, USF1, MLLT11, GLRX2, SDHC, ARNT, S100A8, ECM1, TNN, B3GALT2, S100A7, TROVE2, SELE, KIF14, GPA33	hsa-mir-4257, hsa-mir-554, hsa-mir-190b, hsa-mir-4258, hsa-mir-92b, hsa-mir-555, ACA42, ACA26, hsa-mir-9-1, hsa-mir-765, hsa-mir-4259, hsa-mir-556, hsa-mir-921, hsa-mir-1255b-2, hsa-mir-557, hsa-mir-3119-1, hsa-mir-3119-2, hsa-mir-1295, hsa-mir-214, hsa-mir-3120, hsa-mir-199a-2, U81, U47, U80, U79, U78, U44, U77, U76, U75, U74, HBI-100, hsa-mir-488, hsa-mir-3121, hsa-mir-1278, hsa-mir-181b-1, hsa…	C-6QWXA	C-4YXKL	chr1:145398177-206329926
UPN14	Gain	3	4	q35.2	p16.3	891	190889	153163	arr[hg19] 4p16.3q35.2(68,345-190,957,473)x3	ZNF595, ZNF718, ZNF876P, ZNF732, ZNF141, ABCA11P, ZNF721, PIGG, PDE6B, ATP5I, MYL5, MFSD7, PCGF3, LOC100129917, CPLX1, GAK, TMEM175, DGKQ, SLC26A1, IDUA, FGFRL1, RNF212, TMED11P, SPON2, LOC100130872, CTBP1, CTBP1-AS2, MAEA, UVSSA, CRIPAK, FAM53A, SLBP, TMEM129, TACC3, FGFR3, LETM1, WHSC1, SCARNA22, NELFA, MIR943, C4orf48, NAT8L, POLN, HAUS3, MXD4, MIR4800, ZFYVE28, LOC402160, RNF4, FAM193A, TNIP2…	S100P, RCHY1, FGF2, FGFR3, FIP1L1, RASSF6, CHIC2, SYNPO2, FRYL, REST, TET2, MAD2L1, NR3C2, NUDT6, FAT1, KIT, WHSC1, AFF1, NFKB1, ING2, RAP1GDS1, EIF4E, AREG, LEF1, FBXW7, SORBS2, PDGFRA, TACC3, HNRNPD, NPY1R, RASL11B, RHOH, PTPN13, MAPK10, SPP1	hsa-mir-571, ACA11, hsa-mir-943, hsa-mir-4274, hsa-mir-95, hsa-mir-548i-2, hsa-mir-3138, hsa-mir-572, hsa-mir-218-1, hsa-mir-573, hsa-mir-4275, hsa-mir-1255b-1, hsa-mir-574, HBI-6, hsa-mir-1269, hsa-mir-575, hsa-mir-1255a, hsa-mir-576, hsa-mir-297, hsa-mir-367, hsa-mir-302d, hsa-mir-302a, hsa-mir-302c, hsa-mir-302b, hsa-mir-1243, hsa-mir-577, hsa-mir-1973, ACA24, hsa-mir-2054, hsa-mir-3139, hsa-m…	C-4FYJV	C-7HDOD	chr4:68345-190957473
UPN14	Gain	3	6	q27	p25.3	1220	170763	155053	arr[hg19] 6p25.3q27(156,974-170,919,482)x3	DUSP22, IRF4, EXOC2, HUS1B, LOC285768, FOXQ1, FOXF2, FOXC1, GMDS, LOC100508120, C6orf195, MYLK4, WRNIP1, SERPINB1, MIR4645, MGC39372, SERPINB9, SERPINB6, DKFZP686I15217, NQO2, HTATSF1P2, RIPK1, BPHL, TUBB2A, LOC100507194, TUBB2B, PSMG4, SLC22A23, PXDC1, FAM50B, PRPF4B, FAM217A, C6orf201, ECI2, CDYL, RPP40, PPP1R3G, LYRM4, MIR3691, FARS2, NRN1, F13A1, LY86-AS1, LY86, RREB1, SSR1, CAGE1, RIOK1, DSP…	CD109, CEP85L, PPARD, CTGF, MLLT4, IGF2R, DAXX, CCND3, AHI1, BCLAF1, FOXO3, SOX4, ID4, LIN28B, CCNC, PLAGL1, FGFR1OP, SESN1, IRF4, TFAP2A, TNFAIP3, IER3, DEK, DDR1, CDKN1A, FANCE, LATS1, PRDM1, THBS2, DDX43, CITED2, BAK1, MYB, JARID2, CASP8AP2 , POLH, HIST1H2BH, WISP3, IL17A, HIST1H3F, HMGA1, EEF1A1, HFE, RUNX2, MAPK13, TFEB, ZFAND3, EPHA7, CAGE1, RNF217-AS1, hsa-mir-548a-2, AKAP12, AGER, MAP3K7,…	hsa-mir-548a-1, hsa-mir-3143, U32B, hsa-mir-877, U83, U84, ACA38, U48, U52, hsa-mir-1236, hsa-mir-219-1, hsa-mir-1275, hsa-mir-586, hsa-mir-206, hsa-mir-133b, hsa-mir-548u, hsa-mir-30c-2, hsa-mir-30a, hsa-mir-4282, U50, U50B, hsa-mir-2113, hsa-mir-587, hsa-mir-548b, hsa-mir-3144, hsa-mir-588, U101, HBII-429, ACA33, hsa-mir-548a-2, hsa-mir-3145, hsa-mir-1273c, hsa-mir-1202, ACA20, ACA29, hsa-mir-1…	C-3GOBV	C-5ELRJ	chr6:156974-170919482
UPN14	Gain	3	8	q24.3	p23.3	837	146138	125254	arr[hg19] 8p23.3q24.3(158,048-146,295,771)x3	RPL23AP53, ZNF596, FAM87A, FBXO25, TDRP, ERICH1, ERICH1-AS1, LOC286083, DLGAP2, CLN8, MIR596, ARHGEF10, KBTBD11, MYOM2, CSMD1, LOC100287015, MCPH1, ANGPT2, AGPAT5, MIR4659A, MIR4659B, XKR5, LOC100652791, DEFB1, DEFA6, DEFA4, DEFA8P, DEFA9P, DEFA10P, DEFA1, DEFA1B, DEFT1P, DEFT1P2, DEFA3, DEFA11P, DEFA5, LINC00965, FAM66B, DEFB109P1B, USP17L1P, USP17L4, ZNF705G, DEFB4B, DEFB103B, DEFB103A, SPAG11B…	PTK2, COX6C, DEFB1, MTUS1, ASH2L, NBN, RUNX1T1, ADAM9, NDRG1, TPD52, EIF4EBP1, PSCA, TP53INP1, TNFRSF11B, BOP1, LOXL2, FGFR1, MAFA, SNAI2, NCOA2, MYC, PTK2B, WRN, WHSC1L1, HAS2, RNF139, PCM1, IDO2, NAT2, PLAG1, TACC1, PAG1, NKX3-1, ENPP2, MCPH1, TOX, MYBL1, DLC1, IDO1, KAT6A, CTHRC1, EBAG9, RECQL4, CTSB, CYP7A1, NAT1, EXT1, CYP7B1, TNKS, KIAA1967, CLU, RHOBTB2, BAALC, GGH, WWP1, RAD21	hsa-mir-596, hsa-mir-548i-3, hsa-mir-597, hsa-mir-124-1, hsa-mir-4286, hsa-mir-1322, hsa-mir-598, hsa-mir-383, hsa-mir-548v, hsa-mir-320a, hsa-mir-548h-4, hsa-mir-4287, hsa-mir-4288, hsa-mir-3148, U13, hsa-mir-486, U54, hsa-mir-124-2, HBII-276, hsa-mir-2052, hsa-mir-3149, hsa-mir-3150, U72, hsa-mir-599, hsa-mir-875, hsa-mir-1273, hsa-mir-3151, hsa-mir-548a-3, hsa-mir-2053, hsa-mir-548d-1, hsa-mir…	C-5YVTF	C-3WEHE	chr8:158048-146295771
UPN14	Gain	3	10	q26.3	p15.3	921	135327	133229	arr[hg19] 10p15.3q26.3(100,026-135,427,143)x3	ZMYND11, DIP2C, MIR5699, PRR26, LARP4B, GTPBP4, IDI2, IDI2-AS1, IDI1, WDR37, LINC00200, ADARB2, ADARB2-AS1, LINC00700, LINC00701, PFKP, PITRM1, PITRM1-AS1, KLF6, LINC00704, LINC00705, AKR1E2, AKR1C6P, AKR1C1, AKR1C2, AKR1C3, AKR1CL1, AKR1C4, UCN3, TUBAL3, NET1, CALML5, CALML3, ASB13, FAM208B, GDI2, ANKRD16, FBXO18, IL15RA, IL2RA, RBM17, PFKFB3, MIR3155A, MIR3155B, LOC399715, PRKCQ, PRKCQ-AS1, LIN…	GATA3, SIRT1, MLLT10, FGFR2, DMBT1, KLF6, BNIP3, NT5C2, LGI1, ZMIZ1, HTRA1, TLX1, ADAM12, AKR1C3, KAT6B, ERCC6, NCOA4, AIFM2, ALOX5, PDCD4, DKK1, FGF8, LDB1, BMI1, PTEN, ARID5B, NET1, BLNK, BTRC, ADD3, LOXL4, SNCG, NFKB2, TET1, EIF3A, BAG3, PSAP, MXI1, PAX2, MRC1, RHOBTB1, MAPK8, CCDC6, ABI1, RET	hsa-mir-3155, hsa-mir-548q, hsa-mir-4293, hsa-mir-1265, hsa-mir-511-1, hsa-mir-511-2, hsa-mir-1915, hsa-mir-603, hsa-mir-604, hsa-mir-938, hsa-mir-3156-1, hsa-mir-4294, hsa-mir-605, hsa-mir-548f-1, hsa-mir-1296, HBII-419, hsa-mir-1254, hsa-mir-606, hsa-mir-346, hsa-mir-107, hsa-mir-3157, hsa-mir-607, hsa-mir-1287, U108, hsa-mir-608, hsa-mir-3158-2, hsa-mir-3158-1, hsa-mir-146b, hsa-mir-1307, hsa-…	C-4CDQJ	C-5DPFD	chr10:100026-135427143
UPN14	Gain	4	14	q32.33	q11.2	770	86773.8	85690	arr[hg19] 14q11.2q32.33(20,511,672-107,285,437)x4	OR4L1, OR4K17, OR4N5, OR11G2, OR11H6, OR11H4, TTC5, CCNB1IP1, SNORD126, RPPH1, PARP2, TEP1, KLHL33, OSGEP, APEX1, TMEM55B, PNP, RNASE10, RNASE9, RNASE11, RNASE12, OR6S1, ANG, RNASE4, EDDM3A, EDDM3B, RNASE6, RNASE1, RNASE3, ECRP, RNASE2, METTL17, SLC39A2, NDRG2, TPPP2, RNASE13, RNASE7, RNASE8, ARHGEF40, ZNF219, TMEM253, OR5AU1, LINC00641, HNRNPC, RPGRIP1, SUPT16H, CHD8, SNORD9, SNORD8, RAB2B, TOX4…	PAX9, STRN3, NIN, GPHN, PTPN21, MTA1, JAG2, SEL1L, TRA, EML1, NDRG2, SIX1, DPF3, NUMB, VRK1, MMP14, TRAF3, FOXA1, TCL6, PRKD1, NKX2-1, FUT8, IGH@, TRA@, TRD@, TSHR, ANG, XRCC3, ZFP36L1, TCL1B, AKT1, OTX2, TCL1A, DIO2, TRD, GPR68, MEG3, BCL11B, TRIP11, LGALS3, ESR2, SAV1, IGH	hsa-mir-1201, SNORD126, mgU6-53B, mgU6-53, hsa-mir-208a, hsa-mir-208b, hsa-mir-4307, hsa-mir-3171, hsa-mir-624, hsa-mir-3172, SNORD127, hsa-mir-4308, hsa-mir-548h-1, hsa-mir-625, hsa-mir-1260, ACA65, SNORA11B, hsa-mir-3173, U93, hsa-mir-342, hsa-mir-345, hsa-mir-770, hsa-mir-493, hsa-mir-337, hsa-mir-665, hsa-mir-431, hsa-mir-433, hsa-mir-127, hsa-mir-432, hsa-mir-136, 14q(0), hsa-mir-370, 14q(I-…	S-4ETOO	S-3HXYB	chr14:20511672-107285437
UPN14	Gain	3	17	q25.3	p13.3	1373	81041.4	73347	arr[hg19] 17p13.3q25.3(525-81,041,938)x3	DOC2B, RPH3AL, LOC100506388, C17orf97, FAM101B, VPS53, FAM57A, GEMIN4, DBIL5P, GLOD4, RNMTL1, NXN, TIMM22, ABR, MIR3183, BHLHA9, TUSC5, YWHAE, CRK, MYO1C, INPP5K, PITPNA-AS1, PITPNA, SLC43A2, SCARF1, RILP, PRPF8, TLCD2, MIR22HG, MIR22, WDR81, SERPINF2, SERPINF1, SMYD4, RPA1, RTN4RL1, DPH1, OVCA2, MIR132, MIR212, HIC1, SMG6, SRR, TSR1, SNORD91B, SNORD91A, SGSM2, MNT, LOC284009, METTL16, PAFAH1B1, …	ALOX12, MLLT6, HLF, CRLF3, TP53, KSR1, BRCA1, PYY, PPM1D, FAM57A, RABEP1, GSDMA, TAF15, AATF, NF1, BCAS3, SPECC1, PER1, SLC9A3R1, RPL26, USP6, SHBG, PRKAR1A, RNF213, TIMP2, XAF1, IGF2BP1, RAD51D, STARD3, GRB2, HIC1, ELAC2, RAC3, SUZ12P, ERBB2, WRAP53, CASC3, SLC4A1, CLTC, SEPT9, CLDN7, TRIM37, DDX5, AXIN2, SRSF2, ALOX15, MSI2, ASPSCR1, MIR21, GAS7, NCOR1, ETV4, IKZF3, CDC6, KDM6B, RARA, TRPV1, LA…	hsa-mir-3183, hsa-mir-22, hsa-mir-132, hsa-mir-212, HBII-296B, HBII-296A, hsa-mir-1253, hsa-mir-195, hsa-mir-497, hsa-mir-324, ACA48, mgU6-77, U67, ACA68, hsa-mir-4314, U8, hsa-mir-744, hsa-mir-548h-3, hsa-mir-1288, U49B, U49A, HBII-135, hsa-mir-33b, U3-2, U3-2B, U3-4, U3, U3-3, hsa-mir-1180, ACA59B, U42B, mgh18S-121, U42A, Z17B, hsa-mir-451, hsa-mir-144, hsa-mir-423, hsa-mir-3184, hsa-mir-193a, …	C-5VAZU	S-4LRWR	chr17:525-81041938
UPN14	Gain	3	18	q23	p11.32	342	77877.9	66936	arr[hg19] 18p11.32q23(136,226-78,014,123)x3	USP14, THOC1, COLEC12, CETN1, CLUL1, C18orf56, TYMS, ENOSF1, YES1, ADCYAP1, LINC00470, METTL4, NDC80, CBX3P2, SMCHD1, EMILIN2, LPIN2, LOC727896, MYOM1, MYL12A, MYL12B, TGIF1, DLGAP1, DLGAP1-AS1, DLGAP1-AS3, DLGAP1-AS4, DLGAP1-AS5, C18orf42, LINC00526, LINC00667, ZBTB14, EPB41L3, LOC645355, MIR3976, TMEM200C, L3MBTL4, MIR4317, LOC100130480, ARHGAP28, LINC00668, LAMA1, LRRC30, PTPRM, LOC100192426, …	SS18, MBD2, MALT1, DSG2, GATA6, PHLPP1, DCC, PTPN2, MAPK4, SMAD4, SLC39A6, BCL2, SETBP1, SMAD2, EPB41L3, RBBP8, SERPINB5, ZNF521	hsa-mir-4317, hsa-mir-3156-2, hsa-mir-320c-1, hsa-mir-133a-1, hsa-mir-1-2, hsa-mir-320c-2, hsa-mir-302f, hsa-mir-187, hsa-mir-4318, hsa-mir-924, hsa-mir-4319, hsa-mir-1539, U58C, U58A, U58B, mgU12-22/U4-8, U91, hsa-mir-4320, ACA37, hsa-mir-122	C-7KBTZ	C-6HGFA	chr18:136226-78014123
UPN14	Gain	4	21	q22.3	q11.2	293	33090.9	33620	arr[hg19] 21q11.2q22.3(15,006,457-48,097,372)x4	POTED, C21orf15, ANKRD20A11P, LIPI, RBM11, ABCC13, HSPA13, SAMSN1, SAMSN1-AS1, LOC388813, NRIP1, USP25, LINC00478, MIR99A, MIRLET7C, MIR125B2, C21orf37, CXADR, BTG3, C21orf91-OT1, C21orf91, CHODL-AS1, CHODL, TMPRSS15, LINC00320, NCAM2, RNU6-67P, LINC00317, LINC00308, D21S2088E, LOC339622, LINC00158, MIR155HG, MIR155, LINC00515, MRPL39, JAM2, ATP5J, GABPA, APP, CYYR1, ADAMTS1, ADAMTS5, MIR4759, MI…	U2AF1, PTTG1IP, TIAM1, MIR125B2, OLIG2, CSTB, ADAMTS1, NRIP1, TFF3, TFF2, TMPRSS3, ERG, ETS2, DYRK1A, TFF1, TMPRSS2, RUNX1, S100B	hsa-mir-3118-5, hsa-mir-99a, hsa-let-7c, hsa-mir-125b-2, hsa-mir-548x, hsa-mir-155, hsa-mir-4327, ACA67, hsa-mir-802, hsa-mir-3197	C-6OPRF	C-3ELOA	chr21:15006457-48097372
UPN14	Gain	3	X	q28	p22.33	1020	155065	189818	arr[hg19] Xp22.33q28(168,546-155,233,731)x3	PLCXD1, GTPBP6, LINC00685, PPP2R3B, SHOX, CRLF2, CSF2RA, MIR3690, IL3RA, SLC25A6, ASMTL-AS1, ASMTL, P2RY8, AKAP17A, ASMT, DHRSX, ZBED1, CD99P1, LINC00102, CD99, XG, XGPY2, GYG2, ARSD, ARSE, ARSH, ARSF, CXorf28, MXRA5, PRKX, LOC389906, NLGN4X, MIR4770, VCX3A, HDHD1, MIR4767, STS, VCX, PNPLA4, MIR651, VCX2, VCX3B, KAL1, FAM9A, FAM9B, TBL1X, GPR143, SHROOM2, LOC100288814, WWC3, CLCN4, MID1, HCCS, AR…	PHF6, RPL10, GATA1, GPC3, DKC1, DACH2, MIR221, L1CAM, STAG2, ARMCX1, IL3RA, CXCR3, MTCP1, SEPT6, FOXP3, FAM123B, NONO, RBBP7, RHOXF2, ZRSR2, ARMCX3, MSN, P2RY8, AIFM1, ARMCX2, KDM6A, ELF4, REPS2, Sep.06, SSX2, BRWD3, ZBTB33, TFE3, MIR222, AR, BTK, AMOT, BCOR, FOXO4, SPANXA1, CRLF2	hsa-mir-651, hsa-mir-1308, ACA12, hsa-mir-548f-5, hsa-mir-221, hsa-mir-222, SNORA11C, hsa-mir-532, hsa-mir-188, hsa-mir-500, hsa-mir-362, hsa-mir-501, hsa-mir-500b, hsa-mir-660, hsa-mir-502, SNORA11E, SNORA11D, hsa-mir-98, hsa-let-7f-2, U107, hsa-mir-1468, hsa-mir-223, hsa-mir-421, hsa-mir-374b, hsa-mir-545, hsa-mir-374a, hsa-mir-384, hsa-mir-325, hsa-mir-4328, hsa-mir-548i-4, hsa-mir-1321, hsa-m…	C-5QGHR	C-6KTXX	chrX:168546-155233731
UPN14	Loss	1	9	p24.1	p24.1	1	3.744	20	arr[hg19] 9p24.1(5,037,443-5,041,187)x1	JAK2	JAK2		C-6GTGE	C-7GMNS	chr9:5037443-5041187
UPN14	Loss	1	12	p13.2	p13.2	2	16.22	26	arr[hg19] 12p13.2(11,943,589-11,959,809)x1	ETV6, RNU6-19P	ETV6		C-7OOTV	C-3MFOX	chr12:11943589-11959809
UPN14	Loss	1	16	p13.3	p13.3	1	9.369	22	arr[hg19] 16p13.3(3,865,413-3,874,782)x1	CREBBP	CREBBP		C-3FPCI	S-4PCEY	chr16:3865413-3874782
UPN15	LOH		X	q26.2	q25	20	3443.92	450	arr[hg19] Xq25q26.2(127,304,525-130,748,441) hmz	SMARCA1, OCRL, APLN, XPNPEP2, SASH3, ZDHHC9, UTP14A, BCORL1, ELF4, AIFM1, RAB33A, ZNF280C, SLC25A14, GPR119, RBMX2, FAM45B, ENOX2, ARHGAP36, IGSF1, OR13H1	AIFM1, ELF4		S-4AMBO	S-3UBWQ	chrX:127304525-130748441
UPN15	LOH		X	q26.3	q26.2	42	3726.35	391	arr[hg19] Xq26.2q26.3(130,889,905-134,616,259) hmz	LOC286467, MST4, FRMD7, RAP2C, MBNL3, HS6ST2, HS6ST2-AS1, USP26, TFDP3, GPC4, GPC3, MIR363, MIR92A2, MIR19B2, MIR20B, MIR18B, MIR106A, CCDC160, PHF6, HPRT1, MIR450B, MIR450A1, MIR450A2, MIR542, MIR503HG, MIR503, MIR424, LINC00629, PLAC1, FAM122B, FAM122C, MOSPD1, SMIM10, FAM127C, FAM127A, FAM127B, LINC00087, LINC00633, CXorf48, ZNF75D, ZNF449, LINC00086	PHF6, GPC3	hsa-mir-363, hsa-mir-92a-2, hsa-mir-19b-2, hsa-mir-20b, hsa-mir-18b, hsa-mir-106a, hsa-mir-450b, hsa-mir-450a-1, hsa-mir-450a-2, hsa-mir-542, hsa-mir-503, hsa-mir-424	S-3JIII	S-3XTXL	chrX:130889905-134616259
UPN15	Loss	1	7	p11.2	p22.3	380	57826.1	58500	arr[hg19] 7p22.3p11.2(43,360-57,869,418)x1	FAM20C, LOC100288524, LOC442497, PDGFA, FLJ44511, PRKAR1B, HEATR2, SUN1, GET4, ADAP1, COX19, CYP2W1, C7orf50, MIR339, GPR146, GPER, ZFAND2A, UNCX, MICALL2, INTS1, MAFK, TMEM184A, PSMG3, PSMG3-AS1, TFAMP1, ELFN1, MAD1L1, MIR4655, FTSJ2, NUDT1, SNX8, EIF3B, CHST12, LFNG, MIR4648, BRAT1, IQCE, TTYH3, AMZ1, GNA12, CARD11, SDK1, FOXK1, AP5Z1, MIR4656, RADIL, PAPOLB, MMD2, RNF216P1, RBAK, RBAK-RBAKDN, …	HOXA13, NPY, IL6, GPER, TWIST1, DDC, HOXA11, GRB10, TRG@, FSCN1, POU6F2, HUS1, GPNMB, ANLN, JAZF1, THSD7A, IKZF1, CYP2W1, SFRP4, ABCB5, HOXA9, ACTB	hsa-mir-339, hsa-mir-589, hsa-mir-1302-6, hsa-mir-3146, hsa-mir-1183, HBII-336, hsa-mir-148a, hsa-mir-196b, hsa-mir-550-1, hsa-mir-550-2, hsa-mir-548n, hsa-mir-1200, ACA9, ACA5, ACA5c, ACA5b, ACA15, hsa-mir-4283-1, hsa-mir-3147	C-7RSJF	C-3YAGV	chr7:43360-57869418
	Loss	1	20	p12.3	p13	101	5368.22	5420	arr[hg19] 20p13p12.3(62,908-5,431,127)x1	DEFB125, DEFB126, DEFB127, DEFB128, DEFB129, DEFB132, C20orf96, ZCCHC3, SOX12, NRSN2, TRIB3, RBCK1, TBC1D20, CSNK2A1, TCF15, SRXN1, SCRT2, SLC52A3, FAM110A, ANGPT4, RSPO4, PSMF1, TMEM74B, C20orf202, RAD21L1, SNPH, SDCBP2, FKBP1A-SDCBP2, SDCBP2-AS1, FKBP1A, NSFL1C, SIRPB2, SIRPD, SIRPB1, SIRPG, LOC100289473, SIRPA, PDYN, STK35, TGM3, TGM6, SNRPB, SNORD119, ZNF343, TMC2, NOP56, MIR1292, SNORD110, S…	RASSF2	SNORD119, hsa-mir-1292, HBII-55, ACA51, U86, U56, U57, hsa-mir-103-2, hsa-mir-103-2-as	C-7JEIB	C-6LKUV	chr20:62908-5431127
UPN15	Gain	3	1	q44	q21.3	1045	98896.2	101212	arr[hg19] 1q21.3q44(150,328,474-249,224,684)x3	RPRD2, TARS2, ECM1, LINC00568, ADAMTSL4, MIR4257, MCL1, ENSA, GOLPH3L, HORMAD1, CTSS, CTSK, ARNT, SETDB1, CERS2, ANXA9, FAM63A, PRUNE, BNIPL, C1orf56, CDC42SE1, MLLT11, GABPB2, SEMA6C, TNFAIP8L2, TNFAIP8L2-SCNM1, LYSMD1, SCNM1, TMOD4, VPS72, PIP5K1A, PSMD4, ZNF687, PI4KB, RFX5, SELENBP1, PSMB4, POGZ, CGN, TUFT1, MIR554, SNX27, CELF3, RIIAD1, MRPL9, OAZ3, TDRKH, LINGO4, RORC, C2CD4D, LOC100132111,…	CREG1, FCGR2B, EGLN1, MAPKAPK2, RCSD1, ADIPOR1, PTPRC, CRTC2, SHC1, PRCC, CKS1B, ATF3, S100A10, KCNH1, CENPF, GAS5, ABL2, IGSF8, SMYD3, MEF2D, SMYD2, PLA2G4A, S100A1, RPS27, PBX1, TNFSF18, PVRL4, PRRX1, TP53BP2, CDC73, DUSP10, RGS2, PTPN7, S100A4, ASPM, S100A13, DHX9, TPM3, ARHGEF2, S100A9, MIXL1, TPR, ENAH, PTGS2, USF1, MLLT11, GLRX2, ESRRG, SDHC, AKT3, PSEN2, ARNT, S100A8, ECM1, TNN, B3GALT2, S…	hsa-mir-4257, hsa-mir-554, hsa-mir-190b, hsa-mir-4258, hsa-mir-92b, hsa-mir-555, ACA42, ACA26, hsa-mir-9-1, hsa-mir-765, hsa-mir-4259, hsa-mir-556, hsa-mir-921, hsa-mir-1255b-2, hsa-mir-557, hsa-mir-3119-1, hsa-mir-3119-2, hsa-mir-1295, hsa-mir-214, hsa-mir-3120, hsa-mir-199a-2, U81, U47, U80, U79, U78, U44, U77, U76, U75, U74, HBI-100, hsa-mir-488, hsa-mir-3121, hsa-mir-1278, hsa-mir-181b-1, hsa…	C-6PJIU	C-4YYLK	chr1:150328474-249224684
UPN15	Gain	2.82	4	q35.2	p16.3	891	190889	153163	arr[hg19] 4p16.3q35.2(68,345-190,957,473)x2-3	ZNF595, ZNF718, ZNF876P, ZNF732, ZNF141, ABCA11P, ZNF721, PIGG, PDE6B, ATP5I, MYL5, MFSD7, PCGF3, LOC100129917, CPLX1, GAK, TMEM175, DGKQ, SLC26A1, IDUA, FGFRL1, RNF212, TMED11P, SPON2, LOC100130872, CTBP1, CTBP1-AS2, MAEA, UVSSA, CRIPAK, FAM53A, SLBP, TMEM129, TACC3, FGFR3, LETM1, WHSC1, SCARNA22, NELFA, MIR943, C4orf48, NAT8L, POLN, HAUS3, MXD4, MIR4800, ZFYVE28, LOC402160, RNF4, FAM193A, TNIP2…	S100P, RCHY1, FGF2, FGFR3, FIP1L1, RASSF6, CHIC2, SYNPO2, FRYL, REST, TET2, MAD2L1, NR3C2, NUDT6, FAT1, KIT, WHSC1, AFF1, NFKB1, ING2, RAP1GDS1, EIF4E, AREG, LEF1, FBXW7, SORBS2, PDGFRA, TACC3, HNRNPD, NPY1R, RASL11B, RHOH, PTPN13, MAPK10, SPP1	hsa-mir-571, ACA11, hsa-mir-943, hsa-mir-4274, hsa-mir-95, hsa-mir-548i-2, hsa-mir-3138, hsa-mir-572, hsa-mir-218-1, hsa-mir-573, hsa-mir-4275, hsa-mir-1255b-1, hsa-mir-574, HBI-6, hsa-mir-1269, hsa-mir-575, hsa-mir-1255a, hsa-mir-576, hsa-mir-297, hsa-mir-367, hsa-mir-302d, hsa-mir-302a, hsa-mir-302c, hsa-mir-302b, hsa-mir-1243, hsa-mir-577, hsa-mir-1973, ACA24, hsa-mir-2054, hsa-mir-3139, hsa-m…		C-7HDOD	chr4:68345-190957473
UPN15	Gain	2.83	5	q35.3	p15.33	1035	180606	153797	arr[hg19] 5p15.33q35.3(113,576-180,719,789)x2-3	PLEKHG4B, LRRC14B, CCDC127, SDHA, PDCD6, AHRR, C5orf55, EXOC3, PP7080, SLC9A3, MIR4456, LOC100996325, CEP72, TPPP, ZDHHC11, BRD9, TRIP13, LOC100506688, NKD2, SLC12A7, MIR4635, SLC6A19, SLC6A18, TERT, MIR4457, CLPTM1L, SLC6A3, LPCAT1, SDHAP3, LOC728613, MIR4277, MRPL36, NDUFS6, IRX4, IRX2, C5orf38, LOC285577, IRX1, LOC340094, ADAMTS16, KIAA0947, FLJ33360, MED10, UBE2QL1, LOC255167, NSUN2, SRD5A1, …	SPINK7, SEPP1, TGFBI, PDGFRB, EGR1, EBF1, HDAC3, MSH3, ACSL6, DAB2, IQGAP2, TLX3, PTTG1, LOX, SNX2, IL3, MAPK9, APC, LIFR, NPM1, GNB2L1, CCNB1, NKX2-5, FST, NR3C1, CSF1R, IL7R, RANBP17, TSLP, IRF1, AFF4, FNIP1, SSBP2, ERCC8, MEF2C, PDCD6, VCAN, CSNK1A1, GZMA, TRIO, TNIP1, NSD1, ARHGAP26, ENC1, ITK, PRLR	hsa-mir-4277, hsa-mir-4278, SNORD123, hsa-mir-887, hsa-mir-4279, hsa-mir-579, hsa-mir-580, HBII-240, hsa-mir-1274a, hsa-mir-581, hsa-mir-449a, hsa-mir-449b, hsa-mir-449c, hsa-mir-582, HBI-115, U109, hsa-mir-4280, hsa-mir-9-2, hsa-mir-2277, hsa-mir-583, hsa-mir-548p, hsa-mir-548f-3, ACA13, hsa-mir-1244-2, hsa-mir-1289-2, hsa-mir-886, hsa-mir-874, U63, U19, hsa-mir-584, hsa-mir-143, hsa-mir-145, hs…		C-6SEKW	chr5:113576-180719789
UPN15	Gain	2.82	6	q27	p25.3	1220	170763	155053	arr[hg19] 6p25.3q27(156,974-170,919,482)x2-3	DUSP22, IRF4, EXOC2, HUS1B, LOC285768, FOXQ1, FOXF2, FOXC1, GMDS, LOC100508120, C6orf195, MYLK4, WRNIP1, SERPINB1, MIR4645, MGC39372, SERPINB9, SERPINB6, DKFZP686I15217, NQO2, HTATSF1P2, RIPK1, BPHL, TUBB2A, LOC100507194, TUBB2B, PSMG4, SLC22A23, PXDC1, FAM50B, PRPF4B, FAM217A, C6orf201, ECI2, CDYL, RPP40, PPP1R3G, LYRM4, MIR3691, FARS2, NRN1, F13A1, LY86-AS1, LY86, RREB1, SSR1, CAGE1, RIOK1, DSP…	CD109, CEP85L, PPARD, CTGF, MLLT4, IGF2R, DAXX, CCND3, AHI1, BCLAF1, FOXO3, SOX4, ID4, LIN28B, CCNC, PLAGL1, FGFR1OP, SESN1, IRF4, TFAP2A, TNFAIP3, IER3, DEK, DDR1, CDKN1A, FANCE, LATS1, PRDM1, THBS2, DDX43, CITED2, BAK1, MYB, JARID2, CASP8AP2 , POLH, HIST1H2BH, WISP3, IL17A, HIST1H3F, HMGA1, EEF1A1, HFE, RUNX2, MAPK13, TFEB, ZFAND3, EPHA7, CAGE1, RNF217-AS1, hsa-mir-548a-2, AKAP12, AGER, MAP3K7,…	hsa-mir-548a-1, hsa-mir-3143, U32B, hsa-mir-877, U83, U84, ACA38, U48, U52, hsa-mir-1236, hsa-mir-219-1, hsa-mir-1275, hsa-mir-586, hsa-mir-206, hsa-mir-133b, hsa-mir-548u, hsa-mir-30c-2, hsa-mir-30a, hsa-mir-4282, U50, U50B, hsa-mir-2113, hsa-mir-587, hsa-mir-548b, hsa-mir-3144, hsa-mir-588, U101, HBII-429, ACA33, hsa-mir-548a-2, hsa-mir-3145, hsa-mir-1273c, hsa-mir-1202, ACA20, ACA29, hsa-mir-1…		C-5ELRJ	chr6:156974-170919482
UPN15	Gain	2.79	7	q36.3	q11.21	762	96672.4	95094	arr[hg19] 7q11.21q36.3(62,447,352-159,119,707)x2-3	ZNF733P, LOC100287834, LOC100287704, MIR4283-1, MIR4283-2, LOC100506050, ZNF727, ZNF735, ZNF679, ZNF736, LOC649395, ZNF680, LOC100128885, LOC641746, ZNF107, ZNF138, ZNF273, ZNF117, ERV3-1, CCT6P3, ZNF92, LOC441242, INTS4L2, CCT6P1, SNORA22, VKORC1L1, GUSB, ASL, CRCP, TPST1, LINC00174, LOC493754, KCTD7, RABGEF1, GTF2IRD1P1, TMEM248, SBDS, TYW1, MIR4650-1, MIR4650-2, PMS2P4, STAG3L4, AUTS2, WBSCR17…	POT1, NRCAM, PEX1, HSPB1, DMTF1, AKAP9, CLDN4, CREB3L2, BCL7B, MUC17, SHH, TTC26, HBP1, TRPV6, EPHA1, HGF, POM121, CAV1, ASNS, ABCB1, SPAM1, RELN, ERVW-1, TRB, STEAP2, LIMK1, EZH2, GATAD1, MET, HIP1, MNX1, STEAP1, BRAF, TAC1, TRB@, AUTS2, COL1A2, EZH2, NRF1, PEG10, POM121C, TRIM24, ZC3HAV1, EZH2, ELN, HIPK2, CDK6, EZH2	hsa-mir-4283-2, ACA22, hsa-mir-4284, hsa-mir-590, ACA14a, hsa-mir-1285-1, hsa-mir-653, hsa-mir-489, hsa-mir-591, hsa-mir-25, hsa-mir-93, hsa-mir-106b, hsa-mir-4285, hsa-mir-548o, hsa-mir-592, hsa-mir-593, hsa-mir-129-1, hsa-mir-182, hsa-mir-96, hsa-mir-183, hsa-mir-335, hsa-mir-29a, hsa-mir-29b-1, hsa-mir-490, hsa-mir-548f-4, hsa-mir-1975, hsa-mir-671, hsa-mir-153-2, hsa-mir-595	C-6ALQW	C-7IIDC	chr7:62447352-159119707
UPN15	Gain	2.87	8	q24.3	p23.3	837	146138	125254	arr[hg19] 8p23.3q24.3(158,048-146,295,771)x2-3	RPL23AP53, ZNF596, FAM87A, FBXO25, TDRP, ERICH1, ERICH1-AS1, LOC286083, DLGAP2, CLN8, MIR596, ARHGEF10, KBTBD11, MYOM2, CSMD1, LOC100287015, MCPH1, ANGPT2, AGPAT5, MIR4659A, MIR4659B, XKR5, LOC100652791, DEFB1, DEFA6, DEFA4, DEFA8P, DEFA9P, DEFA10P, DEFA1, DEFA1B, DEFT1P, DEFT1P2, DEFA3, DEFA11P, DEFA5, LINC00965, FAM66B, DEFB109P1B, USP17L1P, USP17L4, ZNF705G, DEFB4B, DEFB103B, DEFB103A, SPAG11B…	PTK2, COX6C, DEFB1, MTUS1, ASH2L, NBN, RUNX1T1, ADAM9, NDRG1, TPD52, EIF4EBP1, PSCA, TP53INP1, TNFRSF11B, BOP1, LOXL2, FGFR1, MAFA, SNAI2, NCOA2, MYC, PTK2B, WRN, WHSC1L1, HAS2, RNF139, PCM1, IDO2, NAT2, PLAG1, TACC1, PAG1, NKX3-1, ENPP2, MCPH1, TOX, MYBL1, DLC1, IDO1, KAT6A, CTHRC1, EBAG9, RECQL4, CTSB, CYP7A1, NAT1, EXT1, CYP7B1, TNKS, KIAA1967, CLU, RHOBTB2, BAALC, GGH, WWP1, RAD21	hsa-mir-596, hsa-mir-548i-3, hsa-mir-597, hsa-mir-124-1, hsa-mir-4286, hsa-mir-1322, hsa-mir-598, hsa-mir-383, hsa-mir-548v, hsa-mir-320a, hsa-mir-548h-4, hsa-mir-4287, hsa-mir-4288, hsa-mir-3148, U13, hsa-mir-486, U54, hsa-mir-124-2, HBII-276, hsa-mir-2052, hsa-mir-3149, hsa-mir-3150, U72, hsa-mir-599, hsa-mir-875, hsa-mir-1273, hsa-mir-3151, hsa-mir-548a-3, hsa-mir-2053, hsa-mir-548d-1, hsa-mir…		C-3WEHE	chr8:158048-146295771
UPN15	Gain	4	10	q26.3	p15.3	921	135327	133229	arr[hg19] 10p15.3q26.3(100,026-135,427,143)x4	ZMYND11, DIP2C, MIR5699, PRR26, LARP4B, GTPBP4, IDI2, IDI2-AS1, IDI1, WDR37, LINC00200, ADARB2, ADARB2-AS1, LINC00700, LINC00701, PFKP, PITRM1, PITRM1-AS1, KLF6, LINC00704, LINC00705, AKR1E2, AKR1C6P, AKR1C1, AKR1C2, AKR1C3, AKR1CL1, AKR1C4, UCN3, TUBAL3, NET1, CALML5, CALML3, ASB13, FAM208B, GDI2, ANKRD16, FBXO18, IL15RA, IL2RA, RBM17, PFKFB3, MIR3155A, MIR3155B, LOC399715, PRKCQ, PRKCQ-AS1, LIN…	GATA3, SIRT1, MLLT10, FGFR2, DMBT1, KLF6, BNIP3, NT5C2, LGI1, ZMIZ1, HTRA1, TLX1, ADAM12, AKR1C3, KAT6B, ERCC6, NCOA4, AIFM2, ALOX5, PDCD4, DKK1, FGF8, LDB1, BMI1, PTEN, ARID5B, NET1, BLNK, BTRC, ADD3, LOXL4, SNCG, NFKB2, TET1, EIF3A, BAG3, PSAP, MXI1, PAX2, MRC1, RHOBTB1, MAPK8, CCDC6, ABI1, RET	hsa-mir-3155, hsa-mir-548q, hsa-mir-4293, hsa-mir-1265, hsa-mir-511-1, hsa-mir-511-2, hsa-mir-1915, hsa-mir-603, hsa-mir-604, hsa-mir-938, hsa-mir-3156-1, hsa-mir-4294, hsa-mir-605, hsa-mir-548f-1, hsa-mir-1296, HBII-419, hsa-mir-1254, hsa-mir-606, hsa-mir-346, hsa-mir-107, hsa-mir-3157, hsa-mir-607, hsa-mir-1287, U108, hsa-mir-608, hsa-mir-3158-2, hsa-mir-3158-1, hsa-mir-146b, hsa-mir-1307, hsa-…	C-4CDQJ	C-5DPFD	chr10:100026-135427143
UPN15	Gain	2.85	11	q25	p15.5	1459	134708	136510	arr[hg19] 11p15.5q25(230,615-134,938,470)x2-3	SIRT3, PSMD13, NLRP6, ATHL1, IFITM5, IFITM2, IFITM1, IFITM3, B4GALNT4, PKP3, SIGIRR, ANO9, PTDSS2, RNH1, HRAS, LRRC56, C11orf35, RASSF7, MIR210HG, MIR210, LOC143666, PHRF1, IRF7, CDHR5, SCT, DRD4, DEAF1, TMEM80, EPS8L2, TALDO1, PDDC1, NS3BP, CEND1, SLC25A22, PIDD, RPLP2, SNORA52, PNPLA2, EFCAB4A, CD151, POLR2L, TSPAN4, CHID1, AP2A2, MUC6, MUC2, MUC5B, TOLLIP, TOLLIP-AS1, BRSK2, MOB2, DUSP8, KRTAP…	ARHGAP20, PTPRJ, ATM, MRE11A, CASP1, ZBTB16, FANCF, SPI1, OPCML, MUC6, KIAA1549L (C11orf41), KMT2A, CLP1, MUC2, VEGFB, LMO2, PAX6, MIR125B1, SPA17, DNAJC4, NUDT22, MLL, RAG1, DDB2, FKBP2, H2AFX, FAU, INPPL1, C11orf30, RELA, BIRC2, ORAOV1, MYEOV, CD82, NPAT, PAK1, FEN1, STIP1, CST6, RAD9A, DDX10, EIF3F, HTATIP2, PICALM, TAGLN, APLNR, PLCB3, RAG2, KAT5, GAB2, RRM1, CBL, CD248, B3GNT6, PPP1R14B, HRA…	hsa-mir-210, ACA52, hsa-mir-4298, hsa-mir-675, hsa-mir-483, ACA54, hsa-mir-302e, ACA3, ACA3-2, ACA23, U97, hsa-mir-4299, U14B, U14A, hsa-mir-3159, hsa-mir-610, hsa-mir-670, hsa-mir-129-2, hsa-mir-3160-1, hsa-mir-3160-2, HBII-166, hsa-mir-3161, hsa-mir-130a, hsa-mir-3162, hsa-mir-611, hsa-mir-1908, U99, U22, U31, U30, U29, U28, U27, U26, U25, hsa-mir-1237, hsa-mir-192, hsa-mir-194-2, hsa-mir-612, …	C-4LXKK	S-3EDHX	chr11:230615-134938470
UPN15	Gain	2.73	14	q32.33	q11.2	770	86773.8	85690	arr[hg19] 14q11.2q32.33(20,511,672-107,285,437)x2-3	OR4L1, OR4K17, OR4N5, OR11G2, OR11H6, OR11H4, TTC5, CCNB1IP1, SNORD126, RPPH1, PARP2, TEP1, KLHL33, OSGEP, APEX1, TMEM55B, PNP, RNASE10, RNASE9, RNASE11, RNASE12, OR6S1, ANG, RNASE4, EDDM3A, EDDM3B, RNASE6, RNASE1, RNASE3, ECRP, RNASE2, METTL17, SLC39A2, NDRG2, TPPP2, RNASE13, RNASE7, RNASE8, ARHGEF40, ZNF219, TMEM253, OR5AU1, LINC00641, HNRNPC, RPGRIP1, SUPT16H, CHD8, SNORD9, SNORD8, RAB2B, TOX4…	PAX9, STRN3, NIN, GPHN, PTPN21, MTA1, JAG2, SEL1L, TRA, EML1, NDRG2, SIX1, DPF3, NUMB, VRK1, MMP14, TRAF3, FOXA1, TCL6, PRKD1, NKX2-1, FUT8, IGH@, TRA@, TRD@, TSHR, ANG, XRCC3, ZFP36L1, TCL1B, AKT1, OTX2, TCL1A, DIO2, TRD, GPR68, MEG3, BCL11B, TRIP11, LGALS3, ESR2, SAV1, IGH	hsa-mir-1201, SNORD126, mgU6-53B, mgU6-53, hsa-mir-208a, hsa-mir-208b, hsa-mir-4307, hsa-mir-3171, hsa-mir-624, hsa-mir-3172, SNORD127, hsa-mir-4308, hsa-mir-548h-1, hsa-mir-625, hsa-mir-1260, ACA65, SNORA11B, hsa-mir-3173, U93, hsa-mir-342, hsa-mir-345, hsa-mir-770, hsa-mir-493, hsa-mir-337, hsa-mir-665, hsa-mir-431, hsa-mir-433, hsa-mir-127, hsa-mir-432, hsa-mir-136, 14q(0), hsa-mir-370, 14q(I-…	S-4ETOO	S-3HXYB	chr14:20511672-107285437
UPN15	Gain	2.77	17	q25.3	p13.3	1373	81041.4	73347	arr[hg19] 17p13.3q25.3(525-81,041,938)x2-3	DOC2B, RPH3AL, LOC100506388, C17orf97, FAM101B, VPS53, FAM57A, GEMIN4, DBIL5P, GLOD4, RNMTL1, NXN, TIMM22, ABR, MIR3183, BHLHA9, TUSC5, YWHAE, CRK, MYO1C, INPP5K, PITPNA-AS1, PITPNA, SLC43A2, SCARF1, RILP, PRPF8, TLCD2, MIR22HG, MIR22, WDR81, SERPINF2, SERPINF1, SMYD4, RPA1, RTN4RL1, DPH1, OVCA2, MIR132, MIR212, HIC1, SMG6, SRR, TSR1, SNORD91B, SNORD91A, SGSM2, MNT, LOC284009, METTL16, PAFAH1B1, …	ALOX12, MLLT6, HLF, CRLF3, TP53, KSR1, BRCA1, PYY, PPM1D, FAM57A, RABEP1, GSDMA, TAF15, AATF, NF1, BCAS3, SPECC1, PER1, SLC9A3R1, RPL26, USP6, SHBG, PRKAR1A, RNF213, TIMP2, XAF1, IGF2BP1, RAD51D, STARD3, GRB2, HIC1, ELAC2, RAC3, SUZ12P, ERBB2, WRAP53, CASC3, SLC4A1, CLTC, SEPT9, CLDN7, TRIM37, DDX5, AXIN2, SRSF2, ALOX15, MSI2, ASPSCR1, MIR21, GAS7, NCOR1, ETV4, IKZF3, CDC6, KDM6B, RARA, TRPV1, LA…	hsa-mir-3183, hsa-mir-22, hsa-mir-132, hsa-mir-212, HBII-296B, HBII-296A, hsa-mir-1253, hsa-mir-195, hsa-mir-497, hsa-mir-324, ACA48, mgU6-77, U67, ACA68, hsa-mir-4314, U8, hsa-mir-744, hsa-mir-548h-3, hsa-mir-1288, U49B, U49A, HBII-135, hsa-mir-33b, U3-2, U3-2B, U3-4, U3, U3-3, hsa-mir-1180, ACA59B, U42B, mgh18S-121, U42A, Z17B, hsa-mir-451, hsa-mir-144, hsa-mir-423, hsa-mir-3184, hsa-mir-193a, …	C-5VAZU	S-4LRWR	chr17:525-81041938
UPN15	Gain	2.82	18	q23	p11.32	342	77877.9	66936	arr[hg19] 18p11.32q23(136,226-78,014,123)x2-3	USP14, THOC1, COLEC12, CETN1, CLUL1, C18orf56, TYMS, ENOSF1, YES1, ADCYAP1, LINC00470, METTL4, NDC80, CBX3P2, SMCHD1, EMILIN2, LPIN2, LOC727896, MYOM1, MYL12A, MYL12B, TGIF1, DLGAP1, DLGAP1-AS1, DLGAP1-AS3, DLGAP1-AS4, DLGAP1-AS5, C18orf42, LINC00526, LINC00667, ZBTB14, EPB41L3, LOC645355, MIR3976, TMEM200C, L3MBTL4, MIR4317, LOC100130480, ARHGAP28, LINC00668, LAMA1, LRRC30, PTPRM, LOC100192426, …	SS18, MBD2, MALT1, DSG2, GATA6, PHLPP1, DCC, PTPN2, MAPK4, SMAD4, SLC39A6, BCL2, SETBP1, SMAD2, EPB41L3, RBBP8, SERPINB5, ZNF521	hsa-mir-4317, hsa-mir-3156-2, hsa-mir-320c-1, hsa-mir-133a-1, hsa-mir-1-2, hsa-mir-320c-2, hsa-mir-302f, hsa-mir-187, hsa-mir-4318, hsa-mir-924, hsa-mir-4319, hsa-mir-1539, U58C, U58A, U58B, mgU12-22/U4-8, U91, hsa-mir-4320, ACA37, hsa-mir-122	C-7KBTZ	C-6HGFA	chr18:136226-78014123
UPN15	Gain	4	21	q22.3	q11.2	293	33090.9	33620	arr[hg19] 21q11.2q22.3(15,006,457-48,097,372)x4	POTED, C21orf15, ANKRD20A11P, LIPI, RBM11, ABCC13, HSPA13, SAMSN1, SAMSN1-AS1, LOC388813, NRIP1, USP25, LINC00478, MIR99A, MIRLET7C, MIR125B2, C21orf37, CXADR, BTG3, C21orf91-OT1, C21orf91, CHODL-AS1, CHODL, TMPRSS15, LINC00320, NCAM2, RNU6-67P, LINC00317, LINC00308, D21S2088E, LOC339622, LINC00158, MIR155HG, MIR155, LINC00515, MRPL39, JAM2, ATP5J, GABPA, APP, CYYR1, ADAMTS1, ADAMTS5, MIR4759, MI…	U2AF1, PTTG1IP, TIAM1, MIR125B2, OLIG2, CSTB, ADAMTS1, NRIP1, TFF3, TFF2, TMPRSS3, ERG, ETS2, DYRK1A, TFF1, TMPRSS2, RUNX1, S100B	hsa-mir-3118-5, hsa-mir-99a, hsa-let-7c, hsa-mir-125b-2, hsa-mir-548x, hsa-mir-155, hsa-mir-4327, ACA67, hsa-mir-802, hsa-mir-3197	C-6OPRF	C-3ELOA	chr21:15006457-48097372
UPN15	Gain	3	X	q28	p22.33	1020	155065	189818	arr[hg19] Xp22.33q28(168,546-155,233,731)x3	PLCXD1, GTPBP6, LINC00685, PPP2R3B, SHOX, CRLF2, CSF2RA, MIR3690, IL3RA, SLC25A6, ASMTL-AS1, ASMTL, P2RY8, AKAP17A, ASMT, DHRSX, ZBED1, CD99P1, LINC00102, CD99, XG, XGPY2, GYG2, ARSD, ARSE, ARSH, ARSF, CXorf28, MXRA5, PRKX, LOC389906, NLGN4X, MIR4770, VCX3A, HDHD1, MIR4767, STS, VCX, PNPLA4, MIR651, VCX2, VCX3B, KAL1, FAM9A, FAM9B, TBL1X, GPR143, SHROOM2, LOC100288814, WWC3, CLCN4, MID1, HCCS, AR…	PHF6, RPL10, GATA1, GPC3, DKC1, DACH2, MIR221, L1CAM, STAG2, ARMCX1, IL3RA, CXCR3, MTCP1, SEPT6, FOXP3, FAM123B, NONO, RBBP7, RHOXF2, ZRSR2, ARMCX3, MSN, P2RY8, AIFM1, ARMCX2, KDM6A, ELF4, REPS2, Sep.06, SSX2, BRWD3, ZBTB33, TFE3, MIR222, AR, BTK, AMOT, BCOR, FOXO4, SPANXA1, CRLF2	hsa-mir-651, hsa-mir-1308, ACA12, hsa-mir-548f-5, hsa-mir-221, hsa-mir-222, SNORA11C, hsa-mir-532, hsa-mir-188, hsa-mir-500, hsa-mir-362, hsa-mir-501, hsa-mir-500b, hsa-mir-660, hsa-mir-502, SNORA11E, SNORA11D, hsa-mir-98, hsa-let-7f-2, U107, hsa-mir-1468, hsa-mir-223, hsa-mir-421, hsa-mir-374b, hsa-mir-545, hsa-mir-374a, hsa-mir-384, hsa-mir-325, hsa-mir-4328, hsa-mir-548i-4, hsa-mir-1321, hsa-m…	C-5QGHR	C-6KTXX	chrX:168546-155233731
UPN15	Gain	3	22	q12.2	q12.2	1	0.824	28	arr[hg19] 22q12.2(30,086,971-30,087,795)x3	NF2	NF2		C-7BCPR	C-5FBVA	chr22:30086971-30087795
UPN16	Loss	1	8	q12.1	q12.1	1	88.145	52	arr[hg19] 8q12.1(60,028,851-60,116,996)x1	TOX	TOX		C-3UEBV	C-4IVSY	chr8:60028851-60116996
UPN16	Loss	1	16	q22.1	q22.1	2	37.1	36	arr[hg19] 16q22.1(67,568,694-67,605,794)x1	FAM65A, CTCF	FAM65A, CTCF		C-7MZSH	S-3OQIQ	chr16:67568694-67605794
UPN16	Gain	2.9	4	q35.2	p16.3	891	190889	153163	arr[hg19] 4p16.3q35.2(68,345-190,957,473)x2-3	ZNF595, ZNF718, ZNF876P, ZNF732, ZNF141, ABCA11P, ZNF721, PIGG, PDE6B, ATP5I, MYL5, MFSD7, PCGF3, LOC100129917, CPLX1, GAK, TMEM175, DGKQ, SLC26A1, IDUA, FGFRL1, RNF212, TMED11P, SPON2, LOC100130872, CTBP1, CTBP1-AS2, MAEA, UVSSA, CRIPAK, FAM53A, SLBP, TMEM129, TACC3, FGFR3, LETM1, WHSC1, SCARNA22, NELFA, MIR943, C4orf48, NAT8L, POLN, HAUS3, MXD4, MIR4800, ZFYVE28, LOC402160, RNF4, FAM193A, TNIP2…	S100P, RCHY1, FGF2, FGFR3, FIP1L1, RASSF6, CHIC2, SYNPO2, FRYL, REST, TET2, MAD2L1, NR3C2, NUDT6, FAT1, KIT, WHSC1, AFF1, NFKB1, ING2, RAP1GDS1, EIF4E, AREG, LEF1, FBXW7, SORBS2, PDGFRA, TACC3, HNRNPD, NPY1R, RASL11B, RHOH, PTPN13, MAPK10, SPP1	hsa-mir-571, ACA11, hsa-mir-943, hsa-mir-4274, hsa-mir-95, hsa-mir-548i-2, hsa-mir-3138, hsa-mir-572, hsa-mir-218-1, hsa-mir-573, hsa-mir-4275, hsa-mir-1255b-1, hsa-mir-574, HBI-6, hsa-mir-1269, hsa-mir-575, hsa-mir-1255a, hsa-mir-576, hsa-mir-297, hsa-mir-367, hsa-mir-302d, hsa-mir-302a, hsa-mir-302c, hsa-mir-302b, hsa-mir-1243, hsa-mir-577, hsa-mir-1973, ACA24, hsa-mir-2054, hsa-mir-3139, hsa-m…		C-7HDOD	chr4:68345-190957473
UPN16	Gain	2.88	6	q27	p25.3	1220	170763	155053	arr[hg19] 6p25.3q27(156,974-170,919,482)x2-3	DUSP22, IRF4, EXOC2, HUS1B, LOC285768, FOXQ1, FOXF2, FOXC1, GMDS, LOC100508120, C6orf195, MYLK4, WRNIP1, SERPINB1, MIR4645, MGC39372, SERPINB9, SERPINB6, DKFZP686I15217, NQO2, HTATSF1P2, RIPK1, BPHL, TUBB2A, LOC100507194, TUBB2B, PSMG4, SLC22A23, PXDC1, FAM50B, PRPF4B, FAM217A, C6orf201, ECI2, CDYL, RPP40, PPP1R3G, LYRM4, MIR3691, FARS2, NRN1, F13A1, LY86-AS1, LY86, RREB1, SSR1, CAGE1, RIOK1, DSP…	CD109, CEP85L, PPARD, CTGF, MLLT4, IGF2R, DAXX, CCND3, AHI1, BCLAF1, FOXO3, SOX4, ID4, LIN28B, CCNC, PLAGL1, FGFR1OP, SESN1, IRF4, TFAP2A, TNFAIP3, IER3, DEK, DDR1, CDKN1A, FANCE, LATS1, PRDM1, THBS2, DDX43, CITED2, BAK1, MYB, JARID2, CASP8AP2 , POLH, HIST1H2BH, WISP3, IL17A, HIST1H3F, HMGA1, EEF1A1, HFE, RUNX2, MAPK13, TFEB, ZFAND3, EPHA7, CAGE1, RNF217-AS1, hsa-mir-548a-2, AKAP12, AGER, MAP3K7,…	hsa-mir-548a-1, hsa-mir-3143, U32B, hsa-mir-877, U83, U84, ACA38, U48, U52, hsa-mir-1236, hsa-mir-219-1, hsa-mir-1275, hsa-mir-586, hsa-mir-206, hsa-mir-133b, hsa-mir-548u, hsa-mir-30c-2, hsa-mir-30a, hsa-mir-4282, U50, U50B, hsa-mir-2113, hsa-mir-587, hsa-mir-548b, hsa-mir-3144, hsa-mir-588, U101, HBII-429, ACA33, hsa-mir-548a-2, hsa-mir-3145, hsa-mir-1273c, hsa-mir-1202, ACA20, ACA29, hsa-mir-1…		C-5ELRJ	chr6:156974-170919482
UPN16	Gain	3	10	q26.3	p15.3	921	135283	133181	arr[hg19] 10p15.3q26.3(144,089-135,427,143)x3	ZMYND11, DIP2C, MIR5699, PRR26, LARP4B, GTPBP4, IDI2, IDI2-AS1, IDI1, WDR37, LINC00200, ADARB2, ADARB2-AS1, LINC00700, LINC00701, PFKP, PITRM1, PITRM1-AS1, KLF6, LINC00704, LINC00705, AKR1E2, AKR1C6P, AKR1C1, AKR1C2, AKR1C3, AKR1CL1, AKR1C4, UCN3, TUBAL3, NET1, CALML5, CALML3, ASB13, FAM208B, GDI2, ANKRD16, FBXO18, IL15RA, IL2RA, RBM17, PFKFB3, MIR3155A, MIR3155B, LOC399715, PRKCQ, PRKCQ-AS1, LIN…	GATA3, SIRT1, MLLT10, FGFR2, DMBT1, KLF6, BNIP3, NT5C2, LGI1, ZMIZ1, HTRA1, TLX1, ADAM12, AKR1C3, KAT6B, ERCC6, NCOA4, AIFM2, ALOX5, PDCD4, DKK1, FGF8, LDB1, BMI1, PTEN, ARID5B, NET1, BLNK, BTRC, ADD3, LOXL4, SNCG, NFKB2, TET1, EIF3A, BAG3, PSAP, MXI1, PAX2, MRC1, RHOBTB1, MAPK8, CCDC6, ABI1, RET	hsa-mir-3155, hsa-mir-548q, hsa-mir-4293, hsa-mir-1265, hsa-mir-511-1, hsa-mir-511-2, hsa-mir-1915, hsa-mir-603, hsa-mir-604, hsa-mir-938, hsa-mir-3156-1, hsa-mir-4294, hsa-mir-605, hsa-mir-548f-1, hsa-mir-1296, HBII-419, hsa-mir-1254, hsa-mir-606, hsa-mir-346, hsa-mir-107, hsa-mir-3157, hsa-mir-607, hsa-mir-1287, U108, hsa-mir-608, hsa-mir-3158-2, hsa-mir-3158-1, hsa-mir-146b, hsa-mir-1307, hsa-…		C-5DPFD	chr10:144089-135427143
UPN16	Gain	2.93	14	q32.33	q11.2	770	86773.8	85690	arr[hg19] 14q11.2q32.33(20,511,672-107,285,437)x2-3	OR4L1, OR4K17, OR4N5, OR11G2, OR11H6, OR11H4, TTC5, CCNB1IP1, SNORD126, RPPH1, PARP2, TEP1, KLHL33, OSGEP, APEX1, TMEM55B, PNP, RNASE10, RNASE9, RNASE11, RNASE12, OR6S1, ANG, RNASE4, EDDM3A, EDDM3B, RNASE6, RNASE1, RNASE3, ECRP, RNASE2, METTL17, SLC39A2, NDRG2, TPPP2, RNASE13, RNASE7, RNASE8, ARHGEF40, ZNF219, TMEM253, OR5AU1, LINC00641, HNRNPC, RPGRIP1, SUPT16H, CHD8, SNORD9, SNORD8, RAB2B, TOX4…	PAX9, STRN3, NIN, GPHN, PTPN21, MTA1, JAG2, SEL1L, TRA, EML1, NDRG2, SIX1, DPF3, NUMB, VRK1, MMP14, TRAF3, FOXA1, TCL6, PRKD1, NKX2-1, FUT8, IGH@, TRA@, TRD@, TSHR, ANG, XRCC3, ZFP36L1, TCL1B, AKT1, OTX2, TCL1A, DIO2, TRD, GPR68, MEG3, BCL11B, TRIP11, LGALS3, ESR2, SAV1, IGH	hsa-mir-1201, SNORD126, mgU6-53B, mgU6-53, hsa-mir-208a, hsa-mir-208b, hsa-mir-4307, hsa-mir-3171, hsa-mir-624, hsa-mir-3172, SNORD127, hsa-mir-4308, hsa-mir-548h-1, hsa-mir-625, hsa-mir-1260, ACA65, SNORA11B, hsa-mir-3173, U93, hsa-mir-342, hsa-mir-345, hsa-mir-770, hsa-mir-493, hsa-mir-337, hsa-mir-665, hsa-mir-431, hsa-mir-433, hsa-mir-127, hsa-mir-432, hsa-mir-136, 14q(0), hsa-mir-370, 14q(I-…		S-3HXYB	chr14:20511672-107285437
UPN16	Gain	2.86	15	q26.3	q11.2	807	79658.7	81561	arr[hg19] 15q11.2q26.3(22,770,421-102,429,112)x2-3	TUBGCP5, CYFIP1, NIPA2, NIPA1, LOC283683, WHAMMP3, GOLGA8I, HERC2P2, HERC2P7, GOLGA8EP, LOC440243, GOLGA8S, MIR4508, MKRN3, MAGEL2, NDN, PWRN2, PWRN1, NPAP1, SNRPN, SNURF, SNORD107, PWARSN, PWAR5, SNORD64, SNORD108, SNORD109A, SNORD109B, SNORD116-1, SNORD116-2, SNORD116-3, SNORD116-9, SNORD116-4, SNORD116-5, SNORD116-7, SNORD116-6, SNORD116-8, SNORD116-10, SNORD116-11, SNORD116-12, SNORD116-13, S…	MAPK6, KIAA0101, TCF12, ITGA11, IDH2, ADAM10, ITPKA, SHC4, BLM, LTK, UBE3A, PML, CTSH, BUB1B, CASC5, IGF1R, SPINT1, NEIL1, THBS1, GOLGA6A, RASGRF1, TYRO3, GCNT3, COPS2, SPRED1, PLCB2, BMF, hsa-mir-626, ATP10A, TRPM1, PKM2, NTRK3, C15orf55	HBII-436, HBII-13, HBII-437, HBII-438A, HBII-85-1, HBII-85-2, HBII-85-3, HBII-85-4, HBII-85-5, HBII-85-6, HBII-85-7, HBII-85-8, HBII-85-9, HBII-85-10, HBII-85-11, HBII-85-12, HBII-85-13, HBII-85-14, HBII-85-15, HBII-85-16, HBII-85-17, HBII-85-18, HBII-85-19, HBII-85-20, HBII-85-21, HBII-85-22, HBII-85-23, HBII-85-24, HBII-85-25, HBII-85-26, HBII-85-27, HBII-85-28, HBII-85-29, HBII-52-1, HBII-52-2…		C-4JXEO	chr15:22770421-102429112
UPN16	Gain	2.88	17	q25.3	p13.3	1373	81041.4	73347	arr[hg19] 17p13.3q25.3(525-81,041,938)x2-3	DOC2B, RPH3AL, LOC100506388, C17orf97, FAM101B, VPS53, FAM57A, GEMIN4, DBIL5P, GLOD4, RNMTL1, NXN, TIMM22, ABR, MIR3183, BHLHA9, TUSC5, YWHAE, CRK, MYO1C, INPP5K, PITPNA-AS1, PITPNA, SLC43A2, SCARF1, RILP, PRPF8, TLCD2, MIR22HG, MIR22, WDR81, SERPINF2, SERPINF1, SMYD4, RPA1, RTN4RL1, DPH1, OVCA2, MIR132, MIR212, HIC1, SMG6, SRR, TSR1, SNORD91B, SNORD91A, SGSM2, MNT, LOC284009, METTL16, PAFAH1B1, …	ALOX12, MLLT6, HLF, CRLF3, TP53, KSR1, BRCA1, PYY, PPM1D, FAM57A, RABEP1, GSDMA, TAF15, AATF, NF1, BCAS3, SPECC1, PER1, SLC9A3R1, RPL26, USP6, SHBG, PRKAR1A, RNF213, TIMP2, XAF1, IGF2BP1, RAD51D, STARD3, GRB2, HIC1, ELAC2, RAC3, SUZ12P, ERBB2, WRAP53, CASC3, SLC4A1, CLTC, SEPT9, CLDN7, TRIM37, DDX5, AXIN2, SRSF2, ALOX15, MSI2, ASPSCR1, MIR21, GAS7, NCOR1, ETV4, IKZF3, CDC6, KDM6B, RARA, TRPV1, LA…	hsa-mir-3183, hsa-mir-22, hsa-mir-132, hsa-mir-212, HBII-296B, HBII-296A, hsa-mir-1253, hsa-mir-195, hsa-mir-497, hsa-mir-324, ACA48, mgU6-77, U67, ACA68, hsa-mir-4314, U8, hsa-mir-744, hsa-mir-548h-3, hsa-mir-1288, U49B, U49A, HBII-135, hsa-mir-33b, U3-2, U3-2B, U3-4, U3, U3-3, hsa-mir-1180, ACA59B, U42B, mgh18S-121, U42A, Z17B, hsa-mir-451, hsa-mir-144, hsa-mir-423, hsa-mir-3184, hsa-mir-193a, …		S-4LRWR	chr17:525-81041938
UPN16	Gain	2.89	18	q23	p11.32	342	77877.9	66936	arr[hg19] 18p11.32q23(136,226-78,014,123)x2-3	USP14, THOC1, COLEC12, CETN1, CLUL1, C18orf56, TYMS, ENOSF1, YES1, ADCYAP1, LINC00470, METTL4, NDC80, CBX3P2, SMCHD1, EMILIN2, LPIN2, LOC727896, MYOM1, MYL12A, MYL12B, TGIF1, DLGAP1, DLGAP1-AS1, DLGAP1-AS3, DLGAP1-AS4, DLGAP1-AS5, C18orf42, LINC00526, LINC00667, ZBTB14, EPB41L3, LOC645355, MIR3976, TMEM200C, L3MBTL4, MIR4317, LOC100130480, ARHGAP28, LINC00668, LAMA1, LRRC30, PTPRM, LOC100192426, …	SS18, MBD2, MALT1, DSG2, GATA6, PHLPP1, DCC, PTPN2, MAPK4, SMAD4, SLC39A6, BCL2, SETBP1, SMAD2, EPB41L3, RBBP8, SERPINB5, ZNF521	hsa-mir-4317, hsa-mir-3156-2, hsa-mir-320c-1, hsa-mir-133a-1, hsa-mir-1-2, hsa-mir-320c-2, hsa-mir-302f, hsa-mir-187, hsa-mir-4318, hsa-mir-924, hsa-mir-4319, hsa-mir-1539, U58C, U58A, U58B, mgU12-22/U4-8, U91, hsa-mir-4320, ACA37, hsa-mir-122		C-6HGFA	chr18:136226-78014123
UPN16	Gain	4	21	q22.3	q11.2	293	33090.9	33620	arr[hg19] 21q11.2q22.3(15,006,457-48,097,372)x4	POTED, C21orf15, ANKRD20A11P, LIPI, RBM11, ABCC13, HSPA13, SAMSN1, SAMSN1-AS1, LOC388813, NRIP1, USP25, LINC00478, MIR99A, MIRLET7C, MIR125B2, C21orf37, CXADR, BTG3, C21orf91-OT1, C21orf91, CHODL-AS1, CHODL, TMPRSS15, LINC00320, NCAM2, RNU6-67P, LINC00317, LINC00308, D21S2088E, LOC339622, LINC00158, MIR155HG, MIR155, LINC00515, MRPL39, JAM2, ATP5J, GABPA, APP, CYYR1, ADAMTS1, ADAMTS5, MIR4759, MI…	U2AF1, PTTG1IP, TIAM1, MIR125B2, OLIG2, CSTB, ADAMTS1, NRIP1, TFF3, TFF2, TMPRSS3, ERG, ETS2, DYRK1A, TFF1, TMPRSS2, RUNX1, S100B	hsa-mir-3118-5, hsa-mir-99a, hsa-let-7c, hsa-mir-125b-2, hsa-mir-548x, hsa-mir-155, hsa-mir-4327, ACA67, hsa-mir-802, hsa-mir-3197		C-3ELOA	chr21:15006457-48097372
UPN16	Gain	3	X	q28	p22.33	1020	155065	189818	arr[hg19] Xp22.33q28(168,546-155,233,731)x3	PLCXD1, GTPBP6, LINC00685, PPP2R3B, SHOX, CRLF2, CSF2RA, MIR3690, IL3RA, SLC25A6, ASMTL-AS1, ASMTL, P2RY8, AKAP17A, ASMT, DHRSX, ZBED1, CD99P1, LINC00102, CD99, XG, XGPY2, GYG2, ARSD, ARSE, ARSH, ARSF, CXorf28, MXRA5, PRKX, LOC389906, NLGN4X, MIR4770, VCX3A, HDHD1, MIR4767, STS, VCX, PNPLA4, MIR651, VCX2, VCX3B, KAL1, FAM9A, FAM9B, TBL1X, GPR143, SHROOM2, LOC100288814, WWC3, CLCN4, MID1, HCCS, AR…	PHF6, RPL10, GATA1, GPC3, DKC1, DACH2, MIR221, L1CAM, STAG2, ARMCX1, IL3RA, CXCR3, MTCP1, SEPT6, FOXP3, FAM123B, NONO, RBBP7, RHOXF2, ZRSR2, ARMCX3, MSN, P2RY8, AIFM1, ARMCX2, KDM6A, ELF4, REPS2, Sep.06, SSX2, BRWD3, ZBTB33, TFE3, MIR222, AR, BTK, AMOT, BCOR, FOXO4, SPANXA1, CRLF2	hsa-mir-651, hsa-mir-1308, ACA12, hsa-mir-548f-5, hsa-mir-221, hsa-mir-222, SNORA11C, hsa-mir-532, hsa-mir-188, hsa-mir-500, hsa-mir-362, hsa-mir-501, hsa-mir-500b, hsa-mir-660, hsa-mir-502, SNORA11E, SNORA11D, hsa-mir-98, hsa-let-7f-2, U107, hsa-mir-1468, hsa-mir-223, hsa-mir-421, hsa-mir-374b, hsa-mir-545, hsa-mir-374a, hsa-mir-384, hsa-mir-325, hsa-mir-4328, hsa-mir-548i-4, hsa-mir-1321, hsa-m…		C-6KTXX	chrX:168546-155233731
UPN16	Loss	1	20	p12.2	p12.2	1	27.088	47	arr[hg19] 20p12.2(10,444,531-10,471,619)x1	SLX4IP	C20orf94		C-5UUTO	S-4QMLY	chr20:10444531-10471619
UPPN17	Gain	3	10	q26.3	p15.3	921	133229	135327	arr[hg19] 10p15.3q26.3(100,026-135,427,143)x3	ZMYND11, DIP2C, MIR5699, PRR26, LARP4B, GTPBP4, IDI2, IDI2-AS1, IDI1, WDR37, LINC00200, ADARB2, ADARB2-AS1, LINC00700, LINC00701, PFKP, PITRM1, PITRM1-AS1, KLF6, LINC00704, LINC00705, AKR1E2, AKR1C6P, AKR1C1, AKR1C2, AKR1C3, AKR1CL1, AKR1C4, UCN3, TUBAL3, NET1, CALML5, CALML3, ASB13, FAM208B, GDI2, ANKRD16, FBXO18, IL15RA, IL2RA, RBM17, PFKFB3, MIR3155A, MIR3155B, LOC399715, PRKCQ, PRKCQ-AS1, LIN…	ALOX5, LOXL4, CCDC6, TET1, RET, MAPK8, RHOBTB1, GATA3, NCOA4, BAG3, ABI1, SNCG, ZMIZ1, KLF6, AKR1C3, KAT6B, TLX1, PDCD4, ADAM12, NT5C2, ERCC6, LDB1, NET1, ADD3, AIFM2, ARID5B, MRC1, MLLT10, NFKB2, FGF8, PAX2, SIRT1, DKK1, LGI1, FGFR2, BMI1, BLNK, PTEN, MXI1, BNIP3, PSAP, BTRC, DMBT1, EIF3A, HTRA1	hsa-mir-3155, hsa-mir-548q, hsa-mir-4293, hsa-mir-1265, hsa-mir-511-1, hsa-mir-511-2, hsa-mir-1915, hsa-mir-603, hsa-mir-604, hsa-mir-938, hsa-mir-3156-1, hsa-mir-4294, hsa-mir-605, hsa-mir-548f-1, hsa-mir-1296, HBII-419, hsa-mir-1254, hsa-mir-606, hsa-mir-346, hsa-mir-107, hsa-mir-3157, hsa-mir-607, hsa-mir-1287, U108, hsa-mir-608, hsa-mir-3158-1, hsa-mir-3158-2, hsa-mir-146b, hsa-mir-1307, hsa-…		C-5DPFD	chr10:100026-135427143
UPPN17	Gain	3	6	q27	p25.3	1220	155053	170763	arr[hg19] 6p25.3q27(156,974-170,919,482)x3	DUSP22, IRF4, EXOC2, HUS1B, LOC285768, FOXQ1, FOXF2, FOXC1, GMDS, LOC100508120, C6orf195, MYLK4, WRNIP1, SERPINB1, MIR4645, MGC39372, SERPINB9, SERPINB6, DKFZP686I15217, NQO2, HTATSF1P2, RIPK1, BPHL, TUBB2A, LOC100507194, TUBB2B, PSMG4, SLC22A23, PXDC1, FAM50B, PRPF4B, FAM217A, C6orf201, ECI2, CDYL, RPP40, PPP1R3G, LYRM4, MIR3691, FARS2, NRN1, F13A1, LY86-AS1, LY86, RREB1, SSR1, CAGE1, RIOK1, DSP…	CAGE1, ECT2L, MAPK14, MAPK13, PRDM1, WISP3, MYB, DDR1, CD109, CITED2, PPARD, SESN1, E2F3, PLAGL1, POLH, EEF1A1, CDKN1A, SMAP1, hsa-mir-548a-2, IER3, BAK1, TFEB, DEK, IL17A, CEP85L, BACH2, TFAP2A, DAXX, IGF2R, IRF4, FOXO3, RUNX2, HIST1H4F, RNASET2, ARMC2, AGER, BCLAF1, MLLT4, SOX4, FGFR1OP, ZFAND3, CASP8AP2 , ID4, MAP3K7, RNF217-AS1, TNF, HDAC2, HIST1H3F, LATS1, PIM1, DDX43, NFKBIE, HIST1H2BH, EPH…	hsa-mir-548a-1, hsa-mir-3143, U32B, hsa-mir-877, U83, U84, ACA38, U48, U52, hsa-mir-1236, hsa-mir-219-1, hsa-mir-1275, hsa-mir-586, hsa-mir-206, hsa-mir-133b, hsa-mir-548u, hsa-mir-30c-2, hsa-mir-30a, hsa-mir-4282, U50, U50B, hsa-mir-2113, hsa-mir-587, hsa-mir-548b, hsa-mir-3144, hsa-mir-588, U101, HBII-429, ACA33, hsa-mir-548a-2, hsa-mir-3145, hsa-mir-1273c, hsa-mir-1202, ACA20, ACA29, hsa-mir-1…		C-5ELRJ	chr6:156974-170919482
UPPN17	Gain	4	14	q32.33	q11.2	770	85690	86773.8	arr[hg19] 14q11.2q32.33(20,511,672-107,285,437)x4	OR4L1, OR4K17, OR4N5, OR11G2, OR11H6, OR11H4, TTC5, CCNB1IP1, SNORD126, RPPH1, PARP2, TEP1, KLHL33, OSGEP, APEX1, TMEM55B, PNP, RNASE10, RNASE9, RNASE11, RNASE12, OR6S1, ANG, RNASE4, EDDM3A, EDDM3B, RNASE6, RNASE1, RNASE3, ECRP, RNASE2, METTL17, SLC39A2, NDRG2, TPPP2, RNASE13, RNASE7, RNASE8, ARHGEF40, ZNF219, TMEM253, OR5AU1, LINC00641, HNRNPC, RPGRIP1, SUPT16H, CHD8, SNORD9, SNORD8, RAB2B, TOX4…	FOXA1, SIX1, TRIP11, XRCC3, NKX2-1, SAV1, ZFP36L1, TCL6, NUMB, DPF3, TCL1B, GPHN, MEG3, PRKD1, TRD@, OTX2, ESR2, TRD, TRA, PTPN21, PAX9, TSHR, TRAF3, GPR68, STRN3, NIN, TCL1A, SEL1L, LGALS3, IGH@, NDRG2, EML1, FUT8, MTA1, VRK1, TRA@, AKT1, JAG2, BCL11B, DIO2, ANG, MMP14, IGH	hsa-mir-1201, SNORD126, mgU6-53B, mgU6-53, hsa-mir-208a, hsa-mir-208b, hsa-mir-4307, hsa-mir-3171, hsa-mir-624, hsa-mir-3172, SNORD127, hsa-mir-4308, hsa-mir-548h-1, hsa-mir-625, hsa-mir-1260, ACA65, SNORA11B, hsa-mir-3173, U93, hsa-mir-342, hsa-mir-345, hsa-mir-770, hsa-mir-493, hsa-mir-337, hsa-mir-665, hsa-mir-431, hsa-mir-433, hsa-mir-127, hsa-mir-432, hsa-mir-136, 14q(0), hsa-mir-370, 14q(I-…		S-3HXYB	chr14:20511672-107285437
UPPN17	Gain	3	8	q24.3	p23.3	837	125254	146138	arr[hg19] 8p23.3q24.3(158,048-146,295,771)x3	RPL23AP53, ZNF596, FAM87A, FBXO25, TDRP, ERICH1, ERICH1-AS1, LOC286083, DLGAP2, CLN8, MIR596, ARHGEF10, KBTBD11, MYOM2, CSMD1, LOC100287015, MCPH1, ANGPT2, AGPAT5, MIR4659A, MIR4659B, XKR5, LOC100652791, DEFB1, DEFA6, DEFA4, DEFA8P, DEFA9P, DEFA10P, DEFA1, DEFA1B, DEFT1P, DEFT1P2, DEFA3, DEFA11P, DEFA5, LINC00965, FAM66B, DEFB109P1B, USP17L1P, USP17L4, ZNF705G, DEFB4B, DEFB103B, DEFB103A, SPAG11B…	MAFA, CYP7B1, PLAG1, GGH, PCM1, MCPH1, RUNX1T1, EXT1, TPD52, TP53INP1, BAALC, NAT2, ADAM9, MYBL1, HAS2, TNFRSF11B, LOXL2, WRN, IDO1, KIAA1967, NCOA2, NDRG1, PSCA, CLU, SNAI2, NBN, ENPP2, ASH2L, WWP1, PTK2, CYP7A1, RHOBTB2, DEFB1, TACC1, CTSB, COX6C, PTK2B, RNF139, MYC, NKX3-1, TNKS, EIF4EBP1, CTHRC1, NAT1, RECQL4, KAT6A, EBAG9, FGFR1, RAD21, DLC1, TOX, PAG1, BOP1, MTUS1, IDO2, WHSC1L1	hsa-mir-596, hsa-mir-548i-3, hsa-mir-597, hsa-mir-124-1, hsa-mir-4286, hsa-mir-1322, hsa-mir-598, hsa-mir-383, hsa-mir-548v, hsa-mir-320a, hsa-mir-548h-4, hsa-mir-4287, hsa-mir-4288, hsa-mir-3148, U13, hsa-mir-486, U54, hsa-mir-124-2, HBII-276, hsa-mir-2052, hsa-mir-3149, hsa-mir-3150, U72, hsa-mir-599, hsa-mir-875, hsa-mir-1273, hsa-mir-3151, hsa-mir-548a-3, hsa-mir-2053, hsa-mir-548d-1, hsa-mir…		C-3WEHE	chr8:158048-146295771
UPPN17	Gain	2	X	q28	p22.33	1020	189818	155065	arr[hg19] Xp22.33q28(168,546-155,233,731)x2	PLCXD1, GTPBP6, LINC00685, PPP2R3B, SHOX, CRLF2, CSF2RA, MIR3690, IL3RA, SLC25A6, ASMTL-AS1, ASMTL, P2RY8, AKAP17A, ASMT, DHRSX, ZBED1, CD99P1, LINC00102, CD99, XG, XGPY2, GYG2, ARSD, ARSE, ARSH, ARSF, CXorf28, MXRA5, PRKX, LOC389906, NLGN4X, MIR4770, VCX3A, HDHD1, MIR4767, STS, VCX, PNPLA4, MIR651, VCX2, VCX3B, KAL1, FAM9A, FAM9B, TBL1X, GPR143, SHROOM2, LOC100288814, WWC3, CLCN4, MID1, HCCS, AR…	MTCP1, CRLF2, BRWD3, PHF6, MIR221, RPL10, RHOXF2, TFE3, MSN, GPC3, AMOT, SSX2, SPANXA1, FAM123B, ARMCX3, BTK, ELF4, GATA1, ZBTB33, FOXO4, RBBP7, DACH2, AIFM1, NONO, Sep.06, ARMCX2, STAG2, DKC1, IL3RA, CXCR3, REPS2, KDM6A, L1CAM, SEPT6, AR, ZRSR2, BCOR, FOXP3, ARMCX1, MIR222, P2RY8	hsa-mir-651, hsa-mir-1308, ACA12, hsa-mir-548f-5, hsa-mir-221, hsa-mir-222, SNORA11C, hsa-mir-532, hsa-mir-188, hsa-mir-500, hsa-mir-362, hsa-mir-501, hsa-mir-500b, hsa-mir-660, hsa-mir-502, SNORA11E, SNORA11D, hsa-mir-98, hsa-let-7f-2, U107, hsa-mir-1468, hsa-mir-223, hsa-mir-421, hsa-mir-374b, hsa-mir-545, hsa-mir-374a, hsa-mir-384, hsa-mir-325, hsa-mir-4328, hsa-mir-548i-4, hsa-mir-1321, hsa-m…		C-6KTXX	chrX:168546-155233731
UPPN17	Gain	4	21	q22.3	q11.2	293	33620	33090.9	arr[hg19] 21q11.2q22.3(15,006,457-48,097,372)x4	POTED, C21orf15, ANKRD20A11P, LIPI, RBM11, ABCC13, HSPA13, SAMSN1, SAMSN1-AS1, LOC388813, NRIP1, USP25, LINC00478, MIR99A, MIRLET7C, MIR125B2, C21orf37, CXADR, BTG3, C21orf91-OT1, C21orf91, CHODL-AS1, CHODL, TMPRSS15, LINC00320, NCAM2, RNU6-67P, LINC00317, LINC00308, D21S2088E, LOC339622, LINC00158, MIR155HG, MIR155, LINC00515, MRPL39, JAM2, ATP5J, GABPA, APP, CYYR1, ADAMTS1, ADAMTS5, MIR4759, MI…	PTTG1IP, U2AF1, MIR125B2, TFF2, DYRK1A, ERG, TMPRSS2, TMPRSS3, OLIG2, ADAMTS1, TFF1, TIAM1, CSTB, NRIP1, ETS2, RUNX1, S100B, TFF3	hsa-mir-3118-5, hsa-mir-99a, hsa-let-7c, hsa-mir-125b-2, hsa-mir-548x, hsa-mir-155, hsa-mir-4327, ACA67, hsa-mir-802, hsa-mir-3197		C-3ELOA	chr21:15006457-48097372
UPPN17	Gain	3	17	q25.3	p13.3	1373	73347	81041.4	arr[hg19] 17p13.3q25.3(525-81,041,938)x3	DOC2B, RPH3AL, LOC100506388, C17orf97, FAM101B, VPS53, FAM57A, GEMIN4, DBIL5P, GLOD4, RNMTL1, NXN, TIMM22, ABR, MIR3183, BHLHA9, TUSC5, YWHAE, CRK, MYO1C, INPP5K, PITPNA-AS1, PITPNA, SLC43A2, SCARF1, RILP, PRPF8, TLCD2, MIR22HG, MIR22, WDR81, SERPINF2, SERPINF1, SMYD4, RPA1, RTN4RL1, DPH1, OVCA2, MIR132, MIR212, HIC1, SMG6, SRR, TSR1, SNORD91B, SNORD91A, SGSM2, MNT, LOC284009, METTL16, PAFAH1B1, …	TBX2, ALOX12, ERBB2, SLC4A1, PYY, HLF, LASP1, PPP1R1B, DLX4, MLLT6, RECQL5, KDM6B, SLC16A3, NCOR1, IKZF3, ASPSCR1, GSDMA, XAF1, SEPT9, ALOX15, CLDN7, AATF, CDC6, NMT1, CLTC, HIC1, GAST, USP6, TP53, SHBG, BRCA1, RNF213, WRAP53, PPM1D, DDX5, GRN, STARD3, ELAC2, BCAS3, SUZ12, TRAF4, SRSF2, RAD51D, TAF15, RARA, ETV4, GRB2, ENPP7, FAM57A, RABEP1, NF1, PRKAR1A, ST6GALNAC1, MAPK7, GAS7, RPL26, IGF2BP1, …	hsa-mir-3183, hsa-mir-22, hsa-mir-132, hsa-mir-212, HBII-296B, HBII-296A, hsa-mir-1253, hsa-mir-195, hsa-mir-497, hsa-mir-324, ACA48, mgU6-77, U67, ACA68, hsa-mir-4314, U8, hsa-mir-744, hsa-mir-548h-3, hsa-mir-1288, U49B, U49A, HBII-135, hsa-mir-33b, U3-2, U3-2B, U3-4, U3, U3-3, hsa-mir-1180, ACA59B, U42B, mgh18S-121, U42A, Z17B, hsa-mir-451, hsa-mir-144, hsa-mir-423, hsa-mir-3184, hsa-mir-193a, …		S-4LRWR	chr17:525-81041938
UPPN17	Gain	3	1	p31.3	p31.3	1	36	13.301	arr[hg19] 1p31.3(65,313,147-65,326,448)x3	JAK1	JAK1		C-3UQVJ	C-7GACK	chr1:65313147-65326448
UPN18	Loss	1	6	p22.2	p22.2	16	140.317	120	arr[hg19] 6p22.2(26,125,350-26,265,667)x1	HIST1H1E, HIST1H2BD, HIST1H2BE, HIST1H4D, HIST1H3D, HIST1H2AD, HIST1H2BF, HIST1H4E, HIST1H2BG, HIST1H2AE, HIST1H3E, HIST1H1D, HIST1H4F, HIST1H4G, HIST1H3F, HIST1H2BH	HIST1H2BH, HIST1H3F, HIST1H4G, HIST1H4F		C-6FRMR	C-4LKXF	chr6:26125350-26265667
UPN18	Loss	1	12	p13.2	p13.31	85	4089.98	4284	arr[hg19] 12p13.31p13.2(8,250,723-12,340,703)x1	CLEC4A, POU5F1P3, ZNF705A, FAM66C, FAM90A1, FAM86FP, LINC00937, CLEC6A, CLEC4D, CLEC4E, AICDA, MFAP5, RIMKLB, A2ML1, PHC1, M6PR, KLRG1, LINC00612, A2M-AS1, A2M, PZP, A2MP1, MIR1244-1, MIR1244-2, MIR1244-3, LOC100499405, LOC642846, DDX12P, KLRB1, LOC374443, CLEC2D, CLECL1, CD69, KLRF1, CLEC2B, KLRF2, CLEC2A, CLEC12A, CLEC1B, CLEC12B, CLEC9A, CLEC1A, CLEC7A, OLR1, TMEM52B, GABARAPL1, KLRD1, KLRK1, …	GABARAPL1, KLRK1, BCL2L14, ETV6	hsa-mir-1244-3	C-6XTYB	C-4RBSW	chr12:8250723-12340703
UPN18	Loss	1	19	p13.3	p13.3	168	4620.58	1584	arr[hg19] 19p13.3(260,911-4,881,494)x1	PPAP2C, MIER2, THEG, C2CD4C, SHC2, ODF3L2, MADCAM1, TPGS1, CDC34, GZMM, BSG, HCN2, POLRMT, FGF22, RNF126, FSTL3, PRSS57, PALM, MISP, PTBP1, MIR4745, LPPR3, MIR3187, AZU1, PRTN3, ELANE, CFD, MED16, R3HDM4, KISS1R, ARID3A, WDR18, GRIN3B, TMEM259, CNN2, ABCA7, HMHA1, POLR2E, GPX4, SBNO2, STK11, C19orf26, ATP5D, MIDN, CIRBP-AS1, CIRBP, C19orf24, EFNA2, MUM1, NDUFS7, GAMT, DAZAP1, RPS15, APC2, C19orf2…	TCF3, ZBTB7A, SH3GL1, GNA11, STK11, FSTL3	hsa-mir-3187, hsa-mir-1909, hsa-mir-1227, hsa-mir-4321, hsa-mir-637, U37, hsa-mir-7-3	S-4CJRO	C-4ZBTA	chr19:260911-4881494
UPN18	Gain	2.85	1	q44	q21.2	1073	99579.7	101733	arr[hg19] 1q21.2q44(149,644,939-249,224,684)x2-3	LINC00869, HIST2H2BF, FCGR1A, HIST2H3D, HIST2H4A, HIST2H4B, HIST2H3C, HIST2H3A, HIST2H2AA4, HIST2H2AA3, HIST2H2BC, HIST2H2BE, HIST2H2AC, HIST2H2AB, BOLA1, SV2A, SF3B4, MTMR11, OTUD7B, VPS45, PLEKHO1, ANP32E, CA14, APH1A, C1orf54, C1orf51, MRPS21, PRPF3, RPRD2, TARS2, ECM1, LINC00568, ADAMTSL4, MIR4257, MCL1, ENSA, GOLPH3L, HORMAD1, CTSS, CTSK, ARNT, SETDB1, CERS2, ANXA9, FAM63A, PRUNE, BNIPL, C1o…	CREG1, FCGR2B, EGLN1, MAPKAPK2, RCSD1, ADIPOR1, PTPRC, CRTC2, SHC1, PRCC, CKS1B, ATF3, S100A10, KCNH1, CENPF, GAS5, ABL2, IGSF8, SMYD3, MEF2D, SMYD2, PLA2G4A, S100A1, RPS27, PBX1, TNFSF18, PVRL4, PRRX1, TP53BP2, CDC73, DUSP10, RGS2, PTPN7, S100A4, ASPM, S100A13, DHX9, TPM3, ARHGEF2, S100A9, MIXL1, TPR, ENAH, PTGS2, USF1, MLLT11, GLRX2, ESRRG, SDHC, AKT3, PSEN2, ARNT, S100A8, ECM1, TNN, B3GALT2, S…	hsa-mir-4257, hsa-mir-554, hsa-mir-190b, hsa-mir-4258, hsa-mir-92b, hsa-mir-555, ACA42, ACA26, hsa-mir-9-1, hsa-mir-765, hsa-mir-4259, hsa-mir-556, hsa-mir-921, hsa-mir-1255b-2, hsa-mir-557, hsa-mir-3119-1, hsa-mir-3119-2, hsa-mir-1295, hsa-mir-214, hsa-mir-3120, hsa-mir-199a-2, U81, U47, U80, U79, U78, U44, U77, U76, U75, U74, HBI-100, hsa-mir-488, hsa-mir-3121, hsa-mir-1278, hsa-mir-181b-1, hsa…		C-4YYLK	chr1:149644939-249224684
UPN18	Gain	2.87	4	q35.2	p16.3	891	190889	153163	arr[hg19] 4p16.3q35.2(68,345-190,957,473)x2-3	ZNF595, ZNF718, ZNF876P, ZNF732, ZNF141, ABCA11P, ZNF721, PIGG, PDE6B, ATP5I, MYL5, MFSD7, PCGF3, LOC100129917, CPLX1, GAK, TMEM175, DGKQ, SLC26A1, IDUA, FGFRL1, RNF212, TMED11P, SPON2, LOC100130872, CTBP1, CTBP1-AS2, MAEA, UVSSA, CRIPAK, FAM53A, SLBP, TMEM129, TACC3, FGFR3, LETM1, WHSC1, SCARNA22, NELFA, MIR943, C4orf48, NAT8L, POLN, HAUS3, MXD4, MIR4800, ZFYVE28, LOC402160, RNF4, FAM193A, TNIP2…	S100P, RCHY1, FGF2, FGFR3, FIP1L1, RASSF6, CHIC2, SYNPO2, FRYL, REST, TET2, MAD2L1, NR3C2, NUDT6, FAT1, KIT, WHSC1, AFF1, NFKB1, ING2, RAP1GDS1, EIF4E, AREG, LEF1, FBXW7, SORBS2, PDGFRA, TACC3, HNRNPD, NPY1R, RASL11B, RHOH, PTPN13, MAPK10, SPP1	hsa-mir-571, ACA11, hsa-mir-943, hsa-mir-4274, hsa-mir-95, hsa-mir-548i-2, hsa-mir-3138, hsa-mir-572, hsa-mir-218-1, hsa-mir-573, hsa-mir-4275, hsa-mir-1255b-1, hsa-mir-574, HBI-6, hsa-mir-1269, hsa-mir-575, hsa-mir-1255a, hsa-mir-576, hsa-mir-297, hsa-mir-367, hsa-mir-302d, hsa-mir-302a, hsa-mir-302c, hsa-mir-302b, hsa-mir-1243, hsa-mir-577, hsa-mir-1973, ACA24, hsa-mir-2054, hsa-mir-3139, hsa-m…		C-7HDOD	chr4:68345-190957473
UPN18	Gain	3	6	p22.2	p25.3	156	25968.4	26248	arr[hg19] 6p25.3p22.2(156,974-26,125,350)x3	DUSP22, IRF4, EXOC2, HUS1B, LOC285768, FOXQ1, FOXF2, FOXC1, GMDS, LOC100508120, C6orf195, MYLK4, WRNIP1, SERPINB1, MIR4645, MGC39372, SERPINB9, SERPINB6, DKFZP686I15217, NQO2, HTATSF1P2, RIPK1, BPHL, TUBB2A, LOC100507194, TUBB2B, PSMG4, SLC22A23, PXDC1, FAM50B, PRPF4B, FAM217A, C6orf201, ECI2, CDYL, RPP40, PPP1R3G, LYRM4, MIR3691, FARS2, NRN1, F13A1, LY86-AS1, LY86, RREB1, SSR1, CAGE1, RIOK1, DSP…	SOX4, ID4, IRF4, TFAP2A, DEK, JARID2, HFE, CAGE1, E2F3	hsa-mir-548a-1	C-3GOBV	C-6KXMH	chr6:156974-26125350
UPN18	Gain	3	6	q27	p22.2	1048	144654	128685	arr[hg19] 6p22.2q27(26,265,714-170,919,482)x3	HIST1H3G, HIST1H2BI, HIST1H4H, BTN3A2, BTN2A2, BTN3A1, BTN2A3P, BTN3A3, BTN2A1, LOC285819, BTN1A1, HCG11, HMGN4, ABT1, ZNF322, GUSBP2, LINC00240, LOC100270746, HIST1H2BJ, HIST1H2AG, HIST1H2BK, HIST1H4I, HIST1H2AH, MIR3143, PRSS16, POM121L2, VN1R10P, ZNF204P, ZNF391, ZNF184, LOC100507173, LOC100131289, HIST1H2BL, HIST1H2AI, HIST1H3H, HIST1H2AJ, HIST1H2BM, HIST1H4J, HIST1H4K, HIST1H2AK, HIST1H2BN, …	CD109, CEP85L, PPARD, CTGF, MLLT4, IGF2R, DAXX, CCND3, AHI1, BCLAF1, FOXO3, LIN28B, CCNC, PLAGL1, FGFR1OP, SESN1, TNFAIP3, IER3, DDR1, CDKN1A, FANCE, LATS1, PRDM1, THBS2, DDX43, CITED2, BAK1, MYB, CASP8AP2 , POLH, WISP3, IL17A, HMGA1, EEF1A1, RUNX2, MAPK13, TFEB, ZFAND3, EPHA7, RNF217-AS1, hsa-mir-548a-2, AKAP12, AGER, MAP3K7, HDAC2, PIM1, ARMC2, MAPK14, NFKBIE, RNASET2, TNF, ECT2L, SMAP1, LTA, B…	hsa-mir-3143, U32B, hsa-mir-877, U83, U84, ACA38, U48, U52, hsa-mir-1236, hsa-mir-219-1, hsa-mir-1275, hsa-mir-586, hsa-mir-206, hsa-mir-133b, hsa-mir-548u, hsa-mir-30c-2, hsa-mir-30a, hsa-mir-4282, U50, U50B, hsa-mir-2113, hsa-mir-587, hsa-mir-548b, hsa-mir-3144, hsa-mir-588, U101, HBII-429, ACA33, hsa-mir-548a-2, hsa-mir-3145, hsa-mir-1273c, hsa-mir-1202, ACA20, ACA29, hsa-mir-1913		C-5ELRJ	chr6:26265714-170919482
UPN18	Gain	2.89	10	q26.3	p15.3	921	135327	133229	arr[hg19] 10p15.3q26.3(100,026-135,427,143)x2-3	ZMYND11, DIP2C, MIR5699, PRR26, LARP4B, GTPBP4, IDI2, IDI2-AS1, IDI1, WDR37, LINC00200, ADARB2, ADARB2-AS1, LINC00700, LINC00701, PFKP, PITRM1, PITRM1-AS1, KLF6, LINC00704, LINC00705, AKR1E2, AKR1C6P, AKR1C1, AKR1C2, AKR1C3, AKR1CL1, AKR1C4, UCN3, TUBAL3, NET1, CALML5, CALML3, ASB13, FAM208B, GDI2, ANKRD16, FBXO18, IL15RA, IL2RA, RBM17, PFKFB3, MIR3155A, MIR3155B, LOC399715, PRKCQ, PRKCQ-AS1, LIN…	GATA3, SIRT1, MLLT10, FGFR2, DMBT1, KLF6, BNIP3, NT5C2, LGI1, ZMIZ1, HTRA1, TLX1, ADAM12, AKR1C3, KAT6B, ERCC6, NCOA4, AIFM2, ALOX5, PDCD4, DKK1, FGF8, LDB1, BMI1, PTEN, ARID5B, NET1, BLNK, BTRC, ADD3, LOXL4, SNCG, NFKB2, TET1, EIF3A, BAG3, PSAP, MXI1, PAX2, MRC1, RHOBTB1, MAPK8, CCDC6, ABI1, RET	hsa-mir-3155, hsa-mir-548q, hsa-mir-4293, hsa-mir-1265, hsa-mir-511-1, hsa-mir-511-2, hsa-mir-1915, hsa-mir-603, hsa-mir-604, hsa-mir-938, hsa-mir-3156-1, hsa-mir-4294, hsa-mir-605, hsa-mir-548f-1, hsa-mir-1296, HBII-419, hsa-mir-1254, hsa-mir-606, hsa-mir-346, hsa-mir-107, hsa-mir-3157, hsa-mir-607, hsa-mir-1287, U108, hsa-mir-608, hsa-mir-3158-2, hsa-mir-3158-1, hsa-mir-146b, hsa-mir-1307, hsa-…		C-5DPFD	chr10:100026-135427143
UPN18	Gain	2.84	14	q32.33	q11.2	770	86773.8	85690	arr[hg19] 14q11.2q32.33(20,511,672-107,285,437)x2-3	OR4L1, OR4K17, OR4N5, OR11G2, OR11H6, OR11H4, TTC5, CCNB1IP1, SNORD126, RPPH1, PARP2, TEP1, KLHL33, OSGEP, APEX1, TMEM55B, PNP, RNASE10, RNASE9, RNASE11, RNASE12, OR6S1, ANG, RNASE4, EDDM3A, EDDM3B, RNASE6, RNASE1, RNASE3, ECRP, RNASE2, METTL17, SLC39A2, NDRG2, TPPP2, RNASE13, RNASE7, RNASE8, ARHGEF40, ZNF219, TMEM253, OR5AU1, LINC00641, HNRNPC, RPGRIP1, SUPT16H, CHD8, SNORD9, SNORD8, RAB2B, TOX4…	PAX9, STRN3, NIN, GPHN, PTPN21, MTA1, JAG2, SEL1L, TRA, EML1, NDRG2, SIX1, DPF3, NUMB, VRK1, MMP14, TRAF3, FOXA1, TCL6, PRKD1, NKX2-1, FUT8, IGH@, TRA@, TRD@, TSHR, ANG, XRCC3, ZFP36L1, TCL1B, AKT1, OTX2, TCL1A, DIO2, TRD, GPR68, MEG3, BCL11B, TRIP11, LGALS3, ESR2, SAV1, IGH	hsa-mir-1201, SNORD126, mgU6-53B, mgU6-53, hsa-mir-208a, hsa-mir-208b, hsa-mir-4307, hsa-mir-3171, hsa-mir-624, hsa-mir-3172, SNORD127, hsa-mir-4308, hsa-mir-548h-1, hsa-mir-625, hsa-mir-1260, ACA65, SNORA11B, hsa-mir-3173, U93, hsa-mir-342, hsa-mir-345, hsa-mir-770, hsa-mir-493, hsa-mir-337, hsa-mir-665, hsa-mir-431, hsa-mir-433, hsa-mir-127, hsa-mir-432, hsa-mir-136, 14q(0), hsa-mir-370, 14q(I-…		S-3HXYB	chr14:20511672-107285437
UPN18	Gain	2.88	17	q25.3	p13.3	1373	81041.4	73347	arr[hg19] 17p13.3q25.3(525-81,041,938)x2-3	DOC2B, RPH3AL, LOC100506388, C17orf97, FAM101B, VPS53, FAM57A, GEMIN4, DBIL5P, GLOD4, RNMTL1, NXN, TIMM22, ABR, MIR3183, BHLHA9, TUSC5, YWHAE, CRK, MYO1C, INPP5K, PITPNA-AS1, PITPNA, SLC43A2, SCARF1, RILP, PRPF8, TLCD2, MIR22HG, MIR22, WDR81, SERPINF2, SERPINF1, SMYD4, RPA1, RTN4RL1, DPH1, OVCA2, MIR132, MIR212, HIC1, SMG6, SRR, TSR1, SNORD91B, SNORD91A, SGSM2, MNT, LOC284009, METTL16, PAFAH1B1, …	ALOX12, MLLT6, HLF, CRLF3, TP53, KSR1, BRCA1, PYY, PPM1D, FAM57A, RABEP1, GSDMA, TAF15, AATF, NF1, BCAS3, SPECC1, PER1, SLC9A3R1, RPL26, USP6, SHBG, PRKAR1A, RNF213, TIMP2, XAF1, IGF2BP1, RAD51D, STARD3, GRB2, HIC1, ELAC2, RAC3, SUZ12P, ERBB2, WRAP53, CASC3, SLC4A1, CLTC, SEPT9, CLDN7, TRIM37, DDX5, AXIN2, SRSF2, ALOX15, MSI2, ASPSCR1, MIR21, GAS7, NCOR1, ETV4, IKZF3, CDC6, KDM6B, RARA, TRPV1, LA…	hsa-mir-3183, hsa-mir-22, hsa-mir-132, hsa-mir-212, HBII-296B, HBII-296A, hsa-mir-1253, hsa-mir-195, hsa-mir-497, hsa-mir-324, ACA48, mgU6-77, U67, ACA68, hsa-mir-4314, U8, hsa-mir-744, hsa-mir-548h-3, hsa-mir-1288, U49B, U49A, HBII-135, hsa-mir-33b, U3-2, U3-2B, U3-4, U3, U3-3, hsa-mir-1180, ACA59B, U42B, mgh18S-121, U42A, Z17B, hsa-mir-451, hsa-mir-144, hsa-mir-423, hsa-mir-3184, hsa-mir-193a, …		S-4LRWR	chr17:525-81041938
UPN18	Gain	2.88	18	q23	p11.32	342	77877.9	66936	arr[hg19] 18p11.32q23(136,226-78,014,123)x2-3	USP14, THOC1, COLEC12, CETN1, CLUL1, C18orf56, TYMS, ENOSF1, YES1, ADCYAP1, LINC00470, METTL4, NDC80, CBX3P2, SMCHD1, EMILIN2, LPIN2, LOC727896, MYOM1, MYL12A, MYL12B, TGIF1, DLGAP1, DLGAP1-AS1, DLGAP1-AS3, DLGAP1-AS4, DLGAP1-AS5, C18orf42, LINC00526, LINC00667, ZBTB14, EPB41L3, LOC645355, MIR3976, TMEM200C, L3MBTL4, MIR4317, LOC100130480, ARHGAP28, LINC00668, LAMA1, LRRC30, PTPRM, LOC100192426, …	SS18, MBD2, MALT1, DSG2, GATA6, PHLPP1, DCC, PTPN2, MAPK4, SMAD4, SLC39A6, BCL2, SETBP1, SMAD2, EPB41L3, RBBP8, SERPINB5, ZNF521	hsa-mir-4317, hsa-mir-3156-2, hsa-mir-320c-1, hsa-mir-133a-1, hsa-mir-1-2, hsa-mir-320c-2, hsa-mir-302f, hsa-mir-187, hsa-mir-4318, hsa-mir-924, hsa-mir-4319, hsa-mir-1539, U58C, U58A, U58B, mgU12-22/U4-8, U91, hsa-mir-4320, ACA37, hsa-mir-122		C-6HGFA	chr18:136226-78014123
UPN18	Gain	4	21	q22.3	q11.2	293	33090.9	33620	arr[hg19] 21q11.2q22.3(15,006,457-48,097,372)x4	POTED, C21orf15, ANKRD20A11P, LIPI, RBM11, ABCC13, HSPA13, SAMSN1, SAMSN1-AS1, LOC388813, NRIP1, USP25, LINC00478, MIR99A, MIRLET7C, MIR125B2, C21orf37, CXADR, BTG3, C21orf91-OT1, C21orf91, CHODL-AS1, CHODL, TMPRSS15, LINC00320, NCAM2, RNU6-67P, LINC00317, LINC00308, D21S2088E, LOC339622, LINC00158, MIR155HG, MIR155, LINC00515, MRPL39, JAM2, ATP5J, GABPA, APP, CYYR1, ADAMTS1, ADAMTS5, MIR4759, MI…	U2AF1, PTTG1IP, TIAM1, MIR125B2, OLIG2, CSTB, ADAMTS1, NRIP1, TFF3, TFF2, TMPRSS3, ERG, ETS2, DYRK1A, TFF1, TMPRSS2, RUNX1, S100B	hsa-mir-3118-5, hsa-mir-99a, hsa-let-7c, hsa-mir-125b-2, hsa-mir-548x, hsa-mir-155, hsa-mir-4327, ACA67, hsa-mir-802, hsa-mir-3197		C-3ELOA	chr21:15006457-48097372
UPN18	Gain	3	22	q13.33	q13.33	2	7.582	51	arr[hg19] 22q13.33(50,966,729-50,974,311)x3	TYMP, ODF3B	TYMP		C-3OPLB	C-3ZOSB	chr22:50966729-50974311
UPN18	Gain	3	13	q33.3	q33.2	7	2134.03	2184	arr[hg19] 13q33.2q33.3(106,402,723-108,536,758)x3	LINC00343, LINC00460, EFNB2, ARGLU1, LINC00551, LINC00443, FAM155A		hsa-mir-1267	C-7OEDP	S-3TOGA	chr13:106402723-108536758
UPN19	LOH		1	p35.2	p36.11	63	3699.8	520	arr[hg19] 1p36.11p35.2(26,715,231-30,415,026) hmz	LIN28A, DHDDS, HMGN2, RPS6KA1, MIR1976, ARID1A, PIGV, ZDHHC18, SFN, GPN2, GPATCH3, NR0B2, NUDC, C1orf172, TRNP1, FAM46B, SLC9A1, WDTC1, TMEM222, LOC644961, SYTL1, MAP3K6, FCN3, CD164L2, GPR3, WASF2, AHDC1, FGR, IFI6, FAM76A, STX12, PPP1R8, SCARNA1, THEMIS2, RPA2, SMPDL3B, XKR8, EYA3, PTAFR, DNAJC8, ATPIF1, SESN2, MED18, PHACTR4, SNHG3, RCC1, TRNAU1AP, SNHG12, SNORD99, SNORA61, SNORA44, SNORA16A, …	RPA2, RPS6KA1, PPP1R8	hsa-mir-1976, ACA35, U17a, U17b, HBII-420, ACA61, ACA44, ACA16	S-3PAZM	S-3FRYQ	chr1:26715231-30415026
UPN19	LOH		15	q22.31	q22.2	45	3118.65	639	arr[hg19] 15q22.2q22.31(63,433,765-66,552,416) hmz	LACTB, RPS27L, RAB8B, APH1B, CA12, USP3, USP3-AS1, FBXL22, HERC1, DAPK2, FAM96A, SNX1, SNX22, PPIB, CSNK1G1, KIAA0101, TRIP4, ZNF609, OAZ2, RBPMS2, MIR1272, PIF1, PLEKHO2, ANKDD1A, SPG21, MTFMT, SLC51B, RASL12, KBTBD13, UBAP1L, PDCD7, CLPX, CILP, PARP16, IGDCC3, IGDCC4, DPP8, PTPLAD1, VWA9, SLC24A1, DENND4A, MIR4511, RAB11A, MEGF11, MIR4311	KIAA0101	hsa-mir-422a, hsa-mir-1272, hsa-mir-4311	S-3IMHT	S-3UEXC	chr15:63433765-66552416
UPN19	Gain	2.86	1	q41	q21.1	867	71585.1	69265	arr[hg19] 1q21.1q41(144,274,995-215,860,071)x2-3	LOC100288142, LINC00623, LOC728875, PPIAL4B, PPIAL4C, PPIAL4A, PFN1P2, NBPF8, NBPF9, LOC653513, PDE4DIP, SEC22B, NOTCH2NL, NBPF10, HFE2, TXNIP, POLR3GL, ANKRD34A, LIX1L, RBM8A, GNRHR2, PEX11B, ITGA10, ANKRD35, PIAS3, NUDT17, POLR3C, RNF115, CD160, PDZK1, GPR89A, GPR89C, PDZK1P1, NBPF24, NBPF11, HYDIN2, NBPF12, LOC728989, NBPF13P, PRKAB2, PDIA3P, FMO5, CHD1L, LINC00624, BCL9, ACP6, GJA5, GJA8, GPR…	CREG1, FCGR2B, MAPKAPK2, RCSD1, ADIPOR1, PTPRC, CRTC2, SHC1, PRCC, CKS1B, ATF3, S100A10, BCL9, PIAS3, KCNH1, CENPF, GAS5, ABL2, IGSF8, MEF2D, SMYD2, PLA2G4A, S100A1, RPS27, PBX1, TNFSF18, PVRL4, PRRX1, CDC73, RGS2, PTPN7, S100A4, ASPM, S100A13, DHX9, TPM3, ARHGEF2, S100A9, TPR, PTGS2, USF1, MLLT11, GLRX2, SDHC, ARNT, S100A8, PDE4DIP, ECM1, TNN, B3GALT2, S100A7, TROVE2, SELE, KIF14, GPA33	hsa-mir-4257, hsa-mir-554, hsa-mir-190b, hsa-mir-4258, hsa-mir-92b, hsa-mir-555, ACA42, ACA26, hsa-mir-9-1, hsa-mir-765, hsa-mir-4259, hsa-mir-556, hsa-mir-921, hsa-mir-1255b-2, hsa-mir-557, hsa-mir-3119-1, hsa-mir-3119-2, hsa-mir-1295, hsa-mir-214, hsa-mir-3120, hsa-mir-199a-2, U81, U47, U80, U79, U78, U44, U77, U76, U75, U74, HBI-100, hsa-mir-488, hsa-mir-3121, hsa-mir-1278, hsa-mir-181b-1, hsa…	C-3ZDWY	S-3TTHH	chr1:144274995-215860071
UPN19	Gain	2.88	4	q35.2	p16.3	891	190889	153163	arr[hg19] 4p16.3q35.2(68,345-190,957,473)x2-3	ZNF595, ZNF718, ZNF876P, ZNF732, ZNF141, ABCA11P, ZNF721, PIGG, PDE6B, ATP5I, MYL5, MFSD7, PCGF3, LOC100129917, CPLX1, GAK, TMEM175, DGKQ, SLC26A1, IDUA, FGFRL1, RNF212, TMED11P, SPON2, LOC100130872, CTBP1, CTBP1-AS2, MAEA, UVSSA, CRIPAK, FAM53A, SLBP, TMEM129, TACC3, FGFR3, LETM1, WHSC1, SCARNA22, NELFA, MIR943, C4orf48, NAT8L, POLN, HAUS3, MXD4, MIR4800, ZFYVE28, LOC402160, RNF4, FAM193A, TNIP2…	S100P, RCHY1, FGF2, FGFR3, FIP1L1, RASSF6, CHIC2, SYNPO2, FRYL, REST, TET2, MAD2L1, NR3C2, NUDT6, FAT1, KIT, WHSC1, AFF1, NFKB1, ING2, RAP1GDS1, EIF4E, AREG, LEF1, FBXW7, SORBS2, PDGFRA, TACC3, HNRNPD, NPY1R, RASL11B, RHOH, PTPN13, MAPK10, SPP1	hsa-mir-571, ACA11, hsa-mir-943, hsa-mir-4274, hsa-mir-95, hsa-mir-548i-2, hsa-mir-3138, hsa-mir-572, hsa-mir-218-1, hsa-mir-573, hsa-mir-4275, hsa-mir-1255b-1, hsa-mir-574, HBI-6, hsa-mir-1269, hsa-mir-575, hsa-mir-1255a, hsa-mir-576, hsa-mir-297, hsa-mir-367, hsa-mir-302d, hsa-mir-302a, hsa-mir-302c, hsa-mir-302b, hsa-mir-1243, hsa-mir-577, hsa-mir-1973, ACA24, hsa-mir-2054, hsa-mir-3139, hsa-m…		C-7HDOD	chr4:68345-190957473
UPN19	Gain	2.9	6	q27	p25.3	1220	170763	155053	arr[hg19] 6p25.3q27(156,974-170,919,482)x2-3	DUSP22, IRF4, EXOC2, HUS1B, LOC285768, FOXQ1, FOXF2, FOXC1, GMDS, LOC100508120, C6orf195, MYLK4, WRNIP1, SERPINB1, MIR4645, MGC39372, SERPINB9, SERPINB6, DKFZP686I15217, NQO2, HTATSF1P2, RIPK1, BPHL, TUBB2A, LOC100507194, TUBB2B, PSMG4, SLC22A23, PXDC1, FAM50B, PRPF4B, FAM217A, C6orf201, ECI2, CDYL, RPP40, PPP1R3G, LYRM4, MIR3691, FARS2, NRN1, F13A1, LY86-AS1, LY86, RREB1, SSR1, CAGE1, RIOK1, DSP…	CD109, CEP85L, PPARD, CTGF, MLLT4, IGF2R, DAXX, CCND3, AHI1, BCLAF1, FOXO3, SOX4, ID4, LIN28B, CCNC, PLAGL1, FGFR1OP, SESN1, IRF4, TFAP2A, TNFAIP3, IER3, DEK, DDR1, CDKN1A, FANCE, LATS1, PRDM1, THBS2, DDX43, CITED2, BAK1, MYB, JARID2, CASP8AP2 , POLH, HIST1H2BH, WISP3, IL17A, HIST1H3F, HMGA1, EEF1A1, HFE, RUNX2, MAPK13, TFEB, ZFAND3, EPHA7, CAGE1, RNF217-AS1, hsa-mir-548a-2, AKAP12, AGER, MAP3K7,…	hsa-mir-548a-1, hsa-mir-3143, U32B, hsa-mir-877, U83, U84, ACA38, U48, U52, hsa-mir-1236, hsa-mir-219-1, hsa-mir-1275, hsa-mir-586, hsa-mir-206, hsa-mir-133b, hsa-mir-548u, hsa-mir-30c-2, hsa-mir-30a, hsa-mir-4282, U50, U50B, hsa-mir-2113, hsa-mir-587, hsa-mir-548b, hsa-mir-3144, hsa-mir-588, U101, HBII-429, ACA33, hsa-mir-548a-2, hsa-mir-3145, hsa-mir-1273c, hsa-mir-1202, ACA20, ACA29, hsa-mir-1…		C-5ELRJ	chr6:156974-170919482
UPN19	Gain	2.92	10	q26.3	p15.3	921	135327	133229	arr[hg19] 10p15.3q26.3(100,026-135,427,143)x2-3	ZMYND11, DIP2C, MIR5699, PRR26, LARP4B, GTPBP4, IDI2, IDI2-AS1, IDI1, WDR37, LINC00200, ADARB2, ADARB2-AS1, LINC00700, LINC00701, PFKP, PITRM1, PITRM1-AS1, KLF6, LINC00704, LINC00705, AKR1E2, AKR1C6P, AKR1C1, AKR1C2, AKR1C3, AKR1CL1, AKR1C4, UCN3, TUBAL3, NET1, CALML5, CALML3, ASB13, FAM208B, GDI2, ANKRD16, FBXO18, IL15RA, IL2RA, RBM17, PFKFB3, MIR3155A, MIR3155B, LOC399715, PRKCQ, PRKCQ-AS1, LIN…	GATA3, SIRT1, MLLT10, FGFR2, DMBT1, KLF6, BNIP3, NT5C2, LGI1, ZMIZ1, HTRA1, TLX1, ADAM12, AKR1C3, KAT6B, ERCC6, NCOA4, AIFM2, ALOX5, PDCD4, DKK1, FGF8, LDB1, BMI1, PTEN, ARID5B, NET1, BLNK, BTRC, ADD3, LOXL4, SNCG, NFKB2, TET1, EIF3A, BAG3, PSAP, MXI1, PAX2, MRC1, RHOBTB1, MAPK8, CCDC6, ABI1, RET	hsa-mir-3155, hsa-mir-548q, hsa-mir-4293, hsa-mir-1265, hsa-mir-511-1, hsa-mir-511-2, hsa-mir-1915, hsa-mir-603, hsa-mir-604, hsa-mir-938, hsa-mir-3156-1, hsa-mir-4294, hsa-mir-605, hsa-mir-548f-1, hsa-mir-1296, HBII-419, hsa-mir-1254, hsa-mir-606, hsa-mir-346, hsa-mir-107, hsa-mir-3157, hsa-mir-607, hsa-mir-1287, U108, hsa-mir-608, hsa-mir-3158-2, hsa-mir-3158-1, hsa-mir-146b, hsa-mir-1307, hsa-…	C-4CDQJ	C-5DPFD	chr10:100026-135427143
UPN19	Gain	2.89	14	q32.33	q11.2	770	86773.8	85690	arr[hg19] 14q11.2q32.33(20,511,672-107,285,437)x2-3	OR4L1, OR4K17, OR4N5, OR11G2, OR11H6, OR11H4, TTC5, CCNB1IP1, SNORD126, RPPH1, PARP2, TEP1, KLHL33, OSGEP, APEX1, TMEM55B, PNP, RNASE10, RNASE9, RNASE11, RNASE12, OR6S1, ANG, RNASE4, EDDM3A, EDDM3B, RNASE6, RNASE1, RNASE3, ECRP, RNASE2, METTL17, SLC39A2, NDRG2, TPPP2, RNASE13, RNASE7, RNASE8, ARHGEF40, ZNF219, TMEM253, OR5AU1, LINC00641, HNRNPC, RPGRIP1, SUPT16H, CHD8, SNORD9, SNORD8, RAB2B, TOX4…	PAX9, STRN3, NIN, GPHN, PTPN21, MTA1, JAG2, SEL1L, TRA, EML1, NDRG2, SIX1, DPF3, NUMB, VRK1, MMP14, TRAF3, FOXA1, TCL6, PRKD1, NKX2-1, FUT8, IGH@, TRA@, TRD@, TSHR, ANG, XRCC3, ZFP36L1, TCL1B, AKT1, OTX2, TCL1A, DIO2, TRD, GPR68, MEG3, BCL11B, TRIP11, LGALS3, ESR2, SAV1, IGH	hsa-mir-1201, SNORD126, mgU6-53B, mgU6-53, hsa-mir-208a, hsa-mir-208b, hsa-mir-4307, hsa-mir-3171, hsa-mir-624, hsa-mir-3172, SNORD127, hsa-mir-4308, hsa-mir-548h-1, hsa-mir-625, hsa-mir-1260, ACA65, SNORA11B, hsa-mir-3173, U93, hsa-mir-342, hsa-mir-345, hsa-mir-770, hsa-mir-493, hsa-mir-337, hsa-mir-665, hsa-mir-431, hsa-mir-433, hsa-mir-127, hsa-mir-432, hsa-mir-136, 14q(0), hsa-mir-370, 14q(I-…	S-4ETOO	S-3HXYB	chr14:20511672-107285437
UPN19	Gain	2.86	17	q25.3	p13.3	1373	81041.4	73347	arr[hg19] 17p13.3q25.3(525-81,041,938)x2-3	DOC2B, RPH3AL, LOC100506388, C17orf97, FAM101B, VPS53, FAM57A, GEMIN4, DBIL5P, GLOD4, RNMTL1, NXN, TIMM22, ABR, MIR3183, BHLHA9, TUSC5, YWHAE, CRK, MYO1C, INPP5K, PITPNA-AS1, PITPNA, SLC43A2, SCARF1, RILP, PRPF8, TLCD2, MIR22HG, MIR22, WDR81, SERPINF2, SERPINF1, SMYD4, RPA1, RTN4RL1, DPH1, OVCA2, MIR132, MIR212, HIC1, SMG6, SRR, TSR1, SNORD91B, SNORD91A, SGSM2, MNT, LOC284009, METTL16, PAFAH1B1, …	ALOX12, MLLT6, HLF, CRLF3, TP53, KSR1, BRCA1, PYY, PPM1D, FAM57A, RABEP1, GSDMA, TAF15, AATF, NF1, BCAS3, SPECC1, PER1, SLC9A3R1, RPL26, USP6, SHBG, PRKAR1A, RNF213, TIMP2, XAF1, IGF2BP1, RAD51D, STARD3, GRB2, HIC1, ELAC2, RAC3, SUZ12P, ERBB2, WRAP53, CASC3, SLC4A1, CLTC, SEPT9, CLDN7, TRIM37, DDX5, AXIN2, SRSF2, ALOX15, MSI2, ASPSCR1, MIR21, GAS7, NCOR1, ETV4, IKZF3, CDC6, KDM6B, RARA, TRPV1, LA…	hsa-mir-3183, hsa-mir-22, hsa-mir-132, hsa-mir-212, HBII-296B, HBII-296A, hsa-mir-1253, hsa-mir-195, hsa-mir-497, hsa-mir-324, ACA48, mgU6-77, U67, ACA68, hsa-mir-4314, U8, hsa-mir-744, hsa-mir-548h-3, hsa-mir-1288, U49B, U49A, HBII-135, hsa-mir-33b, U3-2, U3-2B, U3-4, U3, U3-3, hsa-mir-1180, ACA59B, U42B, mgh18S-121, U42A, Z17B, hsa-mir-451, hsa-mir-144, hsa-mir-423, hsa-mir-3184, hsa-mir-193a, …	C-5VAZU	S-4LRWR	chr17:525-81041938
UPN19	Gain	2.89	18	q23	p11.32	342	77877.9	66936	arr[hg19] 18p11.32q23(136,226-78,014,123)x2-3	USP14, THOC1, COLEC12, CETN1, CLUL1, C18orf56, TYMS, ENOSF1, YES1, ADCYAP1, LINC00470, METTL4, NDC80, CBX3P2, SMCHD1, EMILIN2, LPIN2, LOC727896, MYOM1, MYL12A, MYL12B, TGIF1, DLGAP1, DLGAP1-AS1, DLGAP1-AS3, DLGAP1-AS4, DLGAP1-AS5, C18orf42, LINC00526, LINC00667, ZBTB14, EPB41L3, LOC645355, MIR3976, TMEM200C, L3MBTL4, MIR4317, LOC100130480, ARHGAP28, LINC00668, LAMA1, LRRC30, PTPRM, LOC100192426, …	SS18, MBD2, MALT1, DSG2, GATA6, PHLPP1, DCC, PTPN2, MAPK4, SMAD4, SLC39A6, BCL2, SETBP1, SMAD2, EPB41L3, RBBP8, SERPINB5, ZNF521	hsa-mir-4317, hsa-mir-3156-2, hsa-mir-320c-1, hsa-mir-133a-1, hsa-mir-1-2, hsa-mir-320c-2, hsa-mir-302f, hsa-mir-187, hsa-mir-4318, hsa-mir-924, hsa-mir-4319, hsa-mir-1539, U58C, U58A, U58B, mgU12-22/U4-8, U91, hsa-mir-4320, ACA37, hsa-mir-122	C-7KBTZ	C-6HGFA	chr18:136226-78014123
UPN19	Gain	4	21	q22.3	q11.2	293	33090.9	33620	arr[hg19] 21q11.2q22.3(15,006,457-48,097,372)x4	POTED, C21orf15, ANKRD20A11P, LIPI, RBM11, ABCC13, HSPA13, SAMSN1, SAMSN1-AS1, LOC388813, NRIP1, USP25, LINC00478, MIR99A, MIRLET7C, MIR125B2, C21orf37, CXADR, BTG3, C21orf91-OT1, C21orf91, CHODL-AS1, CHODL, TMPRSS15, LINC00320, NCAM2, RNU6-67P, LINC00317, LINC00308, D21S2088E, LOC339622, LINC00158, MIR155HG, MIR155, LINC00515, MRPL39, JAM2, ATP5J, GABPA, APP, CYYR1, ADAMTS1, ADAMTS5, MIR4759, MI…	U2AF1, PTTG1IP, TIAM1, MIR125B2, OLIG2, CSTB, ADAMTS1, NRIP1, TFF3, TFF2, TMPRSS3, ERG, ETS2, DYRK1A, TFF1, TMPRSS2, RUNX1, S100B	hsa-mir-3118-5, hsa-mir-99a, hsa-let-7c, hsa-mir-125b-2, hsa-mir-548x, hsa-mir-155, hsa-mir-4327, ACA67, hsa-mir-802, hsa-mir-3197	C-6OPRF	C-3ELOA	chr21:15006457-48097372
UPN19	Gain	3	X	q28	p22.33	1020	155065	189818	arr[hg19] Xp22.33q28(168,546-155,233,731)x3	PLCXD1, GTPBP6, LINC00685, PPP2R3B, SHOX, CRLF2, CSF2RA, MIR3690, IL3RA, SLC25A6, ASMTL-AS1, ASMTL, P2RY8, AKAP17A, ASMT, DHRSX, ZBED1, CD99P1, LINC00102, CD99, XG, XGPY2, GYG2, ARSD, ARSE, ARSH, ARSF, CXorf28, MXRA5, PRKX, LOC389906, NLGN4X, MIR4770, VCX3A, HDHD1, MIR4767, STS, VCX, PNPLA4, MIR651, VCX2, VCX3B, KAL1, FAM9A, FAM9B, TBL1X, GPR143, SHROOM2, LOC100288814, WWC3, CLCN4, MID1, HCCS, AR…	PHF6, RPL10, GATA1, GPC3, DKC1, DACH2, MIR221, L1CAM, STAG2, ARMCX1, IL3RA, CXCR3, MTCP1, SEPT6, FOXP3, FAM123B, NONO, RBBP7, RHOXF2, ZRSR2, ARMCX3, MSN, P2RY8, AIFM1, ARMCX2, KDM6A, ELF4, REPS2, Sep.06, SSX2, BRWD3, ZBTB33, TFE3, MIR222, AR, BTK, AMOT, BCOR, FOXO4, SPANXA1, CRLF2	hsa-mir-651, hsa-mir-1308, ACA12, hsa-mir-548f-5, hsa-mir-221, hsa-mir-222, SNORA11C, hsa-mir-532, hsa-mir-188, hsa-mir-500, hsa-mir-362, hsa-mir-501, hsa-mir-500b, hsa-mir-660, hsa-mir-502, SNORA11E, SNORA11D, hsa-mir-98, hsa-let-7f-2, U107, hsa-mir-1468, hsa-mir-223, hsa-mir-421, hsa-mir-374b, hsa-mir-545, hsa-mir-374a, hsa-mir-384, hsa-mir-325, hsa-mir-4328, hsa-mir-548i-4, hsa-mir-1321, hsa-m…	C-5QGHR	C-6KTXX	chrX:168546-155233731
UPN20	Loss	1	7	p12.2	p12.2	1	65.281	64	arr[hg19] 7p12.2(50,358,682-50,423,963)x1	IKZF1	IKZF1		C-4LMAJ	S-3DPSG	chr7:50358682-50423963
UPN20	Gain	2.85	4	q35.2	p16.3	891	190889	153163	arr[hg19] 4p16.3q35.2(68,345-190,957,473)x2-3	ZNF595, ZNF718, ZNF876P, ZNF732, ZNF141, ABCA11P, ZNF721, PIGG, PDE6B, ATP5I, MYL5, MFSD7, PCGF3, LOC100129917, CPLX1, GAK, TMEM175, DGKQ, SLC26A1, IDUA, FGFRL1, RNF212, TMED11P, SPON2, LOC100130872, CTBP1, CTBP1-AS2, MAEA, UVSSA, CRIPAK, FAM53A, SLBP, TMEM129, TACC3, FGFR3, LETM1, WHSC1, SCARNA22, NELFA, MIR943, C4orf48, NAT8L, POLN, HAUS3, MXD4, MIR4800, ZFYVE28, LOC402160, RNF4, FAM193A, TNIP2…	S100P, RCHY1, FGF2, FGFR3, FIP1L1, RASSF6, CHIC2, SYNPO2, FRYL, REST, TET2, MAD2L1, NR3C2, NUDT6, FAT1, KIT, WHSC1, AFF1, NFKB1, ING2, RAP1GDS1, EIF4E, AREG, LEF1, FBXW7, SORBS2, PDGFRA, TACC3, HNRNPD, NPY1R, RASL11B, RHOH, PTPN13, MAPK10, SPP1	hsa-mir-571, ACA11, hsa-mir-943, hsa-mir-4274, hsa-mir-95, hsa-mir-548i-2, hsa-mir-3138, hsa-mir-572, hsa-mir-218-1, hsa-mir-573, hsa-mir-4275, hsa-mir-1255b-1, hsa-mir-574, HBI-6, hsa-mir-1269, hsa-mir-575, hsa-mir-1255a, hsa-mir-576, hsa-mir-297, hsa-mir-367, hsa-mir-302d, hsa-mir-302a, hsa-mir-302c, hsa-mir-302b, hsa-mir-1243, hsa-mir-577, hsa-mir-1973, ACA24, hsa-mir-2054, hsa-mir-3139, hsa-m…		C-7HDOD	chr4:68345-190957473
UPN20	Gain	2.84	9	q34.3	p24.3	961	140817	100046	arr[hg19] 9p24.3q34.3(203,861-141,020,389)x2-3	C9orf66, DOCK8, KANK1, DMRT1, DMRT3, DMRT2, SMARCA2, FLJ35024, VLDLR, KCNV2, KIAA0020, RFX3, GLIS3, GLIS3-AS1, SLC1A1, SPATA6L, PPAPDC2, CDC37L1, AK3, RCL1, MIR101-2, JAK2, INSL6, INSL4, RLN2, RLN1, PLGRKT, CD274, PDCD1LG2, KIAA1432, ERMP1, MLANA, KIAA2026, MIR4665, RANBP6, IL33, TPD52L3, UHRF2, GLDC, KDM4C, C9orf123, PTPRD, TYRP1, LURAP1L, MPDZ, FLJ41200, LINC00583, NFIB, ZDHHC21, CER1, FREM1, L…	SH3GL2, HSPA5, CDK20, GNAQ, TXN, ANXA1, NUP214, RMRP, WNK2, PAX5, FANCC, CDKN2B, TEK, MIR7-1, NR4A3, ROR2, TNFSF15, DAB2IP, BAG1, FNBP1, PTPRD, RAPGEF1, NOTCH1, PAEP, SEMA4D, FOXE1, CKS2, CDKN2A, TAL2, RLN2, ABL1, PTCH1, SYK, IL11RA, PSIP1, MLLT3, KLF4, GFI1B, FAM22F, JAK2, MIR126, IFNA1, MLLT3 (AF9), TJP2, SIGMAR1, ALDOB, STOML2, DAPK1, CTSL1, PRRX2, TSC1, TNC, CCL27, FANCG, XPA, TOPORS, CNTRL, …	hsa-mir-101-2, hsa-mir-3152, U92, hsa-mir-491, hsa-mir-31, hsa-mir-876, hsa-mir-873, SNORD121B, SNORD121A, hsa-mir-1299, hsa-mir-204, hsa-mir-7-1, hsa-mir-4289, hsa-mir-3153, hsa-mir-4290, SNORA84, hsa-mir-4291, hsa-let-7a-1, hsa-let-7f-1, hsa-let-7d, hsa-mir-2278, hsa-mir-23b, hsa-mir-27b, hsa-mir-3074, hsa-mir-24-1, hsa-mir-1302-8, hsa-mir-32, hsa-mir-455, U70C, hsa-mir-147, HBII-295, hsa-mir-6…		C-5LURI	chr9:203861-141020389
UPN20	Gain	2.82	14	q32.33	q11.2	770	86773.8	85690	arr[hg19] 14q11.2q32.33(20,511,672-107,285,437)x2-3	OR4L1, OR4K17, OR4N5, OR11G2, OR11H6, OR11H4, TTC5, CCNB1IP1, SNORD126, RPPH1, PARP2, TEP1, KLHL33, OSGEP, APEX1, TMEM55B, PNP, RNASE10, RNASE9, RNASE11, RNASE12, OR6S1, ANG, RNASE4, EDDM3A, EDDM3B, RNASE6, RNASE1, RNASE3, ECRP, RNASE2, METTL17, SLC39A2, NDRG2, TPPP2, RNASE13, RNASE7, RNASE8, ARHGEF40, ZNF219, TMEM253, OR5AU1, LINC00641, HNRNPC, RPGRIP1, SUPT16H, CHD8, SNORD9, SNORD8, RAB2B, TOX4…	PAX9, STRN3, NIN, GPHN, PTPN21, MTA1, JAG2, SEL1L, TRA, EML1, NDRG2, SIX1, DPF3, NUMB, VRK1, MMP14, TRAF3, FOXA1, TCL6, PRKD1, NKX2-1, FUT8, IGH@, TRA@, TRD@, TSHR, ANG, XRCC3, ZFP36L1, TCL1B, AKT1, OTX2, TCL1A, DIO2, TRD, GPR68, MEG3, BCL11B, TRIP11, LGALS3, ESR2, SAV1, IGH	hsa-mir-1201, SNORD126, mgU6-53B, mgU6-53, hsa-mir-208a, hsa-mir-208b, hsa-mir-4307, hsa-mir-3171, hsa-mir-624, hsa-mir-3172, SNORD127, hsa-mir-4308, hsa-mir-548h-1, hsa-mir-625, hsa-mir-1260, ACA65, SNORA11B, hsa-mir-3173, U93, hsa-mir-342, hsa-mir-345, hsa-mir-770, hsa-mir-493, hsa-mir-337, hsa-mir-665, hsa-mir-431, hsa-mir-433, hsa-mir-127, hsa-mir-432, hsa-mir-136, 14q(0), hsa-mir-370, 14q(I-…		S-3HXYB	chr14:20511672-107285437
UPN20	Gain	4	21	q22.3	q11.2	293	33090.9	33620	arr[hg19] 21q11.2q22.3(15,006,457-48,097,372)x4	POTED, C21orf15, ANKRD20A11P, LIPI, RBM11, ABCC13, HSPA13, SAMSN1, SAMSN1-AS1, LOC388813, NRIP1, USP25, LINC00478, MIR99A, MIRLET7C, MIR125B2, C21orf37, CXADR, BTG3, C21orf91-OT1, C21orf91, CHODL-AS1, CHODL, TMPRSS15, LINC00320, NCAM2, RNU6-67P, LINC00317, LINC00308, D21S2088E, LOC339622, LINC00158, MIR155HG, MIR155, LINC00515, MRPL39, JAM2, ATP5J, GABPA, APP, CYYR1, ADAMTS1, ADAMTS5, MIR4759, MI…	U2AF1, PTTG1IP, TIAM1, MIR125B2, OLIG2, CSTB, ADAMTS1, NRIP1, TFF3, TFF2, TMPRSS3, ERG, ETS2, DYRK1A, TFF1, TMPRSS2, RUNX1, S100B	hsa-mir-3118-5, hsa-mir-99a, hsa-let-7c, hsa-mir-125b-2, hsa-mir-548x, hsa-mir-155, hsa-mir-4327, ACA67, hsa-mir-802, hsa-mir-3197		C-3ELOA	chr21:15006457-48097372
UPN20	Gain	3	X	p22.33	p22.33	22	2528.22	4102	arr[hg19] Xp22.33 or Yp11.32p11.31(168,546-2,696,762 or 118,546-2,646,762)x3	PLCXD1, GTPBP6, LINC00685, PPP2R3B, SHOX, CRLF2, CSF2RA, MIR3690, IL3RA, SLC25A6, ASMTL-AS1, ASMTL, P2RY8, AKAP17A, ASMT, DHRSX, ZBED1, CD99P1, LINC00102, CD99, XG, XGPY2	IL3RA, P2RY8, CRLF2		C-5QGHR	C-3KZKG	chrX:168546-2696762
UPN20	Gain	2	X	q28	p22.33	996	152209	185184	arr[hg19] Xp22.33q28(2,703,632-154,912,943)x2	XG, GYG2, ARSD, ARSE, ARSH, ARSF, CXorf28, MXRA5, PRKX, LOC389906, NLGN4X, MIR4770, VCX3A, HDHD1, MIR4767, STS, VCX, PNPLA4, MIR651, VCX2, VCX3B, KAL1, FAM9A, FAM9B, TBL1X, GPR143, SHROOM2, LOC100288814, WWC3, CLCN4, MID1, HCCS, ARHGAP6, AMELX, MSL3, FRMPD4, PRPS2, TLR7, TLR8-AS1, TLR8, TMSB4X, FAM9C, LOC100093698, ATXN3L, LOC100133123, EGFL6, TCEANC, RAB9A, TRAPPC2, OFD1, GPM6B, GEMIN8, GLRA2, F…	PHF6, RPL10, GATA1, GPC3, DKC1, DACH2, MIR221, L1CAM, STAG2, ARMCX1, CXCR3, MTCP1, SEPT6, FOXP3, FAM123B, NONO, RBBP7, RHOXF2, ZRSR2, ARMCX3, MSN, AIFM1, ARMCX2, KDM6A, ELF4, REPS2, Sep.06, SSX2, BRWD3, ZBTB33, TFE3, MIR222, AR, BTK, AMOT, BCOR, FOXO4, SPANXA1	hsa-mir-651, hsa-mir-1308, ACA12, hsa-mir-548f-5, hsa-mir-221, hsa-mir-222, SNORA11C, hsa-mir-532, hsa-mir-188, hsa-mir-500, hsa-mir-362, hsa-mir-501, hsa-mir-500b, hsa-mir-660, hsa-mir-502, SNORA11E, SNORA11D, hsa-mir-98, hsa-let-7f-2, U107, hsa-mir-1468, hsa-mir-223, hsa-mir-421, hsa-mir-374b, hsa-mir-545, hsa-mir-374a, hsa-mir-384, hsa-mir-325, hsa-mir-4328, hsa-mir-548i-4, hsa-mir-1321, hsa-m…		C-4KFAC	chrX:2703632-154912943
UPN20	Gain	3	X	q28	q28	3	314.96	532	arr[hg19] Xq28(154,918,771-155,233,731)x3	SPRY3, VAMP7, IL9R			C-4XSGY	C-6KTXX	chrX:154918771-155233731
UPN21	LossMosaic	1.73	16	q24.2	q12.2	317	32467.5	30179	arr[hg19] 16q12.2q24.2(54,718,867-87,186,353)x1-2	CRNDE, IRX5, IRX6, MMP2, LPCAT2, CAPNS2, SLC6A2, CES1P2, CES1P1, CES1, CES5A, LOC283856, GNAO1, DKFZP434H168, MIR3935, AMFR, NUDT21, OGFOD1, BBS2, MT4, MT3, MT2A, MT1L, MT1E, MT1M, MT1JP, MT1A, MT1DP, MT1B, MT1F, MT1G, MT1H, MT1IP, MT1X, NUP93, MIR138-2, SLC12A3, HERPUD1, CETP, NLRC5, CPNE2, FAM192A, RSPRY1, ARL2BP, PLLP, CCL22, CX3CL1, CCL17, CIAPIN1, COQ9, POLR2C, DOK4, CCDC102A, GPR114, GPR56,…	CENPT, RANBP10, NQO1, ACD, ZFHX3, CTCF, WFDC1, PHLPP2, NOL3, CBFB, RLTPR, MAF, AMFR, GFOD2, CDH1, TSNAXIP1, MMP2, FAM65A, WWOX, CDH13, TERF2	hsa-mir-138-2, ACA46, ACA50, hsa-mir-328, hsa-mir-1538, hsa-mir-140, hsa-mir-1972-2, HBII-82B, HBII-82, U70D, HBII-239, hsa-mir-3182, hsa-mir-1910	S-3YMRT	S-3HJZQ	chr16:54718867-87186353
UPN21	Gain	3	1	q43	q21.1	1006	92559.1	91888	arr[hg19] 1q21.1q43(146,635,793-239,194,869)x3	PRKAB2, PDIA3P, FMO5, CHD1L, LINC00624, BCL9, ACP6, GJA5, GJA8, GPR89B, GPR89C, PDZK1P1, NBPF24, NBPF11, NBPF8, MIR5087, FLJ39739, PPIAL4B, PPIAL4A, PPIAL4D, PPIAL4F, NBPF14, NBPF9, NBPF15, NBPF16, PPIAL4E, LOC645166, LOC388692, FCGR1C, PPIAL4C, LINC00869, LINC00623, HIST2H2BF, FCGR1A, HIST2H3D, HIST2H4A, HIST2H4B, HIST2H3C, HIST2H3A, HIST2H2AA4, HIST2H2AA3, HIST2H2BC, HIST2H2BE, HIST2H2AC, HIST2…	CREG1, FCGR2B, EGLN1, MAPKAPK2, RCSD1, ADIPOR1, PTPRC, CRTC2, SHC1, PRCC, CKS1B, ATF3, S100A10, BCL9, KCNH1, CENPF, GAS5, ABL2, IGSF8, MEF2D, SMYD2, PLA2G4A, S100A1, RPS27, PBX1, TNFSF18, PVRL4, PRRX1, TP53BP2, CDC73, DUSP10, RGS2, PTPN7, S100A4, ASPM, S100A13, DHX9, TPM3, ARHGEF2, S100A9, MIXL1, TPR, ENAH, PTGS2, USF1, MLLT11, GLRX2, ESRRG, SDHC, PSEN2, ARNT, S100A8, ECM1, TNN, B3GALT2, S100A7, …	hsa-mir-4257, hsa-mir-554, hsa-mir-190b, hsa-mir-4258, hsa-mir-92b, hsa-mir-555, ACA42, ACA26, hsa-mir-9-1, hsa-mir-765, hsa-mir-4259, hsa-mir-556, hsa-mir-921, hsa-mir-1255b-2, hsa-mir-557, hsa-mir-3119-1, hsa-mir-3119-2, hsa-mir-1295, hsa-mir-214, hsa-mir-3120, hsa-mir-199a-2, U81, U47, U80, U79, U78, U44, U77, U76, U75, U74, HBI-100, hsa-mir-488, hsa-mir-3121, hsa-mir-1278, hsa-mir-181b-1, hsa…		C-3TUKL	chr1:146635793-239194869
UPN21	Gain	3	4	q35.2	p16.3	883	190442	152580	arr[hg19] 4p16.3q35.2(373,976-190,816,266)x3	ABCA11P, ZNF721, PIGG, PDE6B, ATP5I, MYL5, MFSD7, PCGF3, LOC100129917, CPLX1, GAK, TMEM175, DGKQ, SLC26A1, IDUA, FGFRL1, RNF212, TMED11P, SPON2, LOC100130872, CTBP1, CTBP1-AS2, MAEA, UVSSA, CRIPAK, FAM53A, SLBP, TMEM129, TACC3, FGFR3, LETM1, WHSC1, SCARNA22, NELFA, MIR943, C4orf48, NAT8L, POLN, HAUS3, MXD4, MIR4800, ZFYVE28, LOC402160, RNF4, FAM193A, TNIP2, SH3BP2, ADD1, MFSD10, NOP14-AS1, NOP14,…	S100P, RCHY1, FGF2, FGFR3, FIP1L1, RASSF6, CHIC2, SYNPO2, FRYL, REST, TET2, MAD2L1, NR3C2, NUDT6, FAT1, KIT, WHSC1, AFF1, NFKB1, ING2, RAP1GDS1, EIF4E, AREG, LEF1, FBXW7, SORBS2, PDGFRA, TACC3, HNRNPD, NPY1R, RASL11B, RHOH, PTPN13, MAPK10, SPP1	ACA11, hsa-mir-943, hsa-mir-4274, hsa-mir-95, hsa-mir-548i-2, hsa-mir-3138, hsa-mir-572, hsa-mir-218-1, hsa-mir-573, hsa-mir-4275, hsa-mir-1255b-1, hsa-mir-574, HBI-6, hsa-mir-1269, hsa-mir-575, hsa-mir-1255a, hsa-mir-576, hsa-mir-297, hsa-mir-367, hsa-mir-302d, hsa-mir-302a, hsa-mir-302c, hsa-mir-302b, hsa-mir-1243, hsa-mir-577, hsa-mir-1973, ACA24, hsa-mir-2054, hsa-mir-3139, hsa-mir-548g, U73b…		C-6JVJH	chr4:373976-190816266
UPN21	Gain	3	6	q27	p25.3	1220	170763	155053	arr[hg19] 6p25.3q27(156,974-170,919,482)x3	DUSP22, IRF4, EXOC2, HUS1B, LOC285768, FOXQ1, FOXF2, FOXC1, GMDS, LOC100508120, C6orf195, MYLK4, WRNIP1, SERPINB1, MIR4645, MGC39372, SERPINB9, SERPINB6, DKFZP686I15217, NQO2, HTATSF1P2, RIPK1, BPHL, TUBB2A, LOC100507194, TUBB2B, PSMG4, SLC22A23, PXDC1, FAM50B, PRPF4B, FAM217A, C6orf201, ECI2, CDYL, RPP40, PPP1R3G, LYRM4, MIR3691, FARS2, NRN1, F13A1, LY86-AS1, LY86, RREB1, SSR1, CAGE1, RIOK1, DSP…	CD109, CEP85L, PPARD, CTGF, MLLT4, IGF2R, DAXX, CCND3, AHI1, BCLAF1, FOXO3, SOX4, ID4, LIN28B, CCNC, PLAGL1, FGFR1OP, SESN1, IRF4, TFAP2A, TNFAIP3, IER3, DEK, DDR1, CDKN1A, FANCE, LATS1, PRDM1, THBS2, DDX43, CITED2, BAK1, MYB, JARID2, CASP8AP2 , POLH, HIST1H2BH, WISP3, IL17A, HIST1H3F, HMGA1, EEF1A1, HFE, RUNX2, MAPK13, TFEB, ZFAND3, EPHA7, CAGE1, RNF217-AS1, hsa-mir-548a-2, AKAP12, AGER, MAP3K7,…	hsa-mir-548a-1, hsa-mir-3143, U32B, hsa-mir-877, U83, U84, ACA38, U48, U52, hsa-mir-1236, hsa-mir-219-1, hsa-mir-1275, hsa-mir-586, hsa-mir-206, hsa-mir-133b, hsa-mir-548u, hsa-mir-30c-2, hsa-mir-30a, hsa-mir-4282, U50, U50B, hsa-mir-2113, hsa-mir-587, hsa-mir-548b, hsa-mir-3144, hsa-mir-588, U101, HBII-429, ACA33, hsa-mir-548a-2, hsa-mir-3145, hsa-mir-1273c, hsa-mir-1202, ACA20, ACA29, hsa-mir-1…		C-5ELRJ	chr6:156974-170919482
UPN21	Gain	3	10	q26.3	p15.3	921	135254	133153	arr[hg19] 10p15.3q26.3(173,330-135,427,143)x3	ZMYND11, DIP2C, MIR5699, PRR26, LARP4B, GTPBP4, IDI2, IDI2-AS1, IDI1, WDR37, LINC00200, ADARB2, ADARB2-AS1, LINC00700, LINC00701, PFKP, PITRM1, PITRM1-AS1, KLF6, LINC00704, LINC00705, AKR1E2, AKR1C6P, AKR1C1, AKR1C2, AKR1C3, AKR1CL1, AKR1C4, UCN3, TUBAL3, NET1, CALML5, CALML3, ASB13, FAM208B, GDI2, ANKRD16, FBXO18, IL15RA, IL2RA, RBM17, PFKFB3, MIR3155A, MIR3155B, LOC399715, PRKCQ, PRKCQ-AS1, LIN…	GATA3, SIRT1, MLLT10, FGFR2, DMBT1, KLF6, BNIP3, NT5C2, LGI1, ZMIZ1, HTRA1, TLX1, ADAM12, AKR1C3, KAT6B, ERCC6, NCOA4, AIFM2, ALOX5, PDCD4, DKK1, FGF8, LDB1, BMI1, PTEN, ARID5B, NET1, BLNK, BTRC, ADD3, LOXL4, SNCG, NFKB2, TET1, EIF3A, BAG3, PSAP, MXI1, PAX2, MRC1, RHOBTB1, MAPK8, CCDC6, ABI1, RET	hsa-mir-3155, hsa-mir-548q, hsa-mir-4293, hsa-mir-1265, hsa-mir-511-1, hsa-mir-511-2, hsa-mir-1915, hsa-mir-603, hsa-mir-604, hsa-mir-938, hsa-mir-3156-1, hsa-mir-4294, hsa-mir-605, hsa-mir-548f-1, hsa-mir-1296, HBII-419, hsa-mir-1254, hsa-mir-606, hsa-mir-346, hsa-mir-107, hsa-mir-3157, hsa-mir-607, hsa-mir-1287, U108, hsa-mir-608, hsa-mir-3158-2, hsa-mir-3158-1, hsa-mir-146b, hsa-mir-1307, hsa-…		C-5DPFD	chr10:173330-135427143
UPN21	Gain	3	14	q32.33	q11.2	761	86483.1	85178	arr[hg19] 14q11.2q32.33(20,802,288-107,285,437)x3	RPPH1, PARP2, TEP1, KLHL33, OSGEP, APEX1, TMEM55B, PNP, RNASE10, RNASE9, RNASE11, RNASE12, OR6S1, ANG, RNASE4, EDDM3A, EDDM3B, RNASE6, RNASE1, RNASE3, ECRP, RNASE2, METTL17, SLC39A2, NDRG2, TPPP2, RNASE13, RNASE7, RNASE8, ARHGEF40, ZNF219, TMEM253, OR5AU1, LINC00641, HNRNPC, RPGRIP1, SUPT16H, CHD8, SNORD9, SNORD8, RAB2B, TOX4, METTL3, SALL2, OR10G3, OR10G2, OR4E2, DAD1, ABHD4, OXA1L, SLC7A7, MRPL…	PAX9, STRN3, NIN, GPHN, PTPN21, MTA1, JAG2, SEL1L, TRA, EML1, NDRG2, SIX1, DPF3, NUMB, VRK1, MMP14, TRAF3, FOXA1, TCL6, PRKD1, NKX2-1, FUT8, IGH@, TRA@, TRD@, TSHR, ANG, XRCC3, ZFP36L1, TCL1B, AKT1, OTX2, TCL1A, DIO2, TRD, GPR68, MEG3, BCL11B, TRIP11, LGALS3, ESR2, SAV1, IGH	mgU6-53B, mgU6-53, hsa-mir-208a, hsa-mir-208b, hsa-mir-4307, hsa-mir-3171, hsa-mir-624, hsa-mir-3172, SNORD127, hsa-mir-4308, hsa-mir-548h-1, hsa-mir-625, hsa-mir-1260, ACA65, SNORA11B, hsa-mir-3173, U93, hsa-mir-342, hsa-mir-345, hsa-mir-770, hsa-mir-493, hsa-mir-337, hsa-mir-665, hsa-mir-431, hsa-mir-433, hsa-mir-127, hsa-mir-432, hsa-mir-136, 14q(0), hsa-mir-370, 14q(I-1), 14q(I-2), 14q(I-3), …		S-3HXYB	chr14:20802288-107285437
UPN21	Gain	3	17	q25.3	p13.3	1372	80902.9	73156	arr[hg19] 17p13.3q25.3(525-80,903,396)x3	DOC2B, RPH3AL, LOC100506388, C17orf97, FAM101B, VPS53, FAM57A, GEMIN4, DBIL5P, GLOD4, RNMTL1, NXN, TIMM22, ABR, MIR3183, BHLHA9, TUSC5, YWHAE, CRK, MYO1C, INPP5K, PITPNA-AS1, PITPNA, SLC43A2, SCARF1, RILP, PRPF8, TLCD2, MIR22HG, MIR22, WDR81, SERPINF2, SERPINF1, SMYD4, RPA1, RTN4RL1, DPH1, OVCA2, MIR132, MIR212, HIC1, SMG6, SRR, TSR1, SNORD91B, SNORD91A, SGSM2, MNT, LOC284009, METTL16, PAFAH1B1, …	ALOX12, MLLT6, HLF, CRLF3, TP53, KSR1, BRCA1, PYY, PPM1D, FAM57A, RABEP1, GSDMA, TAF15, AATF, NF1, BCAS3, SPECC1, PER1, SLC9A3R1, RPL26, USP6, SHBG, PRKAR1A, RNF213, TIMP2, XAF1, IGF2BP1, RAD51D, STARD3, GRB2, HIC1, ELAC2, RAC3, SUZ12P, ERBB2, WRAP53, CASC3, SLC4A1, CLTC, SEPT9, CLDN7, TRIM37, DDX5, AXIN2, SRSF2, ALOX15, MSI2, ASPSCR1, MIR21, GAS7, NCOR1, ETV4, IKZF3, CDC6, KDM6B, RARA, TRPV1, LA…	hsa-mir-3183, hsa-mir-22, hsa-mir-132, hsa-mir-212, HBII-296B, HBII-296A, hsa-mir-1253, hsa-mir-195, hsa-mir-497, hsa-mir-324, ACA48, mgU6-77, U67, ACA68, hsa-mir-4314, U8, hsa-mir-744, hsa-mir-548h-3, hsa-mir-1288, U49B, U49A, HBII-135, hsa-mir-33b, U3-2, U3-2B, U3-4, U3, U3-3, hsa-mir-1180, ACA59B, U42B, mgh18S-121, U42A, Z17B, hsa-mir-451, hsa-mir-144, hsa-mir-423, hsa-mir-3184, hsa-mir-193a, …		S-3KTEA	chr17:525-80903396
UPN21	Gain	3	18	q23	p11.32	342	77877.9	66936	arr[hg19] 18p11.32q23(136,226-78,014,123)x3	USP14, THOC1, COLEC12, CETN1, CLUL1, C18orf56, TYMS, ENOSF1, YES1, ADCYAP1, LINC00470, METTL4, NDC80, CBX3P2, SMCHD1, EMILIN2, LPIN2, LOC727896, MYOM1, MYL12A, MYL12B, TGIF1, DLGAP1, DLGAP1-AS1, DLGAP1-AS3, DLGAP1-AS4, DLGAP1-AS5, C18orf42, LINC00526, LINC00667, ZBTB14, EPB41L3, LOC645355, MIR3976, TMEM200C, L3MBTL4, MIR4317, LOC100130480, ARHGAP28, LINC00668, LAMA1, LRRC30, PTPRM, LOC100192426, …	SS18, MBD2, MALT1, DSG2, GATA6, PHLPP1, DCC, PTPN2, MAPK4, SMAD4, SLC39A6, BCL2, SETBP1, SMAD2, EPB41L3, RBBP8, SERPINB5, ZNF521	hsa-mir-4317, hsa-mir-3156-2, hsa-mir-320c-1, hsa-mir-133a-1, hsa-mir-1-2, hsa-mir-320c-2, hsa-mir-302f, hsa-mir-187, hsa-mir-4318, hsa-mir-924, hsa-mir-4319, hsa-mir-1539, U58C, U58A, U58B, mgU12-22/U4-8, U91, hsa-mir-4320, ACA37, hsa-mir-122		C-6HGFA	chr18:136226-78014123
UPN21	Gain	4	21	q22.3	q11.2	293	33090.9	33620	arr[hg19] 21q11.2q22.3(15,006,457-48,097,372)x4	POTED, C21orf15, ANKRD20A11P, LIPI, RBM11, ABCC13, HSPA13, SAMSN1, SAMSN1-AS1, LOC388813, NRIP1, USP25, LINC00478, MIR99A, MIRLET7C, MIR125B2, C21orf37, CXADR, BTG3, C21orf91-OT1, C21orf91, CHODL-AS1, CHODL, TMPRSS15, LINC00320, NCAM2, RNU6-67P, LINC00317, LINC00308, D21S2088E, LOC339622, LINC00158, MIR155HG, MIR155, LINC00515, MRPL39, JAM2, ATP5J, GABPA, APP, CYYR1, ADAMTS1, ADAMTS5, MIR4759, MI…	U2AF1, PTTG1IP, TIAM1, MIR125B2, OLIG2, CSTB, ADAMTS1, NRIP1, TFF3, TFF2, TMPRSS3, ERG, ETS2, DYRK1A, TFF1, TMPRSS2, RUNX1, S100B	hsa-mir-3118-5, hsa-mir-99a, hsa-let-7c, hsa-mir-125b-2, hsa-mir-548x, hsa-mir-155, hsa-mir-4327, ACA67, hsa-mir-802, hsa-mir-3197	C-6OPRF	C-3ELOA	chr21:15006457-48097372
UPN21	Gain	2	X	q28	p22.33	1017	154665	189244	arr[hg19] Xp22.33q28(168,546-154,833,987)x2	PLCXD1, GTPBP6, LINC00685, PPP2R3B, SHOX, CRLF2, CSF2RA, MIR3690, IL3RA, SLC25A6, ASMTL-AS1, ASMTL, P2RY8, AKAP17A, ASMT, DHRSX, ZBED1, CD99P1, LINC00102, CD99, XG, XGPY2, GYG2, ARSD, ARSE, ARSH, ARSF, CXorf28, MXRA5, PRKX, LOC389906, NLGN4X, MIR4770, VCX3A, HDHD1, MIR4767, STS, VCX, PNPLA4, MIR651, VCX2, VCX3B, KAL1, FAM9A, FAM9B, TBL1X, GPR143, SHROOM2, LOC100288814, WWC3, CLCN4, MID1, HCCS, AR…	PHF6, RPL10, GATA1, GPC3, DKC1, DACH2, MIR221, L1CAM, STAG2, ARMCX1, IL3RA, CXCR3, MTCP1, SEPT6, FOXP3, FAM123B, NONO, RBBP7, RHOXF2, ZRSR2, ARMCX3, MSN, P2RY8, AIFM1, ARMCX2, KDM6A, ELF4, REPS2, Sep.06, SSX2, BRWD3, ZBTB33, TFE3, MIR222, AR, BTK, AMOT, BCOR, FOXO4, SPANXA1, CRLF2	hsa-mir-651, hsa-mir-1308, ACA12, hsa-mir-548f-5, hsa-mir-221, hsa-mir-222, SNORA11C, hsa-mir-532, hsa-mir-188, hsa-mir-500, hsa-mir-362, hsa-mir-501, hsa-mir-500b, hsa-mir-660, hsa-mir-502, SNORA11E, SNORA11D, hsa-mir-98, hsa-let-7f-2, U107, hsa-mir-1468, hsa-mir-223, hsa-mir-421, hsa-mir-374b, hsa-mir-545, hsa-mir-374a, hsa-mir-384, hsa-mir-325, hsa-mir-4328, hsa-mir-548i-4, hsa-mir-1321, hsa-m…	C-5QGHR	C-4NKOW	chrX:168546-154833987
UPN22	LOH		15	q26.3	q11.2	806	79523.5	26330	arr[hg19] 15q11.2q26.3(22,905,569-102,429,049) hmz	CYFIP1, NIPA2, NIPA1, LOC283683, WHAMMP3, GOLGA8I, HERC2P2, HERC2P7, GOLGA8EP, LOC440243, GOLGA8S, MIR4508, MKRN3, MAGEL2, NDN, PWRN2, PWRN1, NPAP1, SNRPN, SNURF, SNORD107, PWARSN, PWAR5, SNORD64, SNORD108, SNORD109A, SNORD109B, SNORD116-1, SNORD116-2, SNORD116-3, SNORD116-9, SNORD116-4, SNORD116-5, SNORD116-7, SNORD116-6, SNORD116-8, SNORD116-10, SNORD116-11, SNORD116-12, SNORD116-13, SNORD116-1…	MAPK6, KIAA0101, TCF12, ITGA11, IDH2, ADAM10, ITPKA, SHC4, BLM, LTK, UBE3A, PML, CTSH, BUB1B, CASC5, IGF1R, SPINT1, NEIL1, THBS1, GOLGA6A, RASGRF1, TYRO3, GCNT3, COPS2, SPRED1, PLCB2, BMF, hsa-mir-626, ATP10A, TRPM1, PKM2, NTRK3, C15orf55	HBII-436, HBII-13, HBII-437, HBII-438A, HBII-85-1, HBII-85-2, HBII-85-3, HBII-85-4, HBII-85-5, HBII-85-6, HBII-85-7, HBII-85-8, HBII-85-9, HBII-85-10, HBII-85-11, HBII-85-12, HBII-85-13, HBII-85-14, HBII-85-15, HBII-85-16, HBII-85-17, HBII-85-18, HBII-85-19, HBII-85-20, HBII-85-21, HBII-85-22, HBII-85-23, HBII-85-24, HBII-85-25, HBII-85-26, HBII-85-27, HBII-85-28, HBII-85-29, HBII-52-1, HBII-52-2…		S-3ERSU	chr15:22905569-102429049
UPN22	GainMosaic	3	1	q32.2	q21.1	830	66314.3	64519	arr[hg19] 1q21.1q32.2(145,103,489-211,417,790)x3-4	LOC100288142, NBPF9, SEC22B, NOTCH2NL, NBPF10, HFE2, TXNIP, POLR3GL, ANKRD34A, LIX1L, RBM8A, GNRHR2, PEX11B, ITGA10, ANKRD35, PIAS3, NUDT17, POLR3C, RNF115, CD160, PDZK1, GPR89A, GPR89C, PDZK1P1, NBPF24, NBPF11, HYDIN2, NBPF12, LOC728989, NBPF13P, PRKAB2, PDIA3P, FMO5, CHD1L, LINC00624, BCL9, ACP6, GJA5, GJA8, GPR89B, NBPF8, MIR5087, FLJ39739, PPIAL4B, PPIAL4A, PPIAL4D, PPIAL4F, NBPF14, NBPF15, N…	CREG1, FCGR2B, MAPKAPK2, RCSD1, ADIPOR1, PTPRC, CRTC2, SHC1, PRCC, CKS1B, S100A10, BCL9, PIAS3, KCNH1, GAS5, ABL2, IGSF8, MEF2D, PLA2G4A, S100A1, RPS27, PBX1, TNFSF18, PVRL4, PRRX1, CDC73, RGS2, PTPN7, S100A4, ASPM, S100A13, DHX9, TPM3, ARHGEF2, S100A9, TPR, PTGS2, USF1, MLLT11, GLRX2, SDHC, ARNT, S100A8, ECM1, TNN, B3GALT2, S100A7, TROVE2, SELE, KIF14, GPA33	hsa-mir-4257, hsa-mir-554, hsa-mir-190b, hsa-mir-4258, hsa-mir-92b, hsa-mir-555, ACA42, ACA26, hsa-mir-9-1, hsa-mir-765, hsa-mir-4259, hsa-mir-556, hsa-mir-921, hsa-mir-1255b-2, hsa-mir-557, hsa-mir-3119-1, hsa-mir-3119-2, hsa-mir-1295, hsa-mir-214, hsa-mir-3120, hsa-mir-199a-2, U81, U47, U80, U79, U78, U44, U77, U76, U75, U74, HBI-100, hsa-mir-488, hsa-mir-3121, hsa-mir-1278, hsa-mir-181b-1, hsa…		C-3DVVC	chr1:145103489-211417790
UPN22	Loss	1	9	p21.3	p21.3	1	44.546	71	arr[hg19] 9p21.3(21,790,066-21,834,612)x1	MTAP	MTAP		S-3BORB	C-3PLGG	chr9:21790066-21834612
UPN22	Loss	0	9	p21.3	p21.3	5	260.798	324	arr[hg19] 9p21.3(21,838,491-22,099,289)x0	MTAP, C9orf53, CDKN2A, CDKN2B-AS1, CDKN2B	CDKN2B, CDKN2A, MTAP		C-6GZED	C-5AXUI	chr9:21838491-22099289
UPN22	Loss	1	9	p21.3	p21.3	1	183.546	121	arr[hg19] 9p21.3(22,099,607-22,283,153)x1	CDKN2B-AS1			C-4YGCZ	S-4OZGT	chr9:22099607-22283153
UPN22	Loss	1	X	q21.31	p22.33	516	88636.2	88214	arr[hg19] Xp22.33q21.31(2,645,365-91,281,525)x1	CD99, XG, XGPY2, GYG2, ARSD, ARSE, ARSH, ARSF, CXorf28, MXRA5, PRKX, LOC389906, NLGN4X, MIR4770, VCX3A, HDHD1, MIR4767, STS, VCX, PNPLA4, MIR651, VCX2, VCX3B, KAL1, FAM9A, FAM9B, TBL1X, GPR143, SHROOM2, LOC100288814, WWC3, CLCN4, MID1, HCCS, ARHGAP6, AMELX, MSL3, FRMPD4, PRPS2, TLR7, TLR8-AS1, TLR8, TMSB4X, FAM9C, LOC100093698, ATXN3L, LOC100133123, EGFL6, TCEANC, RAB9A, TRAPPC2, OFD1, GPM6B, GEM…	GATA1, DACH2, MIR221, CXCR3, FOXP3, FAM123B, NONO, RBBP7, ZRSR2, MSN, KDM6A, REPS2, SSX2, BRWD3, TFE3, MIR222, AR, BCOR, FOXO4	hsa-mir-651, hsa-mir-1308, ACA12, hsa-mir-548f-5, hsa-mir-221, hsa-mir-222, SNORA11C, hsa-mir-532, hsa-mir-188, hsa-mir-500, hsa-mir-362, hsa-mir-501, hsa-mir-500b, hsa-mir-660, hsa-mir-502, SNORA11E, SNORA11D, hsa-mir-98, hsa-let-7f-2, U107, hsa-mir-1468, hsa-mir-223, hsa-mir-421, hsa-mir-374b, hsa-mir-545, hsa-mir-374a, hsa-mir-384, hsa-mir-325, hsa-mir-4328, hsa-mir-548i-4, hsa-mir-1321, hsa-m…		C-7CRHP	chrX:2645365-91281525
UPN22	Gain	2.6	1	q32.2	q21.1	828	65653.2	63960	arr[hg19] 1q21.1q32.2(145,398,236-211,051,422)x2-3	LOC100288142, NBPF10, HFE2, TXNIP, POLR3GL, ANKRD34A, LIX1L, RBM8A, GNRHR2, PEX11B, ITGA10, ANKRD35, PIAS3, NUDT17, POLR3C, RNF115, CD160, PDZK1, GPR89A, GPR89C, PDZK1P1, NBPF24, NBPF11, HYDIN2, NBPF12, LOC728989, NBPF13P, PRKAB2, PDIA3P, FMO5, CHD1L, LINC00624, BCL9, ACP6, GJA5, GJA8, GPR89B, NBPF8, MIR5087, FLJ39739, PPIAL4B, PPIAL4A, PPIAL4D, PPIAL4F, NBPF14, NBPF9, NBPF15, NBPF16, PPIAL4E, LO…	CREG1, FCGR2B, MAPKAPK2, RCSD1, ADIPOR1, PTPRC, CRTC2, SHC1, PRCC, CKS1B, S100A10, BCL9, PIAS3, GAS5, ABL2, IGSF8, MEF2D, PLA2G4A, S100A1, RPS27, PBX1, TNFSF18, PVRL4, PRRX1, CDC73, RGS2, PTPN7, S100A4, ASPM, S100A13, DHX9, TPM3, ARHGEF2, S100A9, TPR, PTGS2, USF1, MLLT11, GLRX2, SDHC, ARNT, S100A8, ECM1, TNN, B3GALT2, S100A7, TROVE2, SELE, KIF14, GPA33, KCNH1	hsa-mir-4257, hsa-mir-554, hsa-mir-190b, hsa-mir-4258, hsa-mir-92b, hsa-mir-555, ACA42, ACA26, hsa-mir-9-1, hsa-mir-765, hsa-mir-4259, hsa-mir-556, hsa-mir-921, hsa-mir-1255b-2, hsa-mir-557, hsa-mir-3119-1, hsa-mir-3119-2, hsa-mir-1295, hsa-mir-214, hsa-mir-3120, hsa-mir-199a-2, U81, U47, U80, U79, U78, U44, U77, U76, U75, U74, HBI-100, hsa-mir-488, hsa-mir-3121, hsa-mir-1278, hsa-mir-181b-1, hsa…		C-3ORXK	chr1:145398236-211051422
UPN22	Gain	3	2	q22.1	p25.3	862	138963	114336	arr[hg19] 2p25.3q22.1(12,770-138,975,964)x3	FAM110C, SH3YL1, ACP1, FAM150B, TMEM18, LOC339822, SNTG2, TPO, PXDN, MYT1L, LOC730811, TSSC1, TRAPPC12, ADI1, RNASEH1, LOC100506054, RPS7, COLEC11, ALLC, LOC100505964, LOC727982, SOX11, LOC150622, LOC400940, LINC00487, CMPK2, RSAD2, RNF144A-AS1, RNF144A, LOC100506274, LOC339788, LINC00299, ID2, KIDINS220, MBOAT2, ASAP2, ITGB1BP1, CPSF3, IAH1, ADAM17, YWHAQ, TAF1B, GRHL1, KLF11, CYS1, RRM2, C2orf4…	ERCC3, CAPG, ALK, RTN4, SDC1, MSH6, BIRC6, THADA, FHL2, BRE, BUB1, LOXL3, PAX8, EML4, BCL11A, FBXO11, KCMF1, EPCAM, MTA3, XPO1, RANBP2, NLRC4, MYCN, MAL, TGFBRAP1, STRN, LHCGR, IL1B, TTL, ADAM17, IGK, TMSB10, DDX1, SOX11, REL, DNMT3A, BCL2L11, E2F6, BIN1, MSH2, MERTK, AFF3, RHOB	hsa-mir-4261, ACA67B, hsa-mir-548s, hsa-mir-4262, hsa-mir-3125, hsa-mir-1301, hsa-mir-4263, HBII-316, U53, hsa-mir-558, hsa-mir-559, hsa-mir-217, hsa-mir-216a, hsa-mir-216b, U70B, hsa-mir-3126, SNORA36C, hsa-mir-1285-2, hsa-mir-4264, U94, hsa-mir-3127, HBII-289, hsa-mir-4265, hsa-mir-4266, hsa-mir-4267, hsa-mir-1302-3, hsa-mir-663b, hsa-mir-128-1		C-5RYMP	chr2:12770-138975964
UPN22	Gain	3	4	q35.2	p16.3	890	190843	153047	arr[hg19] 4p16.3q35.2(114,784-190,957,473)x3	ZNF718, ZNF876P, ZNF732, ZNF141, ABCA11P, ZNF721, PIGG, PDE6B, ATP5I, MYL5, MFSD7, PCGF3, LOC100129917, CPLX1, GAK, TMEM175, DGKQ, SLC26A1, IDUA, FGFRL1, RNF212, TMED11P, SPON2, LOC100130872, CTBP1, CTBP1-AS2, MAEA, UVSSA, CRIPAK, FAM53A, SLBP, TMEM129, TACC3, FGFR3, LETM1, WHSC1, SCARNA22, NELFA, MIR943, C4orf48, NAT8L, POLN, HAUS3, MXD4, MIR4800, ZFYVE28, LOC402160, RNF4, FAM193A, TNIP2, SH3BP2…	S100P, RCHY1, FGF2, FGFR3, FIP1L1, RASSF6, CHIC2, SYNPO2, FRYL, REST, TET2, MAD2L1, NR3C2, NUDT6, FAT1, KIT, WHSC1, AFF1, NFKB1, ING2, RAP1GDS1, EIF4E, AREG, LEF1, FBXW7, SORBS2, PDGFRA, TACC3, HNRNPD, NPY1R, RASL11B, RHOH, PTPN13, MAPK10, SPP1	hsa-mir-571, ACA11, hsa-mir-943, hsa-mir-4274, hsa-mir-95, hsa-mir-548i-2, hsa-mir-3138, hsa-mir-572, hsa-mir-218-1, hsa-mir-573, hsa-mir-4275, hsa-mir-1255b-1, hsa-mir-574, HBI-6, hsa-mir-1269, hsa-mir-575, hsa-mir-1255a, hsa-mir-576, hsa-mir-297, hsa-mir-367, hsa-mir-302d, hsa-mir-302a, hsa-mir-302c, hsa-mir-302b, hsa-mir-1243, hsa-mir-577, hsa-mir-1973, ACA24, hsa-mir-2054, hsa-mir-3139, hsa-m…		C-7HDOD	chr4:114784-190957473
UPN22	Gain	3	5	q35.3	p15.33	1033	180565	153728	arr[hg19] 5p15.33q35.3(113,576-180,678,091)x3	PLEKHG4B, LRRC14B, CCDC127, SDHA, PDCD6, AHRR, C5orf55, EXOC3, PP7080, SLC9A3, MIR4456, LOC100996325, CEP72, TPPP, ZDHHC11, BRD9, TRIP13, LOC100506688, NKD2, SLC12A7, MIR4635, SLC6A19, SLC6A18, TERT, MIR4457, CLPTM1L, SLC6A3, LPCAT1, SDHAP3, LOC728613, MIR4277, MRPL36, NDUFS6, IRX4, IRX2, C5orf38, LOC285577, IRX1, LOC340094, ADAMTS16, KIAA0947, FLJ33360, MED10, UBE2QL1, LOC255167, NSUN2, SRD5A1, …	SPINK7, SEPP1, TGFBI, PDGFRB, EGR1, EBF1, HDAC3, MSH3, ACSL6, DAB2, IQGAP2, TLX3, PTTG1, LOX, SNX2, IL3, MAPK9, APC, LIFR, NPM1, GNB2L1, CCNB1, NKX2-5, FST, NR3C1, CSF1R, IL7R, RANBP17, TSLP, IRF1, AFF4, FNIP1, SSBP2, ERCC8, MEF2C, PDCD6, VCAN, CSNK1A1, GZMA, TRIO, TNIP1, NSD1, ARHGAP26, ENC1, ITK, PRLR	hsa-mir-4277, hsa-mir-4278, SNORD123, hsa-mir-887, hsa-mir-4279, hsa-mir-579, hsa-mir-580, HBII-240, hsa-mir-1274a, hsa-mir-581, hsa-mir-449a, hsa-mir-449b, hsa-mir-449c, hsa-mir-582, HBI-115, U109, hsa-mir-4280, hsa-mir-9-2, hsa-mir-2277, hsa-mir-583, hsa-mir-548p, hsa-mir-548f-3, ACA13, hsa-mir-1244-2, hsa-mir-1289-2, hsa-mir-886, hsa-mir-874, U63, U19, hsa-mir-584, hsa-mir-143, hsa-mir-145, hs…		C-7RWCQ	chr5:113576-180678091
UPN22	Gain	3	6	q27	p25.3	1220	170763	155053	arr[hg19] 6p25.3q27(156,974-170,919,482)x3	DUSP22, IRF4, EXOC2, HUS1B, LOC285768, FOXQ1, FOXF2, FOXC1, GMDS, LOC100508120, C6orf195, MYLK4, WRNIP1, SERPINB1, MIR4645, MGC39372, SERPINB9, SERPINB6, DKFZP686I15217, NQO2, HTATSF1P2, RIPK1, BPHL, TUBB2A, LOC100507194, TUBB2B, PSMG4, SLC22A23, PXDC1, FAM50B, PRPF4B, FAM217A, C6orf201, ECI2, CDYL, RPP40, PPP1R3G, LYRM4, MIR3691, FARS2, NRN1, F13A1, LY86-AS1, LY86, RREB1, SSR1, CAGE1, RIOK1, DSP…	CD109, CEP85L, PPARD, CTGF, MLLT4, IGF2R, DAXX, CCND3, AHI1, BCLAF1, FOXO3, SOX4, ID4, LIN28B, CCNC, PLAGL1, FGFR1OP, SESN1, IRF4, TFAP2A, TNFAIP3, IER3, DEK, DDR1, CDKN1A, FANCE, LATS1, PRDM1, THBS2, DDX43, CITED2, BAK1, MYB, JARID2, CASP8AP2 , POLH, HIST1H2BH, WISP3, IL17A, HIST1H3F, HMGA1, EEF1A1, HFE, RUNX2, MAPK13, TFEB, ZFAND3, EPHA7, CAGE1, RNF217-AS1, hsa-mir-548a-2, AKAP12, AGER, MAP3K7,…	hsa-mir-548a-1, hsa-mir-3143, U32B, hsa-mir-877, U83, U84, ACA38, U48, U52, hsa-mir-1236, hsa-mir-219-1, hsa-mir-1275, hsa-mir-586, hsa-mir-206, hsa-mir-133b, hsa-mir-548u, hsa-mir-30c-2, hsa-mir-30a, hsa-mir-4282, U50, U50B, hsa-mir-2113, hsa-mir-587, hsa-mir-548b, hsa-mir-3144, hsa-mir-588, U101, HBII-429, ACA33, hsa-mir-548a-2, hsa-mir-3145, hsa-mir-1273c, hsa-mir-1202, ACA20, ACA29, hsa-mir-1…		C-5ELRJ	chr6:156974-170919482
UPN22	Gain	4	8	q24.3	p23.3	837	146138	125254	arr[hg19] 8p23.3q24.3(158,048-146,295,771)x4	RPL23AP53, ZNF596, FAM87A, FBXO25, TDRP, ERICH1, ERICH1-AS1, LOC286083, DLGAP2, CLN8, MIR596, ARHGEF10, KBTBD11, MYOM2, CSMD1, LOC100287015, MCPH1, ANGPT2, AGPAT5, MIR4659A, MIR4659B, XKR5, LOC100652791, DEFB1, DEFA6, DEFA4, DEFA8P, DEFA9P, DEFA10P, DEFA1, DEFA1B, DEFT1P, DEFT1P2, DEFA3, DEFA11P, DEFA5, LINC00965, FAM66B, DEFB109P1B, USP17L1P, USP17L4, ZNF705G, DEFB4B, DEFB103B, DEFB103A, SPAG11B…	PTK2, COX6C, DEFB1, MTUS1, ASH2L, NBN, RUNX1T1, ADAM9, NDRG1, TPD52, EIF4EBP1, PSCA, TP53INP1, TNFRSF11B, BOP1, LOXL2, FGFR1, MAFA, SNAI2, NCOA2, MYC, PTK2B, WRN, WHSC1L1, HAS2, RNF139, PCM1, IDO2, NAT2, PLAG1, TACC1, PAG1, NKX3-1, ENPP2, MCPH1, TOX, MYBL1, DLC1, IDO1, KAT6A, CTHRC1, EBAG9, RECQL4, CTSB, CYP7A1, NAT1, EXT1, CYP7B1, TNKS, KIAA1967, CLU, RHOBTB2, BAALC, GGH, WWP1, RAD21	hsa-mir-596, hsa-mir-548i-3, hsa-mir-597, hsa-mir-124-1, hsa-mir-4286, hsa-mir-1322, hsa-mir-598, hsa-mir-383, hsa-mir-548v, hsa-mir-320a, hsa-mir-548h-4, hsa-mir-4287, hsa-mir-4288, hsa-mir-3148, U13, hsa-mir-486, U54, hsa-mir-124-2, HBII-276, hsa-mir-2052, hsa-mir-3149, hsa-mir-3150, U72, hsa-mir-599, hsa-mir-875, hsa-mir-1273, hsa-mir-3151, hsa-mir-548a-3, hsa-mir-2053, hsa-mir-548d-1, hsa-mir…		C-3WEHE	chr8:158048-146295771
UPN22	Gain	3	10	q26.3	p15.3	921	135285	133193	arr[hg19] 10p15.3q26.3(142,391-135,427,143)x3	ZMYND11, DIP2C, MIR5699, PRR26, LARP4B, GTPBP4, IDI2, IDI2-AS1, IDI1, WDR37, LINC00200, ADARB2, ADARB2-AS1, LINC00700, LINC00701, PFKP, PITRM1, PITRM1-AS1, KLF6, LINC00704, LINC00705, AKR1E2, AKR1C6P, AKR1C1, AKR1C2, AKR1C3, AKR1CL1, AKR1C4, UCN3, TUBAL3, NET1, CALML5, CALML3, ASB13, FAM208B, GDI2, ANKRD16, FBXO18, IL15RA, IL2RA, RBM17, PFKFB3, MIR3155A, MIR3155B, LOC399715, PRKCQ, PRKCQ-AS1, LIN…	GATA3, SIRT1, MLLT10, FGFR2, DMBT1, KLF6, BNIP3, NT5C2, LGI1, ZMIZ1, HTRA1, TLX1, ADAM12, AKR1C3, KAT6B, ERCC6, NCOA4, AIFM2, ALOX5, PDCD4, DKK1, FGF8, LDB1, BMI1, PTEN, ARID5B, NET1, BLNK, BTRC, ADD3, LOXL4, SNCG, NFKB2, TET1, EIF3A, BAG3, PSAP, MXI1, PAX2, MRC1, RHOBTB1, MAPK8, CCDC6, ABI1, RET	hsa-mir-3155, hsa-mir-548q, hsa-mir-4293, hsa-mir-1265, hsa-mir-511-1, hsa-mir-511-2, hsa-mir-1915, hsa-mir-603, hsa-mir-604, hsa-mir-938, hsa-mir-3156-1, hsa-mir-4294, hsa-mir-605, hsa-mir-548f-1, hsa-mir-1296, HBII-419, hsa-mir-1254, hsa-mir-606, hsa-mir-346, hsa-mir-107, hsa-mir-3157, hsa-mir-607, hsa-mir-1287, U108, hsa-mir-608, hsa-mir-3158-2, hsa-mir-3158-1, hsa-mir-146b, hsa-mir-1307, hsa-…		C-5DPFD	chr10:142391-135427143
UPN22	Gain	3	11	q25	p15.5	1459	134708	136510	arr[hg19] 11p15.5q25(230,615-134,938,470)x3	SIRT3, PSMD13, NLRP6, ATHL1, IFITM5, IFITM2, IFITM1, IFITM3, B4GALNT4, PKP3, SIGIRR, ANO9, PTDSS2, RNH1, HRAS, LRRC56, C11orf35, RASSF7, MIR210HG, MIR210, LOC143666, PHRF1, IRF7, CDHR5, SCT, DRD4, DEAF1, TMEM80, EPS8L2, TALDO1, PDDC1, NS3BP, CEND1, SLC25A22, PIDD, RPLP2, SNORA52, PNPLA2, EFCAB4A, CD151, POLR2L, TSPAN4, CHID1, AP2A2, MUC6, MUC2, MUC5B, TOLLIP, TOLLIP-AS1, BRSK2, MOB2, DUSP8, KRTAP…	ARHGAP20, PTPRJ, ATM, MRE11A, CASP1, ZBTB16, FANCF, SPI1, OPCML, MUC6, KIAA1549L (C11orf41), KMT2A, CLP1, MUC2, VEGFB, LMO2, PAX6, MIR125B1, SPA17, DNAJC4, NUDT22, MLL, RAG1, DDB2, FKBP2, H2AFX, FAU, INPPL1, C11orf30, RELA, BIRC2, ORAOV1, MYEOV, CD82, NPAT, PAK1, FEN1, STIP1, CST6, RAD9A, DDX10, EIF3F, HTATIP2, PICALM, TAGLN, APLNR, PLCB3, RAG2, KAT5, GAB2, RRM1, CBL, CD248, B3GNT6, PPP1R14B, HRA…	hsa-mir-210, ACA52, hsa-mir-4298, hsa-mir-675, hsa-mir-483, ACA54, hsa-mir-302e, ACA3, ACA3-2, ACA23, U97, hsa-mir-4299, U14B, U14A, hsa-mir-3159, hsa-mir-610, hsa-mir-670, hsa-mir-129-2, hsa-mir-3160-1, hsa-mir-3160-2, HBII-166, hsa-mir-3161, hsa-mir-130a, hsa-mir-3162, hsa-mir-611, hsa-mir-1908, U99, U22, U31, U30, U29, U28, U27, U26, U25, hsa-mir-1237, hsa-mir-192, hsa-mir-194-2, hsa-mir-612, …		S-3EDHX	chr11:230615-134938470
UPN22	Gain	3	12	q24.33	p13.33	1184	133604	129778	arr[hg19] 12p13.33q24.33(173,786-133,777,902)x3	IQSEC3, LOC574538, SLC6A12, SLC6A13, KDM5A, CCDC77, B4GALNT3, NINJ2, WNK1, RAD52, ERC1, LINC00942, FBXL14, WNT5B, MIR3649, ADIPOR2, CACNA2D4, LRTM2, LINC00940, DCP1B, CACNA1C, CACNA1C-AS4, CACNA1C-IT3, CACNA1C-AS1, LOC283440, FKBP4, ITFG2, NRIP2, LOC100507424, FOXM1, RHNO1, TULP3, TEAD4, TSPAN9, PRMT8, EFCAB4B, PARP11, CCND2, C12orf5, FGF23, FGF6, C12orf4, RAD51AP1, DYRK4, AKAP3, NDUFA9, GALNT8, …	DDIT3, USP15, RAN, HNRNPA1 , P2RX7, ATF7IP, PTHLH, GLI1, AGAP2, FBRSL1, PEBP1, KITLG, ELK3, GUCY2C, HMGA2, ASCL1, SMARCC2, IL22, CCND2, ATF1, BTG1, KDM5A, SLC5A8, VWF, DRAM1, SOX5, PPFIBP1, GABARAPL1, IL23A, FOXM1, MDM2, KLRK1, BCL2L14, MIR200C, EP400, TSPAN8, ALDH2, ETNK1, RAP1B, CDKN1B, DUSP6, PTPN11, CHFR, ERC1, HOXC13, EPS8, CD9, SH2B3, CDK4, ETV6, PA2G4, PRKAB1, PXN, PAWR, ING4, METAP2, APAF…	U85, ACA57, hsa-mir-200c, hsa-mir-141, U89, hsa-mir-1244-3, hsa-mir-613, hsa-mir-614, hsa-mir-920, hsa-mir-4302, ACA34, hsa-mir-1291, ACA2a, ACA2b, hsa-mir-1293, hsa-mir-196a-2, hsa-mir-615, hsa-mir-148b, U59B, U59A, hsa-mir-1228, hsa-mir-616, hsa-mir-26a-2, hsa-let-7i, hsa-mir-548c, U70G, hsa-mir-1279, hsa-mir-1252, hsa-mir-617, hsa-mir-618, hsa-mir-492, hsa-mir-331, hsa-mir-1251, hsa-mir-135a-2…		C-7PNZW	chr12:173786-133777902
UPN22	Gain	3	14	q32.33	q11.2	770	86773.8	85690	arr[hg19] 14q11.2q32.33(20,511,672-107,285,437)x3	OR4L1, OR4K17, OR4N5, OR11G2, OR11H6, OR11H4, TTC5, CCNB1IP1, SNORD126, RPPH1, PARP2, TEP1, KLHL33, OSGEP, APEX1, TMEM55B, PNP, RNASE10, RNASE9, RNASE11, RNASE12, OR6S1, ANG, RNASE4, EDDM3A, EDDM3B, RNASE6, RNASE1, RNASE3, ECRP, RNASE2, METTL17, SLC39A2, NDRG2, TPPP2, RNASE13, RNASE7, RNASE8, ARHGEF40, ZNF219, TMEM253, OR5AU1, LINC00641, HNRNPC, RPGRIP1, SUPT16H, CHD8, SNORD9, SNORD8, RAB2B, TOX4…	PAX9, STRN3, NIN, GPHN, PTPN21, MTA1, JAG2, SEL1L, TRA, EML1, NDRG2, SIX1, DPF3, NUMB, VRK1, MMP14, TRAF3, FOXA1, TCL6, PRKD1, NKX2-1, FUT8, IGH@, TRA@, TRD@, TSHR, ANG, XRCC3, ZFP36L1, TCL1B, AKT1, OTX2, TCL1A, DIO2, TRD, GPR68, MEG3, BCL11B, TRIP11, LGALS3, ESR2, SAV1, IGH	hsa-mir-1201, SNORD126, mgU6-53B, mgU6-53, hsa-mir-208a, hsa-mir-208b, hsa-mir-4307, hsa-mir-3171, hsa-mir-624, hsa-mir-3172, SNORD127, hsa-mir-4308, hsa-mir-548h-1, hsa-mir-625, hsa-mir-1260, ACA65, SNORA11B, hsa-mir-3173, U93, hsa-mir-342, hsa-mir-345, hsa-mir-770, hsa-mir-493, hsa-mir-337, hsa-mir-665, hsa-mir-431, hsa-mir-433, hsa-mir-127, hsa-mir-432, hsa-mir-136, 14q(0), hsa-mir-370, 14q(I-…		S-3HXYB	chr14:20511672-107285437
UPN22	Gain	3	17	q25.3	p13.3	1373	81041.4	73347	arr[hg19] 17p13.3q25.3(525-81,041,938)x3	DOC2B, RPH3AL, LOC100506388, C17orf97, FAM101B, VPS53, FAM57A, GEMIN4, DBIL5P, GLOD4, RNMTL1, NXN, TIMM22, ABR, MIR3183, BHLHA9, TUSC5, YWHAE, CRK, MYO1C, INPP5K, PITPNA-AS1, PITPNA, SLC43A2, SCARF1, RILP, PRPF8, TLCD2, MIR22HG, MIR22, WDR81, SERPINF2, SERPINF1, SMYD4, RPA1, RTN4RL1, DPH1, OVCA2, MIR132, MIR212, HIC1, SMG6, SRR, TSR1, SNORD91B, SNORD91A, SGSM2, MNT, LOC284009, METTL16, PAFAH1B1, …	ALOX12, MLLT6, HLF, CRLF3, TP53, KSR1, BRCA1, PYY, PPM1D, FAM57A, RABEP1, GSDMA, TAF15, AATF, NF1, BCAS3, SPECC1, PER1, SLC9A3R1, RPL26, USP6, SHBG, PRKAR1A, RNF213, TIMP2, XAF1, IGF2BP1, RAD51D, STARD3, GRB2, HIC1, ELAC2, RAC3, SUZ12P, ERBB2, WRAP53, CASC3, SLC4A1, CLTC, SEPT9, CLDN7, TRIM37, DDX5, AXIN2, SRSF2, ALOX15, MSI2, ASPSCR1, MIR21, GAS7, NCOR1, ETV4, IKZF3, CDC6, KDM6B, RARA, TRPV1, LA…	hsa-mir-3183, hsa-mir-22, hsa-mir-132, hsa-mir-212, HBII-296B, HBII-296A, hsa-mir-1253, hsa-mir-195, hsa-mir-497, hsa-mir-324, ACA48, mgU6-77, U67, ACA68, hsa-mir-4314, U8, hsa-mir-744, hsa-mir-548h-3, hsa-mir-1288, U49B, U49A, HBII-135, hsa-mir-33b, U3-2, U3-2B, U3-4, U3, U3-3, hsa-mir-1180, ACA59B, U42B, mgh18S-121, U42A, Z17B, hsa-mir-451, hsa-mir-144, hsa-mir-423, hsa-mir-3184, hsa-mir-193a, …		S-4LRWR	chr17:525-81041938
UPN22	Gain	3	18	q23	p11.32	342	77877.9	66936	arr[hg19] 18p11.32q23(136,226-78,014,123)x3	USP14, THOC1, COLEC12, CETN1, CLUL1, C18orf56, TYMS, ENOSF1, YES1, ADCYAP1, LINC00470, METTL4, NDC80, CBX3P2, SMCHD1, EMILIN2, LPIN2, LOC727896, MYOM1, MYL12A, MYL12B, TGIF1, DLGAP1, DLGAP1-AS1, DLGAP1-AS3, DLGAP1-AS4, DLGAP1-AS5, C18orf42, LINC00526, LINC00667, ZBTB14, EPB41L3, LOC645355, MIR3976, TMEM200C, L3MBTL4, MIR4317, LOC100130480, ARHGAP28, LINC00668, LAMA1, LRRC30, PTPRM, LOC100192426, …	SS18, MBD2, MALT1, DSG2, GATA6, PHLPP1, DCC, PTPN2, MAPK4, SMAD4, SLC39A6, BCL2, SETBP1, SMAD2, EPB41L3, RBBP8, SERPINB5, ZNF521	hsa-mir-4317, hsa-mir-3156-2, hsa-mir-320c-1, hsa-mir-133a-1, hsa-mir-1-2, hsa-mir-320c-2, hsa-mir-302f, hsa-mir-187, hsa-mir-4318, hsa-mir-924, hsa-mir-4319, hsa-mir-1539, U58C, U58A, U58B, mgU12-22/U4-8, U91, hsa-mir-4320, ACA37, hsa-mir-122		C-6HGFA	chr18:136226-78014123
UPN22	Gain	4	21	q22.3	q11.2	293	33090.9	33620	arr[hg19] 21q11.2q22.3(15,006,457-48,097,372)x4	POTED, C21orf15, ANKRD20A11P, LIPI, RBM11, ABCC13, HSPA13, SAMSN1, SAMSN1-AS1, LOC388813, NRIP1, USP25, LINC00478, MIR99A, MIRLET7C, MIR125B2, C21orf37, CXADR, BTG3, C21orf91-OT1, C21orf91, CHODL-AS1, CHODL, TMPRSS15, LINC00320, NCAM2, RNU6-67P, LINC00317, LINC00308, D21S2088E, LOC339622, LINC00158, MIR155HG, MIR155, LINC00515, MRPL39, JAM2, ATP5J, GABPA, APP, CYYR1, ADAMTS1, ADAMTS5, MIR4759, MI…	U2AF1, PTTG1IP, TIAM1, MIR125B2, OLIG2, CSTB, ADAMTS1, NRIP1, TFF3, TFF2, TMPRSS3, ERG, ETS2, DYRK1A, TFF1, TMPRSS2, RUNX1, S100B	hsa-mir-3118-5, hsa-mir-99a, hsa-let-7c, hsa-mir-125b-2, hsa-mir-548x, hsa-mir-155, hsa-mir-4327, ACA67, hsa-mir-802, hsa-mir-3197		C-3ELOA	chr21:15006457-48097372
UPN22	Gain	3	X	q28	q21.31	486	63888.7	97606	arr[hg19] Xq21.31q28(91,345,057-155,233,731)x3	PCDH11X, NAP1L3, FAM133A, LOC643486, DIAPH2, RPA4, XRCC6P5, PCDH19, TNMD, TSPAN6, SRPX2, SYTL4, CSTF2, NOX1, XKRX, ARL13A, TRMT2B, TMEM35, CENPI, DRP2, TAF7L, TIMM8A, BTK, RPL36A, RPL36A-HNRNPH2, GLA, HNRNPH2, ARMCX4, ARMCX1, ARMCX6, ARMCX3, ARMCX2, NXF5, ZMAT1, TCEAL2, TCEAL6, BEX5, TCP11X2, NXF2B, NXF2, TMSB15A, NXF4, ARMCX5, ARMCX5-GPRASP2, GPRASP1, GPRASP2, BHLHB9, LINC00630, RAB40AL, BEX1, N…	PHF6, RPL10, GPC3, DKC1, L1CAM, STAG2, ARMCX1, MTCP1, SEPT6, RHOXF2, ARMCX3, AIFM1, ARMCX2, ELF4, Sep.06, ZBTB33, BTK, AMOT, SPANXA1	hsa-mir-548m, hsa-mir-652, U96b, hsa-mir-4329, HBI-36, hsa-mir-764, hsa-mir-1912, hsa-mir-1264, hsa-mir-1298, hsa-mir-1911, hsa-mir-448, hsa-mir-1277, hsa-mir-766, U69, hsa-mir-220a, hsa-mir-363, hsa-mir-92a-2, hsa-mir-19b-2, hsa-mir-20b, hsa-mir-18b, hsa-mir-106a, hsa-mir-450b, hsa-mir-450a-1, hsa-mir-450a-2, hsa-mir-542, hsa-mir-503, hsa-mir-424, hsa-mir-934, U61, hsa-mir-504, hsa-mir-505, hsa-…	C-7OQBL	C-6KTXX	chrX:91345057-155233731
UPN23	LOH		4	p16.3	p16.3	69	4147.77	663	arr[hg19] 4p16.3(46,690-4,194,462) hmz	ZNF595, ZNF718, ZNF876P, ZNF732, ZNF141, ABCA11P, ZNF721, PIGG, PDE6B, ATP5I, MYL5, MFSD7, PCGF3, LOC100129917, CPLX1, GAK, TMEM175, DGKQ, SLC26A1, IDUA, FGFRL1, RNF212, TMED11P, SPON2, LOC100130872, CTBP1, CTBP1-AS2, MAEA, UVSSA, CRIPAK, FAM53A, SLBP, TMEM129, TACC3, FGFR3, LETM1, WHSC1, SCARNA22, NELFA, MIR943, C4orf48, NAT8L, POLN, HAUS3, MXD4, MIR4800, ZFYVE28, LOC402160, RNF4, FAM193A, TNIP2…	FGFR3, WHSC1, TACC3	hsa-mir-571, ACA11, hsa-mir-943	S-3MFYM	S-3TYZH	chr4:46690-4194462
UPN23	LOH		5	q35.3	p15.33	1035	180579	49288	arr[hg19] 5p15.33q35.3(113,576-180,692,321) hmz	PLEKHG4B, LRRC14B, CCDC127, SDHA, PDCD6, AHRR, C5orf55, EXOC3, PP7080, SLC9A3, MIR4456, LOC100996325, CEP72, TPPP, ZDHHC11, BRD9, TRIP13, LOC100506688, NKD2, SLC12A7, MIR4635, SLC6A19, SLC6A18, TERT, MIR4457, CLPTM1L, SLC6A3, LPCAT1, SDHAP3, LOC728613, MIR4277, MRPL36, NDUFS6, IRX4, IRX2, C5orf38, LOC285577, IRX1, LOC340094, ADAMTS16, KIAA0947, FLJ33360, MED10, UBE2QL1, LOC255167, NSUN2, SRD5A1, …	SPINK7, SEPP1, TGFBI, PDGFRB, EGR1, EBF1, HDAC3, MSH3, ACSL6, DAB2, IQGAP2, TLX3, PTTG1, LOX, SNX2, IL3, MAPK9, APC, LIFR, NPM1, GNB2L1, CCNB1, NKX2-5, FST, NR3C1, CSF1R, IL7R, RANBP17, TSLP, IRF1, AFF4, FNIP1, SSBP2, ERCC8, MEF2C, PDCD6, VCAN, CSNK1A1, GZMA, TRIO, TNIP1, NSD1, ARHGAP26, ENC1, ITK, PRLR	hsa-mir-4277, hsa-mir-4278, SNORD123, hsa-mir-887, hsa-mir-4279, hsa-mir-579, hsa-mir-580, HBII-240, hsa-mir-1274a, hsa-mir-581, hsa-mir-449a, hsa-mir-449b, hsa-mir-449c, hsa-mir-582, HBI-115, U109, hsa-mir-4280, hsa-mir-9-2, hsa-mir-2277, hsa-mir-583, hsa-mir-548p, hsa-mir-548f-3, ACA13, hsa-mir-1244-2, hsa-mir-1289-2, hsa-mir-886, hsa-mir-874, U63, U19, hsa-mir-584, hsa-mir-143, hsa-mir-145, hs…		S-4LLYZ	chr5:113576-180692321
UPN23	LOH		6	p11.2	p12.3	47	7147.16	2217	arr[hg19] 6p12.3p11.2(49,963,248-57,110,411) hmz	DEFB110, DEFB112, TFAP2D, TFAP2B, PKHD1, MIR206, MIR133B, IL17A, IL17F, MCM3, PAQR8, EFHC1, TRAM2, TRAM2-AS1, LOC730101, TMEM14A, GSTA7P, GSTA2, GSTA1, GSTA5, GSTA3, GSTA4, ICK, FBXO9, GCM1, ELOVL5, MIR5685, RPS16P5, GCLC, KLHL31, LRRC1, MLIP-IT1, MLIP, TINAG, FAM83B, HCRTR2, GFRAL, HMGCLL1, BMP5, COL21A1, RNU6-71P, DST, BEND6, KIAA1586, ZNF451, BAG2, RAB23	IL17A	hsa-mir-206, hsa-mir-133b	S-3FTYA	S-3FACN	chr6:49963248-57110411
UPN23	LOH		7	q36.3	q36.3	20	3446.69	1017	arr[hg19] 7q36.3(155,672,527-159,119,220) hmz	LOC285889, LINC00244, C7orf13, RNF32, LMBR1, NOM1, MNX1, LOC645249, UBE3C, DNAJB6, PTPRN2, MIR153-2, LOC100506585, MIR595, MIR5707, NCAPG2, ESYT2, WDR60, LINC00689, VIPR2	MNX1	hsa-mir-153-2, hsa-mir-595	S-4IYTB	S-4TJRY	chr7:155672527-159119220
UPN23	LOH		8	p22	p23.3	127	16551.7	7037	arr[hg19] 8p23.3p22(168,483-16,720,206) hmz	RPL23AP53, ZNF596, FAM87A, FBXO25, TDRP, ERICH1, ERICH1-AS1, LOC286083, DLGAP2, CLN8, MIR596, ARHGEF10, KBTBD11, MYOM2, CSMD1, LOC100287015, MCPH1, ANGPT2, AGPAT5, MIR4659A, MIR4659B, XKR5, LOC100652791, DEFB1, DEFA6, DEFA4, DEFA8P, DEFA9P, DEFA10P, DEFA1, DEFA1B, DEFT1P, DEFT1P2, DEFA3, DEFA11P, DEFA5, LINC00965, FAM66B, DEFB109P1B, USP17L1P, USP17L4, ZNF705G, DEFB4B, DEFB103B, DEFB103A, SPAG11B…	DEFB1, MCPH1, DLC1, CTSB, TNKS	hsa-mir-596, hsa-mir-548i-3, hsa-mir-597, hsa-mir-124-1, hsa-mir-4286, hsa-mir-1322, hsa-mir-598, hsa-mir-383		S-3DXLU	chr8:168483-16720206
UPN23	LOH		9	p23	p24.3	42	12088.5	5219	arr[hg19] 9p24.3p23(192,128-12,280,677) hmz	C9orf66, DOCK8, KANK1, DMRT1, DMRT3, DMRT2, SMARCA2, FLJ35024, VLDLR, KCNV2, KIAA0020, RFX3, GLIS3, GLIS3-AS1, SLC1A1, SPATA6L, PPAPDC2, CDC37L1, AK3, RCL1, MIR101-2, JAK2, INSL6, INSL4, RLN2, RLN1, PLGRKT, CD274, PDCD1LG2, KIAA1432, ERMP1, MLANA, KIAA2026, MIR4665, RANBP6, IL33, TPD52L3, UHRF2, GLDC, KDM4C, C9orf123, PTPRD	PTPRD, RLN2, JAK2, KDM4C	hsa-mir-101-2	S-3UNQB	S-4QUUO	chr9:192128-12280677
UPN23	LOH		9	q33.1	q31.1	117	16810.1	4895	arr[hg19] 9q31.1q33.1(102,703,491-119,513,630) hmz	STX17, ERP44, INVS, TEX10, MSANTD3, MSANTD3-TMEFF1, TMEFF1, MURC, LPPR1, BAAT, MRPL50, ZNF189, ALDOB, TMEM246, RNF20, GRIN3A, PPP3R2, CYLC2, SMC2, OR13F1, OR13C4, OR13C3, OR13C8, OR13C5, OR13C2, OR13C9, OR13D1, NIPSNAP3A, NIPSNAP3B, LOC286367, ABCA1, SLC44A1, FSD1L, FKTN, TAL2, TMEM38B, ZNF462, MIR548Q, RAD23B, KLF4, ACTL7B, ACTL7A, IKBKAP, FAM206A, CTNNAL1, TMEM245, MIR32, FRRS1L, EPB41L4B, PTPN…	TXN, TNFSF15, TAL2, KLF4, ALDOB, TNC, LPAR1	hsa-mir-32, hsa-mir-455	S-3EVXP	S-4DMCF	chr9:102703491-119513630
UPN23	LOH		9	q33.3	q33.2	58	4586.41	993	arr[hg19] 9q33.2q33.3(124,579,720-129,166,134) hmz	TTLL11, MIR4478, NDUFA8, MORN5, LHX6, RBM18, MRRF, PTGS1, OR1J1, OR1J2, OR1J4, OR1N1, OR1N2, OR1L8, OR1Q1, OR1B1, OR1L1, OR1L3, OR1L4, OR1L6, OR5C1, OR1K1, PDCL, RC3H2, SNORD90, ZBTB6, ZBTB26, RABGAP1, GPR21, MIR600HG, MIR600, STRBP, CRB2, DENND1A, MIR601, LHX2, NEK6, PSMB7, LOC100129034, GPR144, NR5A1, NR6A1, MIR181A2HG, MIR181A2, MIR181B2, OLFML2A, WDR38, RPL35, ARPC5L, GOLGA1, SCAI, PPP6C, RAB…	HSPA5	HBII-295, hsa-mir-600, hsa-mir-601, hsa-mir-181a-2, hsa-mir-181b-2	S-3HFDH	S-3IEQB	chr9:124579720-129166134
UPN23	LOH		9	q34.3	q34.11	83	5578.14	989	arr[hg19] 9q34.11q34.3(131,862,072-137,440,212) hmz	CRAT, PPP2R4, IER5L, C9orf106, LINC00963, C9orf50, NTMT1, ASB6, PRRX2, PTGES, TOR1B, TOR1A, C9orf78, USP20, FNBP1, GPR107, NCS1, ASS1, LOC100272217, FUBP3, PRDM12, EXOSC2, ABL1, QRFP, FIBCD1, LAMC3, AIF1L, NUP214, FAM78A, PPAPDC3, PRRC2B, SNORD62B, SNORD62A, POMT1, UCK1, RAPGEF1, MED27, NTNG2, SETX, TTF1, C9orf171, BARHL1, DDX31, GTF3C4, AK8, C9orf9, TSC1, GFI1B, GTF3C5, CEL, CELP, RALGDS, GBGT1,…	NUP214, FNBP1, RAPGEF1, ABL1, GFI1B, PRRX2, TSC1, PPP2R4	U62A, U62B, U24, U36B, U36A, U36C	S-4BWHM	S-3OHLM	chr9:131862072-137440212
UPN23	LOH		12	q13.3	p11.22	334	27607.6	5957	arr[hg19] 12p11.22q13.3(30,235,420-57,843,014) hmz	IPO8, CAPRIN2, LINC00941, TSPAN11, DDX11-AS1, DDX11, FAM60A, FLJ13224, DENND5B, DENND5B-AS1, METTL20, AMN1, H3F3C, KIAA1551, RNU6-78P, BICD1, FGD4, DNM1L, YARS2, PKP2, SYT10, ALG10, ALG10B, CPNE8, KIF21A, ABCD2, C12orf40, SLC2A13, LRRK2, CNTN1, PDZRN4, GXYLT1, YAF2, ZCRB1, PPHLN1, PRICKLE1, ADAMTS20, PUS7L, IRAK4, TWF1, TMEM117, NELL2, DBX2, RACGAP1P, PLEKHA8P1, RNY5, ANO6, LINC00938, ARID2, SCAF…	HNRNPA1 , SMARCC2, ATF1, IL23A, HOXC13, PA2G4, HOXC11, SARNP	ACA34, hsa-mir-1291, ACA2a, ACA2b, hsa-mir-1293, hsa-mir-196a-2, hsa-mir-615, hsa-mir-148b, U59B, U59A, hsa-mir-1228	S-4DIUD	S-4RUVS	chr12:30235420-57843014
UPN23	LOH		12	q21.33	q14.2	115	27243.3	6965	arr[hg19] 12q14.2q21.33(65,082,764-92,326,064) hmz	RASSF3, GNS, TBC1D30, FLJ41278, WIF1, LEMD3, MSRB3, RPSAP52, HMGA2, LLPH, TMBIM4, IRAK3, HELB, GRIP1, CAND1, DYRK2, IFNG, IL26, IL22, MDM1, RAP1B, SNORA70G, LOC100507250, NUP107, SLC35E3, LOC100130075, MDM2, CPM, CPSF6, MIR1279, LYZ, YEATS4, FRS2, MIR3913-1, MIR3913-2, CCT2, LRRC10, BEST3, RAB3IP, CNOT2, KCNMB4, PTPRB, PTPRR, TSPAN8, LGR5, ZFC3H1, THAP2, TMEM19, RAB21, TBC1D15, MRS2P2, TPH2, TRHD…	KITLG, HMGA2, IL22, MDM2, TSPAN8, RAP1B, DUSP6, PAWR	U70G, hsa-mir-1279, hsa-mir-1252, hsa-mir-617, hsa-mir-618	S-3HHKZ	S-4QXUZ	chr12:65082764-92326064
UPN23	LOH		13	q21.33	q21.1	13	12331.8	3197	arr[hg19] 13q21.1q21.33(57,962,532-70,294,289) hmz	PCDH17, DIAPH3, DIAPH3-AS1, DIAPH3-AS2, TDRD3, MIR3169, PCDH20, OR7E156P, PCDH9, PCDH9-AS2, PCDH9-AS3, LINC00550, KLHL1		hsa-mir-3169	S-4SOKI	S-3GPBI	chr13:57962532-70294289
UPN23	LOH		13	q34	q33.1	35	8888.87	3292	arr[hg19] 13q33.1q34(103,352,682-112,241,549) hmz	CCDC168, TEX30, KDELC1, BIVM, BIVM-ERCC5, ERCC5, METTL21EP, SLC10A2, MIR548AS, DAOA-AS1, DAOA, LINC00343, LINC00460, EFNB2, ARGLU1, LINC00551, LINC00443, FAM155A, LIG4, ABHD13, TNFSF13B, MYO16, MYO16-AS1, IRS2, COL4A1, COL4A2, COL4A2-AS1, RAB20, CARKD, CARS2, ING1, LINC00346, ANKRD10, ARHGEF7, TEX29	ERCC5	hsa-mir-1267	S-4KRAR	S-4MBBZ	chr13:103352682-112241549
UPN23	LOH		15	q26.3	q11.2	807	79676.7	24981	arr[hg19] 15q11.2q26.3(22,752,398-102,429,049) hmz	TUBGCP5, CYFIP1, NIPA2, NIPA1, LOC283683, WHAMMP3, GOLGA8I, HERC2P2, HERC2P7, GOLGA8EP, LOC440243, GOLGA8S, MIR4508, MKRN3, MAGEL2, NDN, PWRN2, PWRN1, NPAP1, SNRPN, SNURF, SNORD107, PWARSN, PWAR5, SNORD64, SNORD108, SNORD109A, SNORD109B, SNORD116-1, SNORD116-2, SNORD116-3, SNORD116-9, SNORD116-4, SNORD116-5, SNORD116-7, SNORD116-6, SNORD116-8, SNORD116-10, SNORD116-11, SNORD116-12, SNORD116-13, S…	MAPK6, KIAA0101, TCF12, ITGA11, IDH2, ADAM10, ITPKA, SHC4, BLM, LTK, UBE3A, PML, CTSH, BUB1B, CASC5, IGF1R, SPINT1, NEIL1, THBS1, GOLGA6A, RASGRF1, TYRO3, GCNT3, COPS2, SPRED1, PLCB2, BMF, hsa-mir-626, ATP10A, TRPM1, PKM2, NTRK3, C15orf55	HBII-436, HBII-13, HBII-437, HBII-438A, HBII-85-1, HBII-85-2, HBII-85-3, HBII-85-4, HBII-85-5, HBII-85-6, HBII-85-7, HBII-85-8, HBII-85-9, HBII-85-10, HBII-85-11, HBII-85-12, HBII-85-13, HBII-85-14, HBII-85-15, HBII-85-16, HBII-85-17, HBII-85-18, HBII-85-19, HBII-85-20, HBII-85-21, HBII-85-22, HBII-85-23, HBII-85-24, HBII-85-25, HBII-85-26, HBII-85-27, HBII-85-28, HBII-85-29, HBII-52-1, HBII-52-2…		S-3ERSU	chr15:22752398-102429049
UPN23	LOH		17	q25.3	p13.3	1373	81023	18572	arr[hg19] 17p13.3q25.3(18,900-81,041,938) hmz	DOC2B, RPH3AL, LOC100506388, C17orf97, FAM101B, VPS53, FAM57A, GEMIN4, DBIL5P, GLOD4, RNMTL1, NXN, TIMM22, ABR, MIR3183, BHLHA9, TUSC5, YWHAE, CRK, MYO1C, INPP5K, PITPNA-AS1, PITPNA, SLC43A2, SCARF1, RILP, PRPF8, TLCD2, MIR22HG, MIR22, WDR81, SERPINF2, SERPINF1, SMYD4, RPA1, RTN4RL1, DPH1, OVCA2, MIR132, MIR212, HIC1, SMG6, SRR, TSR1, SNORD91B, SNORD91A, SGSM2, MNT, LOC284009, METTL16, PAFAH1B1, …	ALOX12, MLLT6, HLF, CRLF3, TP53, KSR1, BRCA1, PYY, PPM1D, FAM57A, RABEP1, GSDMA, TAF15, AATF, NF1, BCAS3, SPECC1, PER1, SLC9A3R1, RPL26, USP6, SHBG, PRKAR1A, RNF213, TIMP2, XAF1, IGF2BP1, RAD51D, STARD3, GRB2, HIC1, ELAC2, RAC3, SUZ12P, ERBB2, WRAP53, CASC3, SLC4A1, CLTC, SEPT9, CLDN7, TRIM37, DDX5, AXIN2, SRSF2, ALOX15, MSI2, ASPSCR1, MIR21, GAS7, NCOR1, ETV4, IKZF3, CDC6, KDM6B, RARA, TRPV1, LA…	hsa-mir-3183, hsa-mir-22, hsa-mir-132, hsa-mir-212, HBII-296B, HBII-296A, hsa-mir-1253, hsa-mir-195, hsa-mir-497, hsa-mir-324, ACA48, mgU6-77, U67, ACA68, hsa-mir-4314, U8, hsa-mir-744, hsa-mir-548h-3, hsa-mir-1288, U49B, U49A, HBII-135, hsa-mir-33b, U3-2, U3-2B, U3-4, U3, U3-3, hsa-mir-1180, ACA59B, U42B, mgh18S-121, U42A, Z17B, hsa-mir-451, hsa-mir-144, hsa-mir-423, hsa-mir-3184, hsa-mir-193a, …		S-4LRWR	chr17:18900-81041938
UPN23	LOH		18	p11.21	p11.22	32	4469.8	1095	arr[hg19] 18p11.22p11.21(10,673,917-15,143,714) hmz	PIEZO2, GNAL, CHMP1B, MPPE1, IMPA2, ANKRD62, C18orf61, CIDEA, TUBB6, AFG3L2, SLMO1, SPIRE1, PSMG2, CEP76, PTPN2, SEH1L, CEP192, LDLRAD4, LDLRAD4-AS1, MIR5190, MIR4526, FAM210A, RNMT, MC5R, MC2R, ZNF519, ANKRD20A5P, CYP4F35P, CXADRP3, POTEC, ANKRD30B, MIR3156-2	PTPN2	hsa-mir-3156-2	S-4STGV	S-4EJWX	chr18:10673917-15143714
UPN23	LOH		19	q13.43	q13.42	215	4876.45	1449	arr[hg19] 19q13.42q13.43(54,221,300-59,097,752) hmz	MIR520D, MIR517B, MIR520G, MIR516B2, MIR526A2, MIR518E, MIR518A1, MIR518D, MIR516B1, MIR518A2, MIR517C, MIR520H, MIR521-1, MIR522, MIR519A1, MIR527, MIR516A1, MIR1283-2, MIR516A2, MIR519A2, MIR371A, MIR371B, MIR372, MIR373, NLRP12, MYADM, PRKCG, CACNG7, CACNG8, MIR935, CACNG6, VSTM1, TARM1, OSCAR, NDUFA3, TFPT, PRPF31, CNOT3, LENG1, TMC4, MBOAT7, TSEN34, RPS9, LILRB3, LILRA6, LILRB5, LILRB2, MIR4…	TFPT, PEG3, CNOT3	hsa-mir-520d, hsa-mir-517b, hsa-mir-520g, hsa-mir-516b-2, hsa-mir-526a-2, hsa-mir-518e, hsa-mir-518a-1, hsa-mir-518d, hsa-mir-516b-1, hsa-mir-518a-2, hsa-mir-517c, hsa-mir-520h, hsa-mir-521-1, hsa-mir-522, hsa-mir-519a-1, hsa-mir-527, hsa-mir-516a-1, hsa-mir-1283-2, hsa-mir-516a-2, hsa-mir-519a-2, hsa-mir-371, hsa-mir-372, hsa-mir-373, hsa-mir-935, hsa-mir-1274b	S-3LOZQ	S-3PNCX	chr19:54221300-59097752
UPN23	LOH		22	q13.33	q11.1	543	34300.8	8780	arr[hg19] 22q11.1q13.33(16,877,134-51,177,928) hmz	CCT8L2, TPTEP1, ANKRD62P1-PARP4P3, XKR3, HSFY1P1, GAB4, CECR7, IL17RA, CECR6, CECR5, CECR5-AS1, CECR1, CECR3, CECR2, SLC25A18, ATP6V1E1, BCL2L13, BID, MIR3198-1, LINC00528, MICAL3, MIR648, FLJ41941, PEX26, TUBA8, USP18, GGT3P, DGCR6, PRODH, DGCR5, DGCR9, DGCR10, DGCR2, DGCR11, DGCR14, TSSK2, GSC2, SLC25A1, CLTCL1, HIRA, MRPL40, C22orf39, UFD1L, CDC45, CLDN5, LINC00895, SEPT5, SEPT5-GP1BB, GP1BB, …	BCR, MCM5, MKL1, SMARCB1, RAC2, MAPK1, PARVB, VPREB1, MIF, EWSR1, IL2RB, CHEK2, PDGFB, SEPT5, IGL@, MYH9, XRCC6, TYMP, RBX1, CLTCL1, MMP11, BRD1, Sep.05, MN1, FBLN1, NF2, IGLL1, MAPK12, ATF4, SOX10, EP300	hsa-mir-3198, hsa-mir-648, hsa-mir-185, hsa-mir-1306, hsa-mir-1286, hsa-mir-649, hsa-mir-301b, hsa-mir-130b, hsa-mir-650, hsa-mir-548j, hsa-mir-3199-1, hsa-mir-3199-2, SNORD125, hsa-mir-3200, hsa-mir-658, hsa-mir-659, U83B, U83A, U43, hsa-mir-1281, hsa-mir-33a, hsa-mir-1249, hsa-let-7a-3, hsa-let-7b, hsa-mir-3201		S-3GRGV	chr22:16877134-51177928
UPN23	GainMosaic	2.42351	9	q34.3	p24.3	961	140817	100046	arr[hg19] 9p24.3q34.3(203,861-141,020,389)x2-3	C9orf66, DOCK8, KANK1, DMRT1, DMRT3, DMRT2, SMARCA2, FLJ35024, VLDLR, KCNV2, KIAA0020, RFX3, GLIS3, GLIS3-AS1, SLC1A1, SPATA6L, PPAPDC2, CDC37L1, AK3, RCL1, MIR101-2, JAK2, INSL6, INSL4, RLN2, RLN1, PLGRKT, CD274, PDCD1LG2, KIAA1432, ERMP1, MLANA, KIAA2026, MIR4665, RANBP6, IL33, TPD52L3, UHRF2, GLDC, KDM4C, C9orf123, PTPRD, TYRP1, LURAP1L, MPDZ, FLJ41200, LINC00583, NFIB, ZDHHC21, CER1, FREM1, L…	SH3GL2, HSPA5, CDK20, GNAQ, TXN, ANXA1, NUP214, RMRP, WNK2, PAX5, FANCC, CDKN2B, TEK, MIR7-1, NR4A3, ROR2, TNFSF15, DAB2IP, BAG1, FNBP1, PTPRD, RAPGEF1, NOTCH1, PAEP, SEMA4D, FOXE1, CKS2, CDKN2A, TAL2, RLN2, ABL1, PTCH1, SYK, IL11RA, PSIP1, MLLT3, KLF4, GFI1B, FAM22F, JAK2, MIR126, IFNA1, MLLT3 (AF9), TJP2, SIGMAR1, ALDOB, STOML2, DAPK1, CTSL1, PRRX2, TSC1, TNC, CCL27, FANCG, XPA, TOPORS, CNTRL, …	hsa-mir-101-2, hsa-mir-3152, U92, hsa-mir-491, hsa-mir-31, hsa-mir-876, hsa-mir-873, SNORD121B, SNORD121A, hsa-mir-1299, hsa-mir-204, hsa-mir-7-1, hsa-mir-4289, hsa-mir-3153, hsa-mir-4290, SNORA84, hsa-mir-4291, hsa-let-7a-1, hsa-let-7f-1, hsa-let-7d, hsa-mir-2278, hsa-mir-23b, hsa-mir-27b, hsa-mir-3074, hsa-mir-24-1, hsa-mir-1302-8, hsa-mir-32, hsa-mir-455, U70C, hsa-mir-147, HBII-295, hsa-mir-6…		C-5LURI	chr9:203861-141020389
UPN23	Loss	1	7	q36.1	q36.1	2	67.396	76	arr[hg19] 7q36.1(148,447,222-148,514,618)x1	CUL1, EZH2	EZH2, EZH2, EZH2, EZH2		C-7GFML	S-4EHBF	chr7:148447222-148514618
UPN23	Loss	1	11	p12	p12	3	37.598	64	arr[hg19] 11p12(36,600,515-36,638,113)x1	RAG1, RAG2, C11orf74	RAG2, RAG1		S-3UEIO	S-4FFSZ	chr11:36600515-36638113
UPN23	Gain	3	4	q35.2	p16.3	891	190889	153163	arr[hg19] 4p16.3q35.2(68,345-190,957,473)x3	ZNF595, ZNF718, ZNF876P, ZNF732, ZNF141, ABCA11P, ZNF721, PIGG, PDE6B, ATP5I, MYL5, MFSD7, PCGF3, LOC100129917, CPLX1, GAK, TMEM175, DGKQ, SLC26A1, IDUA, FGFRL1, RNF212, TMED11P, SPON2, LOC100130872, CTBP1, CTBP1-AS2, MAEA, UVSSA, CRIPAK, FAM53A, SLBP, TMEM129, TACC3, FGFR3, LETM1, WHSC1, SCARNA22, NELFA, MIR943, C4orf48, NAT8L, POLN, HAUS3, MXD4, MIR4800, ZFYVE28, LOC402160, RNF4, FAM193A, TNIP2…	S100P, RCHY1, FGF2, FGFR3, FIP1L1, RASSF6, CHIC2, SYNPO2, FRYL, REST, TET2, MAD2L1, NR3C2, NUDT6, FAT1, KIT, WHSC1, AFF1, NFKB1, ING2, RAP1GDS1, EIF4E, AREG, LEF1, FBXW7, SORBS2, PDGFRA, TACC3, HNRNPD, NPY1R, RASL11B, RHOH, PTPN13, MAPK10, SPP1	hsa-mir-571, ACA11, hsa-mir-943, hsa-mir-4274, hsa-mir-95, hsa-mir-548i-2, hsa-mir-3138, hsa-mir-572, hsa-mir-218-1, hsa-mir-573, hsa-mir-4275, hsa-mir-1255b-1, hsa-mir-574, HBI-6, hsa-mir-1269, hsa-mir-575, hsa-mir-1255a, hsa-mir-576, hsa-mir-297, hsa-mir-367, hsa-mir-302d, hsa-mir-302a, hsa-mir-302c, hsa-mir-302b, hsa-mir-1243, hsa-mir-577, hsa-mir-1973, ACA24, hsa-mir-2054, hsa-mir-3139, hsa-m…		C-7HDOD	chr4:68345-190957473
UPN23	Gain	3	6	q27	p25.3	1220	170763	155053	arr[hg19] 6p25.3q27(156,974-170,919,482)x3	DUSP22, IRF4, EXOC2, HUS1B, LOC285768, FOXQ1, FOXF2, FOXC1, GMDS, LOC100508120, C6orf195, MYLK4, WRNIP1, SERPINB1, MIR4645, MGC39372, SERPINB9, SERPINB6, DKFZP686I15217, NQO2, HTATSF1P2, RIPK1, BPHL, TUBB2A, LOC100507194, TUBB2B, PSMG4, SLC22A23, PXDC1, FAM50B, PRPF4B, FAM217A, C6orf201, ECI2, CDYL, RPP40, PPP1R3G, LYRM4, MIR3691, FARS2, NRN1, F13A1, LY86-AS1, LY86, RREB1, SSR1, CAGE1, RIOK1, DSP…	CD109, CEP85L, PPARD, CTGF, MLLT4, IGF2R, DAXX, CCND3, AHI1, BCLAF1, FOXO3, SOX4, ID4, LIN28B, CCNC, PLAGL1, FGFR1OP, SESN1, IRF4, TFAP2A, TNFAIP3, IER3, DEK, DDR1, CDKN1A, FANCE, LATS1, PRDM1, THBS2, DDX43, CITED2, BAK1, MYB, JARID2, CASP8AP2 , POLH, HIST1H2BH, WISP3, IL17A, HIST1H3F, HMGA1, EEF1A1, HFE, RUNX2, MAPK13, TFEB, ZFAND3, EPHA7, CAGE1, RNF217-AS1, hsa-mir-548a-2, AKAP12, AGER, MAP3K7,…	hsa-mir-548a-1, hsa-mir-3143, U32B, hsa-mir-877, U83, U84, ACA38, U48, U52, hsa-mir-1236, hsa-mir-219-1, hsa-mir-1275, hsa-mir-586, hsa-mir-206, hsa-mir-133b, hsa-mir-548u, hsa-mir-30c-2, hsa-mir-30a, hsa-mir-4282, U50, U50B, hsa-mir-2113, hsa-mir-587, hsa-mir-548b, hsa-mir-3144, hsa-mir-588, U101, HBII-429, ACA33, hsa-mir-548a-2, hsa-mir-3145, hsa-mir-1273c, hsa-mir-1202, ACA20, ACA29, hsa-mir-1…		C-5ELRJ	chr6:156974-170919482
UPN23	Gain	2.32	9	q34.3	p24.3	961	140817	100046	arr[hg19] 9p24.3q34.3(203,861-141,020,389)x2-3	C9orf66, DOCK8, KANK1, DMRT1, DMRT3, DMRT2, SMARCA2, FLJ35024, VLDLR, KCNV2, KIAA0020, RFX3, GLIS3, GLIS3-AS1, SLC1A1, SPATA6L, PPAPDC2, CDC37L1, AK3, RCL1, MIR101-2, JAK2, INSL6, INSL4, RLN2, RLN1, PLGRKT, CD274, PDCD1LG2, KIAA1432, ERMP1, MLANA, KIAA2026, MIR4665, RANBP6, IL33, TPD52L3, UHRF2, GLDC, KDM4C, C9orf123, PTPRD, TYRP1, LURAP1L, MPDZ, FLJ41200, LINC00583, NFIB, ZDHHC21, CER1, FREM1, L…	SH3GL2, HSPA5, CDK20, GNAQ, TXN, ANXA1, NUP214, RMRP, WNK2, PAX5, FANCC, CDKN2B, TEK, MIR7-1, NR4A3, ROR2, TNFSF15, DAB2IP, BAG1, FNBP1, PTPRD, RAPGEF1, NOTCH1, PAEP, SEMA4D, FOXE1, CKS2, CDKN2A, TAL2, RLN2, ABL1, PTCH1, SYK, IL11RA, PSIP1, MLLT3, KLF4, GFI1B, FAM22F, JAK2, MIR126, IFNA1, MLLT3 (AF9), TJP2, SIGMAR1, ALDOB, STOML2, DAPK1, CTSL1, PRRX2, TSC1, TNC, CCL27, FANCG, XPA, TOPORS, CNTRL, …	hsa-mir-101-2, hsa-mir-3152, U92, hsa-mir-491, hsa-mir-31, hsa-mir-876, hsa-mir-873, SNORD121B, SNORD121A, hsa-mir-1299, hsa-mir-204, hsa-mir-7-1, hsa-mir-4289, hsa-mir-3153, hsa-mir-4290, SNORA84, hsa-mir-4291, hsa-let-7a-1, hsa-let-7f-1, hsa-let-7d, hsa-mir-2278, hsa-mir-23b, hsa-mir-27b, hsa-mir-3074, hsa-mir-24-1, hsa-mir-1302-8, hsa-mir-32, hsa-mir-455, U70C, hsa-mir-147, HBII-295, hsa-mir-6…		C-5LURI	chr9:203861-141020389
UPN23	Gain	3	10	q26.3	p15.3	921	135283	133185	arr[hg19] 10p15.3q26.3(143,737-135,427,143)x3	ZMYND11, DIP2C, MIR5699, PRR26, LARP4B, GTPBP4, IDI2, IDI2-AS1, IDI1, WDR37, LINC00200, ADARB2, ADARB2-AS1, LINC00700, LINC00701, PFKP, PITRM1, PITRM1-AS1, KLF6, LINC00704, LINC00705, AKR1E2, AKR1C6P, AKR1C1, AKR1C2, AKR1C3, AKR1CL1, AKR1C4, UCN3, TUBAL3, NET1, CALML5, CALML3, ASB13, FAM208B, GDI2, ANKRD16, FBXO18, IL15RA, IL2RA, RBM17, PFKFB3, MIR3155A, MIR3155B, LOC399715, PRKCQ, PRKCQ-AS1, LIN…	GATA3, SIRT1, MLLT10, FGFR2, DMBT1, KLF6, BNIP3, NT5C2, LGI1, ZMIZ1, HTRA1, TLX1, ADAM12, AKR1C3, KAT6B, ERCC6, NCOA4, AIFM2, ALOX5, PDCD4, DKK1, FGF8, LDB1, BMI1, PTEN, ARID5B, NET1, BLNK, BTRC, ADD3, LOXL4, SNCG, NFKB2, TET1, EIF3A, BAG3, PSAP, MXI1, PAX2, MRC1, RHOBTB1, MAPK8, CCDC6, ABI1, RET	hsa-mir-3155, hsa-mir-548q, hsa-mir-4293, hsa-mir-1265, hsa-mir-511-1, hsa-mir-511-2, hsa-mir-1915, hsa-mir-603, hsa-mir-604, hsa-mir-938, hsa-mir-3156-1, hsa-mir-4294, hsa-mir-605, hsa-mir-548f-1, hsa-mir-1296, HBII-419, hsa-mir-1254, hsa-mir-606, hsa-mir-346, hsa-mir-107, hsa-mir-3157, hsa-mir-607, hsa-mir-1287, U108, hsa-mir-608, hsa-mir-3158-2, hsa-mir-3158-1, hsa-mir-146b, hsa-mir-1307, hsa-…		C-5DPFD	chr10:143737-135427143
UPN23	Gain	3	14	q32.33	q11.2	770	86773.8	85690	arr[hg19] 14q11.2q32.33(20,511,672-107,285,437)x3	OR4L1, OR4K17, OR4N5, OR11G2, OR11H6, OR11H4, TTC5, CCNB1IP1, SNORD126, RPPH1, PARP2, TEP1, KLHL33, OSGEP, APEX1, TMEM55B, PNP, RNASE10, RNASE9, RNASE11, RNASE12, OR6S1, ANG, RNASE4, EDDM3A, EDDM3B, RNASE6, RNASE1, RNASE3, ECRP, RNASE2, METTL17, SLC39A2, NDRG2, TPPP2, RNASE13, RNASE7, RNASE8, ARHGEF40, ZNF219, TMEM253, OR5AU1, LINC00641, HNRNPC, RPGRIP1, SUPT16H, CHD8, SNORD9, SNORD8, RAB2B, TOX4…	PAX9, STRN3, NIN, GPHN, PTPN21, MTA1, JAG2, SEL1L, TRA, EML1, NDRG2, SIX1, DPF3, NUMB, VRK1, MMP14, TRAF3, FOXA1, TCL6, PRKD1, NKX2-1, FUT8, IGH@, TRA@, TRD@, TSHR, ANG, XRCC3, ZFP36L1, TCL1B, AKT1, OTX2, TCL1A, DIO2, TRD, GPR68, MEG3, BCL11B, TRIP11, LGALS3, ESR2, SAV1, IGH	hsa-mir-1201, SNORD126, mgU6-53B, mgU6-53, hsa-mir-208a, hsa-mir-208b, hsa-mir-4307, hsa-mir-3171, hsa-mir-624, hsa-mir-3172, SNORD127, hsa-mir-4308, hsa-mir-548h-1, hsa-mir-625, hsa-mir-1260, ACA65, SNORA11B, hsa-mir-3173, U93, hsa-mir-342, hsa-mir-345, hsa-mir-770, hsa-mir-493, hsa-mir-337, hsa-mir-665, hsa-mir-431, hsa-mir-433, hsa-mir-127, hsa-mir-432, hsa-mir-136, 14q(0), hsa-mir-370, 14q(I-…		S-3HXYB	chr14:20511672-107285437
UPN23	Gain	3	18	q23	p11.32	342	77877.9	66936	arr[hg19] 18p11.32q23(136,226-78,014,123)x3	USP14, THOC1, COLEC12, CETN1, CLUL1, C18orf56, TYMS, ENOSF1, YES1, ADCYAP1, LINC00470, METTL4, NDC80, CBX3P2, SMCHD1, EMILIN2, LPIN2, LOC727896, MYOM1, MYL12A, MYL12B, TGIF1, DLGAP1, DLGAP1-AS1, DLGAP1-AS3, DLGAP1-AS4, DLGAP1-AS5, C18orf42, LINC00526, LINC00667, ZBTB14, EPB41L3, LOC645355, MIR3976, TMEM200C, L3MBTL4, MIR4317, LOC100130480, ARHGAP28, LINC00668, LAMA1, LRRC30, PTPRM, LOC100192426, …	SS18, MBD2, MALT1, DSG2, GATA6, PHLPP1, DCC, PTPN2, MAPK4, SMAD4, SLC39A6, BCL2, SETBP1, SMAD2, EPB41L3, RBBP8, SERPINB5, ZNF521	hsa-mir-4317, hsa-mir-3156-2, hsa-mir-320c-1, hsa-mir-133a-1, hsa-mir-1-2, hsa-mir-320c-2, hsa-mir-302f, hsa-mir-187, hsa-mir-4318, hsa-mir-924, hsa-mir-4319, hsa-mir-1539, U58C, U58A, U58B, mgU12-22/U4-8, U91, hsa-mir-4320, ACA37, hsa-mir-122		C-6HGFA	chr18:136226-78014123
UPN23	Gain	4	21	q22.3	q11.2	293	33090.9	33620	arr[hg19] 21q11.2q22.3(15,006,457-48,097,372)x4	POTED, C21orf15, ANKRD20A11P, LIPI, RBM11, ABCC13, HSPA13, SAMSN1, SAMSN1-AS1, LOC388813, NRIP1, USP25, LINC00478, MIR99A, MIRLET7C, MIR125B2, C21orf37, CXADR, BTG3, C21orf91-OT1, C21orf91, CHODL-AS1, CHODL, TMPRSS15, LINC00320, NCAM2, RNU6-67P, LINC00317, LINC00308, D21S2088E, LOC339622, LINC00158, MIR155HG, MIR155, LINC00515, MRPL39, JAM2, ATP5J, GABPA, APP, CYYR1, ADAMTS1, ADAMTS5, MIR4759, MI…	U2AF1, PTTG1IP, TIAM1, MIR125B2, OLIG2, CSTB, ADAMTS1, NRIP1, TFF3, TFF2, TMPRSS3, ERG, ETS2, DYRK1A, TFF1, TMPRSS2, RUNX1, S100B	hsa-mir-3118-5, hsa-mir-99a, hsa-let-7c, hsa-mir-125b-2, hsa-mir-548x, hsa-mir-155, hsa-mir-4327, ACA67, hsa-mir-802, hsa-mir-3197		C-3ELOA	chr21:15006457-48097372
[truncated: 507 more rows]
