# Supplementary material for: Unique mutation and gene expression in High Hyperdiploid Acute Lymphoblastic Leukaemia with whole chromosome uniparental isodisomy
Source: Research Square preprint supplement (doi:10.21203/rs.3.rs-1349722/v1), 2022-02-16
Supplement: Supplementary file 3 [file 5be39f85cd78b60d4fc7fa57.xlsx]

## Sheet: Final-Mutation
Supplementary table 4. Mutations detected on Targeted Panel sequencing with 4 (Rows 63-66) identified on RNA seq
UPN_ID	Mutation_Types	CHR	CHR State_p	CHR State_q	Gene CHR	Gene	Gene Ass Chr State	BLAST%	LOCATION_ST	#LOCATION_END	RNA-available	RNA validate	CpG Island	Acccepted	Changes	Transition/Transversion	REF-Al	ALT-AL	NM-ID	Exon_Pos	cDNA_Change	AA_Change	Genotype	Total_Depth	Ref_Depth	Variant_Depth	Variant_Freq(%)	snp	cosmic	esp	gerpgt2	clinvar	1000G	SIFT_score	SIFT_pred	Polyphen2_HDIV_score	Polyphen2_HDIV_pred	Polyphen2_HVAR_score	Polyphen2_HVAR_pred	LRT_score	LRT_pred	MutationTaster_score	MutationTaster_pred	MutationAssessor_score	MutationAssessor_pred	FATHMM_score	FATHMM_pred	PROVEAN_score	PROVEAN_pred
1	nonframeshift insertion	chr1	UPD	UPT	1p36.11	ARID1A	UPD	90	#27100181	27100181	Y	YES	No	YES	NA	NA	-	GCA	NM_006015,NM_139135	exon16,exon16	c.3977_3978insGCA,c.3977_3978insGCA	p.P1326delinsPQ,p.P1326delinsPQ	0/1	152	16	136	89.4737	rs570962335	ID=COSM1341408;OCCURENCE=1(large_intestine),1(pancreas)	0	0	237025,Mental_retardation\x2c_autosomal_dominant_14|not_provided,MedGen:C3553247\x2cOMIM:614607|MedGen:CN517202,criteria_provided\x2c_single_submitter,Likely_benign	0	.	.	.	.	.	.	.	.	.	.	.	.	.	.	.	.
1	nonsynonymous SNV	chr12	3	3	12q13.12	KMT2D	3	90	#49426753	49426753	Y	YES	No	YES	A>T	Transversion	A	T	NM_003482	exon39	c.T11735A	p.L3912H	0/1	196	155	41	20.9184	0	0	0	0	0	0	0	D	0.001	B	0.001	B	0.381	N	1	N	0	N	-2.77	D	0.39	N
1	stopgain	chr17	3	3	17p11.2	NCOR1	3	90	#16068343	16068343	Y	NO	No	YES	G>A	Transition	G	A	NM_006311,NM_001190440,NM_001190438	exon5,exon4,exon2	c.C568T,c.C568T,c.C241T	p.R190X,p.R190X,p.R81X	0/1	2169	1172	994	45.8276	rs78230791	ID=COSM4129609,COSM4590772;OCCURENCE=2(thyroid),23(upper_aerodigestive_tract)	0	0	0	0	.	.	.	.	.	.	0	D	1	A	.	.	.	.	.	.
3	nonsynonymous SNV	chr12	UPD	UPD	12q13.13	KMT2D	UPD	94	#49426729	49426729	N		No	YES	A>T	Transversion	A	T	NM_003482	exon39	c.T11759A	p.L3920Q	0/1	85	62	23	27.0588	0	ID=COSM6855598,COSM6855599;OCCURENCE=1(peritoneum)	0	0	0	0	0	D	0	B	0	B	0.711	N	1	N	0	N	-2.68	D	0.96	N
3	stopgain	chr17	3	3	17p11.4	NCOR1	3	94	#16068343	16068343	N		No	YES	G>A	Transition	G	A	NM_001190438,NM_001190440,NM_006311	exon2,exon4,exon5	c.C241T,c.C568T,c.C568T	p.R81X,p.R190X,p.R190X	0/1	2152	1088	1063	49.3959	rs78230791	ID=COSM4129609,COSM4590772;OCCURENCE=2(thyroid),23(upper_aerodigestive_tract)	0	0	0	0	.	.	.	.	.	.	0	D	1	A	.	.	.	.	.	.
3	frameshift deletion	chr1	2	3	1p12	NOTCH2	2	94	#120612003	120612004	N		Yes	YES	NA	NA	GG	-	NM_024408,NM_001200001	exon1,exon1	c.17_18del,c.17_18del	p.P6fs,p.P6fs	0/1	1103	843	260	23.5721	rs372504208	ID=COSM132830;OCCURENCE=3(breast),4(oesophagus),4(large_intestine),2(central_nervous_system),1(pleura),2(NS),1(haematopoietic_and_lymphoid_tissue),1(stomach),1(kidney),1(soft_tissue),3(urinary_tract),1(pancreas),1(skin),1(lung),3(thyroid),5(upper_aerodigestive_tract),1(testis)	0	0	215181,not_specified,MedGen:CN169374,criteria_provided\x2c_multiple_submitters\x2c_no_conflicts,Benign	0	.	.	.	.	.	.	.	.	.	.	.	.	.	.	.	.
5	nonsynonymous SNV	chr12	3	3	12q13.15	KMT2D	3	55	#49426729	49426729	N		No	YES	A>T	Transversion	A	T	NM_003482	exon39	c.T11759A	p.L3920Q	0/1	474	381	93	19.6203	0	ID=COSM6855598,COSM6855599;OCCURENCE=1(peritoneum)	0	0	0	0	0	D	0	B	0	B	0.711	N	1	N	0	N	-2.68	D	0.96	N
8	nonsynonymous SNV	chr1	2	2	1p35.1	CSMD2	2	92	#34101964	34101964	Y	YES	No	YES	G>C	Transversion	G	C	NM_001281956,NM_052896	exon30,exon30	c.C4965G,c.C4845G	p.C1655W,p.C1615W	0/1	540	437	103	19.0741	0	0	0	4.57	0	0	0.002	D	1	D	0.999	D	0	D	1	D	4.365	H	-6.74	D	-9.1	D
8	nonsynonymous SNV	chr17	2	2	17q13	ERBB2	2	92	#37880260	37880260	Y	YES	No	YES	A>C	Transversion	A	C	NM_001289936,NM_001005862,NM_004448,NM_001289937	exon23,exon22,exon19,exon19	c.A2259C,c.A2214C,c.A2304C,c.A2304C	p.L753F,p.L738F,p.L768F,p.L768F	0/1	298	226	72	24.1611	0	0	0	3	0	0	0.012	D	0.955	P	0.844	P	.	.	1	D	1.805	L	-1.8	D	-2.41	N
8	nonsynonymous SNV	chr9	3	3	9p24.1	JAK2	3	92	#5066779	5066779	Y	YES	No	YES	T>C	Transition	T	C	NM_001322195,NM_004972,NM_001322198,NM_001322204,NM_001322196,NM_001322199,NM_001322194	exon9,exon10,exon10,exon7,exon9,exon10,exon10	c.T1316C,c.T1316C,c.T101C,c.T869C,c.T1316C,c.T101C,c.T1316C	p.F439S,p.F439S,p.F34S,p.F290S,p.F439S,p.F34S,p.F439S	0/1	211	111	100	47.3934	0	0	0	5.51	0	0	0.004	D	0.973	D	0.838	P	0	D	1	D	1.95	M	0.48	T	-1.57	N
8	nonsynonymous SNV	chr17	2	2	17q11.2	NF1	2	92	#29657430	29657430	Y	YES	No	YES	T>G	Transversion	T	G	NM_001042492,NM_000267	exon39,exon38	c.T5726G,c.T5663G	p.V1909G,p.V1888G	0/1	185	138	47	25.4054	0	0	0	5.6	0	0	0.012	D	0.981	D	0.978	D	0	D	1	D	1.495	L	-4.11	D	-2.84	D
8	stopgain	chr3	2	2	3q26.32	TBL1XR1	2	92	#176767841	176767841	Y	NO	No	YES	G>A	Transition	G	A	NM_001321195,NM_024665,NM_001321193,NM_001321194	exon6,exon7,exon7,exon8	c.C385T,c.C646T,c.C646T,c.C646T	p.R129X,p.R216X,p.R216X,p.R216X	0/1	82	72	10	12.1951	0	ID=COSM1041416;OCCURENCE=1(endometrium)	0	4.3	0	0	.	.	.	.	.	.	0	D	1	A	.	.	.	.	.	.
9	nonsynonymous SNV	chr1	2	2	1p13.2	NRAS	2	91	#115258745	115258745	N		No	YES	C>G	Transversion	C	G	NM_002524	exon2	c.G37C	p.G13R	0/1	731	447	284	38.8509	rs121434595	ID=COSM569;OCCURENCE=1(salivary_gland),1(breast),1(genital_tract),18(large_intestine),2(central_nervous_system),5(biliary_tract),1(pleura),9(NS),4(stomach),79(haematopoietic_and_lymphoid_tissue),1(urinary_tract),3(soft_tissue),3(autonomic_ganglia),40(skin),2(thyroid),1(testis),1(eye),1(endometrium)	0	5.58	28938,Medulloblastoma|Acute_myeloid_leukemia|Congenital_giant_melanocytic_nevus|Transitional_cell_carcinoma_of_the_bladder|Multiple_myeloma|Cutaneous_melanoma|Non-Hodgkin_lymphoma|Neoplasm_of_the_large_intestine|Malignant_melanoma_of_skin|Myelodysplastic_syndrome|Adenocarcinoma_of_stomach|Carcinoma_of_colon,Human_Phenotype_Ontology:HP:0002885\x2cMeSH:D008527\x2cMedGen:C0025149\x2cOMIM:155255\x2cO…	0	0	D	0.999	D	0.982	D	0	U	1	D	2.36	M	-0.76	T	-6.71	D
10	nonsynonymous SNV	chr1	2	2	1p13.3	NRAS	2	91	#115256530	115256530	N		No	YES	G>T	Transversion	G	T	NM_002524	exon3	c.C181A	p.Q61K	0/1	487	363	124	25.462	rs121913254	ID=COSM580;OCCURENCE=3(breast),4(liver),1(peritoneum),2(cervix),3(meninges),115(large_intestine),9(central_nervous_system),6(biliary_tract),5(ovary),2(pleura),4(bone),78(NS),2(stomach),193(haematopoietic_and_lymphoid_tissue),1(kidney),5(urinary_tract),35(soft_tissue),3(pancreas),5(autonomic_ganglia),618(skin),1(prostate),30(lung),134(thyroid),3(upper_aerodigestive_tract),1(testis),2(thymus),6(eye…	0	5.08	83949,RAS_Inhibitor_response|Vascular_Tumors_Including_Pyogenic_Granuloma|Hepatocellular_carcinoma|Neuroblastoma|Acute_myeloid_leukemia|Chronic_lymphocytic_leukemia|Renal_cell_carcinoma\x2c_papillary\x2c_1|Congenital_giant_melanocytic_nevus|Transitional_cell_carcinoma_of_the_bladder|Adrenocortical_carcinoma|Multiple_myeloma|Cutaneous_melanoma|Lung_adenocarcinoma|Non-small_cell_lung_cancer|Neoplas…	0	0.009	D	0.948	P	0.76	P	0	U	1	D	3.73	H	-1.73	D	-3.38	D
10	nonsynonymous SNV	chr4	2	2	4p16.3	NSD2	2	91	#1962801	1962801	N		No	YES	G>A	Transition	G	A	NM_133330,NM_133335,NM_133331,NM_001042424	exon20,exon18,exon19,exon18	c.G3295A,c.G3295A,c.G3295A,c.G3295A	p.E1099K,p.E1099K,p.E1099K,p.E1099K	0/1	442	271	171	38.6878	rs772470710	ID=COSM379334,COSM3733309;OCCURENCE=5(large_intestine),1(biliary_tract),18(haematopoietic_and_lymphoid_tissue),2(kidney),2(lung)	0	5.51	0	0	0.005	D	1	D	0.96	D	0	D	1	D	1.23	L	-1.46	T	-3.29	D
11	frameshift deletion	chr20	2	2	20q11.21	ASXL1	2	89	#31022403	31022425	Y	YES	No	YES	NA	NA	CACCACTGCCATAGAGAGGCGGC	-	NM_015338	exon12	c.1888_1910del	p.H630fs	0/1	318	258	60	18.8679	rs766433101	ID=COSM51200,COSM3720455;OCCURENCE=43(haematopoietic_and_lymphoid_tissue),1(prostate),2(large_intestine)	0	0	0	0	.	.	.	.	.	.	.	.	.	.	.	.	.	.	.	.
11	nonsynonymous SNV	chr12	3	3	12p12.1	KRAS	3	89	#25398281	25398281	Y	YES	No	YES	C>T	Transition	C	T	NM_033360,NM_004985	exon2,exon2	c.G38A,c.G38A	p.G13D,p.G13D	0/1	202	140	62	30.6931	rs112445441	ID=COSM532,COSM1140132;OCCURENCE=1(salivary_gland),19(breast),16(peritoneum),5(liver),2(genital_tract),7(oesophagus),13(cervix),4565(large_intestine),1(central_nervous_system),33(biliary_tract),2(pleura),39(ovary),1(bone),7(NS),63(stomach),228(haematopoietic_and_lymphoid_tissue),12(urinary_tract),5(kidney),35(soft_tissue),71(pancreas),23(gastrointestinal_tract_(site_indeterminate)),10(skin),23(pr…	0	5.68	27619,Acute_myeloid_leukemia|Juvenile_myelomonocytic_leukemia|Non-small_cell_lung_cancer|Neoplasm_of_the_thyroid_gland|Neoplasm_of_the_large_intestine|Ovarian_Neoplasms|Breast_adenocarcinoma|RAS-associated_autoimmune_leukoproliferative_disorder,Human_Phenotype_Ontology:HP:0004808\x2cMeSH:D015470\x2cMedGen:C0023467\x2cOMIM:601626\x2cOrphanet:ORPHA519\x2cSNOMED_CT:17788007|Human_Phenotype_Ontology:…	0	0.032	D	0.803	P	0.506	P	0	D	1	D	3.375	M	-0.7	T	-5.4	D
12	stopgain	chr17	3	3	17p11.5	NCOR1	3	88	#16068343	16068343	Y	NO	No	YES	G>A	Transition	G	A	NM_001190438,NM_001190440,NM_006311	exon2,exon4,exon5	c.C241T,c.C568T,c.C568T	p.R81X,p.R190X,p.R190X	0/1	946	492	453	47.8858	rs78230791	ID=COSM4129609,COSM4590772;OCCURENCE=2(thyroid),23(upper_aerodigestive_tract)	0	0	0	0	.	.	.	.	.	.	0	D	1	A	.	.	.	.	.	.
12	nonsynonymous SNV	chr1	2	3	1p13.4	NRAS	2	88	#115256528	115256528	Y	YES	No	YES	T>G	Transversion	T	G	NM_002524	exon3	c.A183C	p.Q61H	0/1	254	206	48	18.8976	rs121913255	ID=COSM586;OCCURENCE=1(breast),2(liver),1(genital_tract),6(large_intestine),5(NS),42(haematopoietic_and_lymphoid_tissue),1(soft_tissue),23(skin),4(thyroid),2(eye)	0	3.93	362750,Acute_myeloid_leukemia|Cutaneous_melanoma|Non-small_cell_lung_cancer,Human_Phenotype_Ontology:HP:0004808\x2cMeSH:D015470\x2cMedGen:C0023467\x2cOMIM:601626\x2cOrphanet:ORPHA519\x2cSNOMED_CT:17788007|Human_Phenotype_Ontology:HP:0012056\x2cMeSH:D008545\x2cMedGen:C0025202|Human_Phenotype_Ontology:HP:0030358\x2cMeSH:D002289\x2cMedGen:C0007131\x2cSNOMED_CT:254637007,no_assertion_criteria_provide…	0	0.007	D	0.294	B	0.375	B	0	U	1	D	3.53	H	-1.81	D	-4.43	D
16	nonsynonymous SNV	chr12	2	2	12p12.2	KRAS	2	87	#25380271	25380271	N		No	YES	C>T	Transition	C	T	NM_004985,NM_033360	exon3,exon3	c.G187A,c.G187A	p.E63K,p.E63K	0/1	19	10	9	47.3684	0	ID=COSM1360847,COSM27159;OCCURENCE=2(haematopoietic_and_lymphoid_tissue),1(urinary_tract),2(pancreas),3(genital_tract),1(thyroid),2(large_intestine),1(central_nervous_system)	0	5.63	0	0	0.001	D	0.994	D	0.9	P	0	D	1	D	1.485	L	-1.1	T	-3.63	D
17	nonsynonymous SNV	chr1	2	2	1p13.4	NRAS	2	92	#115258744	115258744	Y	YES	No	Yes	C>T	Transition	C	T	NM_002524	exon2	c.G38A	p.G13D	0/2	57	47	10	17.5439	rs121434596	ID=COSM573;OCCURENCE=1(penis),7(NS),332(haematopoietic_and_lymphoid_tissue),1(soft_tissue),1(pancreas),32(skin),1(lung),1(thyroid),2(upper_aerodigestive_tract),17(large_intestine),1(central_nervous_system),1(endometrium)	0	5.58	28940,Medulloblastoma|Acute_myeloid_leukemia|Transitional_cell_carcinoma_of_the_bladder|Multiple_myeloma|Cutaneous_melanoma|Juvenile_myelomonocytic_leukemia|Non-Hodgkin_lymphoma|Neoplasm_of_the_large_intestine|Malignant_melanoma_of_skin|Myelodysplastic_syndrome|Adenocarcinoma_of_stomach|RAS-associated_autoimmune_leukoproliferative_disorder|Noonan_syndrome_6|not_provided,Human_Phenotype_Ontology:H…	0	0.029	D	0.434	B	0.383	B	0	U	1	D	3.325	M	-0.7	T	-5.48	D
19	nonsynonymous SNV	chr1	2	3	1p13.4	NRAS	2	89	#115258747	115258747	Y	YES	No	Yes	C>T	Transition	C	T	NM_002524	exon2	c.G35A	p.G12D	0/4	60	36	24	40	rs121913237	ID=COSM564;OCCURENCE=1(salivary_gland),1(penis),4(genital_tract),87(large_intestine),6(central_nervous_system),8(biliary_tract),4(ovary),12(NS),642(haematopoietic_and_lymphoid_tissue),1(kidney),2(soft_tissue),1(pancreas),74(skin),3(lung),4(thyroid),3(upper_aerodigestive_tract),4(testis),1(small_intestine),6(endometrium)	7.7e-05	5.58	48247,Acute_myeloid_leukemia|Multiple_myeloma|Epidermal_nevus|Cutaneous_melanoma|Juvenile_myelomonocytic_leukemia|Non-small_cell_lung_cancer|Neoplasm_of_the_large_intestine|Malignant_melanoma_of_skin|Myelodysplastic_syndrome|Malignant_neoplasm_of_body_of_uterus|Adenocarcinoma_of_stomach|not_provided,Human_Phenotype_Ontology:HP:0004808\x2cMeSH:D015470\x2cMedGen:C0023467\x2cOMIM:601626\x2cOrphanet:…	0	0.011	D	0.372	B	0.399	B	0	U	1	D	3.325	M	-1.19	T	-5.35	D
20	nonsynonymous SNV	chr9	3	3	9p24.2	JAK2	3	88	#5078360	5078360	N		No	YES	A>G	Transition	A	G	NM_001322194,NM_004972,NM_001322204,NM_001322198,NM_001322196,NM_001322195,NM_001322199	exon16,exon16,exon13,exon16,exon15,exon15,exon16	c.A2047G,c.A2047G,c.A1600G,c.A832G,c.A2047G,c.A2047G,c.A832G	p.R683G,p.R683G,p.R534G,p.R278G,p.R683G,p.R683G,p.R278G	0/1	161	115	46	28.5714	rs1057519721	ID=COSM29300;OCCURENCE=57(haematopoietic_and_lymphoid_tissue)	0	5.55	362830,Myeloproliferative_disorder|Lymphoblastic_leukemia\x2c_acute\x2c_with_lymphomatous_features,Human_Phenotype_Ontology:HP:0005547\x2cMeSH:D009196\x2cMedGen:C0027022\x2cSNOMED_CT:425333006|MedGen:C1855472\x2cOMIM:247640,no_assertion_criteria_provided,Pathogenic/Likely_pathogenic	0	0	D	1	D	1	D	0	D	1	D	1.855	L	-1.67	D	-5.88	D
23	stopgain	chr17	UPD	UPD	17q11.3	NF1	UPD	83	#29562641	29562641	N		No	YES	C>T	Transition	C	T	NM_001042492,NM_000267	exon28,exon28	c.C3721T,c.C3721T	p.R1241X,p.R1241X	0/1	274	127	147	53.6496	rs137854562	ID=COSM24441,COSM1710100;OCCURENCE=1(adrenal_gland),1(large_intestine),1(biliary_tract),1(haematopoietic_and_lymphoid_tissue),2(soft_tissue),1(pancreas),8(skin),1(endometrium)	0	4.8	15400,Inborn_genetic_diseases|Neurofibromatosis\x2c_type_1|not_provided,MeSH:D030342\x2cMedGen:C0950123|MedGen:C0027831\x2cOMIM:162200\x2cOrphanet:ORPHA636\x2cSNOMED_CT:92824003|MedGen:CN517202,criteria_provided\x2c_multiple_submitters\x2c_no_conflicts,Pathogenic	0	.	.	.	.	.	.	0	D	1	A	.	.	.	.	.	.
24	nonsynonymous SNV	chr12	2	2	12p12.9	KRAS	2	91	#25398284	25398284	N		No	YES	C>T	Transition	C	T	NM_033360,NM_004985	exon2,exon2	c.G35A,c.G35A	p.G12D,p.G12D	0/1	225	182	43	19.1111	rs121913529	ID=COSM1135366,COSM521;OCCURENCE=1(salivary_gland),1(pleura),334(ovary),1(bone),27(breast),2(penis),24(NS),114(stomach),244(haematopoietic_and_lymphoid_tissue),11(kidney),30(soft_tissue),41(urinary_tract),3183(pancreas),18(liver),95(peritoneum),3(genital_tract),18(oesophagus),20(gastrointestinal_tract_(site_indeterminate)),41(skin),22(prostate),1347(lung),40(thyroid),40(cervix),37(upper_aerodiges…	0	5.68	27621,Vascular_Tumors_Including_Pyogenic_Granuloma|Neoplasm_of_ovary|Cerebral_arteriovenous_malformation|Acute_myeloid_leukemia|Neoplasm_of_stomach|Nevus_sebaceous|Epidermal_nevus|Juvenile_myelomonocytic_leukemia|Non-small_cell_lung_cancer|Neoplasm_of_the_thyroid_gland|Neoplasm_of_the_large_intestine|Carcinoma_of_pancreas|Ovarian_Neoplasms|Epidermal_nevus_syndrome|Lung_cancer|RAS-associated_autoi…	0	0.024	D	0.517	P	0.361	B	0	D	1	D	3.245	M	-1.19	T	-5.27	D
26	nonsynonymous SNV	chr12	2	2	12p12.7	KRAS	2	88	#25398281	25398281	Y	YES	No	YES	C>T	Transition	C	T	NM_033360,NM_004985	exon2,exon2	c.G38A,c.G38A	p.G13D,p.G13D	0/1	170	89	81	47.6471	rs112445441	ID=COSM532,COSM1140132;OCCURENCE=1(salivary_gland),19(breast),16(peritoneum),5(liver),2(genital_tract),7(oesophagus),13(cervix),4565(large_intestine),1(central_nervous_system),33(biliary_tract),2(pleura),39(ovary),1(bone),7(NS),63(stomach),228(haematopoietic_and_lymphoid_tissue),12(urinary_tract),5(kidney),35(soft_tissue),71(pancreas),23(gastrointestinal_tract_(site_indeterminate)),10(skin),23(pr…	0	5.68	27619,Acute_myeloid_leukemia|Juvenile_myelomonocytic_leukemia|Non-small_cell_lung_cancer|Neoplasm_of_the_thyroid_gland|Neoplasm_of_the_large_intestine|Ovarian_Neoplasms|Breast_adenocarcinoma|RAS-associated_autoimmune_leukoproliferative_disorder,Human_Phenotype_Ontology:HP:0004808\x2cMeSH:D015470\x2cMedGen:C0023467\x2cOMIM:601626\x2cOrphanet:ORPHA519\x2cSNOMED_CT:17788007|Human_Phenotype_Ontology:…	0	0.032	D	0.803	P	0.506	P	0	D	1	D	3.375	M	-0.7	T	-5.4	D
28	nonsynonymous SNV	chr16	3	3	16p13.3	CREBBP	3	91	#3900386	3900386	Y	YES	No	YES	C>G	Transversion	C	G	NM_001079846,NM_004380	exon2,exon2	c.G710C,c.G710C	p.S237T,p.S237T	0|1	131	87	44	33.5878	0	0	0	6.01	0	0	0.009	D	0.997	D	0.971	D	0	D	1	D	1.65	L	-1.71	D	-1.64	N
29	nonsynonymous SNV	chr12	2	2	12q13.18	KMT2D	2	88	#49435116	49435116	N		No	YES	G>A	Transition	G	A	NM_003482	exon31	c.C6437T	p.P2146L	0/1	170	97	73	42.9412	rs563981206	ID=COSM3461579,COSM3461578;OCCURENCE=1(haematopoietic_and_lymphoid_tissue),1(skin)	0	3.83	325165,Kabuki_syndrome|Kabuki_syndrome_1,MedGen:C0796004\x2cOrphanet:ORPHA2322\x2cSNOMED_CT:313426007|MedGen:CN030661\x2cOMIM:147920,criteria_provided\x2c_multiple_submitters\x2c_no_conflicts,Likely_benign	0.0399361	0.001	D	0.981	D	0.449	P	0.006	N	1	D	0	N	-1.71	D	-2.15	N
29	nonsynonymous SNV	chr12	2	2	12q13.17	KMT2D	2	88	#49426753	49426753	N		No	YES	A>T	Transversion	A	T	NM_003482	exon39	c.T11735A	p.L3912H	0/1	53	41	12	22.6415	0	0	0	0	0	0	0	D	0.001	B	0.001	B	0.381	N	1	N	0	N	-2.77	D	0.39	N
29	nonsynonymous SNV	chr12	2	2	12p12.3	KRAS	2	88	#25378647	25378647	N		No	YES	T>G	Transversion	T	G	NM_004985,NM_033360	exon4,exon4	c.A351C,c.A351C	p.K117N,p.K117N	0/1	76	43	33	43.4211	rs770248150	ID=COSM19940,COSM1256061;OCCURENCE=1(oesophagus),9(large_intestine),8(haematopoietic_and_lymphoid_tissue),1(skin),1(small_intestine)	0	0	362844,Hepatocellular_carcinoma|Multiple_myeloma|Carcinoma_of_esophagus|Neoplasm_of_the_large_intestine|Malignant_melanoma_of_skin|Adenocarcinoma_of_stomach,Human_Phenotype_Ontology:HP:0001402\x2cMedGen:C2239176\x2cOMIM:114550\x2cOrphanet:ORPHA88673\x2cSNOMED_CT:187769009\x2cSNOMED_CT:25370001|Human_Phenotype_Ontology:HP:0006775\x2cMeSH:D009101\x2cMedGen:C0026764\x2cOMIM:254500\x2cOrphanet:ORPHA2…	0	0.012	D	1	D	0.998	D	0	D	1	D	5	H	-2.31	D	-4.56	D
30	nonsynonymous SNV	chr12	2	2	12p12.4	KRAS	2	78	#25378562	25378562	N		No	YES	C>T	Transition	C	T	NM_004985,NM_033360	exon4,exon4	c.G436A,c.G436A	p.A146T,p.A146T	0/1	128	109	19	14.8438	rs121913527	ID=COSM19404,COSM1165198;OCCURENCE=1(peritoneum),1(genital_tract),167(large_intestine),4(biliary_tract),1(NS),37(haematopoietic_and_lymphoid_tissue),5(stomach),3(urinary_tract),3(pancreas),1(skin),2(lung),1(upper_aerodigestive_tract),2(small_intestine),2(endometrium)	0	5.52	194404,Neoplasm_of_the_large_intestine|not_provided,Human_Phenotype_Ontology:HP:0100834\x2cMeSH:D015179\x2cMedGen:C0009404\x2cSNOMED_CT:126837005|MedGen:CN517202,criteria_provided\x2c_single_submitter,Uncertain_significance	0	0.009	D	1	D	0.987	D	0	D	1	D	3.945	H	-2.42	D	-3.63	D
30	nonsynonymous SNV	chr1	2	3	1p13.5	NRAS	2	78	#115258747	115258747	N		No	YES	C>T	Transition	C	T	NM_002524	exon2	c.G35A	p.G12D	0/1	292	245	47	16.0959	rs121913237	ID=COSM564;OCCURENCE=1(salivary_gland),1(penis),4(genital_tract),87(large_intestine),6(central_nervous_system),8(biliary_tract),4(ovary),12(NS),642(haematopoietic_and_lymphoid_tissue),1(kidney),2(soft_tissue),1(pancreas),74(skin),3(lung),4(thyroid),3(upper_aerodigestive_tract),4(testis),1(small_intestine),6(endometrium)	7.7e-05	5.58	48247,Acute_myeloid_leukemia|Multiple_myeloma|Epidermal_nevus|Cutaneous_melanoma|Juvenile_myelomonocytic_leukemia|Non-small_cell_lung_cancer|Neoplasm_of_the_large_intestine|Malignant_melanoma_of_skin|Myelodysplastic_syndrome|Malignant_neoplasm_of_body_of_uterus|Adenocarcinoma_of_stomach|not_provided,Human_Phenotype_Ontology:HP:0004808\x2cMeSH:D015470\x2cMedGen:C0023467\x2cOMIM:601626\x2cOrphanet:…	0	0.011	D	0.372	B	0.399	B	0	U	1	D	3.325	M	-1.19	T	-5.35	D
31	nonsynonymous SNV	chr12	2	2	12p12.8	KRAS	2	90	#25398284	25398284	N		No	YES	C>G	Transversion	C	G	NM_004985,NM_033360	exon2,exon2	c.G35C,c.G35C	p.G12A,p.G12A	0/1	147	112	35	23.8095	rs121913529	ID=COSM522,COSM1140134;OCCURENCE=46(ovary),1(bone),5(breast),4(NS),57(haematopoietic_and_lymphoid_tissue),27(stomach),10(urinary_tract),5(soft_tissue),87(pancreas),1(liver),1(peritoneum),2(oesophagus),2(genital_tract),4(gastrointestinal_tract_(site_indeterminate)),2(skin),2(prostate),548(lung),7(thyroid),5(cervix),3(upper_aerodigestive_tract),2(testis),2(thymus),1436(large_intestine),6(central_ne…	0	5.68	54289,Lung_adenocarcinoma|Non-small_cell_lung_cancer|Gastrointestinal_stroma_tumor|Neoplasm_of_the_large_intestine|Ovarian_Neoplasms,Human_Phenotype_Ontology:HP:0030078\x2cMeSH:C538231\x2cMedGen:C0152013|Human_Phenotype_Ontology:HP:0030358\x2cMeSH:D002289\x2cMedGen:C0007131\x2cSNOMED_CT:254637007|Human_Phenotype_Ontology:HP:0100723\x2cMeSH:D046152\x2cMedGen:C0238198\x2cOMIM:606764\x2cOrphanet:ORP…	0	0.03	D	0.956	P	0.773	P	0	D	1	D	2.27	M	-1.14	T	-4.55	D
32	nonsynonymous SNV	chr12	2	2	12p12.10	KRAS	2	82	#25398281	25398281	Y	YES	No	YES	C>T	Transition	C	T	NM_033360,NM_004985	exon2,exon2	c.G38A,c.G38A	p.G13D,p.G13D	0/1	193	89	104	53.886	rs112445441	ID=COSM532,COSM1140132;OCCURENCE=1(salivary_gland),19(breast),16(peritoneum),5(liver),2(genital_tract),7(oesophagus),13(cervix),4565(large_intestine),1(central_nervous_system),33(biliary_tract),2(pleura),39(ovary),1(bone),7(NS),63(stomach),228(haematopoietic_and_lymphoid_tissue),12(urinary_tract),5(kidney),35(soft_tissue),71(pancreas),23(gastrointestinal_tract_(site_indeterminate)),10(skin),23(pr…	0	5.68	27619,Acute_myeloid_leukemia|Juvenile_myelomonocytic_leukemia|Non-small_cell_lung_cancer|Neoplasm_of_the_thyroid_gland|Neoplasm_of_the_large_intestine|Ovarian_Neoplasms|Breast_adenocarcinoma|RAS-associated_autoimmune_leukoproliferative_disorder,Human_Phenotype_Ontology:HP:0004808\x2cMeSH:D015470\x2cMedGen:C0023467\x2cOMIM:601626\x2cOrphanet:ORPHA519\x2cSNOMED_CT:17788007|Human_Phenotype_Ontology:…	0	0.032	D	0.803	P	0.506	P	0	D	1	D	3.375	M	-0.7	T	-5.4	D
34	nonsynonymous SNV	chr1	2	2	1q25.3	HMCN1	2	93	#186143739	186143739	N		No	YES	G>T	Transversion	G	T	NM_031935	exon103	c.G15908T	p.G5303V	0/1	444	306	138	31.0811	0	0	0	5.45	0	0	0.003	D	1	D	0.999	D	0	D	1	D	4.145	H	-3.1	D	-7.05	D
34	nonsynonymous SNV	chr12	2	2	12p12.5	KRAS	2	93	#25398281	25398281	N		No	YES	C>T	Transition	C	T	NM_033360,NM_004985	exon2,exon2	c.G38A,c.G38A	p.G13D,p.G13D	0/1	221	147	74	33.4842	rs112445441	ID=COSM532,COSM1140132;OCCURENCE=1(salivary_gland),19(breast),16(peritoneum),5(liver),2(genital_tract),7(oesophagus),13(cervix),4565(large_intestine),1(central_nervous_system),33(biliary_tract),2(pleura),39(ovary),1(bone),7(NS),63(stomach),228(haematopoietic_and_lymphoid_tissue),12(urinary_tract),5(kidney),35(soft_tissue),71(pancreas),23(gastrointestinal_tract_(site_indeterminate)),10(skin),23(pr…	0	5.68	27619,Acute_myeloid_leukemia|Juvenile_myelomonocytic_leukemia|Non-small_cell_lung_cancer|Neoplasm_of_the_thyroid_gland|Neoplasm_of_the_large_intestine|Ovarian_Neoplasms|Breast_adenocarcinoma|RAS-associated_autoimmune_leukoproliferative_disorder,Human_Phenotype_Ontology:HP:0004808\x2cMeSH:D015470\x2cMedGen:C0023467\x2cOMIM:601626\x2cOrphanet:ORPHA519\x2cSNOMED_CT:17788007|Human_Phenotype_Ontology:…	0	0.032	D	0.803	P	0.506	P	0	D	1	D	3.375	M	-0.7	T	-5.4	D
35	nonsynonymous SNV	chr12	2	2	12p12.13	KRAS	2	90	#25398281	25398281	N		No	YES	C>T	Transition	C	T	NM_033360,NM_004985	exon2,exon2	c.G38A,c.G38A	p.G13D,p.G13D	0/1	211	103	108	51.1848	rs112445441	ID=COSM532,COSM1140132;OCCURENCE=1(salivary_gland),19(breast),16(peritoneum),5(liver),2(genital_tract),7(oesophagus),13(cervix),4565(large_intestine),1(central_nervous_system),33(biliary_tract),2(pleura),39(ovary),1(bone),7(NS),63(stomach),228(haematopoietic_and_lymphoid_tissue),12(urinary_tract),5(kidney),35(soft_tissue),71(pancreas),23(gastrointestinal_tract_(site_indeterminate)),10(skin),23(pr…	0	5.68	27619,Acute_myeloid_leukemia|Juvenile_myelomonocytic_leukemia|Non-small_cell_lung_cancer|Neoplasm_of_the_thyroid_gland|Neoplasm_of_the_large_intestine|Ovarian_Neoplasms|Breast_adenocarcinoma|RAS-associated_autoimmune_leukoproliferative_disorder,Human_Phenotype_Ontology:HP:0004808\x2cMeSH:D015470\x2cMedGen:C0023467\x2cOMIM:601626\x2cOrphanet:ORPHA519\x2cSNOMED_CT:17788007|Human_Phenotype_Ontology:…	0	0.032	D	0.803	P	0.506	P	0	D	1	D	3.375	M	-0.7	T	-5.4	D
35	nonsynonymous SNV	chr4	2	2	4p16.4	NSD2	2	90	#1962801	1962801	N		No	YES	G>A	Transition	G	A	NM_133331,NM_133330,NM_001042424,NM_133335	exon19,exon20,exon18,exon18	c.G3295A,c.G3295A,c.G3295A,c.G3295A	p.E1099K,p.E1099K,p.E1099K,p.E1099K	0/1	466	307	159	34.1202	rs772470710	ID=COSM379334,COSM3733309;OCCURENCE=5(large_intestine),1(biliary_tract),18(haematopoietic_and_lymphoid_tissue),2(kidney),2(lung)	0	5.51	0	0	0.005	D	1	D	0.96	D	0	D	1	D	1.23	L	-1.46	T	-3.29	D
36	frameshift insertion	chr12	2	2	12p13.3	ETV6	2	81	#11905432	11905432	Y	YES	No	YES	NA	NA	-	C	NM_001987	exon2	c.83dupC	p.A28fs	0|1	90	52	38	42.2222	0	0	0	0	0	0	0.05	D	0.013	B	0.008	B	0	N	0.744	N	0.345	N	1.52	T	0.23	N
36	nonsynonymous SNV	chr1	2	3	1p13.6	NRAS	2	81	#115258744	115258744	Y	YES	No	YES	C>T	Transition	C	T	NM_002524	exon2	c.G38A	p.G13D	0/1	305	211	94	30.8197	rs121434596	ID=COSM573;OCCURENCE=1(penis),7(NS),332(haematopoietic_and_lymphoid_tissue),1(soft_tissue),1(pancreas),32(skin),1(lung),1(thyroid),2(upper_aerodigestive_tract),17(large_intestine),1(central_nervous_system),1(endometrium)	0	5.58	28940,Medulloblastoma|Acute_myeloid_leukemia|Transitional_cell_carcinoma_of_the_bladder|Multiple_myeloma|Cutaneous_melanoma|Juvenile_myelomonocytic_leukemia|Non-Hodgkin_lymphoma|Neoplasm_of_the_large_intestine|Malignant_melanoma_of_skin|Myelodysplastic_syndrome|Adenocarcinoma_of_stomach|RAS-associated_autoimmune_leukoproliferative_disorder|Noonan_syndrome_6|not_provided,Human_Phenotype_Ontology:H…	0	0.029	D	0.434	B	0.383	B	0	U	1	D	3.325	M	-0.7	T	-5.48	D
39	nonsynonymous SNV	chr12	2	2	12p12.6	KRAS	2	75	#25398284	25398284	N		No	YES	C>T	Transition	C	T	NM_033360,NM_004985	exon2,exon2	c.G35A,c.G35A	p.G12D,p.G12D	0/1	192	121	71	36.9792	rs121913529	ID=COSM1135366,COSM521;OCCURENCE=1(salivary_gland),1(pleura),334(ovary),1(bone),27(breast),2(penis),24(NS),114(stomach),244(haematopoietic_and_lymphoid_tissue),11(kidney),30(soft_tissue),41(urinary_tract),3183(pancreas),18(liver),95(peritoneum),3(genital_tract),18(oesophagus),20(gastrointestinal_tract_(site_indeterminate)),41(skin),22(prostate),1347(lung),40(thyroid),40(cervix),37(upper_aerodiges…	0	5.68	27621,Vascular_Tumors_Including_Pyogenic_Granuloma|Neoplasm_of_ovary|Cerebral_arteriovenous_malformation|Acute_myeloid_leukemia|Neoplasm_of_stomach|Nevus_sebaceous|Epidermal_nevus|Juvenile_myelomonocytic_leukemia|Non-small_cell_lung_cancer|Neoplasm_of_the_thyroid_gland|Neoplasm_of_the_large_intestine|Carcinoma_of_pancreas|Ovarian_Neoplasms|Epidermal_nevus_syndrome|Lung_cancer|RAS-associated_autoi…	0	0.024	D	0.517	P	0.361	B	0	D	1	D	3.245	M	-1.19	T	-5.27	D
40	nonsynonymous SNV	chr16	3	3	16p13.4	CREBBP	3	96	#3786750	3786750	N		No	YES	G>T	Transversion	G	T	NM_001079846,NM_004380	exon26,exon27	c.C4347A,c.C4461A	p.H1449Q,p.H1487Q	0/1	611	502	109	17.8396	0	0	0	5.25	0	0	0.001	D	0.999	D	0.995	D	0	D	1	D	3.775	H	-2.76	D	-7.84	D
41	nonsynonymous SNV	chr12	2	2	12p12.11	KRAS	2	93	#25398281	25398281	N		No	YES	C>T	Transition	C	T	NM_033360,NM_004985	exon2,exon2	c.G38A,c.G38A	p.G13D,p.G13D	0/1	171	149	22	12.8655	rs112445441	ID=COSM532,COSM1140132;OCCURENCE=1(salivary_gland),19(breast),16(peritoneum),5(liver),2(genital_tract),7(oesophagus),13(cervix),4565(large_intestine),1(central_nervous_system),33(biliary_tract),2(pleura),39(ovary),1(bone),7(NS),63(stomach),228(haematopoietic_and_lymphoid_tissue),12(urinary_tract),5(kidney),35(soft_tissue),71(pancreas),23(gastrointestinal_tract_(site_indeterminate)),10(skin),23(pr…	0	5.68	27619,Acute_myeloid_leukemia|Juvenile_myelomonocytic_leukemia|Non-small_cell_lung_cancer|Neoplasm_of_the_thyroid_gland|Neoplasm_of_the_large_intestine|Ovarian_Neoplasms|Breast_adenocarcinoma|RAS-associated_autoimmune_leukoproliferative_disorder,Human_Phenotype_Ontology:HP:0004808\x2cMeSH:D015470\x2cMedGen:C0023467\x2cOMIM:601626\x2cOrphanet:ORPHA519\x2cSNOMED_CT:17788007|Human_Phenotype_Ontology:…	0	0.032	D	0.803	P	0.506	P	0	D	1	D	3.375	M	-0.7	T	-5.4	D
43	nonsynonymous SNV	chr1	2	3	1p13.4	NRAS	2	88	#115258744	115258744	Y	YES	No	Yes	C>T	Transition	C	T	NM_002524	exon2	c.G38A	p.G13D	0/3	151	110	41	27.1523	rs121434596	ID=COSM573;OCCURENCE=1(penis),7(NS),332(haematopoietic_and_lymphoid_tissue),1(soft_tissue),1(pancreas),32(skin),1(lung),1(thyroid),2(upper_aerodigestive_tract),17(large_intestine),1(central_nervous_system),1(endometrium)	0	5.58	28940,Medulloblastoma|Acute_myeloid_leukemia|Transitional_cell_carcinoma_of_the_bladder|Multiple_myeloma|Cutaneous_melanoma|Juvenile_myelomonocytic_leukemia|Non-Hodgkin_lymphoma|Neoplasm_of_the_large_intestine|Malignant_melanoma_of_skin|Myelodysplastic_syndrome|Adenocarcinoma_of_stomach|RAS-associated_autoimmune_leukoproliferative_disorder|Noonan_syndrome_6|not_provided,Human_Phenotype_Ontology:H…	0	0.029	D	0.434	B	0.383	B	0	U	1	D	3.325	M	-0.7	T	-5.48	D
44	nonframeshift deletion	chr16	2	2	16p13.7	CREBBP	2	54	#3781324	3781326	N		Yes	YES	NA	NA	AGG	-	NM_004380,NM_001079846	exon30,exon29	c.5039_5041del,c.4925_4927del	p.1680_1681del,p.1642_1643del	0/1	416	219	197	47.3558	rs587783502	ID=COSM291735;OCCURENCE=1(penis),2(oesophagus),2(large_intestine),1(central_nervous_system),20(haematopoietic_and_lymphoid_tissue),2(urinary_tract),1(skin),1(lung),1(endometrium)	0	0	169219,Rubinstein-Taybi_syndrome_1,MedGen:C4551859\x2cOMIM:180849\x2cOrphanet:ORPHA353277,criteria_provided\x2c_single_submitter,Likely_pathogenic	0	.	.	.	.	.	.	.	.	.	.	.	.	.	.	.	.
45	nonsynonymous SNV	chr17	3	3	17q15	ERBB2	3	60	#37883102	37883102	N		No	YES	G>T	Transversion	G	T	NM_001289937,NM_001005862,NM_001289936,NM_004448	exon25,exon28,exon29,exon25	c.G3005T,c.G2915T,c.G2960T,c.G3005T	p.S1002I,p.S972I,p.S987I,p.S1002I	0/1	175	77	98	56	0	0	0	5.63	0	0	0.001	D	1	D	0.98	D	.	.	1	D	2.595	M	-1.06	T	-3.89	D
45	nonsynonymous SNV	chr1	2	3	1p13.8	NRAS	2	60	#115258748	115258748	N		No	YES	C>T	Transition	C	T	NM_002524	exon2	c.G34A	p.G12S	0/1	307	180	127	41.3681	rs121913250	ID=COSM563;OCCURENCE=1(genital_tract),1(meninges),13(large_intestine),2(central_nervous_system),1(ovary),5(NS),1(stomach),190(haematopoietic_and_lymphoid_tissue),2(soft_tissue),15(skin),6(prostate),6(lung),5(thyroid),22(upper_aerodigestive_tract)	0	5.58	172332,Acute_myeloid_leukemia|Multiple_myeloma|Cutaneous_melanoma|Non-small_cell_lung_cancer|Neoplasm_of_the_large_intestine|Malignant_melanoma_of_skin|Myelodysplastic_syndrome|Malignant_neoplasm_of_body_of_uterus|Adenocarcinoma_of_stomach|Rasopathy|not_provided,Human_Phenotype_Ontology:HP:0004808\x2cMeSH:D015470\x2cMedGen:C0023467\x2cOMIM:601626\x2cOrphanet:ORPHA519\x2cSNOMED_CT:17788007|Human_P…	0	0.029	D	0.329	B	0.431	B	0	U	1	D	1.115	L	-1.01	T	-4.44	D
46	nonsynonymous SNV	chr1	2	3	1p13.7	NRAS	2	85	#115258747	115258747	N		No	YES	C>T	Transition	C	T	NM_002524	exon2	c.G35A	p.G12D	0/1	318	161	157	49.3711	rs121913237	ID=COSM564;OCCURENCE=1(salivary_gland),1(penis),4(genital_tract),87(large_intestine),6(central_nervous_system),8(biliary_tract),4(ovary),12(NS),642(haematopoietic_and_lymphoid_tissue),1(kidney),2(soft_tissue),1(pancreas),74(skin),3(lung),4(thyroid),3(upper_aerodigestive_tract),4(testis),1(small_intestine),6(endometrium)	7.7e-05	5.58	48247,Acute_myeloid_leukemia|Multiple_myeloma|Epidermal_nevus|Cutaneous_melanoma|Juvenile_myelomonocytic_leukemia|Non-small_cell_lung_cancer|Neoplasm_of_the_large_intestine|Malignant_melanoma_of_skin|Myelodysplastic_syndrome|Malignant_neoplasm_of_body_of_uterus|Adenocarcinoma_of_stomach|not_provided,Human_Phenotype_Ontology:HP:0004808\x2cMeSH:D015470\x2cMedGen:C0023467\x2cOMIM:601626\x2cOrphanet:…	0	0.011	D	0.372	B	0.399	B	0	U	1	D	3.325	M	-1.19	T	-5.35	D
47	nonsynonymous SNV	chr12	2	2	12p12.15	KRAS	2	87	#25378562	25378562	N		No	YES	C>T	Transition	C	T	NM_004985,NM_033360	exon4,exon4	c.G436A,c.G436A	p.A146T,p.A146T	0/1	159	118	41	25.7862	rs121913527	ID=COSM19404,COSM1165198;OCCURENCE=1(peritoneum),1(genital_tract),167(large_intestine),4(biliary_tract),1(NS),37(haematopoietic_and_lymphoid_tissue),5(stomach),3(urinary_tract),3(pancreas),1(skin),2(lung),1(upper_aerodigestive_tract),2(small_intestine),2(endometrium)	0	5.52	194404,Neoplasm_of_the_large_intestine|not_provided,Human_Phenotype_Ontology:HP:0100834\x2cMeSH:D015179\x2cMedGen:C0009404\x2cSNOMED_CT:126837005|MedGen:CN517202,criteria_provided\x2c_single_submitter,Uncertain_significance	0	0.009	D	1	D	0.987	D	0	D	1	D	3.945	H	-2.42	D	-3.63	D
48	nonsynonymous SNV	chr12	3	3	12p12.16	KRAS	3	86	#25398284	25398284	N		No	YES	C>A	Transversion	C	A	NM_004985,NM_033360	exon2,exon2	c.G35T,c.G35T	p.G12V,p.G12V	0/1	198	169	29	14.6465	rs121913529	ID=COSM1140133,COSM520;OCCURENCE=18(breast),1(female_genital_tract_(site_indeterminate)),7(liver),36(peritoneum),7(oesophagus),9(genital_tract),23(cervix),5488(large_intestine),1(central_nervous_system),155(biliary_tract),1(vulva),2(pleura),327(ovary),20(NS),39(stomach),89(haematopoietic_and_lymphoid_tissue),6(kidney),8(soft_tissue),32(urinary_tract),2099(pancreas),1(autonomic_ganglia),11(gastroi…	0	5.68	27622,Cerebral_arteriovenous_malformation|Acute_myeloid_leukemia|Nevus_sebaceous|Juvenile_myelomonocytic_leukemia|Non-small_cell_lung_cancer|Neoplasm_of_the_thyroid_gland|Neoplasm_of_the_large_intestine|Carcinoma_of_pancreas|Ovarian_Neoplasms|not_provided,Human_Phenotype_Ontology:HP:0002408\x2cMedGen:C0917804\x2cOMIM:108010\x2cSNOMED_CT:234142008|Human_Phenotype_Ontology:HP:0004808\x2cMeSH:D01547…	0	0.01	D	0.999	D	0.978	D	0	D	1	D	3.135	M	-1.2	T	-6.95	D
49	nonsynonymous SNV	chr12	2	2	12p12.14	KRAS	2	72	#25398284	25398284	N		No	YES	C>T	Transition	C	T	NM_004985,NM_033360	exon2,exon2	c.G35A,c.G35A	p.G12D,p.G12D	0/1	200	121	79	39.5	rs121913529	ID=COSM1135366,COSM521;OCCURENCE=1(salivary_gland),1(pleura),334(ovary),1(bone),27(breast),2(penis),24(NS),114(stomach),244(haematopoietic_and_lymphoid_tissue),11(kidney),30(soft_tissue),41(urinary_tract),3183(pancreas),18(liver),95(peritoneum),3(genital_tract),18(oesophagus),20(gastrointestinal_tract_(site_indeterminate)),41(skin),22(prostate),1347(lung),40(thyroid),40(cervix),37(upper_aerodiges…	0	5.68	27621,Vascular_Tumors_Including_Pyogenic_Granuloma|Neoplasm_of_ovary|Cerebral_arteriovenous_malformation|Acute_myeloid_leukemia|Neoplasm_of_stomach|Nevus_sebaceous|Epidermal_nevus|Juvenile_myelomonocytic_leukemia|Non-small_cell_lung_cancer|Neoplasm_of_the_thyroid_gland|Neoplasm_of_the_large_intestine|Carcinoma_of_pancreas|Ovarian_Neoplasms|Epidermal_nevus_syndrome|Lung_cancer|RAS-associated_autoi…	0	0.024	D	0.517	P	0.361	B	0	D	1	D	3.245	M	-1.19	T	-5.27	D
51	nonsynonymous SNV	chr12	2	2	12p13.31	CHD4	2	88	#6697480	6697480	Y	YES	No	YES	G>A	Transition	G	A	NM_001273,NM_001297553	exon23,exon22	c.C3449T,c.C3428T	p.P1150L,p.P1143L	0/1	383	290	93	24.282	0	0	0	5.91	0	0	0	D	1	D	0.998	D	0	D	1	D	4.115	H	-4	D	-8.65	D
51	stopgain	chr16	2	2	16p13.5	CREBBP	2	88	#3779564	3779564	Y	YES	No	YES	G>T	Transversion	G	T	NM_001079846,NM_004380	exon30,exon31	c.C5370A,c.C5484A	p.Y1790X,p.Y1828X	0/1	471	286	185	39.2781	0	ID=COSM6944183;OCCURENCE=1(thyroid)	0	3.38	0	0	.	.	.	.	.	.	0	D	1	D	.	.	.	.	.	.
51	nonframeshift substitution	chr12	2	2	12q13.23	KMT2D	2	88	#49440493	49440494	Y	YES	No	YES	NA	NA	GG	CC	NM_003482	exon15	c.4316_4317GG,	p.G887R	0/1	363	291	72	19.8347	0	0	0	0	0	0	.	.	.	.	.	.	.	.	.	.	.	.	.	.	.	.
51	nonsynonymous SNV	chr12	2	2	12p12.12	KRAS	2	88	#25398281	25398281	Y	YES	No	YES	C>T	Transition	C	T	NM_004985,NM_033360	exon2,exon2	c.G38A,c.G38A	p.G13D,p.G13D	0/1	203	177	26	12.8079	rs112445441	ID=COSM532,COSM1140132;OCCURENCE=1(salivary_gland),19(breast),16(peritoneum),5(liver),2(genital_tract),7(oesophagus),13(cervix),4565(large_intestine),1(central_nervous_system),33(biliary_tract),2(pleura),39(ovary),1(bone),7(NS),63(stomach),228(haematopoietic_and_lymphoid_tissue),12(urinary_tract),5(kidney),35(soft_tissue),71(pancreas),23(gastrointestinal_tract_(site_indeterminate)),10(skin),23(pr…	0	5.68	27619,Acute_myeloid_leukemia|Juvenile_myelomonocytic_leukemia|Non-small_cell_lung_cancer|Neoplasm_of_the_thyroid_gland|Neoplasm_of_the_large_intestine|Ovarian_Neoplasms|Breast_adenocarcinoma|RAS-associated_autoimmune_leukoproliferative_disorder,Human_Phenotype_Ontology:HP:0004808\x2cMeSH:D015470\x2cMedGen:C0023467\x2cOMIM:601626\x2cOrphanet:ORPHA519\x2cSNOMED_CT:17788007|Human_Phenotype_Ontology:…	0	0.032	D	0.803	P	0.506	P	0	D	1	D	3.375	M	-0.7	T	-5.4	D
52	nonsynonymous SNV	chr21	4		21q22.15	RUNX1	4	79	#36164610	36164610	Y	YES	Yes	YES	T>G	Transversion	T	G	NM_001001890,NM_001754	exon6,exon9	c.A1184C,c.A1265C	p.E395A,p.E422A	0/1	65	31	34	52.3077	0	0	0	4.97	0	0	0.003	D	0.245	B	0.079	B	0.004	N	0.991	D	1.385	L	1.37	T	-3.43	D
53	nonsynonymous SNV	chr12	2	2	12p12.2	KRAS	2	80	#25398284	25398284	Y	YES	No	Yes	C>G	Transversion	C	G	NM_004985,NM_033360	exon2,exon2	c.G35A,c.G35A	p.G12D,p.G12D	0/1	63	43	20	31.746	rs121913529	ID=COSM1135366,COSM521;OCCURENCE=1(salivary_gland),1(pleura),334(ovary),1(bone),27(breast),2(penis),24(NS),114(stomach),244(haematopoietic_and_lymphoid_tissue),11(kidney),30(soft_tissue),41(urinary_tract),3183(pancreas),18(liver),95(peritoneum),3(genital_tract),18(oesophagus),20(gastrointestinal_tract_(site_indeterminate)),41(skin),22(prostate),1347(lung),40(thyroid),40(cervix),37(upper_aerodiges…	0	5.68	27621,Vascular_Tumors_Including_Pyogenic_Granuloma|Neoplasm_of_ovary|Cerebral_arteriovenous_malformation|Acute_myeloid_leukemia|Neoplasm_of_stomach|Nevus_sebaceous|Epidermal_nevus|Juvenile_myelomonocytic_leukemia|Non-small_cell_lung_cancer|Neoplasm_of_the_thyroid_gland|Neoplasm_of_the_large_intestine|Carcinoma_of_pancreas|Ovarian_Neoplasms|Epidermal_nevus_syndrome|Lung_cancer|RAS-associated_autoi…	0	0.024	D	0.517	P	0.361	B	0	D	1	D	3.245	M	-1.19	T	-5.27	D
54	nonsynonymous SNV	chr12	2	2	12q13.27	KMT2D	2	90	#49426614	49426614	Y	YES	No	YES	T>A	Transversion	T	A	NM_003482	exon39	c.A11874T	p.Q3958H	0/1	45	39	6	13.3333	0	0	0	0	0	0	0	D	0	B	0.002	B	.	.	1	N	0	N	-2.83	D	-1.17	N
55	nonsynonymous SNV	chr16	2	2	16p13.6	CREBBP	2	76	#3788618	3788618	N		No	YES	G>A	Transition	G	A	NM_001079846,NM_004380	exon25,exon26	c.C4222T,c.C4336T	p.R1408C,p.R1446C	0/1	365	268	97	26.5753	rs398124146	ID=COSM88749;OCCURENCE=2(salivary_gland),1(breast),20(haematopoietic_and_lymphoid_tissue),1(urinary_tract),1(pancreas),1(liver),2(oesophagus),1(skin),6(lung),2(cervix),2(upper_aerodigestive_tract),3(large_intestine),1(central_nervous_system),1(endometrium)	0	4.29	100947,Hepatocellular_carcinoma|Medulloblastoma|Transitional_cell_carcinoma_of_the_bladder|Squamous_cell_lung_carcinoma|Neoplasm_of_the_large_intestine|Squamous_cell_carcinoma_of_the_head_and_neck|Malignant_melanoma_of_skin|Uterine_cervical_neoplasms|Adenoid_cystic_carcinoma|Glioblastoma|Adenocarcinoma_of_stomach|Rubinstein-Taybi_syndrome_1|not_provided,Human_Phenotype_Ontology:HP:0001402\x2cMedG…	0	0.007	D	1	D	1	D	0	D	1	D	3.765	H	-3.4	D	-7.55	D
55	nonsynonymous SNV	chr13	2	2	13q12.3	FLT3	2	76	#28592620	28592620	N		No	YES	T>C	Transition	T	C	NM_004119	exon20	c.A2525G	p.Y842C	0/1	105	92	13	12.381	rs376588714	ID=COSM19692;OCCURENCE=5(haematopoietic_and_lymphoid_tissue)	7.7e-05	5.84	362981,Acute_myeloid_leukemia,Human_Phenotype_Ontology:HP:0004808\x2cMeSH:D015470\x2cMedGen:C0023467\x2cOMIM:601626\x2cOrphanet:ORPHA519\x2cSNOMED_CT:17788007,no_assertion_criteria_provided,Likely_pathogenic	0	0	D	1	D	1	D	0	D	1	D	2.535	M	-1.9	D	-8.17	D
57	nonframeshift substitution	chr17	3	3	17q12	ERBB2	3	95	37879582	37879583	Read END	YES	No		NA	NA	TC	GG	NM_001005862,exon21,c.1957_1958GG,ERBB2	exon20,c.1912_1913GG,ERBB2,NM_001289937	c.1867_1868GG,ERBB2,NM_004448,exon17	NM_001289936,exon17,c.1957_1958GG	0/1	123	75	48	34.4	0	0	0	0	0	0	.	.	.	.	.	.	.	.	.	.	.	.	.	.	.	.
57	nonsynonymous SNV	chr12	2	2	12q24.13	PTPN11	2	95	112926884	112926884	N		No	YES	T>C	Transition	T	C	NM_002834,NM_001330437	exon13,exon13	c.T1504C,c.T1516C	p.S502P,p.S506P	0/1	214	139	75	35.1	0	ID=COSM13020;OCCURENCE=1(genital_tract),2(large_intestine),13(haematopoietic_and_lymphoid_tissue)	0	5.13	0	0	0.041	D	0.742	P	0.518	P	0	D	1	D	1.285	L	-5.29	D	-4.6	D
58	nonsynonymous SNV	chr13	NA	NA	13q12.2	FLT3	NA	NA	#28608341	28608341	N		No	YES	T>C	Transition	T	C	NM_004119	exon14	c.A1715G	p.Y572C	0/1	323	177	146	45.2012	rs121913491	ID=COSM28044;OCCURENCE=7(haematopoietic_and_lymphoid_tissue)	0	5.83	363207,Acute_myeloid_leukemia,Human_Phenotype_Ontology:HP:0004808\x2cMeSH:D015470\x2cMedGen:C0023467\x2cOMIM:601626\x2cOrphanet:ORPHA519\x2cSNOMED_CT:17788007,no_assertion_criteria_provided,Likely_pathogenic	0	0	D	1	D	0.999	D	0	D	1	D	2.49	M	-1.39	T	-8.38	D
58	stopgain	chr17	NA	NA	17p11.3	NCOR1	NA	NA	#16068343	16068343	N		No	YES	G>A	Transition	G	A	NM_001190438,NM_001190440,NM_006311	exon2,exon4,exon5	c.C241T,c.C568T,c.C568T	p.R81X,p.R190X,p.R190X	0/1	1395	854	539	38.638	rs78230791	ID=COSM4129609,COSM4590772;OCCURENCE=2(thyroid),23(upper_aerodigestive_tract)	0	0	0	0	.	.	.	.	.	.	0	D	1	A	.	.	.	.	.	.
[truncated: 27 more columns]
