# Supplementary material for: Unique mutation and gene expression in High Hyperdiploid Acute Lymphoblastic Leukaemia with whole chromosome uniparental isodisomy
Source: Research Square preprint supplement (doi:10.21203/rs.3.rs-1349722/v1), 2022-02-16
Supplement: Supplementary file 5 [file 759428f539cb82c40ffbc16c.xlsx]

## Sheet: Pathways
Supplementary Table 7.1 Pathway analysis
	Pathway	1	2	3	4	5	6	7	8	9	10	11	12	13	14	15	16	17	18	19
UPD	Actin Cytoskeleton	EPS8	ITFG3	TRMT1L	PLK2	CITED2	FAM126A	ITGA8	LIMA1	GAS2	DYNLL1	DYNLL2	MYC	ENC1	RAC2	GAS2L3
	Amino Acid Metabolism	GCAT	MAT2A	AARS1	MCCC2
	AP-1 TF	FOSB	JUN	FOSB
	Cell Cycle	DYN11	PLK2	FOSB	TOB2	RHOB	DYNLL2	JUN	MYC	FOS	CSK2	ANAPC7
	Cell Death	CRADD	DYN11	PSK2	CITED2	AIM1	RHOB	GAS2	MYC	FOS
	Cellular Response to Stress	FOSB	AT53	HSPH1	DYNLL1	CITED2	HSPB1	AIM1	HDDC3	HEXIM1	JUN	IRF2	HSPA8	MYC	FOS
	DNA Repair	DYNLL1	DUSP1	ZNF365	NABP1	JUN	MYC	FOS
	Drug Resistance Target	ITFG3	DUSP1	SLC47A1
	EGFR	EPS8	RHOB	EREG
	Heat Shock Family	HSPH1	HSPB1	HSPD1	HSPA8
	K Channel	FGF14
	Lipid Metabolism	LIMA1	CBR1	BTN1A1	FAB5	HMGCS1	COA3	FAR2	ALDH3A2
	Metabolism of Proteins	UBE2S	ATF3
	Metabolism of RNA	TRMT1L	SRSF7	HNRNPAB	METTL13	HSPB1	DALDR3	TOB2	AARS1	RBM24	TOB1	HEXIM1	HSPA8	CSTF3	RRP9	SRBD1	PTCD2	RPL39L
	Mitochondria	ARG2	DYN11	DHRS2	GCAT	FH	SLC25A19	COQ10A	LETM2	MCCC2	PTCD2
	NADP/NADPH	DHRS2	HDDC3	CBR1
	Nitric Oxidase	DYN11
	Nucleoside Metabolism	NUDT18	NUDT4
	Protein Folding	HSPB1	HSPD1	HSPA8
	Redox/ROS	HDDC3	CBR1	ATOX1	HEBP1
	Signal Transduction	FGF14	FOSB	DUSP1	PLK2	CITED2	MYF6	ITGA8	RHOB	ADRB2	HLX	JUN	IRF2	MYC	FAB5	MAP3K12	HMGCS1	COA3	RAC2	NFXL1
	TP53 Regulated	CRADD	DYNLL1	PLK2	DHRS2	HSPB1	HEXIM1	JUN	MYC	FOS	FOSB
	Transport of Molecules	SLC47A1	SLC25A19	RHOB	DYNLL1	DYNLL2	CCDC132
	Tyrosine Kinase	FGF14
	Urea Cycle	ARG2
	Stem Cell Maintenance	NES	TAOK3	FH
	Retinoic Acid	HSPD1	FAB5	RDH10	LIRF1
	Chromatin Remodelling	HIST1H4J
	MAPK	HSPB1	MAP3K12	TAOK3
	Potassium Voltage	FGF14	KCNQ3
noUPD	Actin Cytoskeleton	S1PR1	SH3D19	CLIP2	FAM21C	PPP1R12A	SNTA1
	Amino Acid Metabolism	GNE	PTAR1	FURIN	NDUFAF5
	AP-1 TF
	Cell Cycle	NRAS	CCDC23	BOD1	PPP6C	CRNKL1
	Cell Death	BCL10	SH3GLB1	TSR2
	Cellular Response to Stress	NRAS	ASB7	FEM1B
	DNA Repair	SETMAR	POLE3
	Drug Resistance Target	TXNIP	ABL1
	EGFR	SH3D19	STAM1
	Heat Shock Family	DNAJB12
	K Channel
	Lipid Metabolism	S1PR1	GPAT2	TMEM86B	CERK
	Metabolism of Proteins
	Metabolism of RNA	GPBP1L1	BTF3	SYF2	TYW5	GPAT2	C1D	LSG1	QTRT2	TBP	GTF3C4	CLIP1	RNF6	MED4	NEMF	ALKBH1	LARP6	MEX3C	MBD2	USF2	HNRNPUL1	POLR3F	NCOA5	CRNKL1	SSR4	TSR2
	Mitochondria	SH3GLB1	GBAS	ATG4D	NDUFAF5
	NADP/NADPH
	Nitric Oxidase
	Nucleoside Metabolism
	Protein Folding	DNAJB12
	Redox/ROS	TXNIP	PEX13	BDH2
	Signal Transduction	GNE	PPP6C	STAM	GRAP	GRAPL
	TP53 Regulated	NCOA5	UBA1
	Transport of Molecules	SLC41A3
	Tyrosine Kinase
	Urea Cycle
	Stem Cell Maintenance
	Retinoic Acid
	Chromatin Remodelling	SETMAR	PCGF3	MBD2	ZNF431
	MAPK	PPP6C
	Potassium Voltage
	Vacuole Transport	TMEM50A
	Glucose Metab	TXNIP	FEM1B
	Sphingosine/Ganglioside	S1PR1	ST6GALNAC6	CERK
	Autophagy	SH3GLB1	TMEM39A	ATG4D
	Golgi/ER	SH3GLB1	TRIM23	SEC16B	STAM	RAB11FIP2	GOLT1B	COG3
	Glucocorticoid	TXNIP	GMEB1	HNRNPUL1
	Ubiquitin/E3-ligases	USP33	PEX13	TRIM23	FEM1B	ASB7	NTAN1	MEX3C	UBA1
	Sialic Acid Metab	ST3GAL5	GNE	ST6GALNAC6

## Sheet: Pathway-analysis using 84 genes
Supplementary Table 7.2 Pathway analysis using 84 protein coding differentially expressed genes.
State	Pathway identifier	Pathway name	#Entities found	#Entities total	Entities ratio	Entities pValue	Entities FDR	#Reactions found	#Reactions total	Reactions ratio	Species identifier	Species name	Submitted entities found	Mapped entities	Found reaction identifiers
UPD	R-HSA-8851680	Butyrophilin (BTN) family interactions	3	12	0.000826332	0.000143804	0.0478379	4	8	0.000595859	9606	Homo sapiens	BTN1A1		R-HSA-8851044;R-HSA-8938431;R-HSA-8851038;R-HSA-8851979
UPD	R-HSA-8939211	ESR-mediated signaling	9	256	0.0176284	0.000278552	0.0478379	20	111	0.00826754	9606	Homo sapiens	JUN;MYC;FOSB;HSPB1;HIST1H4J;FOS;EREG		R-HSA-9009065;R-HSA-9011981;R-HSA-9011949;R-HSA-9011983;R-HSA-9011950;R-HSA-9012000;R-HSA-9625465;R-HSA-9009378;R-HSA-9011941;R-HSA-9011975;R-HSA-9009371;R-HSA-9011997;R-HSA-9625479;R-HSA-9011966;R-HSA-9625482;R-HSA-9011985;R-HSA-9021072;R-HSA-9011984;R-HSA-9011952;R-HSA-9625487
UPD	R-HSA-9006931	Signaling by Nuclear Receptors	11	384	0.0264426	0.000338529	0.0478379	25	192	0.0143006	9606	Homo sapiens	JUN;FABP5;MYC;RDH10;FOSB;HSPB1;HIST1H4J;FOS;EREG		R-HSA-9011981;R-HSA-9011983;R-HSA-5362518;R-HSA-5422942;R-HSA-9011975;R-HSA-9009371;R-HSA-9011997;R-HSA-9625479;R-HSA-9625482;R-HSA-9011985;R-HSA-9021072;R-HSA-9011984;R-HSA-9625487;R-HSA-9009065;R-HSA-5634100;R-HSA-5622129;R-HSA-9011949;R-HSA-9011950;R-HSA-9012000;R-HSA-9625465;R-HSA-9009378;R-HSA-9011941;R-HSA-9011966;R-HSA-9011952;R-HSA-5633256
UPD	R-HSA-2262752	Cellular responses to stress	17	811	0.0558463	0.000344157	0.0478379	54	289	0.0215254	9606	Homo sapiens	RPL39L;HSPA8;JUN;ANAPC7;CITED2;HSPB1;FOS;DYNLL1;DYNLL2;ATOX1;HSPH1;UBE2S;HIST1H4J;ATF3;CAP2		R-HSA-3790137;R-HSA-3790130;R-HSA-3788725;R-HSA-3788724;R-HSA-3229089;R-HSA-3371554;R-HSA-3223200;R-HSA-4793819;R-HSA-450325;R-HSA-9653894;R-HSA-9653893;R-HSA-3697838;R-HSA-3788705;R-HSA-5252041;R-HSA-3788708;R-HSA-3229102;R-HSA-5251955;R-HSA-3222546;R-HSA-5251959;R-HSA-9635892;R-HSA-3371422;R-HSA-3222533;R-HSA-5251942;R-HSA-5082356;R-HSA-5252079;R-HSA-168136;R-HSA-5082369;R-HSA-3371518;R-HSA-378…
UPD	R-HSA-8953897	Cellular responses to external stimuli	17	829	0.0570858	0.000441992	0.0490611	54	320	0.0238344	9606	Homo sapiens	RPL39L;HSPA8;JUN;ANAPC7;CITED2;HSPB1;FOS;DYNLL1;DYNLL2;ATOX1;HSPH1;UBE2S;HIST1H4J;ATF3;CAP2		R-HSA-3790137;R-HSA-3790130;R-HSA-3788725;R-HSA-3788724;R-HSA-3229089;R-HSA-3371554;R-HSA-3223200;R-HSA-4793819;R-HSA-450325;R-HSA-9653894;R-HSA-9653893;R-HSA-3697838;R-HSA-3788705;R-HSA-5252041;R-HSA-3788708;R-HSA-3229102;R-HSA-5251955;R-HSA-3222546;R-HSA-5251959;R-HSA-9635892;R-HSA-3371422;R-HSA-3222533;R-HSA-5251942;R-HSA-5082356;R-HSA-5252079;R-HSA-168136;R-HSA-5082369;R-HSA-3371518;R-HSA-378…
UPD	R-HSA-8864260	Transcriptional regulation by the AP-2 (TFAP2) family of transcription factors	4	52	0.00358077	0.000940796	0.0771556	8	44	0.00327722	9606	Homo sapiens	CITED2;MYC;HSPD1		R-HSA-8869558;R-HSA-8869542;R-HSA-8864307;R-HSA-8865265;R-HSA-8865280;R-HSA-8864718;R-HSA-8864729;R-HSA-8865256
UPD	R-HSA-2559582	Senescence-Associated Secretory Phenotype (SASP)	5	91	0.00626635	0.000976653	0.0771556	12	22	0.00163861	9606	Homo sapiens	JUN;ANAPC7;UBE2S;HIST1H4J;FOS;ATF3		R-HSA-3790137;R-HSA-3788745;R-HSA-4568740;R-HSA-4568737;R-HSA-3797196;R-HSA-3788748;R-HSA-3788705;R-HSA-3790130;R-HSA-3797202;R-HSA-3788725;R-HSA-3788724;R-HSA-3788708
	Pathway identifier	Pathway name	#Entities found	#Entities total	Entities ratio	Entities pValue	Entities FDR	#Reactions found	#Reactions total	Reactions ratio	Species identifier	Species name	Submitted entities found	Mapped entities	Found reaction identifiers
noUPD	R-HSA-76066	RNA Polymerase III Transcription Initiation From Type 2 Promoter	3	27	0.00185925	0.000509976	0.0770389	4	4	0.000297929	9606	Homo sapiens	GTF3C4;TBP;POLR3F		R-HSA-112150;R-HSA-83805;R-HSA-83788;R-HSA-83790
noUPD	R-HSA-76061	RNA Polymerase III Transcription Initiation From Type 1 Promoter	3	28	0.00192811	0.000566462	0.0770389	4	5	0.000372412	9606	Homo sapiens	GTF3C4;TBP;POLR3F		R-HSA-76054;R-HSA-76056;R-HSA-83723;R-HSA-76060

## Sheet: Pathway-analysis using 89 genes
Supplementary Table 7.3 Pathway analysis using 89 protein coding differentially expressed genes.
State	Datasets	Database	Pathway identifier	Pathway name	#Entities found	#Entities total	Entities ratio	Entities pValue	Entities FDR	Reactions found	Reactions total	Reactions ratio	Species identifier	Species name	Submitted entities found	Mapped entities	Found reaction identifiers
UPD	71/221	Reactome	R-HSA-9006931	Signaling by Nuclear Receptors	11	385	0.0261531	2.18405e-05	0.00607168	25	191	0.014438	9606	Homo sapiens	JUN;FABP5;MYC;RDH10;FOSB;HSPB1;HIST1H4J;FOS;EREG		R-HSA-9011981;R-HSA-9011983;R-HSA-5362518;R-HSA-5422942;R-HSA-9011975;R-HSA-9009371;R-HSA-9011997;R-HSA-9625479;R-HSA-9625482;R-HSA-9011985;R-HSA-9021072;R-HSA-9011984;R-HSA-9625487;R-HSA-9009065;R-HSA-5634100;R-HSA-9011949;R-HSA-5622129;R-HSA-9011950;R-HSA-9012000;R-HSA-9625465;R-HSA-9009378;R-HSA-9011941;R-HSA-9011966;R-HSA-9011952;R-HSA-5633256
UPD	71/221	Reactome	R-HSA-8939211	ESR-mediated signaling	9	256	0.0173901	2.63986e-05	0.00607168	20	110	0.00831507	9606	Homo sapiens	JUN;MYC;FOSB;HSPB1;HIST1H4J;FOS;EREG		R-HSA-9009065;R-HSA-9011981;R-HSA-9011949;R-HSA-9011983;R-HSA-9011950;R-HSA-9012000;R-HSA-9625465;R-HSA-9009378;R-HSA-9011941;R-HSA-9011975;R-HSA-9009371;R-HSA-9011997;R-HSA-9625479;R-HSA-9011966;R-HSA-9625482;R-HSA-9011985;R-HSA-9021072;R-HSA-9011952;R-HSA-9011984;R-HSA-9625487
UPD	71/221	Reactome	R-HSA-9018519	Estrogen-dependent gene expression	6	154	0.0104612	0.000362841	0.0555146	15	66	0.00498904	9606	Homo sapiens	JUN;MYC;FOSB;HIST1H4J;FOS		R-HSA-9009065;R-HSA-9011981;R-HSA-9011949;R-HSA-9011983;R-HSA-9011950;R-HSA-9012000;R-HSA-9009378;R-HSA-9011941;R-HSA-9011975;R-HSA-9009371;R-HSA-9011997;R-HSA-9011966;R-HSA-9011985;R-HSA-9011952;R-HSA-9011984
UPD	71/221	Reactome	R-HSA-2262752	Cellular responses to stress	12	700	0.0475511	0.00104433	0.0570926	37	230	0.017386	9606	Homo sapiens	JUN;HSPH1;UBE2S;CITED2;HSPB1;HIST1H4J;FOS;DYNLL1;ATF3;CAP2		R-HSA-3790137;R-HSA-168136;R-HSA-3790130;R-HSA-3788725;R-HSA-5082369;R-HSA-3788724;R-HSA-3371518;R-HSA-3229089;R-HSA-3223200;R-HSA-3371554;R-HSA-4793819;R-HSA-450325;R-HSA-9653894;R-HSA-9653893;R-HSA-3785711;R-HSA-3240295;R-HSA-3788705;R-HSA-3788708;R-HSA-5082384;R-HSA-1791173;R-HSA-3229102;R-HSA-4568740;R-HSA-3222546;R-HSA-4568737;R-HSA-1234167;R-HSA-9635892;R-HSA-3797202;R-HSA-3788745;R-HSA-322…
UPD	71/221	Reactome	R-HSA-8953897	Cellular responses to external stimuli	12	718	0.0487739	0.00129641	0.0570926	37	261	0.0197294	9606	Homo sapiens	JUN;HSPH1;UBE2S;CITED2;HSPB1;HIST1H4J;FOS;DYNLL1;ATF3;CAP2		R-HSA-3790137;R-HSA-168136;R-HSA-3790130;R-HSA-3788725;R-HSA-5082369;R-HSA-3788724;R-HSA-3371518;R-HSA-3229089;R-HSA-3223200;R-HSA-3371554;R-HSA-4793819;R-HSA-450325;R-HSA-9653894;R-HSA-9653893;R-HSA-3785711;R-HSA-3240295;R-HSA-3788705;R-HSA-3788708;R-HSA-5082384;R-HSA-1791173;R-HSA-3229102;R-HSA-4568740;R-HSA-3222546;R-HSA-4568737;R-HSA-1234167;R-HSA-9635892;R-HSA-3797202;R-HSA-3788745;R-HSA-322…
UPD	71/221	Reactome	R-HSA-2559582	Senescence-Associated Secretory Phenotype (SASP)	4	91	0.00618165	0.00234817	0.0570926	12	22	0.00166301	9606	Homo sapiens	JUN;UBE2S;HIST1H4J;FOS		R-HSA-3788745;R-HSA-3790137;R-HSA-4568740;R-HSA-4568737;R-HSA-3788748;R-HSA-3797196;R-HSA-3788705;R-HSA-3797202;R-HSA-3790130;R-HSA-3788725;R-HSA-3788724;R-HSA-3788708
UPD	71/221	Reactome	R-HSA-9634638	Estrogen-dependent nuclear events downstream of ESR-membrane signaling	3	29	0.00196997	0.00076495	0.0570926	2	12	0.000907098	9606	Homo sapiens	FOS;EREG		R-HSA-9625479;R-HSA-9625465
UPD	71/221	Reactome	R-HSA-888593	Reuptake of GABA	2	10	0.000679302	0.00173738	0.0570926	2	2	0.000151183	9606	Homo sapiens	SLC6A12		R-HSA-444007;R-HSA-352029
UPD	71/221	Reactome	R-HSA-4411364	Binding of TCF/LEF:CTNNB1 to target gene promoters	2	10	0.000679302	0.00173738	0.0570926	2	4	0.000302366	9606	Homo sapiens	MYC		R-HSA-4411367;R-HSA-4411357
UPD	71/221	Reactome	R-HSA-8951430	RUNX3 regulates WNT signaling	2	10	0.000679302	0.00173738	0.0570926	2	5	0.000377958	9606	Homo sapiens	MYC		R-HSA-4411367;R-HSA-4411357
UPD	71/221	Reactome	R-HSA-450341	Activation of the AP-1 family of transcription factors	2	12	0.000815162	0.00248229	0.0570926	4	5	0.000377958	9606	Homo sapiens	JUN;FOS		R-HSA-450292;R-HSA-450325;R-HSA-168440;R-HSA-168136
UPD	71/221	Reactome	R-HSA-5687128	MAPK6/MAPK4 signaling	4	106	0.0072006	0.0040377	0.0847917	6	40	0.00302366	9606	Homo sapiens	JUN;MYC;HSPB1		R-HSA-5692788;R-HSA-5687121;R-HSA-5687115;R-HSA-5687083;R-HSA-5692761;R-HSA-5687113
UPD	71/221	Reactome	R-HSA-4641265	Repression of WNT target genes	2	16	0.00108688	0.00434438	0.0868876	4	7	0.000529141	9606	Homo sapiens	MYC		R-HSA-8944349;R-HSA-8944352;R-HSA-4641231;R-HSA-5229348
UPD	71/221	Reactome	R-HSA-9009391	Extra-nuclear estrogen signaling	4	110	0.00747232	0.00459818	0.0919637	5	38	0.00287248	9606	Homo sapiens	HSPB1;FOS;EREG		R-HSA-9625479;R-HSA-9625482;R-HSA-9021072;R-HSA-9625465;R-HSA-9625487
noUPD	18/221	Reactome	R-HSA-8875360	InlB-mediated entry of Listeria monocytogenes into host cell	2	19	0.00129067	0.000344156	0.0172556	1	8	0.000604732	9606	Homo sapiens	STAM		R-HSA-8876262
noUPD	18/221	Reactome	R-HSA-6807004	Negative regulation of MET activity	2	25	0.00169825	0.000592774	0.0172556	1	10	0.000755915	9606	Homo sapiens	STAM		R-HSA-8875490
noUPD	18/221	Reactome	R-HSA-8876384	Listeria monocytogenes entry into host cells	2	27	0.00183411	0.000690225	0.0172556	1	13	0.00098269	9606	Homo sapiens	STAM		R-HSA-8876262
noUPD	18/221	Reactome	R-HSA-917729	Endosomal Sorting Complex Required For Transport (ESCRT)	2	35	0.00237756	0.0011519	0.0192765	1	4	0.000302366	9606	Homo sapiens	STAM		R-HSA-917730
noUPD	18/221	Reactome	R-HSA-182971	EGFR downregulation	2	37	0.00251342	0.0012851	0.0192765	6	22	0.00166301	9606	Homo sapiens	STAM		R-HSA-8867047;R-HSA-183072;R-HSA-8867044;R-HSA-8867041;R-HSA-182986;R-HSA-182990
noUPD	18/221	Reactome	R-HSA-177929	Signaling by EGFR	2	61	0.00414374	0.00342176	0.0410611	6	49	0.00370398	9606	Homo sapiens	STAM		R-HSA-8867047;R-HSA-183072;R-HSA-8867044;R-HSA-8867041;R-HSA-182986;R-HSA-182990
noUPD	18/221	Reactome	R-HSA-6806834	Signaling by MET	2	88	0.00597785	0.00695839	0.0695839	1	49	0.00370398	9606	Homo sapiens	STAM		R-HSA-8875490
noUPD	18/221	Reactome	R-HSA-9006934	Signaling by Receptor Tyrosine Kinases	4	629	0.0427281	0.0111258	0.0850131	9	704	0.0532164	9606	Homo sapiens	GRAP;STAM		R-HSA-8867047;R-HSA-183072;R-HSA-8867044;R-HSA-8875490;R-HSA-8867041;R-HSA-182986;R-HSA-1433501;R-HSA-182990;R-HSA-9612639
noUPD	18/221	Reactome	R-HSA-8856825	Cargo recognition for clathrin-mediated endocytosis	2	116	0.0078799	0.0118048	0.0850131	1	15	0.00113387	9606	Homo sapiens	STAM		R-HSA-8866279
noUPD	18/221	Reactome	R-HSA-4411364	Binding of TCF/LEF:CTNNB1 to target gene promoters	1	10	0.000679302	0.0141688	0.0850131	2	4	0.000302366	9606	Homo sapiens	TCF7		R-HSA-4411351;R-HSA-4411372
noUPD	18/221	Reactome	R-HSA-8951430	RUNX3 regulates WNT signaling	1	10	0.000679302	0.0141688	0.0850131	1	5	0.000377958	9606	Homo sapiens	TCF7		R-HSA-8951428
			NAME	GS<br> follow link to MSigDB	GS DETAILS	SIZE	ES	NES	NOM p-val	FDR q-val	FWER p-val	RANK AT MAX	LEADING EDGE
UPD	~20K	KEGG	KEGG_ARGININE_AND_PROLINE_METABOLISM	KEGG_ARGININE_AND_PROLINE_METABOLISM	Details ...	52	0.603848	1.94596	0	0.0709741	0.058	4199	tags=42%, list=21%, signal=53%

## Sheet: Pathway-analysis using 221 gene
Supplementary Table 7.4 Pathway analysis using 221 protein coding differentially expressed genes.
State	Pathway identifier	Pathway name	#Entities found	#Entities total	Entities ratio	Entities pValue	Entities FDR	#Reactions found	#Reactions total	Reactions ratio	Species identifier	Species name	Submitted entities found	Found reaction identifiers
UPD	R-HSA-8939211	ESR-mediated signaling	9	257	0.0180085	0.000656006	0.156864	20	111	0.00817559	9606	Homo sapiens	JUN;MYC;FOSB;HSPB1;HIST1H4J;FOS;EREG	R-HSA-9009065;R-HSA-9011981;R-HSA-9011949;R-HSA-9011983;R-HSA-9011950;R-HSA-9012000;R-HSA-9625465;R-HSA-9009378;R-HSA-9011941;R-HSA-9011975;R-HSA-9009371;R-HSA-9011997;R-HSA-9625479;R-HSA-9011966;R-HSA-9625482;R-HSA-9011985;R-HSA-9021072;R-HSA-9011984;R-HSA-9011952;R-HSA-9625487
UPD	R-HSA-9006931	Signaling by Nuclear Receptors	11	387	0.0271179	0.00093655	0.156864	25	192	0.0141416	9606	Homo sapiens	JUN;FABP5;MYC;RDH10;FOSB;HSPB1;HIST1H4J;FOS;EREG	R-HSA-9011981;R-HSA-9011983;R-HSA-5362518;R-HSA-5422942;R-HSA-9011975;R-HSA-9009371;R-HSA-9011997;R-HSA-9625479;R-HSA-9625482;R-HSA-9011985;R-HSA-9021072;R-HSA-9011984;R-HSA-9625487;R-HSA-9009065;R-HSA-5634100;R-HSA-5622129;R-HSA-9011949;R-HSA-9011950;R-HSA-9012000;R-HSA-9625465;R-HSA-9009378;R-HSA-9011941;R-HSA-9011966;R-HSA-9011952;R-HSA-5633256
UPD	R-HSA-8864260	Transcriptional regulation by the AP-2 (TFAP2) family of transcription factors	4	52	0.00364375	0.00142974	0.156864	8	44	0.00324077	9606	Homo sapiens	CITED2;MYC;HSPD1	R-HSA-8869558;R-HSA-8869542;R-HSA-8864307;R-HSA-8865265;R-HSA-8865280;R-HSA-8864718;R-HSA-8864729;R-HSA-8865256
UPD	R-HSA-2559582	Senescence-Associated Secretory Phenotype (SASP)	5	91	0.00637657	0.00161411	0.156864	12	22	0.00162039	9606	Homo sapiens	JUN;ANAPC7;UBE2S;HIST1H4J;FOS	R-HSA-3790137;R-HSA-3788745;R-HSA-4568740;R-HSA-4568737;R-HSA-3797196;R-HSA-3788748;R-HSA-3788705;R-HSA-3790130;R-HSA-3797202;R-HSA-3788725;R-HSA-3788724;R-HSA-3788708
UPD	R-HSA-9634638	Estrogen-dependent nuclear events downstream of ESR-membrane signaling	3	29	0.00203209	0.00253077	0.156864	2	12	0.000883848	9606	Homo sapiens	FOS;EREG	R-HSA-9625479;R-HSA-9625465
UPD	R-HSA-9018519	Estrogen-dependent gene expression	6	154	0.0107911	0.00313585	0.156864	15	66	0.00486116	9606	Homo sapiens	JUN;MYC;FOSB;HIST1H4J;FOS	R-HSA-9009065;R-HSA-9011981;R-HSA-9011949;R-HSA-9011983;R-HSA-9011950;R-HSA-9012000;R-HSA-9009378;R-HSA-9011941;R-HSA-9011975;R-HSA-9009371;R-HSA-9011997;R-HSA-9011966;R-HSA-9011985;R-HSA-9011984;R-HSA-9011952
UPD	R-HSA-8869496	TFAP2A acts as a transcriptional repressor during retinoic acid induced cell differentiation	2	9	0.00063065	0.00320835	0.156864	2	7	0.000515578	9606	Homo sapiens	HSPD1	R-HSA-8869558;R-HSA-8869542
UPD	R-HSA-4411364	Binding of TCF/LEF:CTNNB1 to target gene promoters	2	10	0.000700722	0.00393728	0.156864	2	4	0.000294616	9606	Homo sapiens	MYC	R-HSA-4411367;R-HSA-4411357
UPD	R-HSA-8951430	RUNX3 regulates WNT signaling	2	10	0.000700722	0.00393728	0.156864	2	5	0.00036827	9606	Homo sapiens	MYC	R-HSA-4411367;R-HSA-4411357
UPD	R-HSA-3371497	HSP90 chaperone cycle for steroid hormone receptors (SHR) in the presence of ligand	4	72	0.0050452	0.00456787	0.156864	9	16	0.00117846	9606	Homo sapiens	HSPA8;DYNLL1;DYNLL2;CAP2	R-HSA-5618085;R-HSA-5618080;R-HSA-3371590;R-HSA-5618098;R-HSA-5618110;R-HSA-3371503;R-HSA-5618105;R-HSA-3371422;R-HSA-5618107
UPD	R-HSA-450341	Activation of the AP-1 family of transcription factors	2	12	0.000840866	0.00560229	0.156864	4	5	0.00036827	9606	Homo sapiens	JUN;FOS	R-HSA-450292;R-HSA-450325;R-HSA-168440;R-HSA-168136
UPD	R-HSA-2262752	Cellular responses to stress	17	952	0.0667087	0.00648194	0.168531	54	381	0.0280622	9606	Homo sapiens	RPL39L;HSPA8;JUN;ANAPC7;CITED2;HSPB1;FOS;DYNLL1;DYNLL2;ATOX1;HSPH1;UBE2S;HIST1H4J;ATF3;CAP2	R-HSA-3790137;R-HSA-3790130;R-HSA-3788725;R-HSA-3788724;R-HSA-3229089;R-HSA-3371554;R-HSA-3223200;R-HSA-4793819;R-HSA-450325;R-HSA-9653894;R-HSA-9653893;R-HSA-3697838;R-HSA-3788705;R-HSA-5252041;R-HSA-3788708;R-HSA-3229102;R-HSA-5251955;R-HSA-3222546;R-HSA-5251959;R-HSA-9635892;R-HSA-3371422;R-HSA-3222533;R-HSA-5251942;R-HSA-5082356;R-HSA-5252079;R-HSA-168136;R-HSA-5082369;R-HSA-3371518;R-HSA-378…
UPD	R-HSA-8953897	Cellular responses to stimuli	17	970	0.06797	0.00775193	0.193798	54	412	0.0303454	9606	Homo sapiens	RPL39L;HSPA8;JUN;ANAPC7;CITED2;HSPB1;FOS;DYNLL1;DYNLL2;ATOX1;HSPH1;UBE2S;HIST1H4J;ATF3;CAP2	R-HSA-3790137;R-HSA-3790130;R-HSA-3788725;R-HSA-3788724;R-HSA-3229089;R-HSA-3371554;R-HSA-3223200;R-HSA-4793819;R-HSA-450325;R-HSA-9653894;R-HSA-9653893;R-HSA-3697838;R-HSA-3788705;R-HSA-5252041;R-HSA-3788708;R-HSA-3229102;R-HSA-5251955;R-HSA-3222546;R-HSA-5251959;R-HSA-9635892;R-HSA-3371422;R-HSA-3222533;R-HSA-5251942;R-HSA-5082356;R-HSA-5252079;R-HSA-168136;R-HSA-5082369;R-HSA-3371518;R-HSA-378…
noUPD	R-HSA-74160	Gene expression (Transcription)	28	1855	0.129984	0.000505128	0.124936	77	1006	0.0740959	9606	Homo sapiens	GTF3C4;ZNF492;TCF7;CLP1;ABL1;ZNF624;ZNF101;ZNF264;ZNF440;ZNF484;TBP;ZNF383;MBD2;ZNF180;MED4;ZNF14;ZNF738;ZNF615;POLR3F;ZNF416;ZNF317;TXNIP;ZNF436;ZNF776;ZNF675;ZNF211;ZNF431	R-HSA-73729;R-HSA-8985227;R-HSA-212352;R-HSA-73736;R-HSA-73739;R-HSA-83723;R-HSA-8951428;R-HSA-112149;R-HSA-112150;R-HSA-76054;R-HSA-112153;R-HSA-112152;R-HSA-6810238;R-HSA-76056;R-HSA-77592;R-HSA-112155;R-HSA-6810235;R-HSA-112156;R-HSA-76060;R-HSA-6810234;R-HSA-6810233;R-HSA-73758;R-HSA-212380;R-HSA-5250930;R-HSA-113442;R-HSA-9613494;R-HSA-113446;R-HSA-73769;R-HSA-5211239;R-HSA-113705;R-HSA-1134…
noUPD	R-HSA-212436	Generic Transcription Pathway	24	1555	0.108962	0.00102554	0.124936	10	830	0.0611328	9606	Homo sapiens	ZNF264;ZNF440;ZNF484;TBP;ZNF383;ZNF492;TCF7;ZNF180;MED4;ZNF14;ZNF738;ZNF615;ABL1;ZNF416;ZNF317;TXNIP;ZNF624;ZNF436;ZNF776;ZNF675;ZNF211;ZNF101;ZNF431	R-HSA-6805399;R-HSA-8985227;R-HSA-212352;R-HSA-212432;R-HSA-9617735;R-HSA-8956639;R-HSA-8956659;R-HSA-8951428;R-HSA-975040;R-HSA-212380
noUPD	R-HSA-76066	RNA Polymerase III Transcription Initiation From Type 2 Promoter	3	27	0.00189195	0.00135742	0.124936	4	4	0.000294616	9606	Homo sapiens	GTF3C4;TBP;POLR3F	R-HSA-112150;R-HSA-83805;R-HSA-83788;R-HSA-83790
noUPD	R-HSA-73857	RNA Polymerase II Transcription	25	1694	0.118702	0.00149249	0.124936	38	891	0.0656257	9606	Homo sapiens	ZNF264;ZNF440;ZNF484;TBP;ZNF383;ZNF492;TCF7;ZNF180;MED4;ZNF14;CLP1;ZNF738;ZNF615;ABL1;ZNF416;ZNF317;TXNIP;ZNF624;ZNF436;ZNF776;ZNF675;ZNF101;ZNF211;ZNF431	R-HSA-6814885;R-HSA-8985227;R-HSA-212352;R-HSA-109637;R-HSA-109636;R-HSA-109639;R-HSA-109638;R-HSA-75850;R-HSA-8951428;R-HSA-975040;R-HSA-75856;R-HSA-212432;R-HSA-75861;R-HSA-9617735;R-HSA-75095;R-HSA-75862;R-HSA-8956639;R-HSA-75864;R-HSA-6810238;R-HSA-77592;R-HSA-73946;R-HSA-75866;R-HSA-75869;R-HSA-6810235;R-HSA-6810234;R-HSA-6810233;R-HSA-212380;R-HSA-75873;R-HSA-9613494;R-HSA-9613497;R-HSA-759…
noUPD	R-HSA-76061	RNA Polymerase III Transcription Initiation From Type 1 Promoter	3	28	0.00196202	0.00150526	0.124936	4	5	0.00036827	9606	Homo sapiens	GTF3C4;TBP;POLR3F	R-HSA-76054;R-HSA-76056;R-HSA-83723;R-HSA-76060
