# Supplementary material for: Unique mutation and gene expression in High Hyperdiploid Acute Lymphoblastic Leukaemia with whole chromosome uniparental isodisomy
Source: Research Square preprint supplement (doi:10.21203/rs.3.rs-1349722/v1), 2022-02-16
Supplement: Supplementary file 7 [file e6f9091e79afcc2dfe9ca734.xlsx]

## Sheet: 6.1
Supplementary Table 6.1 221 differentially expressed genes
	Ensembl ID	Protein	UCSC Link	Location GRCh37.p13	logFC	logCPM	F	PValue	FDR	ihw.padj	Name and Function
UPregulated	ENSG00000004766.11	CCDC132	CCDC132	93,232,340 - 93,361,123	0.626685	5.71367	11.5361	0.00196327	0.122049	0.0990264	Syndetin, EARP complex RAB endosomes
	ENSG00000010165.15	METTL13	METTL13	171,781,621 - 171,797,716	1.21889	2.73678	17.7311	0.000217737	0.0776263	0.0645969	methyltransferase - elongation factor
	ENSG00000010319.2	SEMA3G	SEMA3G	52,433,035 - 52,445,113	1.79736	1.01277	13.5023	0.000939097	0.093412	0.098667	Semaphorin-3G, activated by PPARg
	ENSG00000013583.4	HEBP1	HEBP1	12,974,864 - 13,000,309	0.753235	3.02274	10.4174	0.003045	0.137472	0.0990264	Heme-binding protein 1
	ENSG00000049883.10	PTCD2	PTCD2	72,320,367 - 72,368,395	0.73044	2.63155	10.6801	0.00274304	0.134043	0.0985871	Pentatricopeptide repeat-containing protein 2, mitochondrial dev
	ENSG00000050405.9	LIMA1	LIMA1	50,175,780 - 50,283,570	1.27118	0.732627	15.4812	0.00046474	0.0801917	0.0807562	LIM domain and actin-binding protein 1
	ENSG00000064763.6	FAR2	FAR2	29,149,003 - 29,335,617	0.802713	5.78398	12.0329	0.00162314	0.11362	0.0796662	Fatty acyl-CoA reductase 2
	ENSG00000068784.8	SRBD1	SRBD1	45,388,680 - 45,611,294	1.13226	6.12436	11.7137	0.00183355	0.121106	0.098667	S1 RNA-binding domain-containing protein 1
	ENSG00000072210.14	ALDH3A2	ALDH3A2	19,648,146 - 19,677,596	1.34168	3.4155	11.6793	0.00185796	0.121106	0.098667	Aldehyde dehydrogenase family
	ENSG00000077943.7	ITGA8	ITGA8	15,513,949 - 15,720,335	2.74965	2.61484	15.5166	0.000459084	0.0801917	0.0726163	Integrin alpha 8
	ENSG00000081181.3	ARG2	ARG2	67,619,862 - 67,651,720	2.12994	3.45168	29.4269	7.31139e-06	0.0235427	0.0126403	extra-Urea cycle and Nitrogen Metab, Mitochondria
	ENSG00000088986.6	DYNLL1	DYNLL1	120,469,857 - 120,498,495	1.41018	4.7913	24.3574	2.88632e-05	0.0387248	0.0298004	vesicle transport, cytoskeletal structure, BCL2L11, NO, BCL2, Autophagy
	ENSG00000090861.11	AARS	AARS	70,252,295 - 70,289,509	0.856579	5.05293	15.445	0.000470609	0.0801917	0.0726163	Alanine--tRNA ligase,
	ENSG00000091483.6	FH	FH	241,497,557 - 241,519,785	0.756951	4.32902	17.1448	0.000264251	0.0789197	0.0661011	Fumarate hydratase, mitochondrial malate pathway, TCA. cycle
	ENSG00000100095.14	SEZ6L	SEZ6L	26,169,474 - 26,383,597	1.66755	0.351809	19.3651	0.000128696	0.0607173	0.0803452	Seizure 6-like protein
	ENSG00000100116.12	GCAT	GCAT	37,807,894 - 37,817,177	1.80582	3.25668	19.1834	0.000136313	0.0607173	0.0404701	2-amino-3-ketobutyrate coenzyme A ligase, mitochondrial
	ENSG00000100867.10	DHRS2	DHRS2	23,630,115 - 23,645,639	4.57993	-1.32335	19.2499	0.000133472	0.0607173	0.068069	Dehydrogenase/reductase, NADPH, mitochondria
	ENSG00000102466.11	FGF14	FGF14	101,720,855 - 102,402,428	5.48485	2.30839	30.9826	4.91859e-06	0.0235427	0.0119273	Receptor TK signalling, mitogenic and cell survival
	ENSG00000103351.8	CLUAP1	CLUAP1	3,500,931 - 3,539,048	0.82167	2.02422	14.4285	0.000672585	0.0859414	0.0954283	clusterin associated protein 1
	ENSG00000104044.11	OCA2	OCA2	27,719,008 - 28,099,342	2.73432	2.89877	14.1252	0.000749589	0.0880904	0.0774371	melanosomal transmembrane protein
	ENSG00000106211.8	HSPB1	HSPB1	76,302,558 - 76,304,301	2.34463	6.22989	17.539	0.000231931	0.0789197	0.0661011	heat shock protein family B
	ENSG00000108106.9	UBE2S	UBE2S	55,401,282 - 55,408,439	1.22503	5.55829	23.3694	3.83287e-05	0.0406636	0.0316942	Ubiquitin-conjugating enzyme E2 S
	ENSG00000109971.9	HSPA8	HSPA8	123,057,492 - 123,062,366	0.848994	8.83966	13.6108	0.000902699	0.093412	0.0805599	Heat shock cognate 71 kDa protein (Hsp70)
	ENSG00000110925.2	CSRNP2	CSRNP2	51,061,205 - 51,083,671	0.852543	3.89202	21.739	6.19875e-05	0.044413	0.0375085	cysteine and serine rich nuclear protein 2
	ENSG00000111046.3	MYF6	MYF6	80,707,629 - 80,709,478	7.41704	0.185419	19.9644	0.000245945	0.0789197	0.0964273	Myogenic factor 6, DNA binding TF
	ENSG00000111181.8	SLC6A12	SLC6A12	190,077 - 214,20	2.8678	-1.47485	19.0332	0.000142976	0.0607173	0.068069	Sodium- and chloride-dependent betaine transporter
	ENSG00000112186.7	CAP2	CAP2	17,393,216 - 17,557,792	2.16615	1.68446	21.1542	7.39523e-05	0.0461486	0.0502817	Adenylyl cyclase-associated protein 2
	ENSG00000112972.10	HMGCS1	HMGCS1	43,287,470 - 43,313,512	0.681537	5.45568	13.1002	0.00108835	0.0994117	0.0730641	Hydroxymethylglutaryl-CoA synthase
	ENSG00000114487.5	MORC1	MORC1	108,958,239 - 109,118,146	2.54516	-0.0432221	16.2927	0.000351843	0.0801917	0.0803452	signaling-dependent chromatin remodeling and epigenetic regulation
	ENSG00000114767.6	RRP9	RRP9	51,933,426 - 51,941,941	0.787307	2.64315	12.4471	0.00138794	0.10786	0.0921555	U3 small nucleolar RNA-interacting protein 2, proceses 18S rRNA
	ENSG00000115875.14	SRSF7	SRSF7	38,743,599 - 38,751,494	0.871715	8.02248	19.8452	0.00011068	0.0574822	0.0437047	Serine/arginine-rich splicing factor, arcRNA, nuclear bodies
	ENSG00000120129.5	DUSP1	DUSP1	172,768,090 - 172,771,200	1.16229	9.08892	23.5853	3.60073e-05	0.0406636	0.0368732	dual specificity phosphatase, MAPKinase
	ENSG00000120694.15	HSPH1	HSPH1	31,134,974 - 31,162,388	1.1484	5.91593	24.8436	2.51545e-05	0.0387248	0.0298004	Heat shock protein 105 kDa, HSP70 family
	ENSG00000121039.5	RDH10	RDH10	73,294,602 - 73,325,285	1.63514	3.77797	12.8339	0.00120115	0.101251	0.0884899	Retinol dehydrogenase 10
	ENSG00000121486.7	TRMT1L	TRMT1L	185,118,085 - 185,157,098	0.92138	4.1405	23.1873	4.0411e-05	0.0406636	0.0316849	tRNA methyltransferase 1 like
	ENSG00000121931.11	LRIF1	LRIF1	110,877,252 - 110,963,962	0.834662	3.19068	11.1525	0.00227832	0.129569	0.094293	Retinoic acid receptor heterochromatin
	ENSG00000122591.7	FAM126A	FAM126A	22,895,848 - 23,014,151	0.68822	5.70752	16.9747	0.000279657	0.0789908	0.0678991	Hyccin, PdIns4P
	ENSG00000123975.4	CKS2	CKS2	89,311,195 - 89,316,703	0.844032	6.59702	11.9837	0.00165381	0.114769	0.098667	Cyclin-dependent kinases regulatory subunit 2
	ENSG00000124557.8	BTN1A1	BTN1A1	26,499,290 - 26,510,425	2.52145	-1.89883	13.9602	0.000795404	0.0901832	0.0990264	Butyrophilin subfamily 1 member A1
	ENSG00000124882.3	EREG	EREG	74,365,143 - 74,388,760	1.87882	3.2861	12.6051	0.0013081	0.106365	0.0796662	Proepiregulin
	ENSG00000125454.7	SLC25A19	SLC25A19	75,272,980 - 75,289,958	0.993336	2.80873	15.4372	0.00047188	0.0801917	0.0726163	Mitochondrial thiamine pyrophosphate carrier
	ENSG00000125740.9	FOSB	FOSB	45,467,995 - 45,475,179	1.86667	8.39378	30.5549	5.47901e-06	0.0235427	0.0119273	TF, RNA pol interacct with JUN
	ENSG00000128340.10	RAC2	RAC2	37,225,261 - 37,244,299	0.631432	5.57007	12.2134	0.00151575	0.109875	0.0964273	ICAM1 adhesion
	ENSG00000131844.11	MCCC2	MCCC2	71,587,288 - 71,658,706	0.590563	4.41412	11.831	0.00175305	0.119089	0.0990264	Methylcrotonoyl-CoA carboxylase beta chain, mitochondrial
	ENSG00000132688.10	NES	NES	156,668,763 - 156,677,397	2.34496	-2.35213	14.8092	0.00058774	0.0801917	0.0921555	Nestin, cytoskeleton
	ENSG00000135090.9	TAOK3	TAOK3	118,149,801 - 118,372,950	0.764164	6.7417	12.4903	0.00136559	0.10786	0.0921555	Serine/threonine-protein kinase
	ENSG00000135469.9	COQ10A	COQ10A	56,266,858 - 56,270,966	0.886588	3.95469	14.3767	0.000685117	0.0861838	0.0746612	Coenzyme Q-binding protein COQ10 homolog A, mitochondrial
	ENSG00000136630.11	HLX	HLX	220,879,401 - 220,885,05	1.07974	5.14006	15.1289	0.000525358	0.0801917	0.068069	H2.0-like homeobox protein, TF, high level in activated lymphocytes
	ENSG00000136997.10	MYC	MYC	127,735,434 - 127,742,951	1.20012	5.212	13.4987	0.000940324	0.093412	0.0818811	MYC
	ENSG00000137494.9	ANKRD42	ANKRD42	83,193,739 - 83,256,099	1.09864	3.90727	14.0303	0.000775587	0.0892398	0.098667	Ankyrin repeat domain-containing protein
	ENSG00000138311.11	ZNF365	ZNF365	62,374,157 - 62,672,011	1.49105	1.2462	18.1133	0.000192196	0.0736753	0.0698384	DNA strand resection and MRE-11 DS repair
	ENSG00000139354.6	GAS2L3	GAS2L3	100,573,661 - 100,628,288	1.71557	5.62244	11.7888	0.00178158	0.120014	0.0985871	GAS2-like protein 3
	ENSG00000139625.8	MAP3K12	MAP3K12	53,479,669 - 53,501,205	0.820871	3.16567	13.4511	0.000956824	0.093412	0.0838503	mitogen-activated protein kinase kinase kinase 12
	ENSG00000141232.4	TOB1	TOB1	50,862,223 - 50,867,978	1.20589	5.22653	15.1408	0.000523188	0.0801917	0.0730641	member of the transducer of erbB-2 /BTG protein famil
	ENSG00000142494.9	SLC47A1	SLC47A1	19,533,854 - 19,579,033	2.78213	1.30972	17.6749	0.000221789	0.0776263	0.0711103	Multidrug and toxin extrusion protein 1
	ENSG00000143878.8	RHOB	RHOB	20,447,071 - 20,449,445	2.25642	8.90549	15.3795	0.000481433	0.0801917	0.0757284	Ras Family Rho-related GTP-binding protein
	ENSG00000144381.12	HSPD1	HSPD1	197,486,584 - 197,500,274	0.863549	7.11259	14.3546	0.000690541	0.0861838	0.0774371	60 kDa heat shock protein, mitochondrial
	ENSG00000145103.8	ILDR1	ILDR1	121,987,323 - 122,060,554	1.64664	1.23702	16.675	0.000309205	0.0801917	0.0774371	Immunoglobulin-like domain-containing receptor 1
	ENSG00000145632.10	PLK2	PLK2	58,453,982 - 58,460,139	1.65089	5.76493	20.9962	7.75944e-05	0.0461486	0.0404701	Serine/threonine-protein kinase. Polo like kinase 2, RAS, RAP
	ENSG00000148935.6	GAS2	GAS2	22,627,758 - 22,885,930	0.915885	2.00264	14.8624	0.000576833	0.0801917	0.0921555	Growth arrest protein, actin cyctoskeleton
	ENSG00000151491.8	EPS8	EPS8	15,620,141 - 15,789,576	1.64985	3.20095	28.1857	1.01119e-05	0.0262984	0.0119273	epidermal growth factor receptor pathway substrate 8
	ENSG00000159228.8	CBR1	CBR1	36,069,924 - 36,073,177	1.3412	2.35683	14.1572	0.000741034	0.0878884	0.0796662	Carbonyl reductase [NADPH] 1
	ENSG00000162772.12	ATF3	ATF3	212,565,334 - 212,620,777	1.91068	7.95594	25.1233	2.32549e-05	0.0387248	0.0298004	cAMP dependendent transcription factor 3
	ENSG00000163568.9	AIM2	AIM2	159,059,226 - 159,132,351	2.41916	2.22401	16.0127	0.000387063	0.0801917	0.0990264	inflammasome
	ENSG00000163703.13	CRELD1	CRELD1	9,933,788 - 9,945,413	1.04616	2.86244	15.9566	0.000394566	0.0801917	0.0661011	Protein disulfide isomerase
	ENSG00000163923.5	RPL39L	RPL39L	187,120,948 - 187,139,523	0.938996	3.15726	10.6432	0.00278345	0.134172	0.0985871	60S ribosomal protein L39-like
	ENSG00000164440.10	TXLNB	TXLNB	139,159,162 - 139,324,029	1.80348	2.79117	22.8449	4.46607e-05	0.0422964	0.0346221	Beta-taxilin
	ENSG00000164442.8	CITED2	CITED2	139,372,255 - 139,374,650	1.30605	6.18354	20.8855	8.02584e-05	0.0461486	0.0404701	Transcriptional coactivator of the p300/CBP
	ENSG00000164687.6	FABP5	FABP5	81,280,483 - 81,284,777	1.05482	4.75889	13.4783	0.000947358	0.093412	0.0730641	Fatty acid-binding protein 5
	ENSG00000165046.8	LETM2	LETM2	38,382,505 - 38,409,527	1.32584	3.11039	12.799	0.00121682	0.101251	0.0921555	mitochondrial morphology
	ENSG00000166396.8	SERPINB7	SERPINB7	63,753,047 - 63,805,376	2.5492	-1.95003	16.2559	0.000356274	0.0801917	0.0805022	serine type endopeptidase
	ENSG00000167930.11	ITFG3	ITFG3	234,546 - 269,943	1.07239	1.44085	23.8476	3.33889e-05	0.0406636	0.0375085	integrin alpha FG-GAP repeat containing 3
	ENSG00000168310.6	IRF2	IRF2	184,382,741 - 184,474,580	0.850049	5.24992	13.7516	0.000857706	0.0933045	0.081211	Interferon Regulatory Factor 2, TF for Histone H4
	ENSG00000168906.8	MAT2A	MAT2A	85,538,978 - 85,545,280	0.882816	7.3239	18.9859	0.000145146	0.0607173	0.0645969	methionine adenosyltransferase 2A, generates SAM
	ENSG00000169252.4	ADRB2	ADRB2	148,826,593 - 148,828,634	1.37475	2.6135	15.1305	0.000525059	0.0801917	0.0730641	adrenoceptor beta 2
	ENSG00000169372.8	CRADD	CRADD	93,677,342 - 93,894,840	1.53977	6.56245	24.4122	2.84175e-05	0.0387248	0.0298004	CASP2 and RIPK1 domain
	ENSG00000170270.4	C14orf142	C14orf142	93,202,892 - 93,207,114	0.742906	2.65158	15.9221	0.000399256	0.0801917	0.0705835	KEOPS complex subunit GON7
	ENSG00000170345.5	FOS	FOS	75,278,778 - 75,282,234	1.20713	10.5224	12.8038	0.00121465	0.101251	0.0990264	FOS JUN AP-1 TF
	ENSG00000170448.7	NFXL1	NFXL1	47,847,233 - 47,914,667	0.677224	4.51877	10.5402	0.00289963	0.136201	0.0990264	zinc finger protein X-box binding
	ENSG00000171617.9	ENC1	ENC1	74,627,406 - 74,641,424	1.52643	4.92659	13.431	0.000963869	0.093412	0.081211	ectodermal-neural cortex 1
	ENSG00000173559.8	NABP1	NABP1	191,678,072 - 191,688,522	1.35221	4.64066	14.721	0.000606329	0.0813491	0.0746612	nucleic acid binding protein 1, ssDNA
	ENSG00000173566.9	NUDT18	NUDT18	22,106,872 - 22,110,355	1.01549	1.70001	21.6615	6.34472e-05	0.044413	0.0476996	8-oxo-dGDP phosphatase NUDT18, Purine catabolism
	ENSG00000173598.9	NUDT4	NUDT4	93,377,923 - 93,403,248	0.60142	6.93174	13.477	0.000947785	0.093412	0.081211	Diphosphoinositol polyphosphate phosphohydrolase 2
	ENSG00000176102.7	CSTF3	CSTF3	33,084,584 - 33,161,491	0.698623	5.03479	12.486	0.00136781	0.10786	0.0945897	Cleavage stimulation factor subunit 3
	ENSG00000177556.7	ATOX1	ATOX1	151,742,822 - 151,758,649	0.450491	4.47894	12.2904	0.00147231	0.109236	0.0964273	Copper transport protein
	ENSG00000177606.5	JUN	JUN	58,780,791 - 58,784,113	1.34108	9.13546	14.2688	0.000712013	0.0868441	0.0825107	heterodimers with FOS
	ENSG00000183662.6	FAM19A1	FAM19A1	67,991,592 - 68,546,056	3.71002	6.96392	15.8468	0.000409692	0.0801917	0.0718561	TAFA1 chemokine like protein
	ENSG00000183864.4	TOB2	TOB2	41,433,488 - 41,448,230	1.01304	5.61783	16.2375	0.000358505	0.0801917	0.0705835	transducer of ERBB2, cell cycle inhibitor. KMT2A partner
	ENSG00000183978.7	COA3	COA3	42,797,618 - 42,798,725	1.13454	2.45165	12.8582	0.00119034	0.101251	0.0921555	Hydroxymethylglutaryl-CoA synthase
	ENSG00000184156.11	KCNQ3	KCNQ3	132,120,858 - 132,480,757	2.07565	2.3359	11.5966	0.00191799	0.122049	0.0891693	Potassium voltage-gated channel subfamily
	ENSG00000184508.6	HDDC3	HDDC3	90,930,918 - 90,932,569	1.04884	1.60281	15.3807	0.000481237	0.0801917	0.0880322	Guanosine-3',5'-bis(diphosphate) 3'-pyrophosphohydrolase
	ENSG00000186834.2	HEXIM1	HEXIM1	45,147,317 - 45,152,101	1.23264	5.73714	14.9093	0.0005674	0.0801917	0.0678991	Transcriptional regulator; general RNA polymerase II transcription inhibitor
	ENSG00000196510.8	ANAPC7	ANAPC7	110,372,900 - 110,403,730	0.670807	4.07492	11.5582	0.00194656	0.122049	0.0990264	Anaphase-promoting complex,
	ENSG00000197238.3	HIST1H4J	HIST1H4J	27,824,125 - 27,824,480	1.50238	3.95023	14.1544	0.000741782	0.0878884	0.0985871	H4 clustered histone 11
	ENSG00000197451.6	HNRNPAB	HNRNPAB	178,204,507 - 178,211,183	0.768431	6.37181	18.9394	0.000147313	0.0607173	0.0537415	Heterogeneous nuclear ribonucleoprotein A/B
	ENSG00000232671.2	RP11-126K1.2	RP11-126K1.2	151252501-151254405	1.32967	2.30456	13.255	0.00102806	0.0964291	0.0870039	ZNF687 antisense RNA 1
	ENSG00000264364.2	DYNLL2	DYNLL2	58,083,419 - 58,090,257	0.629917	6.48132	14.7767	0.000594522	0.0804354	0.0730641	dynein light chain 2, cytoskeleton, cell division
	ENSG00000178149.12	DALRD3	DALRD3	49,015,399 - 49,021,251	1.03019	4.21907	17.2144	0.00025821	0.0789197	0.0730641	ND
	ENSG00000179564.3	LSMEM2	LSMEM2	50,277,907 - 50,288,116	3.47125	-2.18712	15.2276	0.000507565	0.0801917	0.0891693	ND
	ENSG00000181744.4	C3orf58	C3orf58	143,971,798 - 143,992,368	0.930925	6.42564	13.4311	0.000963844	0.093412	0.0954283	ND
	ENSG00000163683.7	SMIM14	SMIM14	39,547,297 - 39,638,998	0.983018	5.09447	17.0305	0.000274503	0.0789197	0.0678991	ND
	ENSG00000055147.13	FAM114A2	FAM114A2	153,990,131 - 154,038,938	0.891635	3.40167	14.0739	0.00076352	0.0890773	0.0774371	ND
	ENSG00000112183.10	RBM24	RBM24	17,281,508 - 17,293,875	3.06099	1.40898	15.2688	0.000500327	0.0801917	0.0817326	ND
	ENSG00000180425.7	C11orf71	C11orf71	114,391,448 - 114,400,550	0.587935	2.78163	13.7524	0.000857457	0.0933045	0.081211	ND
	ENSG00000174370.5	C11orf45	C11orf45	128,899,565 - 128,909,520	2.39709	-0.767411	19.1357	0.000138394	0.0607173	0.068069	ND
	ENSG00000084444.9	KIAA1467	KIAA1467	13,044,381 - 13,083,449	0.736165	4.86513	10.6913	0.00273095	0.134043	0.098667	ND
	ENSG00000226397.3	C12orf77	C12orf77	24,993,424 - 24,997,673	2.48178	0.467246	17.3556	0.000246409	0.0789197	0.0730641	ND
	ENSG00000257599.1	OVCH1	OVCH1	29,420,822 - 29,499,693	2.76908	2.56436	11.7676	0.00179607	0.120424	0.0985871	ND
	ENSG00000139438.5	FAM222A	FAM222A	109,713,835 - 109,770,509	1.68157	4.11761	13.5055	0.000938005	0.093412	0.0818811	ND
	ENSG00000185684.8	EP400NL	EP400NL	132,084,283 - 132,126,340	0.728616	2.89666	15.4693	0.000466665	0.0801917	0.0726163	ND
	ENSG00000256223.1	ZNF10	ZNF10	133,130,628 - 133,159,465	1.25064	0.515081	17.224	0.000257391	0.0789197	0.0730641	ND
	ENSG00000163138.14	PACRGL	PACRGL	20,696,282 - 20,754,828	0.819825	4.6104	12.7919	0.00122005	0.101251	0.0796662	ND
	ENSG00000063587.12	ZNF275	ZNF275	153,334,155 - 153,352,926	4.70756	-1.72824	15.0858	0.000533348	0.0801917	0.0919468	ND
Downregulated	ENSG00000041802.6	LSG1	LSG1	194,640,788 - 194,672,477	-0.57544	6.68613	13.068	0.00110136	0.0994662	0.0891693	Large subunit GTPase 1 homolog
	ENSG00000077254.10	USP33	USP33	77,695,987 - 77,759,879	-0.431237	7.15232	12.8308	0.00120254	0.101251	0.0921555	Ubiquitin carboxyl-terminal hydrolase 33
	ENSG00000081059.15	TCF7	TCF7	134,114,698 - 134,148,229	-1.43418	6.81207	13.9928	0.000786123	0.089763	0.0805599	Transcription factor 7, beta-catenin, WNT
	ENSG00000086475.10	SEPHS1	SEPHS1	13,317,428 - 13,348,298	-0.435829	5.58024	12.0769	0.00159622	0.112715	0.0985871	selenophosphate synthetase 1
	ENSG00000097033.10	SH3GLB1	SH3GLB1	86,704,570 - 86,748,184	-0.480909	7.21847	14.5123	0.00065284	0.084764	0.0774371	Endophilin-B1, Cell Death
	ENSG00000100422.9	CERK	CERK	46,684,410 - 46,738,255	-0.633741	6.88716	13.6916	0.00087656	0.093412	0.0817326	Ceramide kinase, glycosphingolipid metabolism
	ENSG00000100426.6	ZBED4	ZBED4	49,853,849 - 49,890,078	-0.546621	6.50344	13.0269	0.00111822	0.0994662	0.0891693	ZF
	ENSG00000100601.5	ALKBH1	ALKBH1	77,672,404 - 77,708,038	-0.664622	4.82294	12.2126	0.00151619	0.109875	0.0976649	Nucleic acid dioxygenase, nucleus and mitochondria
	ENSG00000101247.13	NDUFAF5	NDUFAF5	13,785,026 - 13,821,580	-0.743488	5.41742	27.4366	1.23421e-05	0.0262984	0.0119273	Arginine-hydroxylase, mitochondrial
	ENSG00000101343.10	CRNKL1	CRNKL1	20,034,361 - 20,056,046	-0.510265	5.74811	12.4592	0.00138163	0.10786	0.0954283	Crooked neck-like protein 1
	ENSG00000101400.5	SNTA1	SNTA1	33,407,957 - 33,443,892	-1.32323	2.64572	15.5414	0.000455165	0.0801917	0.0726163	Alpha-1-syntrophin, NO
	ENSG00000105323.12	HNRNPUL1	HNRNPUL1	41,262,476 - 41,307,783	-0.454588	7.87556	13.5747	0.000914616	0.093412	0.0807562	Heterogeneous nuclear ribonucleoprotein U-like protein 1
	ENSG00000105698.11	USF2	USF2	35,268,978 - 35,279,821	-0.569745	6.16668	12.3722	0.00142759	0.10786	0.0954283	Upstream stimulatory factor 2, TF
	ENSG00000106665.11	CLIP2	CLIP2	74,289,437 - 74,405,943	-1.20391	3.82827	12.5361	0.00134232	0.10786	0.0945998	microtubules to lamella
	ENSG00000106803.5	SEC61B	SEC61B	99,222,288 - 99,230,619	-0.549137	5.38595	14.852	0.000578953	0.0801917	0.0730641	Protein transport protein Sec61 subunit beta
	ENSG00000107560.6	RAB11FIP2	RAB11FIP2	118,004,916 - 118,046,921	-0.53798	7.21638	13.0364	0.00111429	0.0994662	0.0891693	RAB Protein Rho GTpAse, Actin
	ENSG00000109686.12	SH3D19	SH3D19	151,120,281 - 151,325,665	-1.67924	1.6535	14.8167	0.000586197	0.0801917	0.0881406	SH3 domain - EGFR, RAS activation, cytoskeletal organisation
	ENSG00000111711.5	GOLT1B	GOLT1B	21,501,176 - 21,518,403	-0.494478	5.32287	13.0278	0.00111784	0.0994662	0.0730641	Vesicle Transport, ER, NFKb, Golgi
	ENSG00000112592.8	TBP	TBP	170,554,333 - 170,572,870	-0.562974	5.29638	12.767	0.00123143	0.101672	0.0921555	TATA-box-binding protein
	ENSG00000113595.10	TRIM23	TRIM23	65,589,680 - 65,624,360	-0.518434	5.67678	13.8422	0.000830019	0.0915295	0.0796662	E3 Ubiquitin ligase - ER transport
	ENSG00000115525.12	ST3GAL5	ST3GAL5	85,839,133 - 85,889,034	-0.834696	5.85731	15.1587	0.000519914	0.0801917	0.0730641	formation of ganglioside GM3
	ENSG00000117289.7	TXNIP	TXNIP	145,992,426 - 145,996,631	-2.27295	4.31742	15.9502	0.00039542	0.0801917	0.0711103	Thioredoxin-interacting protein, glucose sensor
	ENSG00000117614.5	SYF2	SYF2	25,222,276 - 25,232,522	-0.517361	6.20784	13.5578	0.000920264	0.093412	0.0818811	Pre-mRNA-splicing factor
	ENSG00000119414.7	PPP6C	PPP6C	125,146,573 - 125,189,939	-0.510775	6.96646	11.9205	0.00169412	0.117062	0.098667	Serine/threonine-protein phosphatase 6
	ENSG00000124160.7	NCOA5	NCOA5	46,060,985 - 46,089,941	-0.526726	5.59318	15.1932	0.000513698	0.0801917	0.0661011	Nuclear receptor coactivator 5
	ENSG00000125484.7	GTF3C4	GTF3C4	132,670,035 - 132,694,955	-0.709815	4.86956	15.9275	0.000398514	0.0801917	0.0711103	General transcription factor 3C polypeptide 4
	ENSG00000127870.12	RNF6	RNF6	26,132,115 - 26,223,085	-0.536089	5.97773	12.503	0.00135908	0.10786	0.0945897	Ring Finger, E3 ubiquitin-protein ligase
	ENSG00000130734.5	ATG4D	ATG4D	10,543,894 - 10,553,423	-0.649996	5.39336	12.2569	0.00149105	0.109875	0.0774371	Cysteine protease, mitochondria, autophagy
	ENSG00000130985.12	UBA1	UBA1	47,190,800 - 47,215,128	-3.23617	-1.06886	20.2261	9.83081e-05	0.0527587	0.0661011	Ubiquitin-like modifier-activating enzyme
	ENSG00000132434.5	LANCL2	LANCL2	55,365,448 - 55,433,742	-0.823552	6.46523	13.3748	0.000983869	0.0942874	0.0838503	LanC-like
	ENSG00000132664.7	POLR3F	POLR3F	18,467,389 - 18,484,648	-0.653707	4.176	17.0585	0.000271948	0.0789197	0.0678991	DNA-directed RNA polymerase III subunit F
	ENSG00000134046.7	MBD2	MBD2	54,151,601 - 54,224,788	-0.465098	6.94558	12.5862	0.00131739	0.106583	0.0937824	Methyl-CpG-binding domain protein 2, NURD Complex
	ENSG00000134717.13	BTF3L4	BTF3L4	52,056,185 - 52,090,716	-0.475162	6.47104	14.8773	0.000573814	0.0801917	0.0730641	Transcription factor BTF3 homolog 4
	ENSG00000136146.10	MED4	MED4	48,075,728 - 48,095,141	-0.448165	6.16706	12.4147	0.00140496	0.10786	0.0921555	Mediator of RNA polymerase II transcription subunit 4
	ENSG00000136152.10	COG3	COG3	45,464,895 - 45,536,698	-0.413004	5.74887	10.0879	0.00347526	0.138152	0.0985871	Conserved oligomeric Golgi complex subunit 3
	ENSG00000136451.4	VEZF1	VEZF1	57,971,547 - 57,988,264	-0.557475	7.21089	12.0098	0.00163742	0.114123	0.0985871	Vascular endothelial zinc finger 1
	ENSG00000136738.10	STAM	STAM	17,644,125 - 17,716,824	-1.72596	3.93307	13.1426	0.00107147	0.0991154	0.0884042	Signal transducing adapter molecule, EGFR downreg, ESCRT
	ENSG00000137040.8	RANBP6	RANBP6	6,011,019 - 6,015,660	-0.578239	6.08608	10.55	0.00288835	0.136201	0.0945897	Ran-binding protein 6
	ENSG00000140564.6	FURIN	FURIN	90,868,592 - 90,883,458	-0.756641	5.83159	13.8879	0.000816429	0.091087	0.0805599	endoprotease, plasma membrane
	ENSG00000142867.8	BCL10	BCL10	85,265,776 - 85,276,904	-0.619691	5.23679	15.6752	0.000434602	0.0801917	0.0647532	Apoptosis, complex with MALT1, NFKb activator
	ENSG00000145919.6	BOD1	BOD1	173,607,145 - 173,617,072	-0.529976	4.96695	12.2318	0.00150524	0.109875	0.0818811	Biorientation of chromosomes in cell division protein 1
	ENSG00000146729.5	GBAS	GBAS	55,964,577 - 56,000,182	-0.596806	6.07185	16.0612	0.000380696	0.0801917	0.0711103	NipSnap homolog 2, mitochondria, OXPHOS
	ENSG00000148229.8	POLE3	POLE3	113,407,235 - 113,410,749	-0.63015	5.89092	12.3516	0.0014387	0.10786	0.0954283	DNA polymerase epsilon subunit 3
	ENSG00000148719.10	DNAJB12	DNAJB12	72,332,830 - 72,355,149	-0.531731	6.81757	11.8558	0.0017365	0.118464	0.0990264	DnaJ homolog subfamily B Heat Shock 40 member
	ENSG00000151576.6	QTRTD1	QTRTD1	114,056,735 - 114,088,422	-0.479424	5.52355	10.6664	0.00275797	0.134043	0.0923968	Queuine tRNA-ribosyltransferase
	ENSG00000154016.9	GRAP	GRAP	19,020,656 - 19,047,052	-1.1544	6.49414	19.2741	0.000132454	0.0607173	0.0484647	GRB2-related adapter protein, TK signalling
	ENSG00000157045.4	NTAN1	NTAN1	15,037,853 - 15,056,079	-0.634464	4.63941	12.4116	0.00140656	0.10786	0.0954283	N-terminal asparagine amidohydrolase
	ENSG00000158526.7	TSR2	TSR2	54,440,375 - 54,448,032	-0.563276	4.87146	11.867	0.00172905	0.118459	0.0990264	Pre-rRNA-processing protein, ribosome maturation,
	ENSG00000159592.6	GPBP1L1	GPBP1L1	45,627,304 - 45,688,110	-0.496992	7.59041	15.1394	0.00052343	0.0801917	0.0796662	Vasculin-like protein 1, TF
	ENSG00000159921.10	GNE	GNE	36,214,441 - 36,277,056	-0.619755	5.98441	16.7781	0.000298679	0.0801917	0.0678991	N-acetylmannosamine kinase, sialic acid
	ENSG00000160408.10	ST6GALNAC6	ST6GALNAC6	127,885,321 - 127,906,764	-0.615236	4.77914	12.4045	0.00141033	0.10786	0.0954283	alpha-2,6-sialyltransferase 6 ganglioside
	ENSG00000162419.8	GMEB1	GMEB1	28,668,728 - 28,715,603	-0.520216	5.12987	13.6038	0.000904992	0.093412	0.0817326	Glucocorticoid modulatory element-binding protein 1. TF
	ENSG00000162928.8	PEX13	PEX13	61,017,677 - 61,051,990	-0.496577	4.85305	13.1278	0.00107734	0.0991154	0.0884042	Peroxisomal membrane protein
	ENSG00000162971.6	TYW5	TYW5	199,928,911 - 199,955,736	-0.784685	4.87212	30.0117	6.29119e-06	0.0235427	0.0119273	tRNA wybutosine-synthesizing protein 5
	ENSG00000162972.6	C2orf47	C2orf47	199,955,317 - 199,964,125	-0.632891	5.87662	14.1626	0.000739606	0.0878884	0.0796662	MAIP1, mitochondrial
	ENSG00000164039.10	BDH2	BDH2	103,077,618 - 103,099,867	-0.861182	4.97353	20.5732	8.83205e-05	0.0490331	0.0368732	3-hydroxybutyrate dehydrogenase
	ENSG00000165716.5	FAM69B	FAM69B	136,712,572 - 136,724,718	-1.31586	6.58163	15.8574	0.000408213	0.0801917	0.0746612	Divergent protein kinase domain 1B
	ENSG00000166173.9	LARP6	LARP6	70,831,524 - 70,854,265	-3.97468	-1.65817	14.8424	0.000580919	0.0801917	0.0921555	La-related protein 6, stabilises mRNA
	ENSG00000168876.4	ANKRD49	ANKRD49	94,493,987 - 94,499,578	-0.538979	5.11706	12.0568	0.00160845	0.113083	0.0954283	Ankyrin repeat domain-
	ENSG00000169018.5	FEM1B	FEM1B	68,277,803 - 68,295,865	-0.598234	6.52469	21.8352	6.02268e-05	0.044413	0.0437047	E3 ubiquitin-protein ligase complex
	ENSG00000170364.8	SETMAR	SETMAR	4,303,304 - 4,320,649	-0.781751	4.182	27.2238	1.30675e-05	0.0262984	0.0202605	Histone-lysine N-methyltransferase
	ENSG00000170989.8	S1PR1	S1PR1	101,236,749 - 101,241,520	-1.37885	4.60856	15.0283	0.000544184	0.0801917	0.0693132	Sphingosine 1-phosphate receptor 1, activtes RAC1, MAPK, actin
	ENSG00000172409.5	CLP1	CLP1	57,657,744 - 57,661,865	-0.763173	3.50038	11.4962	0.00199371	0.122731	0.0990264	Polyribonucleotide 5'-hydroxyl-kinase
	ENSG00000172661.13	FAM21C	FAM21C	45,727,200 - 45,792,964	-0.545484	3.77581	15.4147	0.00047559	0.0801917	0.0726163	Arp2/3 complex WASH2C
	ENSG00000176142.8	TMEM39A	TMEM39A	119,428,960 - 119,463,682	-0.374267	5.84081	10.1553	0.00338221	0.138152	0.0985871	Transmembrane protein 39A
	ENSG00000176624.9	MEX3C	MEX3C	51,174,550 - 51,197,681	-0.743715	8.35467	13.6329	0.000895468	0.093412	0.0919468	RNA-binding E3 ubiquitin-protein ligase MEX3C
	ENSG00000177868.7	CCDC23	CCDC23	42,807,052 - 42,817,388	-0.541954	3.83054	15.2189	0.000509114	0.0801917	0.0726163	Small vasohibin-binding protein, alpha-tubulin
	ENSG00000180879.9	SSR4	SSR4	153,794,175 - 153,798,512	-2.41179	1.70414	21.4369	6.78863e-05	0.0455404	0.0537415	TRAP protein
	ENSG00000183475.8	ASB7	ASB7	100,602,550 - 100,651,701	-0.631881	4.73529	15.3434	0.000487511	0.0801917	0.068069	Ankyrin repeat with SOCS domain, E3 ubiquitin ligase, Neddylation
	ENSG00000185619.13	PCGF3	PCGF3	705,741 - 770,980	-0.7401	7.05608	12.3362	0.00144706	0.10786	0.0954283	Polycomb group RING finger protein 3
	ENSG00000186281.8	GPAT2	GPAT2	96,021,946 - 96,035,974	-4.35496	0.995113	22.0644	5.62443e-05	0.044413	0.0437047	Glycerol-3-phosphate acyltransferase 2, mitochondrial
	ENSG00000188647.8	PTAR1	PTAR1	69,709,522 - 69,760,050	-0.466475	7.48767	12.6481	0.00128723	0.1052	0.0990264	prenyltransferase alpha subunit repeat-containing protein 1
	ENSG00000189152.6	GRAPL	GRAPL	19,123,189 - 19,159,187	-1.15432	3.67016	15.9047	0.00040164	0.0801917	0.081211	GRB2-related adapter protein-like
	ENSG00000196705.4	ZNF431	ZNF431	21,142,009 - 21,196,053	-0.50536	6.49342	16.7155	0.00030503	0.0801917	0.068069	recruits HDAC1 and 2
	ENSG00000197223.7	C1D	C1D	68,042,200 - 68,063,027	-0.579035	5.46153	15.4848	0.000464165	0.0801917	0.0726163	Nuclear co repressor
	ENSG00000269531.1	AC073569.1	AC073569.1	79,773,563 - 79,935,764	-2.73848	-2.41652	14.3647	0.000688057	0.0861838	0.0990264	PPP1R12A, RHO GTPAse activity
	ENSG00000269808.1	AC010327.2	AC010327.2	55,226,634 - 55,229,264	-2.87539	-2.38477	18.8651	0.00015085	0.0607173	0.0818811	TMEM86B, lysoplasmalogenase
	ENSG00000269832.1	AL627171.2	AL627171.2	49,782,083 - 49,853,203	-2.5557	-2.3382	17.997	0.000199611	0.0744566	0.0726163	NEMF, Nuclear export mediator factor
	ENSG00000125945.10	ZNF436	ZNF436	23,359,448 - 23,369,864	-0.785817	3.23684	11.6923	0.00184873	0.121106	0.0884042	ND
	ENSG00000183726.6	TMEM50A	TMEM50A	25,664,408-25,688,852	-0.532997	5.74353	17.0827	0.000269766	0.0789197	0.0678991	ND
	ENSG00000114544.11	SLC41A3	SLC41A3	126,006,357 - 126,101,550	-0.545925	5.00192	14.5255	0.000649802	0.084764	0.0730641	ND
	ENSG00000213281.4	NRAS	NRAS	114,704,464 - 114,716,894	-0.583977	6.79102	15.5895	0.000447647	0.0801917	0.0726163
	ENSG00000141428.12	C18orf21	C18orf21	35,971,878 - 35,979,287	-0.71933	3.91811	15.9666	0.000393207	0.0801917	0.0711103	ND
	ENSG00000127081.9	ZNF484	ZNF484	92,844,195 - 92,878,060	-0.489703	4.81674	12.2027	0.00152187	0.109875	0.0964273	ND
	ENSG00000171448.8	ZBTB26	ZBTB26	122,918,029 - 122,931,551	-0.840828	4.40528	18.763	0.000155855	0.0612017	0.0437047	ND
	ENSG00000097007.13	ABL1	ABL1	130,713,881 - 130,887,675	-0.558766	6.53843	12.1397	0.00155865	0.111036	0.0954283
	ENSG00000172671.15	ZFAND4	ZFAND4	45,614,567 - 45,672,962	-0.648862	4.83617	15.4003	0.000477976	0.0801917	0.0726163	ND
	ENSG00000176371.9	ZSCAN2	ZSCAN2	84,601,018 - 84,623,718	-0.799032	4.21301	15.0895	0.000532658	0.0801917	0.0730641	ND
	ENSG00000268927.1	FLJ00418	FLJ00418	70,695,570-70,699,739	-3.15661	-1.42978	21.9688	5.78699e-05	0.044413	0.0502817	ND
	ENSG00000197566.5	ZNF624	ZNF624	16,620,734 - 16,655,210	-0.924327	4.16953	16.5822	0.000319026	0.0801917	0.068069	ND
	ENSG00000130803.10	ZNF317	ZNF317	9,140,380 - 9,163,419	-0.602383	6.54624	12.894	0.00117465	0.101251	0.0919468	ND
	ENSG00000171295.8	ZNF440	ZNF440	11,814,284 - 11,835,617	-0.655953	3.98239	14.0288	0.000775999	0.0892398	0.0774371	ND
	ENSG00000181896.7	ZNF101	ZNF101	19,668,070 - 19,683,506	-0.867291	4.51449	12.4987	0.00136131	0.10786	0.0945897	ND
	ENSG00000105708.8	ZNF14	ZNF14	19,710,472 - 19,733,112	-0.691777	5.85595	10.3978	0.00306893	0.137472	0.0954283	ND
	ENSG00000172687.9	ZNF738	ZNF738	21,358,930 - 21,388,582	-0.633227	5.94992	16.2653	0.000355133	0.0801917	0.0705835	ND
	ENSG00000229676.2	ZNF492	ZNF492	22,634,324 - 22,667,670	-0.985849	4.13309	14.9063	0.000568003	0.0801917	0.0730641	ND
	ENSG00000197372.5	ZNF675	ZNF675	23,708,433-23,870,022	-0.586335	5.97621	17.2167	0.000258012	0.0789197	0.0661011	ND
	ENSG00000188283.7	ZNF383	ZNF383	37,217,243 - 37,244,935	-0.683512	4.37412	22.3577	5.15516e-05	0.044413	0.0298004	ND
	ENSG00000167384.6	ZNF180	ZNF180	44,474,428 - 44,500,539	-0.748524	3.89308	17.938	0.000203484	0.0744566	0.063818	ND
	ENSG00000197619.9	ZNF615	ZNF615	51,991,332 - 52,008,230	-0.578999	4.28	14.5764	0.000638158	0.084216	0.0730641	ND
	ENSG00000196214.6	ZNF766	ZNF766	52,269,251 - 52,292,726	-0.557762	5.47906	16.3232	0.000348219	0.0801917	0.068069	ND
	ENSG00000213799.6	ZNF845	ZNF845	53,333,719 - 53,356,119	-0.688016	4.25308	13.8747	0.000820349	0.091087	0.0807562	ND
	ENSG00000083844.6	ZNF264	ZNF264	57,191,500 - 57,222,846	-0.765292	5.20671	21.1171	7.47903e-05	0.0461486	0.0404701	ND
	ENSG00000204524.5	ZNF805	ZNF805	57,240,685 - 57,262,738	-0.743505	4.10605	15.0784	0.000534724	0.0801917	0.0730641	ND
	ENSG00000083817.8	ZNF416	ZNF416	57,571,015 - 57,578,927	-0.819079	2.80209	14.4571	0.000665778	0.0857522	0.0774371	ND
	ENSG00000213762.6	ZNF134	ZNF134	57,614,219 - 57,624,717	-0.581543	5.54017	13.0889	0.00109291	0.0994117	0.0891693	ND
	ENSG00000121417.9	ZNF211	ZNF211	57,633,167 - 57,644,046	-0.593658	4.12351	15.7214	0.000427739	0.0801917	0.0726163	ND
	ENSG00000152443.8	ZNF776	ZNF776	57,746,796 - 57,758,159	-0.99608	5.06732	38.6163	8.11271e-07	0.0130615	0.00981796	ND

## Sheet: 6.2
Supplementary Table 6.2 89 differentially expressed genes based on log fold change (-1 to +1)
	genes	Genes	Length	logFC	logCPM	F	PValue	FDR	ihw.padj
Upregulated	ENSG00000111046.3	MYF6	1977	7.41704	0.185419	19.9644	0.000245945	0.0789197	0.0964273
	ENSG00000102466.11	FGF14	681991	5.48485	2.30839	30.9826	4.91859e-06	0.0235427	0.0119273
	ENSG00000063587.12	ZNF275	25956	4.70756	-1.72824	15.0858	0.000533348	0.0801917	0.0919468
	ENSG00000100867.10	DHRS2	15525	4.57993	-1.32335	19.2499	0.000133472	0.0607173	0.068069
	ENSG00000183662.6	FAM19A1	541418	3.71002	6.96392	15.8468	0.000409692	0.0801917	0.0718561
	ENSG00000179564.3	LSMEM2	9088	3.47125	-2.18712	15.2276	0.000507565	0.0801917	0.0891693
	ENSG00000112183.10	RBM24	12530	3.06099	1.40898	15.2688	0.000500327	0.0801917	0.0817326
	ENSG00000111181.8	SLC6A12	24494	2.8678	-1.47485	19.0332	0.000142976	0.0607173	0.068069
	ENSG00000142494.9	SLC47A1	83650	2.78213	1.30972	17.6749	0.000221789	0.0776263	0.0711103
	ENSG00000257599.1	OVCH1-AS1	98195	2.76908	2.56436	11.7676	0.00179607	0.120424	0.0985871
	ENSG00000077943.7	ITGA8	206177	2.74965	2.61484	15.5166	0.000459084	0.0801917	0.0726163
	ENSG00000104044.11	OCA2	344484	2.73432	2.89877	14.1252	0.000749589	0.0880904	0.0774371
	ENSG00000166396.8	SERPINB7	52436	2.5492	-1.95003	16.2559	0.000356274	0.0801917	0.0805022
	ENSG00000114487.5	MORC1	159904	2.54516	-0.0432221	16.2927	0.000351843	0.0801917	0.0803452
	ENSG00000124557.8	BTN1A1	9202	2.52145	-1.89883	13.9602	0.000795404	0.0901832	0.0990264
	ENSG00000226397.3	C12orf77	4096	2.48178	0.467246	17.3556	0.000246409	0.0789197	0.0730641
	ENSG00000163568.9	AIM2	84613	2.41916	2.22401	16.0127	0.000387063	0.0801917	0.0990264
	ENSG00000174370.5	C11orf45	6471	2.39709	-0.767411	19.1357	0.000138394	0.0607173	0.068069
	ENSG00000132688.10	NES	8635	2.34496	-2.35213	14.8092	0.00058774	0.0801917	0.0921555
	ENSG00000106211.8	HSPB1	1752	2.34463	6.22989	17.539	0.000231931	0.0789197	0.0661011
	ENSG00000143878.8	RHOB	2366	2.25642	8.90549	15.3795	0.000481433	0.0801917	0.0757284
	ENSG00000112186.7	CAP2	164577	2.16615	1.68446	21.1542	7.39523e-05	0.0461486	0.0502817
	ENSG00000081181.3	ARG2	31923	2.12994	3.45168	29.4269	7.31139e-06	0.0235427	0.0126403
	ENSG00000184156.11	KCNQ3	360093	2.07565	2.3359	11.5966	0.00191799	0.122049	0.0891693
	ENSG00000162772.12	ATF3	55444	1.91068	7.95594	25.1233	2.32549e-05	0.0387248	0.0298004
	ENSG00000124882.3	EREG	23609	1.87882	3.2861	12.6051	0.0013081	0.106365	0.0796662
	ENSG00000125740.9	FOSB	7185	1.86667	8.39378	30.5549	5.47901e-06	0.0235427	0.0119273
	ENSG00000100116.12	GCAT	9272	1.80582	3.25668	19.1834	0.000136313	0.0607173	0.0404701
	ENSG00000164440.10	TXLNB	52079	1.80348	2.79117	22.8449	4.46607e-05	0.0422964	0.0346221
	ENSG00000010319.2	SEMA3G	12033	1.79736	1.01277	13.5023	0.000939097	0.093412	0.098667
	ENSG00000139354.6	GAS2L3	54604	1.71557	5.62244	11.7888	0.00178158	0.120014	0.0985871
	ENSG00000139438.5	FAM222A	56280	1.68157	4.11761	13.5055	0.000938005	0.093412	0.0818811
	ENSG00000100095.14	SEZ6L	214123	1.66755	0.351809	19.3651	0.000128696	0.0607173	0.0803452
	ENSG00000145632.10	PLK2	6279	1.65089	5.76493	20.9962	7.75944e-05	0.0461486	0.0404701
	ENSG00000151491.8	EPS8	262172	1.64985	3.20095	28.1857	1.01119e-05	0.0262984	0.0119273
	ENSG00000145103.8	ILDR1	34882	1.64664	1.23702	16.675	0.000309205	0.0801917	0.0774371
	ENSG00000121039.5	RDH10	30670	1.63514	3.77797	12.8339	0.00120115	0.101251	0.0884899
	ENSG00000169372.8	CRADD	217466	1.53977	6.56245	24.4122	2.84175e-05	0.0387248	0.0298004
	ENSG00000171617.9	ENC1	14016	1.52643	4.92659	13.431	0.000963869	0.093412	0.081211
	ENSG00000197238.3	HIST1H4J	374	1.50238	3.95023	14.1544	0.000741782	0.0878884	0.0985871
	ENSG00000138311.11	ZNF365	297821	1.49105	1.2462	18.1133	0.000192196	0.0736753	0.0698384
	ENSG00000088986.6	DYNLL1	28644	1.41018	4.7913	24.3574	2.88632e-05	0.0387248	0.0298004
	ENSG00000169252.4	ADRB2	2041	1.37475	2.6135	15.1305	0.000525059	0.0801917	0.0730641
	ENSG00000173559.8	NABP1	18592	1.35221	4.64066	14.721	0.000606329	0.0813491	0.0746612
	ENSG00000072210.14	ALDH3A2	29463	1.34168	3.4155	11.6793	0.00185796	0.121106	0.098667
	ENSG00000159228.8	CBR1	3226	1.3412	2.35683	14.1572	0.000741034	0.0878884	0.0796662
	ENSG00000177606.5	JUN	3321	1.34108	9.13546	14.2688	0.000712013	0.0868441	0.0825107
	ENSG00000232671.2	RP11-126K1.2	1906	1.32967	2.30456	13.255	0.00102806	0.0964291	0.0870039
	ENSG00000165046.8	LETM2	23321	1.32584	3.11039	12.799	0.00121682	0.101251	0.0921555
	ENSG00000164442.8	CITED2	2365	1.30605	6.18354	20.8855	8.02584e-05	0.0461486	0.0404701
	ENSG00000050405.9	LIMA1	107759	1.27118	0.732627	15.4812	0.00046474	0.0801917	0.0807562
	ENSG00000256223.1	ZNF10	28891	1.25064	0.515081	17.224	0.000257391	0.0789197	0.0730641
	ENSG00000186834.2	HEXIM1	4785	1.23264	5.73714	14.9093	0.0005674	0.0801917	0.0678991
	ENSG00000108106.9	UBE2S	6494	1.22503	5.55829	23.3694	3.83287e-05	0.0406636	0.0316942
	ENSG00000010165.15	METTL13	32376	1.21889	2.73678	17.7311	0.000217737	0.0776263	0.0645969
	ENSG00000170345.5	FOS	3457	1.20713	10.5224	12.8038	0.00121465	0.101251	0.0990264
	ENSG00000141232.4	TOB1	5756	1.20589	5.22653	15.1408	0.000523188	0.0801917	0.0730641
	ENSG00000136997.10	MYC	5995	1.20012	5.212	13.4987	0.000940324	0.093412	0.0818811
	ENSG00000120129.5	DUSP1	3106	1.16229	9.08892	23.5853	3.60073e-05	0.0406636	0.0368732
	ENSG00000120694.15	HSPH1	25764	1.1484	5.91593	24.8436	2.51545e-05	0.0387248	0.0298004
	ENSG00000183978.7	COA3	3558	1.13454	2.45165	12.8582	0.00119034	0.101251	0.0921555
	ENSG00000068784.8	SRBD1	223486	1.13226	6.12436	11.7137	0.00183355	0.121106	0.098667
	ENSG00000137494.9	ANKRD42	66956	1.09864	3.90727	14.0303	0.000775587	0.0892398	0.098667
	ENSG00000136630.11	HLX	6703	1.07974	5.14006	15.1289	0.000525358	0.0801917	0.068069
	ENSG00000167930.11	ITFG3	35398	1.07239	1.44085	23.8476	3.33889e-05	0.0406636	0.0375085
	ENSG00000164687.6	FABP5	4415	1.05482	4.75889	13.4783	0.000947358	0.093412	0.0730641
	ENSG00000184508.6	HDDC3	1652	1.04884	1.60281	15.3807	0.000481237	0.0801917	0.0880322
	ENSG00000163703.13	CRELD1	11592	1.04616	2.86244	15.9566	0.000394566	0.0801917	0.0661011
	ENSG00000178149.12	DALRD3	6806	1.03019	4.21907	17.2144	0.00025821	0.0789197	0.0730641
	ENSG00000173566.9	NUDT18	2550	1.01549	1.70001	21.6615	6.34472e-05	0.044413	0.0476996
	ENSG00000183864.4	TOB2	13532	1.01304	5.61783	16.2375	0.000358505	0.0801917	0.0705835
Downregulated	genes	Genes	Length	logFC	logCPM	F	PValue	FDR	ihw.padj
	ENSG00000186281.8	GPAT2	17506	-4.35496	0.995113	22.0644	5.62443e-05	0.044413	0.0437047
	ENSG00000166173.9	LARP6	22636	-3.97468	-1.65817	14.8424	0.000580919	0.0801917	0.0921555
	ENSG00000130985.12	UBA1	24268	-3.23617	-1.06886	20.2261	9.83081e-05	0.0527587	0.0661011
	ENSG00000268927.1	FLJ00418	4170	-3.15661	-1.42978	21.9688	5.78699e-05	0.044413	0.0502817
	ENSG00000269808.1	AC010327.2	3061	-2.87539	-2.38477	18.8651	0.00015085	0.0607173	0.0818811
	ENSG00000269531.1	AC073569.1	3580	-2.73848	-2.41652	14.3647	0.000688057	0.0861838	0.0990264
	ENSG00000269832.1	AL627171.2	1266	-2.5557	-2.3382	17.997	0.000199611	0.0744566	0.0726163
	ENSG00000180879.9	SSR4	4990	-2.41179	1.70414	21.4369	6.78863e-05	0.0455404	0.0537415
	ENSG00000117289.7	TXNIP	4167	-2.27295	4.31742	15.9502	0.00039542	0.0801917	0.0711103
	ENSG00000136738.10	STAM	71790	-1.72596	3.93307	13.1426	0.00107147	0.0991154	0.0884042
	ENSG00000109686.12	SH3D19	222882	-1.67924	1.6535	14.8167	0.000586197	0.0801917	0.0881406
	ENSG00000081059.15	TCF7	37155	-1.43418	6.81207	13.9928	0.000786123	0.089763	0.0805599
	ENSG00000170989.8	S1PR1	4631	-1.37885	4.60856	15.0283	0.000544184	0.0801917	0.0693132
	ENSG00000101400.5	SNTA1	35938	-1.32323	2.64572	15.5414	0.000455165	0.0801917	0.0726163
	ENSG00000165716.5	FAM69B	11481	-1.31586	6.58163	15.8574	0.000408213	0.0801917	0.0746612
	ENSG00000106665.11	CLIP2	116469	-1.20391	3.82827	12.5361	0.00134232	0.10786	0.0945998
	ENSG00000154016.9	GRAP	26965	-1.1544	6.49414	19.2741	0.000132454	0.0607173	0.0484647
	ENSG00000189152.6	GRAPL	31708	-1.15432	3.67016	15.9047	0.00040164	0.0801917	0.081211
Genes	Mapped status to uniprot
AC010327.2	Not Mapped
AC073569.1	Not Mapped
AL627171.2	Not Mapped
OVCH1-AS1	Not Mapped
RP11-126K1.2	Not Mapped
