# Supplementary material for: Unique mutation and gene expression in High Hyperdiploid Acute Lymphoblastic Leukaemia with whole chromosome uniparental isodisomy
Source: Research Square preprint supplement (doi:10.21203/rs.3.rs-1349722/v1), 2022-02-16
Supplement: Supplementary file 9 [file 206339743adbbbcd0416c2f3.xlsx]

## Sheet: UPD-Raw values
1	UPN13				B2M					GAPDH
Target Name	CT-rep1	CT-rep2	CT-rep3	Ct Mean	CT-rep1	CT-rep2	CT-rep3	Ct Mean	∆Ct	CT-rep1	CT-rep2	CT-rep3	Ct Mean	∆Ct
ATF3	24.7388	24.6929	24.6879	24.7065	16.0702	16.0196	16.0587	16.0495	8.65703	15.8883	15.9767	15.9027	15.9226	8.78395
FOSB	22.134	22.1516	22.2017	22.1624	16.0702	16.0196	16.0587	16.0495	6.11293	15.8883	15.9767	15.9027	15.9226	6.23985
HIST1H4J	18.3035	18.2672	18.162	18.2442	16.0702	16.0196	16.0587	16.0495	2.19475	15.8883	15.9767	15.9027	15.9226	2.32167
PLK2	24.6016	24.448	24.5153	24.5216	16.0702	16.0196	16.0587	16.0495	8.47217	15.8883	15.9767	15.9027	15.9226	8.59908
TXNIP	17.0603	17.0491	17.0179	17.0425	16.0702	16.0196	16.0587	16.0495	0.99298	15.8883	15.9767	15.9027	15.9226	1.1199
MYC	28.1614	27.9981	27.9772	28.0456	16.0702	16.0196	16.0587	16.0495	11.9961	15.8883	15.9767	15.9027	15.9226	12.123
JUN	18.1719	18.1288	18.1214	18.1407	16.0702	16.0196	16.0587	16.0495	2.09123	15.8883	15.9767	15.9027	15.9226	2.21814
FOS	16.3851	16.3046	16.2698	16.3198	16.0702	16.0196	16.0587	16.0495	0.270346	15.8883	15.9767	15.9027	15.9226	0.397264
CCNB1	23.3428	23.3341	23.2249	23.3006	16.0702	16.0196	16.0587	16.0495	7.25114	15.8883	15.9767	15.9027	15.9226	7.37806
CDC20	23.1839	23.1879	23.0602	23.144	16.0702	16.0196	16.0587	16.0495	7.09454	15.8883	15.9767	15.9027	15.9226	7.22146
ABL1	24.8033	24.8157	24.8323	24.8171	16.0702	16.0196	16.0587	16.0495	8.76761	15.8883	15.9767	15.9027	15.9226	8.89453
NRAS	19.732	19.6859	19.7195	19.7125	16.0702	16.0196	16.0587	16.0495	3.66298	15.8883	15.9767	15.9027	15.9226	3.7899
NUDT15	23.1294	24.3317	23.1014	23.5208	16.0702	16.0196	16.0587	16.0495	7.47134	15.8883	15.9767	15.9027	15.9226	7.59825
NUDT18	32.8215	32.4951	32.9756	32.7641	16.0702	16.0196	16.0587	16.0495	16.7146	15.8883	15.9767	15.9027	15.9226	16.8415
NUDT4	23.3839	23.4165	23.4377	23.4127	16.0702	16.0196	16.0587	16.0495	7.36323	15.8883	15.9767	15.9027	15.9226	7.49015
RAC2	19.092	19.1271	19.1657	19.1283	16.0702	16.0196	16.0587	16.0495	3.07877	15.8883	15.9767	15.9027	15.9226	3.20569
2	UPN28				B2M					GAPDH
Target Name	CT-rep1	CT-rep2	CT-rep3	Ct Mean	CT-rep1	CT-rep2	CT-rep3	Ct Mean	∆Ct	CT-rep1	CT-rep2	CT-rep3	Ct Mean	∆Ct
ATF3	23.2506	23.1711	23.1285	23.1834	16.8932	16.8581	16.975	16.9088	6.27463	17.2875	17.3639	17.3572	17.3362	5.84721
FOSB	20.9838	20.9813	21.0544	21.0065	16.8932	16.8581	16.975	16.9088	4.09773	17.2875	17.3639	17.3572	17.3362	3.67031
HIST1H4J	20.0607	20.0163	20.0658	20.0476	16.8932	16.8581	16.975	16.9088	3.13882	17.2875	17.3639	17.3572	17.3362	2.7114
PLK2	23.984	23.9137	23.87	23.9226	16.8932	16.8581	16.975	16.9088	7.01378	17.2875	17.3639	17.3572	17.3362	6.58636
TXNIP	19.5431	19.7008	19.5038	19.5826	16.8932	16.8581	16.975	16.9088	2.67381	17.2875	17.3639	17.3572	17.3362	2.24639
MYC	25.1549	25.0335	25.0862	25.0915	16.8932	16.8581	16.975	16.9088	8.18276	17.2875	17.3639	17.3572	17.3362	7.75534
JUN	17.7979	17.7452	17.7474	17.7635	16.8932	16.8581	16.975	16.9088	0.854713	17.2875	17.3639	17.3572	17.3362	0.427293
FOS	16.7726	16.7025	16.7032	16.7261	16.8932	16.8581	16.975	16.9088	-0.182673	17.2875	17.3639	17.3572	17.3362	-0.610093
CCNB1	23.8947	23.7795	23.7401	23.8048	16.8932	16.8581	16.975	16.9088	6.89599	17.2875	17.3639	17.3572	17.3362	6.46857
CDC20	24.2016	24.1893	24.2416	24.2108	16.8932	16.8581	16.975	16.9088	7.30204	17.2875	17.3639	17.3572	17.3362	6.87462
ABL1	24.949	24.9259	24.9735	24.9494	16.8932	16.8581	16.975	16.9088	8.04066	17.2875	17.3639	17.3572	17.3362	7.61324
NRAS	20.9082	20.8589	20.933	20.9	16.8932	16.8581	16.975	16.9088	3.99127	17.2875	17.3639	17.3572	17.3362	3.56385
NUDT15	25.4673	25.4986	25.4814	25.4824	16.8932	16.8581	16.975	16.9088	8.57364	17.2875	17.3639	17.3572	17.3362	8.14622
NUDT18	34.0095	34.3449	33.2027	33.8523	16.8932	16.8581	16.975	16.9088	16.9436	17.2875	17.3639	17.3572	17.3362	16.5161
NUDT4	24.0653	23.9316	23.9812	23.9927	16.8932	16.8581	16.975	16.9088	7.08396	17.2875	17.3639	17.3572	17.3362	6.65654
RAC2	21.3874	21.4666	21.5318	21.4619	16.8932	16.8581	16.975	16.9088	4.55314	17.2875	17.3639	17.3572	17.3362	4.12572
3	UPN56				B2M					GAPDH
Target Name	CT-rep1	CT-rep2	CT-rep3	Ct Mean	CT-rep1	CT-rep2	CT-rep3	Ct Mean	∆Ct	CT-rep1	CT-rep2	CT-rep3	Ct Mean	∆Ct
ATF3	26.2146	26.1514	26.0293	26.1318	17.3254	17.0757	17.0833	17.1615	8.97029	16.9128	17.0091	16.5185	16.8135	9.31827
FOSB	22.2157	22.2245	22.2522	22.2308	17.3254	17.0757	17.0833	17.1615	5.06932	16.9128	17.0091	16.5185	16.8135	5.4173
HIST1H4J	20.6336	20.5624	20.5771	20.591	17.3254	17.0757	17.0833	17.1615	3.42956	16.9128	17.0091	16.5185	16.8135	3.77754
PLK2	24.8393	24.8138	24.8076	24.8202	17.3254	17.0757	17.0833	17.1615	7.65876	16.9128	17.0091	16.5185	16.8135	8.00673
TXNIP	19.2149	19.1932	19.1406	19.1829	17.3254	17.0757	17.0833	17.1615	2.02146	16.9128	17.0091	16.5185	16.8135	2.36943
MYC	26.991	26.8392	26.8947	26.9083	17.3254	17.0757	17.0833	17.1615	9.74681	16.9128	17.0091	16.5185	16.8135	10.0948
JUN	20.0422	20.0272	19.9755	20.015	17.3254	17.0757	17.0833	17.1615	2.85351	16.9128	17.0091	16.5185	16.8135	3.20148
FOS	18.8894	18.328	18.3606	18.526	17.3254	17.0757	17.0833	17.1615	1.36454	16.9128	17.0091	16.5185	16.8135	1.71252
CCNB1	23.8698	23.8429	23.7805	23.8311	17.3254	17.0757	17.0833	17.1615	6.66962	16.9128	17.0091	16.5185	16.8135	7.0176
CDC20	23.1735	23.2419	23.1717	23.1957	17.3254	17.0757	17.0833	17.1615	6.03424	16.9128	17.0091	16.5185	16.8135	6.38222
ABL1	25.4776	25.2307	25.175	25.2944	17.3254	17.0757	17.0833	17.1615	8.13296	16.9128	17.0091	16.5185	16.8135	8.48093
NRAS	21.0546	21.0178	20.9723	21.0149	17.3254	17.0757	17.0833	17.1615	3.85344	16.9128	17.0091	16.5185	16.8135	4.20141
NUDT15	25.0759	24.9079	24.9226	24.9688	17.3254	17.0757	17.0833	17.1615	7.80735	16.9128	17.0091	16.5185	16.8135	8.15532
NUDT18	32.4795	32.1528	32.346	32.3261	17.3254	17.0757	17.0833	17.1615	15.1646	16.9128	17.0091	16.5185	16.8135	15.5126
NUDT4	23.3188	23.3392	23.3713	23.3431	17.3254	17.0757	17.0833	17.1615	6.18163	16.9128	17.0091	16.5185	16.8135	6.5296
RAC2	19.7369	19.592	19.6842	19.671	17.3254	17.0757	17.0833	17.1615	2.50957	16.9128	17.0091	16.5185	16.8135	2.85754
4	UPN23				B2M					GAPDH
Target Name	CT-rep1	CT-rep2	CT-rep3	Ct Mean	CT-rep1	CT-rep2	CT-rep3	Ct Mean	∆Ct	CT-rep1	CT-rep2	CT-rep3	Ct Mean	∆Ct
ATF3	26.5881	26.252	26.279	26.373	17.6545	17.6377	17.745	17.6791	8.69395	17.1617	17.223	17.1957	17.1935	9.17954
FOSB	24.5036	24.3576	24.3719	24.411	17.6545	17.6377	17.745	17.6791	6.73194	17.1617	17.223	17.1957	17.1935	7.21753
HIST1H4J	20.6041	20.5463	20.5479	20.5661	17.6545	17.6377	17.745	17.6791	2.88703	17.1617	17.223	17.1957	17.1935	3.37262
PLK2	28.2132	28.1488	28.1208	28.1609	17.6545	17.6377	17.745	17.6791	10.4818	17.1617	17.223	17.1957	17.1935	10.9674
TXNIP	20.5902	20.398	20.4898	20.4927	17.6545	17.6377	17.745	17.6791	2.81359	17.1617	17.223	17.1957	17.1935	3.29918
MYC	30.4161	30.0853	30.034	30.1785	17.6545	17.6377	17.745	17.6791	12.4994	17.1617	17.223	17.1957	17.1935	12.985
JUN	20.5343	20.4164	20.378	20.4429	17.6545	17.6377	17.745	17.6791	2.7638	17.1617	17.223	17.1957	17.1935	3.24939
FOS	18.5591	18.4829	18.4468	18.4963	17.6545	17.6377	17.745	17.6791	0.817203	17.1617	17.223	17.1957	17.1935	1.30279
CCNB1	24.4947	24.3538	24.3612	24.4032	17.6545	17.6377	17.745	17.6791	6.72414	17.1617	17.223	17.1957	17.1935	7.20973
CDC20	24.9659	24.9792	24.9486	24.9646	17.6545	17.6377	17.745	17.6791	7.2855	17.1617	17.223	17.1957	17.1935	7.77109
ABL1	26.0009	25.9636	26.0457	26.0034	17.6545	17.6377	17.745	17.6791	8.32435	17.1617	17.223	17.1957	17.1935	8.80994
NRAS	22.281	22.2407	22.3577	22.2931	17.6545	17.6377	17.745	17.6791	4.61407	17.1617	17.223	17.1957	17.1935	5.09966
NUDT15	26.0683	25.9976	25.9998	26.0219	17.6545	17.6377	17.745	17.6791	8.34283	17.1617	17.223	17.1957	17.1935	8.82842
NUDT18	34.1806	35.0309	37.008	35.4065	17.6545	17.6377	17.745	17.6791	17.7274	17.1617	17.223	17.1957	17.1935	18.213
NUDT4	25.7056	25.724	25.6632	25.6976	17.6545	17.6377	17.745	17.6791	8.01851	17.1617	17.223	17.1957	17.1935	8.5041
RAC2	22.304	22.2132	22.3242	22.2805	17.6545	17.6377	17.745	17.6791	4.6014	17.1617	17.223	17.1957	17.1935	5.08699
5	UPN24				B2M					GAPDH
Target Name	CT-rep1	CT-rep2	CT-rep3	Ct Mean	CT-rep1	CT-rep2	CT-rep3	Ct Mean	∆Ct	CT-rep1	CT-rep2	CT-rep3	Ct Mean	∆Ct
ATF3	25.8369	25.7555	25.7551	25.7825	17.1315	17.0996	17.2597	17.1636	8.61891	17.0875	17.157	17.145	17.1298	8.65266
FOSB	23.2288	23.2493	23.2101	23.2294	17.1315	17.0996	17.2597	17.1636	6.06582	17.0875	17.157	17.145	17.1298	6.09957
HIST1H4J	20.3212	20.2824	20.3205	20.3081	17.1315	17.0996	17.2597	17.1636	3.14447	17.0875	17.157	17.145	17.1298	3.17823
PLK2	25.0909	25.1009	24.9677	25.0532	17.1315	17.0996	17.2597	17.1636	7.88958	17.0875	17.157	17.145	17.1298	7.92333
TXNIP	18.1537	18.0832	18.1743	18.1371	17.1315	17.0996	17.2597	17.1636	0.973499	17.0875	17.157	17.145	17.1298	1.00725
MYC	29.6316	29.58	29.5319	29.5812	17.1315	17.0996	17.2597	17.1636	12.4176	17.0875	17.157	17.145	17.1298	12.4513
JUN	18.94	18.87	18.85	18.8867	17.1315	17.0996	17.2597	17.1636	1.72308	17.0875	17.157	17.145	17.1298	1.75684
FOS	16.2044	15.9999	15.9901	16.0648	17.1315	17.0996	17.2597	17.1636	-1.0988	17.0875	17.157	17.145	17.1298	-1.06505
CCNB1	24.2911	24.2205	24.2415	24.251	17.1315	17.0996	17.2597	17.1636	7.08746	17.0875	17.157	17.145	17.1298	7.12121
CDC20	24.8218	24.7902	24.828	24.8133	17.1315	17.0996	17.2597	17.1636	7.64976	17.0875	17.157	17.145	17.1298	7.68351
ABL1	25.5551	25.587	25.6919	25.6113	17.1315	17.0996	17.2597	17.1636	8.44775	17.0875	17.157	17.145	17.1298	8.4815
NRAS	21.0892	20.9826	21.0944	21.0554	17.1315	17.0996	17.2597	17.1636	3.89181	17.0875	17.157	17.145	17.1298	3.92556
NUDT15	25.2424	25.2101	25.2838	25.2454	17.1315	17.0996	17.2597	17.1636	8.08186	17.0875	17.157	17.145	17.1298	8.11561
NUDT18	33.4466	33.4482	33.0195	33.3047	17.1315	17.0996	17.2597	17.1636	16.1412	17.0875	17.157	17.145	17.1298	16.1749
NUDT4	25.5176	25.5389	25.5247	25.5271	17.1315	17.0996	17.2597	17.1636	8.36349	17.0875	17.157	17.145	17.1298	8.39724
RAC2	20.9685	20.9996	21.0983	21.0221	17.1315	17.0996	17.2597	17.1636	3.85853	17.0875	17.157	17.145	17.1298	3.89229
11	UPN11				B2M
Target Name	CT-rep1	CT-rep2	CT-rep3	Ct Mean	CT-rep1	CT-rep2	CT-rep3	Ct Mean	∆Ct
ATF3	24.1644	24.1455	24.2907	24.2002	16.0882	15.9373	16.0535	16.0263	8.17391
FOSB	21.2329	21.1876	21.1945	21.205	16.0882	15.9373	16.0535	16.0263	5.17871
HIST1H4J	19.7274	19.6392	19.6932	19.6866	16.0882	15.9373	16.0535	16.0263	3.66031
PLK2	25.0176	25.0779	25.0942	25.0632	16.0882	15.9373	16.0535	16.0263	9.03689
TXNIP	19.6441	19.6196	19.6212	19.6283	16.0882	15.9373	16.0535	16.0263	3.60197
MYC	27.7036	27.5402	27.6057	27.6165	16.0882	15.9373	16.0535	16.0263	11.5902
JUN	18.4161	18.0766	18.038	18.1769	16.0882	15.9373	16.0535	16.0263	2.15061
FOS	16.2563	16.1802	16.1275	16.188	16.0882	15.9373	16.0535	16.0263	0.161692
CCNB1	25.8765	25.8188	25.7446	25.8133	16.0882	15.9373	16.0535	16.0263	9.78697
CDC20	26.3988	26.4059	26.2545	26.3531	16.0882	15.9373	16.0535	16.0263	10.3268
ABL1	25.325	25.4131	25.3428	25.3603	16.0882	15.9373	16.0535	16.0263	9.33398
NRAS	20.6172	20.5058	20.5985	20.5738	16.0882	15.9373	16.0535	16.0263	4.54752
NUDT15	24.6564	24.6109	24.5845	24.6173	16.0882	15.9373	16.0535	16.0263	8.59095
NUDT18	32.1105	31.9376	31.9556	32.0013	16.0882	15.9373	16.0535	16.0263	15.9749
NUDT4	24.5512	24.5274	24.464	24.5142	16.0882	15.9373	16.0535	16.0263	8.48789
RAC2	20.7923	20.8584	20.8514	20.834	16.0882	15.9373	16.0535	16.0263	4.80772
12	UPN12				B2M
Target Name	CT-rep1	CT-rep2	CT-rep3	Ct Mean	CT-rep1	CT-rep2	CT-rep3	Ct Mean	∆Ct
ATF3	24.4733	24.4776	24.3933	24.4481	16.667	16.5796	16.6839	16.6435	7.8046
FOSB	22.9492	22.8881	22.6495	22.829	16.667	16.5796	16.6839	16.6435	6.18547
HIST1H4J	19.3655	19.3922	19.3949	19.3842	16.667	16.5796	16.6839	16.6435	2.74069
PLK2	24.7721	24.7144	24.7468	24.7444	16.667	16.5796	16.6839	16.6435	8.10094
TXNIP	21.1597	21.2708	21.2516	21.2274	16.667	16.5796	16.6839	16.6435	4.58388
MYC	29.8838	29.7079	29.1978	29.5965	16.667	16.5796	16.6839	16.6435	12.953
JUN	20.228	20.125	20.0633	20.1388	16.667	16.5796	16.6839	16.6435	3.49526
FOS	17.2801	17.2174	17.1873	17.2282	16.667	16.5796	16.6839	16.6435	0.584752
CCNB1	25.6551	25.538	25.5706	25.5879	16.667	16.5796	16.6839	16.6435	8.94439
CDC20	26.7571	25.3276	24.9601	25.6816	16.667	16.5796	16.6839	16.6435	9.03812
ABL1	25.2397	25.2559	25.2841	25.2599	16.667	16.5796	16.6839	16.6435	8.6164
NRAS	20.7885	20.7994	20.8452	20.811	16.667	16.5796	16.6839	16.6435	4.16752
NUDT15	25.2581	25.1949	25.2473	25.2334	16.667	16.5796	16.6839	16.6435	8.58993
NUDT18	31.1834	31.2431	31.3671	31.2645	16.667	16.5796	16.6839	16.6435	14.621
NUDT4	24.9835	25.3282	24.5189	24.9435	16.667	16.5796	16.6839	16.6435	8.30005
RAC2	17.3569	17.3213	17.3382	17.3388	16.667	16.5796	16.6839	16.6435	0.695275
13	UPN25				B2M
Target Name	CT-rep1	CT-rep2	CT-rep3	Ct Mean	CT-rep1	CT-rep2	CT-rep3	Ct Mean	∆Ct
ATF3	23.2074	23.1486	23.2884	23.2148	18.6688	18.6749	18.428	18.5906	4.62425
FOSB	21.6616	21.6336	21.659	21.6514	18.6688	18.6749	18.428	18.5906	3.06081
HIST1H4J	20.4603	20.4425	20.3336	20.4121	18.6688	18.6749	18.428	18.5906	1.82155
PLK2	25.0314	24.9779	25.0367	25.0153	18.6688	18.6749	18.428	18.5906	6.42477
TXNIP	21.128	21.0486	20.9015	21.026	18.6688	18.6749	18.428	18.5906	2.43546
MYC	30.1212	30.023	30.0091	30.0511	18.6688	18.6749	18.428	18.5906	11.4605
JUN	20.0049	20.1351	18.8981	19.6794	18.6688	18.6749	18.428	18.5906	1.08881
FOS	17.3937	17.3517	16.5481	17.0978	18.6688	18.6749	18.428	18.5906	-1.49275
CCNB1	27.4353	26.6455	24.7531	26.2779	18.6688	18.6749	18.428	18.5906	7.68738
CDC20	26.8697	26.3106	24.8938	26.0247	18.6688	18.6749	18.428	18.5906	7.43415
ABL1	27.8101	27.8775	26.2222	27.3033	18.6688	18.6749	18.428	18.5906	8.7127
NRAS	23.2887	22.2795	21.3616	22.31	18.6688	18.6749	18.428	18.5906	3.7194
NUDT15	26.1908	26.1168	26.1597	26.1557	18.6688	18.6749	18.428	18.5906	7.56519
NUDT18	35.0316	34.7993	34.1411	34.6573	18.6688	18.6749	18.428	18.5906	16.0668
NUDT4	25.5796	25.5947	25.5576	25.5773	18.6688	18.6749	18.428	18.5906	6.98674
RAC2	22.0621	22.1451	22.1766	22.1279	18.6688	18.6749	18.428	18.5906	3.53736
14	UPN54				B2M
Target Name	CT-rep1	CT-rep2	CT-rep3	Ct Mean	CT-rep1	CT-rep2	CT-rep3	Ct Mean	∆Ct
ATF3	27.3408	27.4347	27.2815	27.3523	17.8717	17.4932	16.6882	17.351	10.0013
FOSB	24.9033	24.8325	24.8232	24.853	17.8717	17.4932	16.6882	17.351	7.50194
HIST1H4J	18.9999	18.9592	18.7793	18.9128	17.8717	17.4932	16.6882	17.351	1.56173
PLK2	26.3231	26.1826	25.8511	26.1189	17.8717	17.4932	16.6882	17.351	8.76787
TXNIP	19.7903	19.7753	19.7202	19.762	17.8717	17.4932	16.6882	17.351	2.41092
MYC	27.4328	27.3356	27.3225	27.3637	17.8717	17.4932	16.6882	17.351	10.0126
JUN	20.9427	20.826	20.8234	20.8641	17.8717	17.4932	16.6882	17.351	3.51301
FOS	20.2186	20.1531	20.1526	20.1748	17.8717	17.4932	16.6882	17.351	2.82372
CCNB1	26.1357	25.8964	24.5751	25.5357	17.8717	17.4932	16.6882	17.351	8.18468
CDC20	23.8834	23.8492	23.8433	23.8586	17.8717	17.4932	16.6882	17.351	6.50758
ABL1	25.1987	25.3132	25.233	25.2483	17.8717	17.4932	16.6882	17.351	7.89724
NRAS	20.6053	20.6122	20.5682	20.5952	17.8717	17.4932	16.6882	17.351	3.24417
NUDT15	25.6512	25.6165	25.2263	25.498	17.8717	17.4932	16.6882	17.351	8.14692
NUDT18	32.6597	32.3053	30.8893	31.9514	17.8717	17.4932	16.6882	17.351	14.6004
NUDT4	26.4573	26.7243	25.08	26.0872	17.8717	17.4932	16.6882	17.351	8.73616
RAC2	21.1387	21.2595	20.0134	20.8038	17.8717	17.4932	16.6882	17.351	3.45278
15	UPN44				B2M
Target Name	CT-rep1	CT-rep2	CT-rep3	Ct Mean	CT-rep1	CT-rep2	CT-rep3	Ct Mean	∆Ct
ATF3	22.8528	22.7861	22.8126	22.8172	16.6564	16.5927	16.705	16.6514	6.16581
FOSB	21.3256	21.1984	21.1076	21.2105	16.6564	16.5927	16.705	16.6514	4.55917
HIST1H4J	20.3023	20.2763	20.2509	20.2765	16.6564	16.5927	16.705	16.6514	3.62518
PLK2	24.9382	25.4384	24.2956	24.8907	16.6564	16.5927	16.705	16.6514	8.23937
TXNIP	18.9798	18.9488	18.9272	18.9519	16.6564	16.5927	16.705	16.6514	2.30057
MYC	28.9073	28.7502	28.8386	28.832	16.6564	16.5927	16.705	16.6514	12.1807
JUN	17.5987	17.5281	17.4968	17.5412	16.6564	16.5927	16.705	16.6514	0.889846
FOS	16.3605	16.2482	16.2503	16.2863	16.6564	16.5927	16.705	16.6514	-0.365033
CCNB1	24.3755	24.2753	23.9798	24.2102	16.6564	16.5927	16.705	16.6514	7.55886
CDC20	24.5089	24.4799	24.4345	24.4744	16.6564	16.5927	16.705	16.6514	7.8231
ABL1	24.9728	25.0102	24.9849	24.9893	16.6564	16.5927	16.705	16.6514	8.33794
NRAS	20.6055	20.6315	20.6142	20.6171	16.6564	16.5927	16.705	16.6514	3.96571
NUDT15	24.8246	24.8641	24.727	24.8052	16.6564	16.5927	16.705	16.6514	8.15388
NUDT18	33.1794	32.9091	32.7881	32.9589	16.6564	16.5927	16.705	16.6514	16.3075
NUDT4	24.9657	25.0246	24.9752	24.9885	16.6564	16.5927	16.705	16.6514	8.33712
RAC2	20.5275	20.6267	20.5948	20.583	16.6564	16.5927	16.705	16.6514	3.93167

## Sheet: NUPD-Raw values
6	UPN8				B2M					GAPDH
Target Name	CT-rep1	CT-rep2	CT-rep3	Ct Mean	CT-rep1	CT-rep2	CT-rep3	Ct Mean	∆Ct	CT-rep1	CT-rep2	CT-rep3	Ct Mean	∆Ct
ATF3	25.8811	25.9511	25.8466	25.8929	15.316	15.2295	15.2859	15.2771	10.6158	16.5676	16.6661	16.6194	16.6177	9.27521
FOSB	26.2994	26.3169	26.3638	26.3267	15.316	15.2295	15.2859	15.2771	11.0496	16.5676	16.6661	16.6194	16.6177	9.70898
HIST1H4J	20.399	20.3853	20.3429	20.3757	15.316	15.2295	15.2859	15.2771	5.0986	16.5676	16.6661	16.6194	16.6177	3.75801
PLK2	26.4681	26.2481	26.3016	26.3393	15.316	15.2295	15.2859	15.2771	11.0621	16.5676	16.6661	16.6194	16.6177	9.72156
TXNIP	17.4192	17.4084	17.3034	17.377	15.316	15.2295	15.2859	15.2771	2.09988	16.5676	16.6661	16.6194	16.6177	0.759284
MYC	30.9835	30.9908	30.9291	30.9678	15.316	15.2295	15.2859	15.2771	15.6907	16.5676	16.6661	16.6194	16.6177	14.3501
JUN	19.9263	19.864	19.7919	19.8607	15.316	15.2295	15.2859	15.2771	4.5836	16.5676	16.6661	16.6194	16.6177	3.24301
FOS	18.4385	18.3837	18.367	18.3964	15.316	15.2295	15.2859	15.2771	3.11929	16.5676	16.6661	16.6194	16.6177	1.7787
CCNB1	25.9305	25.8389	25.7561	25.8418	15.316	15.2295	15.2859	15.2771	10.5647	16.5676	16.6661	16.6194	16.6177	9.22409
CDC20	25.3561	25.3359	25.2987	25.3302	15.316	15.2295	15.2859	15.2771	10.0531	16.5676	16.6661	16.6194	16.6177	8.7125
ABL1	25.6536	25.5547	25.4265	25.5449	15.316	15.2295	15.2859	15.2771	10.2678	16.5676	16.6661	16.6194	16.6177	8.9272
NRAS	20.2688	20.0887	20.1631	20.1735	15.316	15.2295	15.2859	15.2771	4.89641	16.5676	16.6661	16.6194	16.6177	3.55582
NUDT15	25.5841	25.5906	25.4613	25.5453	15.316	15.2295	15.2859	15.2771	10.2682	16.5676	16.6661	16.6194	16.6177	8.92762
NUDT18	35.452	34.8573	36.4665	35.5919	15.316	15.2295	15.2859	15.2771	20.3148	16.5676	16.6661	16.6194	16.6177	18.9742
NUDT4	25.584	25.459	25.4534	25.4988	15.316	15.2295	15.2859	15.2771	10.2217	16.5676	16.6661	16.6194	16.6177	8.8811
RAC2	22.0086	22.036	22.0835	22.0427	15.316	15.2295	15.2859	15.2771	6.76561	16.5676	16.6661	16.6194	16.6177	5.42501
7	UPN33				B2M					GAPDH
Target Name	CT-rep1	CT-rep2	CT-rep3	Ct Mean	CT-rep1	CT-rep2	CT-rep3	Ct Mean	∆Ct	CT-rep1	CT-rep2	CT-rep3	Ct Mean	∆Ct
ATF3	24.0208	23.9918	24.0446	24.019	16.8938	16.8044	16.9399	16.8794	7.13966	16.7211	16.8572	16.7608	16.7797	7.23936
FOSB	23.492	23.4022	23.4311	23.4418	16.8938	16.8044	16.9399	16.8794	6.56239	16.7211	16.8572	16.7608	16.7797	6.66209
HIST1H4J	20.588	20.5173	20.5699	20.5584	16.8938	16.8044	16.9399	16.8794	3.679	16.7211	16.8572	16.7608	16.7797	3.7787
PLK2	25.7787	25.5802	25.6147	25.6579	16.8938	16.8044	16.9399	16.8794	8.77849	16.7211	16.8572	16.7608	16.7797	8.87819
TXNIP	19.8514	19.8279	19.8222	19.8338	16.8938	16.8044	16.9399	16.8794	2.95443	16.7211	16.8572	16.7608	16.7797	3.05413
MYC	27.606	27.5668	27.7108	27.6279	16.8938	16.8044	16.9399	16.8794	10.7485	16.7211	16.8572	16.7608	16.7797	10.8482
JUN	19.0624	19.0075	19.0238	19.0313	16.8938	16.8044	16.9399	16.8794	2.15187	16.7211	16.8572	16.7608	16.7797	2.25158
FOS	19.1318	19.0833	19.0959	19.1037	16.8938	16.8044	16.9399	16.8794	2.22427	16.7211	16.8572	16.7608	16.7797	2.32397
CCNB1	23.928	23.9307	23.7706	23.8764	16.8938	16.8044	16.9399	16.8794	6.99706	16.7211	16.8572	16.7608	16.7797	7.09677
CDC20	24.1264	24.1204	24.0406	24.0958	16.8938	16.8044	16.9399	16.8794	7.2164	16.7211	16.8572	16.7608	16.7797	7.3161
ABL1	25.2902	25.2845	25.3301	25.3016	16.8938	16.8044	16.9399	16.8794	8.4222	16.7211	16.8572	16.7608	16.7797	8.5219
NRAS	20.7339	20.6734	20.6955	20.7009	16.8938	16.8044	16.9399	16.8794	3.82155	16.7211	16.8572	16.7608	16.7797	3.92125
NUDT15	24.6815	24.8571	24.7038	24.7475	16.8938	16.8044	16.9399	16.8794	7.86812	16.7211	16.8572	16.7608	16.7797	7.96782
NUDT18	33.6401	34.1089	33.9848	33.9113	16.8938	16.8044	16.9399	16.8794	17.0319	16.7211	16.8572	16.7608	16.7797	17.1316
NUDT4	25.2337	25.263	25.2374	25.2447	16.8938	16.8044	16.9399	16.8794	8.36535	16.7211	16.8572	16.7608	16.7797	8.46505
RAC2	21.5887	21.6073	21.6971	21.6311	16.8938	16.8044	16.9399	16.8794	4.75167	16.7211	16.8572	16.7608	16.7797	4.85137
8	UPN52				B2M					GAPDH
Target Name	CT-rep1	CT-rep2	CT-rep3	Ct Mean	CT-rep1	CT-rep2	CT-rep3	Ct Mean	∆Ct	CT-rep1	CT-rep2	CT-rep3	Ct Mean	∆Ct
ATF3	25.1506	25.0992	25.1897	25.1465	16.6452	16.6291	16.5984	16.6243	8.52222	17.4907	17.5586	17.4924	17.5139	7.63262
FOSB	24.4318	24.364	24.16	24.3186	16.6452	16.6291	16.5984	16.6243	7.69433	17.4907	17.5586	17.4924	17.5139	6.80473
HIST1H4J	20.0875	19.9244	19.8933	19.9684	16.6452	16.6291	16.5984	16.6243	3.34415	17.4907	17.5586	17.4924	17.5139	2.45455
PLK2	25.8814	25.7896	25.5654	25.7455	16.6452	16.6291	16.5984	16.6243	9.12119	17.4907	17.5586	17.4924	17.5139	8.23159
TXNIP	19.5703	19.5291	19.4315	19.5103	16.6452	16.6291	16.5984	16.6243	2.88605	17.4907	17.5586	17.4924	17.5139	1.99645
MYC	29.0677	29.1978	28.9489	29.0715	16.6452	16.6291	16.5984	16.6243	12.4472	17.4907	17.5586	17.4924	17.5139	11.5576
JUN	20.3041	20.0824	19.9746	20.1204	16.6452	16.6291	16.5984	16.6243	3.49609	17.4907	17.5586	17.4924	17.5139	2.60649
FOS	18.951	18.8286	18.8253	18.8683	16.6452	16.6291	16.5984	16.6243	2.24405	17.4907	17.5586	17.4924	17.5139	1.35444
CCNB1	26.2089	26.1389	26.3917	26.2465	16.6452	16.6291	16.5984	16.6243	9.62225	17.4907	17.5586	17.4924	17.5139	8.73264
CDC20	25.0367	25.0608	24.9865	25.028	16.6452	16.6291	16.5984	16.6243	8.40373	17.4907	17.5586	17.4924	17.5139	7.51412
ABL1	25.0188	25.2366	25.4097	25.2217	16.6452	16.6291	16.5984	16.6243	8.59741	17.4907	17.5586	17.4924	17.5139	7.7078
NRAS	20.5578	20.4753	20.7371	20.5901	16.6452	16.6291	16.5984	16.6243	3.9658	17.4907	17.5586	17.4924	17.5139	3.0762
NUDT15	24.9835	25.1075	24.7316	24.9409	16.6452	16.6291	16.5984	16.6243	8.3166	17.4907	17.5586	17.4924	17.5139	7.427
NUDT18	33.6744	33.0852	32.9911	33.2502	16.6452	16.6291	16.5984	16.6243	16.626	17.4907	17.5586	17.4924	17.5139	15.7364
NUDT4	23.9551	24.0283	23.9759	23.9864	16.6452	16.6291	16.5984	16.6243	7.36214	17.4907	17.5586	17.4924	17.5139	6.47254
RAC2	20.5378	20.5658	20.572	20.5585	16.6452	16.6291	16.5984	16.6243	3.93427	17.4907	17.5586	17.4924	17.5139	3.04467
9	UPN49				B2M					GAPDH
Target Name	CT-rep1	CT-rep2	CT-rep3	Ct Mean	CT-rep1	CT-rep2	CT-rep3	Ct Mean	∆Ct	CT-rep1	CT-rep2	CT-rep3	Ct Mean	∆Ct
ATF3	25.1919	25.1168	25.2061	25.1716	16.7867	16.7185	16.8261	16.7771	8.39454	15.828	15.8977	15.9748	15.9002	9.27144
FOSB	23.3939	23.3438	23.3544	23.364	16.7867	16.7185	16.8261	16.7771	6.58698	15.828	15.8977	15.9748	15.9002	7.46389
HIST1H4J	20.2163	20.1877	20.1607	20.1882	16.7867	16.7185	16.8261	16.7771	3.41118	15.828	15.8977	15.9748	15.9002	4.28809
PLK2	26.7249	26.7111	26.6904	26.7088	16.7867	16.7185	16.8261	16.7771	9.93172	15.828	15.8977	15.9748	15.9002	10.8086
TXNIP	20.2492	20.1788	20.0179	20.1486	16.7867	16.7185	16.8261	16.7771	3.37154	15.828	15.8977	15.9748	15.9002	4.24845
MYC	28.6989	28.683	28.6233	28.6684	16.7867	16.7185	16.8261	16.7771	11.8913	15.828	15.8977	15.9748	15.9002	12.7682
JUN	19.9706	19.873	19.8276	19.8904	16.7867	16.7185	16.8261	16.7771	3.11336	15.828	15.8977	15.9748	15.9002	3.99026
FOS	18.6131	18.5814	18.5157	18.5701	16.7867	16.7185	16.8261	16.7771	1.79301	15.828	15.8977	15.9748	15.9002	2.66992
CCNB1	25.1056	25.1378	25.0546	25.0993	16.7867	16.7185	16.8261	16.7771	8.32226	15.828	15.8977	15.9748	15.9002	9.19917
CDC20	25.6308	25.7231	25.5972	25.6504	16.7867	16.7185	16.8261	16.7771	8.8733	15.828	15.8977	15.9748	15.9002	9.75021
ABL1	25.5408	25.537	25.5034	25.5271	16.7867	16.7185	16.8261	16.7771	8.75001	15.828	15.8977	15.9748	15.9002	9.62692
NRAS	20.2394	20.092	20.0955	20.1423	16.7867	16.7185	16.8261	16.7771	3.36522	15.828	15.8977	15.9748	15.9002	4.24213
NUDT15	24.9803	24.9041	24.9395	24.9413	16.7867	16.7185	16.8261	16.7771	8.16423	15.828	15.8977	15.9748	15.9002	9.04114
NUDT18	35.36	38.1158	35.9658	36.4805	16.7867	16.7185	16.8261	16.7771	19.7035	15.828	15.8977	15.9748	15.9002	20.5804
NUDT4	25.1834	25.1467	25.1255	25.1519	16.7867	16.7185	16.8261	16.7771	8.37478	15.828	15.8977	15.9748	15.9002	9.25169
RAC2	21.7259	21.8003	21.8286	21.7849	16.7867	16.7185	16.8261	16.7771	5.00785	15.828	15.8977	15.9748	15.9002	5.88476
10	UPN34				B2M					GAPDH
Target Name	CT-rep1	CT-rep2	CT-rep3	Ct Mean	CT-rep1	CT-rep2	CT-rep3	Ct Mean	∆Ct	CT-rep1	CT-rep2	CT-rep3	Ct Mean	∆Ct
ATF3	24.3683	24.2101	24.3189	24.2991	16.7788	16.6824	16.8527	16.7713	7.52777	16.8885	16.98	16.9606	16.943	7.35604
FOSB	23.5041	23.4243	23.4877	23.472	16.7788	16.6824	16.8527	16.7713	6.70069	16.8885	16.98	16.9606	16.943	6.52896
HIST1H4J	20.9217	20.8138	20.8888	20.8748	16.7788	16.6824	16.8527	16.7713	4.10346	16.8885	16.98	16.9606	16.943	3.93173
PLK2	25.4859	25.4178	25.406	25.4366	16.7788	16.6824	16.8527	16.7713	8.66524	16.8885	16.98	16.9606	16.943	8.49352
TXNIP	19.0833	19.0177	19.0921	19.0644	16.7788	16.6824	16.8527	16.7713	2.29307	16.8885	16.98	16.9606	16.943	2.12134
MYC	29.5526	29.5193	29.5589	29.5436	16.7788	16.6824	16.8527	16.7713	12.7723	16.8885	16.98	16.9606	16.943	12.6006
JUN	18.5443	18.4662	18.4943	18.5016	16.7788	16.6824	16.8527	16.7713	1.73029	16.8885	16.98	16.9606	16.943	1.55856
FOS	17.2211	17.0979	17.1131	17.144	16.7788	16.6824	16.8527	16.7713	0.372701	16.8885	16.98	16.9606	16.943	0.200975
CCNB1	26.1655	26.1259	26.0023	26.0979	16.7788	16.6824	16.8527	16.7713	9.32661	16.8885	16.98	16.9606	16.943	9.15489
CDC20	25.5892	25.6148	25.3222	25.5088	16.7788	16.6824	16.8527	16.7713	8.73744	16.8885	16.98	16.9606	16.943	8.56571
ABL1	24.759	24.763	24.8674	24.7965	16.7788	16.6824	16.8527	16.7713	8.02515	16.8885	16.98	16.9606	16.943	7.85343
NRAS	20.5224	20.4164	20.5154	20.4847	16.7788	16.6824	16.8527	16.7713	3.71341	16.8885	16.98	16.9606	16.943	3.54169
NUDT15	24.3596	24.3381	24.3402	24.346	16.7788	16.6824	16.8527	16.7713	7.57465	16.8885	16.98	16.9606	16.943	7.40293
NUDT18	32.0894	32.1114	32.2239	32.1415	16.7788	16.6824	16.8527	16.7713	15.3702	16.8885	16.98	16.9606	16.943	15.1985
NUDT4	24.755	24.8657	24.8051	24.8086	16.7788	16.6824	16.8527	16.7713	8.03727	16.8885	16.98	16.9606	16.943	7.86554
RAC2	21.6523	21.6989	21.8503	21.7338	16.7788	16.6824	16.8527	16.7713	4.96253	16.8885	16.98	16.9606	16.943	4.7908
16	UPN32				B2M
Target Name	CT-rep1	CT-rep2	CT-rep3	Ct Mean	CT-rep1	CT-rep2	CT-rep3	Ct Mean	∆Ct
ATF3	25.9611	25.9253	25.9053	25.9306	17.5259	17.4625	17.5945	17.5276	8.403
FOSB	24.06	23.9761	24.0346	24.0235	17.5259	17.4625	17.5945	17.5276	6.49594
HIST1H4J	20.9246	20.8993	20.9141	20.9127	17.5259	17.4625	17.5945	17.5276	3.38509
PLK2	26.5928	26.4129	26.4246	26.4768	17.5259	17.4625	17.5945	17.5276	8.94915
TXNIP	19.6039	19.5659	19.594	19.5879	17.5259	17.4625	17.5945	17.5276	2.06034
MYC	31.764	31.7398	31.9594	31.8211	17.5259	17.4625	17.5945	17.5276	14.2935
JUN	19.9625	19.9045	19.8324	19.8998	17.5259	17.4625	17.5945	17.5276	2.3722
FOS	17.2084	17.1244	17.0691	17.134	17.5259	17.4625	17.5945	17.5276	-0.393611
CCNB1	26.3662	26.291	26.1884	26.2819	17.5259	17.4625	17.5945	17.5276	8.75431
CDC20	25.8789	26.0519	25.9841	25.9716	17.5259	17.4625	17.5945	17.5276	8.44401
ABL1	25.53	25.5566	25.5282	25.5383	17.5259	17.4625	17.5945	17.5276	8.01069
NRAS	20.9855	21.1734	21.1005	21.0865	17.5259	17.4625	17.5945	17.5276	3.55889
NUDT15	25.9219	25.901	25.9954	25.9394	17.5259	17.4625	17.5945	17.5276	8.41182
NUDT18	34.4017	34.1803	35.7267	34.7696	17.5259	17.4625	17.5945	17.5276	17.242
NUDT4	25.0544	25.2171	25.0191	25.0969	17.5259	17.4625	17.5945	17.5276	7.56927
RAC2	22.6631	22.703	22.7335	22.6999	17.5259	17.4625	17.5945	17.5276	5.17229
17	UPN36				B2M
Target Name	CT-rep1	CT-rep2	CT-rep3	Ct Mean	CT-rep1	CT-rep2	CT-rep3	Ct Mean	∆Ct
ATF3	26.2582	26.2662	26.1444	26.2229	16.8632	16.5522	16.6597	16.6917	9.53122
FOSB	25.9326	25.7691	25.8213	25.841	16.8632	16.5522	16.6597	16.6917	9.14931
HIST1H4J	19.7692	19.6428	19.7212	19.7111	16.8632	16.5522	16.6597	16.6917	3.01939
PLK2	26.9965	26.9801	26.9953	26.9907	16.8632	16.5522	16.6597	16.6917	10.299
TXNIP	19.1346	19.1202	19.105	19.1199	16.8632	16.5522	16.6597	16.6917	2.42822
MYC	30.9274	31.0026	31.2061	31.0454	16.8632	16.5522	16.6597	16.6917	14.3537
JUN	21.1113	21.0385	21.0599	21.0699	16.8632	16.5522	16.6597	16.6917	4.3782
FOS	18.4745	18.4516	18.6257	18.5173	16.8632	16.5522	16.6597	16.6917	1.82555
CCNB1	26.8919	26.7185	26.6745	26.7616	16.8632	16.5522	16.6597	16.6917	10.0699
CDC20	26.0849	26.0318	26.1397	26.0855	16.8632	16.5522	16.6597	16.6917	9.39376
ABL1	25.9465	25.957	25.9634	25.9557	16.8632	16.5522	16.6597	16.6917	9.26396
NRAS	20.504	20.4459	20.501	20.4836	16.8632	16.5522	16.6597	16.6917	3.7919
NUDT15	25.733	25.79	25.794	25.7723	16.8632	16.5522	16.6597	16.6917	9.08063
NUDT18	34.4332	34.889	34.6216	34.6479	16.8632	16.5522	16.6597	16.6917	17.9562
NUDT4	25.9708	25.9099	25.9447	25.9418	16.8632	16.5522	16.6597	16.6917	9.25011
RAC2	22.3569	22.5443	22.507	22.4694	16.8632	16.5522	16.6597	16.6917	5.77771
18	UPN51				B2M
Target Name	CT-rep1	CT-rep2	CT-rep3	Ct Mean	CT-rep1	CT-rep2	CT-rep3	Ct Mean	∆Ct
ATF3	25.1961	25.265	25.315	25.2587	16.6479	16.6768	16.7551	16.6933	8.56543
FOSB	23.711	23.7346	23.7611	23.7356	16.6479	16.6768	16.7551	16.6933	7.04231
HIST1H4J	20.6933	20.5996	20.5865	20.6265	16.6479	16.6768	16.7551	16.6933	3.9332
PLK2	26.0639	25.9447	25.9404	25.983	16.6479	16.6768	16.7551	16.6933	9.28971
TXNIP	18.1786	18.1123	18.0404	18.1104	16.6479	16.6768	16.7551	16.6933	1.41717
MYC	29.9955	29.8446	29.9072	29.9158	16.6479	16.6768	16.7551	16.6933	13.2225
JUN	19.9623	19.9398	19.8304	19.9108	16.6479	16.6768	16.7551	16.6933	3.21757
FOS	18.744	18.7087	18.6959	18.7162	16.6479	16.6768	16.7551	16.6933	2.02291
CCNB1	25.8675	25.8711	25.7055	25.8147	16.6479	16.6768	16.7551	16.6933	9.12145
CDC20	25.5395	25.5044	25.526	25.5233	16.6479	16.6768	16.7551	16.6933	8.83004
ABL1	25.1842	25.2869	25.2947	25.2552	16.6479	16.6768	16.7551	16.6933	8.56198
NRAS	19.9777	19.8903	19.9067	19.9249	16.6479	16.6768	16.7551	16.6933	3.23163
NUDT15	25.7738	25.6841	25.6925	25.7168	16.6479	16.6768	16.7551	16.6933	9.02353
NUDT18	34.8722	34.8234	33.9474	34.5477	16.6479	16.6768	16.7551	16.6933	17.8544
NUDT4	24.5785	24.5665	24.5378	24.5609	16.6479	16.6768	16.7551	16.6933	7.86766
RAC2	22.3225	22.4042	22.3791	22.3686	16.6479	16.6768	16.7551	16.6933	5.67534
19	UPN53				B2M
Target Name	CT-rep1	CT-rep2	CT-rep3	Ct Mean	CT-rep1	CT-rep2	CT-rep3	Ct Mean	∆Ct
ATF3	25.5793	25.4556	25.4818	25.5056	16.1773	16.1705	16.1937	16.1805	9.32504
FOSB	23.7513	23.6711	23.7174	23.7133	16.1773	16.1705	16.1937	16.1805	7.53274
HIST1H4J	19.5697	19.4739	19.5076	19.5171	16.1773	16.1705	16.1937	16.1805	3.33654
PLK2	26.6595	26.4788	26.3658	26.5014	16.1773	16.1705	16.1937	16.1805	10.3208
TXNIP	19.3788	19.3932	19.3261	19.366	16.1773	16.1705	16.1937	16.1805	3.18552
MYC	29.791	29.7524	29.6552	29.7329	16.1773	16.1705	16.1937	16.1805	13.5524
JUN	20.5794	20.4744	20.4046	20.4862	16.1773	16.1705	16.1937	16.1805	4.30563
FOS	17.9752	18.1228	17.9298	18.0093	16.1773	16.1705	16.1937	16.1805	1.82876
CCNB1	24.351	24.3095	24.2728	24.3111	16.1773	16.1705	16.1937	16.1805	8.13056
CDC20	24.73	24.7109	24.6711	24.704	16.1773	16.1705	16.1937	16.1805	8.52347
ABL1	26.1235	26.207	26.1329	26.1544	16.1773	16.1705	16.1937	16.1805	9.9739
NRAS	20.0286	20.0478	20.0441	20.0401	16.1773	16.1705	16.1937	16.1805	3.85962
NUDT15	25.4888	25.4699	25.4364	25.465	16.1773	16.1705	16.1937	16.1805	9.2845
NUDT18	34.951	34.8426	35.2282	35.0073	16.1773	16.1705	16.1937	16.1805	18.8267
NUDT4	22.9566	22.977	22.9611	22.9649	16.1773	16.1705	16.1937	16.1805	6.78436
RAC2	22.4352	22.5499	22.5281	22.5044	16.1773	16.1705	16.1937	16.1805	6.32388
20	UPN46				B2M
Target Name	CT-rep1	CT-rep2	CT-rep3	Ct Mean	CT-rep1	CT-rep2	CT-rep3	Ct Mean	∆Ct
ATF3	25.1691	25.1378	25.1771	25.1613	16.3464	16.3217	16.3997	16.3559	8.80539
FOSB	23.4769	23.4532	23.4851	23.4717	16.3464	16.3217	16.3997	16.3559	7.11578
HIST1H4J	20.964	20.7036	20.7351	20.8009	16.3464	16.3217	16.3997	16.3559	4.44493
PLK2	26.0664	25.9439	25.9188	25.9764	16.3464	16.3217	16.3997	16.3559	9.62045
TXNIP	18.1638	18.1058	18.0602	18.1099	16.3464	16.3217	16.3997	16.3559	1.75397
MYC	29.4784	29.4298	29.3815	29.4299	16.3464	16.3217	16.3997	16.3559	13.0739
JUN	19.8561	19.7521	19.6951	19.7677	16.3464	16.3217	16.3997	16.3559	3.41179
FOS	18.3246	18.3651	18.2104	18.3001	16.3464	16.3217	16.3997	16.3559	1.94413
CCNB1	25.1701	25.1183	25.0888	25.1257	16.3464	16.3217	16.3997	16.3559	8.7698
CDC20	25.22	25.168	25.1166	25.1682	16.3464	16.3217	16.3997	16.3559	8.81227
ABL1	24.3476	24.4627	24.384	24.3981	16.3464	16.3217	16.3997	16.3559	8.04216
NRAS	20.2727	20.2414	20.3626	20.2922	16.3464	16.3217	16.3997	16.3559	3.93628
NUDT15	24.997	24.9399	24.9473	24.9614	16.3464	16.3217	16.3997	16.3559	8.60549
NUDT18	33.0635	32.9418	32.9143	32.9732	16.3464	16.3217	16.3997	16.3559	16.6172
NUDT4	24.9799	25.1148	25.0675	25.0541	16.3464	16.3217	16.3997	16.3559	8.69813
RAC2	20.4465	20.9881	20.4992	20.6446	16.3464	16.3217	16.3997	16.3559	4.28864
21	UPN47				B2M
Target Name	CT-rep1	CT-rep2	CT-rep3	Ct Mean	CT-rep1	CT-rep2	CT-rep3	Ct Mean	∆Ct
ATF3	26.3211	26.2221	26.2298	26.2577	17.4708	17.4752	17.5794	17.5085	8.74919
FOSB	25.2006	25.1179	25.1172	25.1452	17.4708	17.4752	17.5794	17.5085	7.63678
HIST1H4J	22.0454	21.8717	21.9866	21.9679	17.4708	17.4752	17.5794	17.5085	4.45942
PLK2	27.456	27.3757	27.3935	27.4084	17.4708	17.4752	17.5794	17.5085	9.89993
TXNIP	19.0925	19.0362	19.0155	19.0481	17.4708	17.4752	17.5794	17.5085	1.5396
MYC	31.7122	31.4802	31.5399	31.5774	17.4708	17.4752	17.5794	17.5085	14.069
JUN	20.8933	20.8308	20.8453	20.8565	17.4708	17.4752	17.5794	17.5085	3.348
FOS	19.9241	19.8671	19.8028	19.8647	17.4708	17.4752	17.5794	17.5085	2.35622
CCNB1	26.5634	26.5133	26.424	26.5002	17.4708	17.4752	17.5794	17.5085	8.99176
CDC20	26.6656	26.8332	26.6272	26.7087	17.4708	17.4752	17.5794	17.5085	9.2002
ABL1	25.8432	25.8461	25.759	25.8161	17.4708	17.4752	17.5794	17.5085	8.30764
NRAS	21.3638	21.3374	21.3328	21.3447	17.4708	17.4752	17.5794	17.5085	3.83622
NUDT15	25.8636	25.7715	25.7843	25.8065	17.4708	17.4752	17.5794	17.5085	8.29801
NUDT18	34.426	34.2364	34.7918	34.4847	17.4708	17.4752	17.5794	17.5085	16.9763
NUDT4	25.4529	25.606	25.5061	25.5217	17.4708	17.4752	17.5794	17.5085	8.0132
RAC2	22.866	22.9404	22.969	22.9251	17.4708	17.4752	17.5794	17.5085	5.41665

## Sheet: ATF3
		ATF3				B2M
Sl No	Patient#	CT-rep1	CT-rep2	CT-rep3	Ct Mean	CT-rep1	CT-rep2	CT-rep3	Ct Mean	∆Ct	Mean ∆Ct	∆∆Ct	2^(-∆∆Ct)
1	UPN13	24.7388	24.6929	24.6879	24.7065	16.0702	16.0196	16.0587	16.0495	8.65703
2	UPN28	23.2506	23.1711	23.1285	23.1834	16.8932	16.8581	16.975	16.9088	6.27463
3	UPN56	26.2146	26.1514	26.0293	26.1318	17.3254	17.0757	17.0833	17.1615	8.97029
4	UPN23	26.5881	26.252	26.279	26.373	17.6545	17.6377	17.745	17.6791	8.69395
5	UPN24	25.8369	25.7555	25.7551	25.7825	17.1315	17.0996	17.2597	17.1636	8.61891
6	UPN11	24.1644	24.1455	24.2907	24.2002	16.0882	15.9373	16.0535	16.0263	8.17391
7	UPN12	24.4733	24.4776	24.3933	24.4481	16.667	16.5796	16.6839	16.6435	7.8046
8	UPN25	23.2074	23.1486	23.2884	23.2148	18.6688	18.6749	18.428	18.5906	4.62425
9	UPN54	27.3408	27.4347	27.2815	27.3523	17.8717	17.4932	16.6882	17.351	10.0013
	UPN44	22.8528	22.7861	22.8126	22.8172	16.6564	16.5927	16.705	16.6514	6.16581
10											7.79847	-0.890557	1.85389
11	BV_15_186.UPD				#DIV/0!				#DIV/0!	#DIV/0!
12	BV_16_578.UPD				#DIV/0!				#DIV/0!	#DIV/0!
11	UPN8	25.8811	25.9511	25.8466	25.8929	15.316	15.2295	15.2859	15.2771	10.6158
12	UPN33	24.0208	23.9918	24.0446	24.019	16.8938	16.8044	16.9399	16.8794	7.13966
13	UPN28	25.1506	25.0992	25.1897	25.1465	16.6452	16.6291	16.5984	16.6243	8.52222
14	UPN49	25.1919	25.1168	25.2061	25.1716	16.7867	16.7185	16.8261	16.7771	8.39454
15	UPN34	24.3683	24.2101	24.3189	24.2991	16.7788	16.6824	16.8527	16.7713	7.52777
16	UPN32	25.9611	25.9253	25.9053	25.9306	17.5259	17.4625	17.5945	17.5276	8.403
17	UPN36	26.2582	26.2662	26.1444	26.2229	16.8632	16.5522	16.6597	16.6917	9.53122
18	UPN51	25.1961	25.265	25.315	25.2587	16.6479	16.6768	16.7551	16.6933	8.56543
19	UPN53	25.5793	25.4556	25.4818	25.5056	16.1773	16.1705	16.1937	16.1805	9.32504
20	UPN46	25.1691	25.1378	25.1771	25.1613	16.3464	16.3217	16.3997	16.3559	8.80539
21	UPN47	26.3211	26.2221	26.2298	26.2577	17.4708	17.4752	17.5794	17.5085	8.74919	8.68902

## Sheet: FOSB
		FOSB				B2M
Sl No	Patient#	CT-rep1	CT-rep2	CT-rep3	Ct Mean	CT-rep1	CT-rep2	CT-rep3	Ct Mean	∆Ct	Mean ∆Ct	∆∆Ct	2^(-∆∆Ct)
1	UPN13	22.134	22.1516	22.2017	22.1624	16.0702	16.0196	16.0587	16.0495	6.11293
2	UPN28	20.9838	20.9813	21.0544	21.0065	16.8932	16.8581	16.975	16.9088	4.09773
3	UPN56	22.2157	22.2245	22.2522	22.2308	17.3254	17.0757	17.0833	17.1615	5.06932
4	UPN23	24.5036	24.3576	24.3719	24.411	17.6545	17.6377	17.745	17.6791	6.73194
5	UPN24	23.2288	23.2493	23.2101	23.2294	17.1315	17.0996	17.2597	17.1636	6.06582
6	UPN11	21.2329	21.1876	21.1945	21.205	16.0882	15.9373	16.0535	16.0263	5.17871
7	UPN12	22.9492	22.8881	22.6495	22.829	16.667	16.5796	16.6839	16.6435	6.18547
8	UPN25	21.6616	21.6336	21.659	21.6514	18.6688	18.6749	18.428	18.5906	3.06081
9	UPN54	24.9033	24.8325	24.8232	24.853	17.8717	17.4932	16.6882	17.351	7.50194
10	UPN44	21.3256	21.1984	21.1076	21.2105	16.6564	16.5927	16.705	16.6514	4.55917
											5.45638	-2.1406	4.40945
11	UPN8	26.2994	26.3169	26.3638	26.3267	15.316	15.2295	15.2859	15.2771	11.0496
12	UPN33	23.492	23.4022	23.4311	23.4418	16.8938	16.8044	16.9399	16.8794	6.56239
13	UPN28	24.4318	24.364	24.16	24.3186	16.6452	16.6291	16.5984	16.6243	7.69433
14	UPN49	23.3939	23.3438	23.3544	23.364	16.7867	16.7185	16.8261	16.7771	6.58698
15	UPN34	23.5041	23.4243	23.4877	23.472	16.7788	16.6824	16.8527	16.7713	6.70069
16	UPN32	24.06	23.9761	24.0346	24.0235	17.5259	17.4625	17.5945	17.5276	6.49594
17	UPN36	25.9326	25.7691	25.8213	25.841	16.8632	16.5522	16.6597	16.6917	9.14931
18	UPN51	23.711	23.7346	23.7611	23.7356	16.6479	16.6768	16.7551	16.6933	7.04231
19	UPN53	23.7513	23.6711	23.7174	23.7133	16.1773	16.1705	16.1937	16.1805	7.53274
20	UPN46	23.4769	23.4532	23.4851	23.4717	16.3464	16.3217	16.3997	16.3559	7.11578
21	UPN47	25.2006	25.1179	25.1172	25.1452	17.4708	17.4752	17.5794	17.5085	7.63678	7.59698

## Sheet: HIST1H4J
		HIST1H4J				B2M
Sl No	Patient#	CT-rep1	CT-rep2	CT-rep3	Ct Mean	CT-rep1	CT-rep2	CT-rep3	Ct Mean	∆Ct	Mean ∆Ct	∆∆Ct	2^(-∆∆Ct)
1	UPN13	18.3035	18.2672	18.162	18.2442	16.0702	16.0196	16.0587	16.0495	2.19475
2	UPN28	20.0607	20.0163	20.0658	20.0476	16.8932	16.8581	16.975	16.9088	3.13882
3	UPN56	20.6336	20.5624	20.5771	20.591	17.3254	17.0757	17.0833	17.1615	3.42956
4	UPN23	20.6041	20.5463	20.5479	20.5661	17.6545	17.6377	17.745	17.6791	2.88703
5	UPN24	20.3212	20.2824	20.3205	20.3081	17.1315	17.0996	17.2597	17.1636	3.14447
6	UPN11	19.7274	19.6392	19.6932	19.6866	16.0882	15.9373	16.0535	16.0263	3.66031
7	UPN12	19.3655	19.3922	19.3949	19.3842	16.667	16.5796	16.6839	16.6435	2.74069
8	UPN25	20.4603	20.4425	20.3336	20.4121	18.6688	18.6749	18.428	18.5906	1.82155
9	UPN54	18.9999	18.9592	18.7793	18.9128	17.8717	17.4932	16.6882	17.351	1.56173
10	UPN44	20.3023	20.2763	20.2509	20.2765	16.6564	16.5927	16.705	16.6514	3.62518
											2.82041	-1.01731	2.02415
11	UPN8	20.399	20.3853	20.3429	20.3757	15.316	15.2295	15.2859	15.2771	5.0986
12	UPN33	20.588	20.5173	20.5699	20.5584	16.8938	16.8044	16.9399	16.8794	3.679
13	UPN28	20.0875	19.9244	19.8933	19.9684	16.6452	16.6291	16.5984	16.6243	3.34415
14	UPN49	20.2163	20.1877	20.1607	20.1882	16.7867	16.7185	16.8261	16.7771	3.41118
15	UPN34	20.9217	20.8138	20.8888	20.8748	16.7788	16.6824	16.8527	16.7713	4.10346
16	UPN32	20.9246	20.8993	20.9141	20.9127	17.5259	17.4625	17.5945	17.5276	3.38509
17	UPN36	19.7692	19.6428	19.7212	19.7111	16.8632	16.5522	16.6597	16.6917	3.01939
18	UPN51	20.6933	20.5996	20.5865	20.6265	16.6479	16.6768	16.7551	16.6933	3.9332
19	UPN53	19.5697	19.4739	19.5076	19.5171	16.1773	16.1705	16.1937	16.1805	3.33654
20	UPN46	20.964	20.7036	20.7351	20.8009	16.3464	16.3217	16.3997	16.3559	4.44493
21	UPN47	22.0454	21.8717	21.9866	21.9679	17.4708	17.4752	17.5794	17.5085	4.45942	3.83772

## Sheet: PLK2
		PLK2				B2M
Sl No	Patient#	CT-rep1	CT-rep2	CT-rep3	Ct Mean	CT-rep1	CT-rep2	CT-rep3	Ct Mean	∆Ct	Mean ∆Ct	∆∆Ct	2^(-∆∆Ct)
1	UPN13	24.6016	24.448	24.5153	24.5216	16.0702	16.0196	16.0587	16.0495	8.47217
2	UPN28	23.984	23.9137	23.87	23.9226	16.8932	16.8581	16.975	16.9088	7.01378
3	UPN56	24.8393	24.8138	24.8076	24.8202	17.3254	17.0757	17.0833	17.1615	7.65876
4	UPN23	28.2132	28.1488	28.1208	28.1609	17.6545	17.6377	17.745	17.6791	10.4818
5	UPN24	25.0909	25.1009	24.9677	25.0532	17.1315	17.0996	17.2597	17.1636	7.88958
6	UPN11	25.0176	25.0779	25.0942	25.0632	16.0882	15.9373	16.0535	16.0263	9.03689
7	UPN12	24.7721	24.7144	24.7468	24.7444	16.667	16.5796	16.6839	16.6435	8.10094
8	UPN25	25.0314	24.9779	25.0367	25.0153	18.6688	18.6749	18.428	18.5906	6.42477
9	UPN54	26.3231	26.1826	25.8511	26.1189	17.8717	17.4932	16.6882	17.351	8.76787
10	UPN44	24.9382	25.4384	24.2956	24.8907	16.6564	16.5927	16.705	16.6514	8.23937
											8.2086	-1.42211	2.67978
11	UPN8	26.4681	26.2481	26.3016	26.3393	15.316	15.2295	15.2859	15.2771	11.0621
12	UPN33	25.7787	25.5802	25.6147	25.6579	16.8938	16.8044	16.9399	16.8794	8.77849
13	UPN28	25.8814	25.7896	25.5654	25.7455	16.6452	16.6291	16.5984	16.6243	9.12119
14	UPN49	26.7249	26.7111	26.6904	26.7088	16.7867	16.7185	16.8261	16.7771	9.93172
15	UPN34	25.4859	25.4178	25.406	25.4366	16.7788	16.6824	16.8527	16.7713	8.66524
16	UPN32	26.5928	26.4129	26.4246	26.4768	17.5259	17.4625	17.5945	17.5276	8.94915
17	UPN36	26.9965	26.9801	26.9953	26.9907	16.8632	16.5522	16.6597	16.6917	10.299
18	UPN51	26.0639	25.9447	25.9404	25.983	16.6479	16.6768	16.7551	16.6933	9.28971
19	UPN53	26.6595	26.4788	26.3658	26.5014	16.1773	16.1705	16.1937	16.1805	10.3208
20	UPN46	26.0664	25.9439	25.9188	25.9764	16.3464	16.3217	16.3997	16.3559	9.62045
21	UPN47	27.456	27.3757	27.3935	27.4084	17.4708	17.4752	17.5794	17.5085	9.89993	9.63071

## Sheet: TXNIP
		TXNIP				B2M
Sl No	Patient#	CT-rep1	CT-rep2	CT-rep3	Ct Mean	CT-rep1	CT-rep2	CT-rep3	Ct Mean	∆Ct	Mean ∆Ct	∆∆Ct	2^(-∆∆Ct)
1	UPN13	17.0603	17.0491	17.0179	17.0425	16.0702	16.0196	16.0587	16.0495	0.99298
2	UPN28	19.5431	19.7008	19.5038	19.5826	16.8932	16.8581	16.975	16.9088	2.67381
3	UPN56	19.2149	19.1932	19.1406	19.1829	17.3254	17.0757	17.0833	17.1615	2.02146
4	UPN23	20.5902	20.398	20.4898	20.4927	17.6545	17.6377	17.745	17.6791	2.81359
5	UPN24	18.1537	18.0832	18.1743	18.1371	17.1315	17.0996	17.2597	17.1636	0.973499
6	UPN11	19.6441	19.6196	19.6212	19.6283	16.0882	15.9373	16.0535	16.0263	3.60197
7	UPN12	21.1597	21.2708	21.2516	21.2274	16.667	16.5796	16.6839	16.6435	4.58388
8	UPN25	21.128	21.0486	20.9015	21.026	18.6688	18.6749	18.428	18.5906	2.43546
9	UPN54	19.7903	19.7753	19.7202	19.762	17.8717	17.4932	16.6882	17.351	2.41092
10	UPN44	18.9798	18.9488	18.9272	18.9519	16.6564	16.5927	16.705	16.6514	2.30057
											2.48081	0.118106	0.921397
11	UPN8	17.4192	17.4084	17.3034	17.377	15.316	15.2295	15.2859	15.2771	2.09988
12	UPN33	19.8514	19.8279	19.8222	19.8338	16.8938	16.8044	16.9399	16.8794	2.95443
13	UPN28	19.5703	19.5291	19.4315	19.5103	16.6452	16.6291	16.5984	16.6243	2.88605
14	UPN49	20.2492	20.1788	20.0179	20.1486	16.7867	16.7185	16.8261	16.7771	3.37154
15	UPN34	19.0833	19.0177	19.0921	19.0644	16.7788	16.6824	16.8527	16.7713	2.29307
16	UPN32	19.6039	19.5659	19.594	19.5879	17.5259	17.4625	17.5945	17.5276	2.06034
17	UPN36	19.1346	19.1202	19.105	19.1199	16.8632	16.5522	16.6597	16.6917	2.42822
18	UPN51	18.1786	18.1123	18.0404	18.1104	16.6479	16.6768	16.7551	16.6933	1.41717
19	UPN53	19.3788	19.3932	19.3261	19.366	16.1773	16.1705	16.1937	16.1805	3.18552
20	UPN46	18.1638	18.1058	18.0602	18.1099	16.3464	16.3217	16.3997	16.3559	1.75397
21	UPN47	19.0925	19.0362	19.0155	19.0481	17.4708	17.4752	17.5794	17.5085	1.5396	2.36271

## Sheet: MYC
		MYC				B2M
Sl No	Patient#	CT-rep1	CT-rep2	CT-rep3	Ct Mean	CT-rep1	CT-rep2	CT-rep3	Ct Mean	∆Ct	Mean ∆Ct	∆∆Ct	2^(-∆∆Ct)
1	UPN13	28.1614	27.9981	27.9772	28.0456	16.0702	16.0196	16.0587	16.0495	11.9961
2	UPN28	25.1549	25.0335	25.0862	25.0915	16.8932	16.8581	16.975	16.9088	8.18276
3	UPN56	26.991	26.8392	26.8947	26.9083	17.3254	17.0757	17.0833	17.1615	9.74681
4	UPN23	30.4161	30.0853	30.034	30.1785	17.6545	17.6377	17.745	17.6791	12.4994
5	UPN24	29.6316	29.58	29.5319	29.5812	17.1315	17.0996	17.2597	17.1636	12.4176
6	UPN11	27.7036	27.5402	27.6057	27.6165	16.0882	15.9373	16.0535	16.0263	11.5902
7	UPN12	29.8838	29.7079	29.1978	29.5965	16.667	16.5796	16.6839	16.6435	12.953
8	UPN25	30.1212	30.023	30.0091	30.0511	18.6688	18.6749	18.428	18.5906	11.4605
9	UPN54	27.4328	27.3356	27.3225	27.3637	17.8717	17.4932	16.6882	17.351	10.0126
10	UPN44	28.9073	28.7502	28.8386	28.832	16.6564	16.5927	16.705	16.6514	12.1807
											11.304	-1.97921	3.94278
11	UPN8	30.9835	30.9908	30.9291	30.9678	15.316	15.2295	15.2859	15.2771	15.6907
12	UPN33	27.606	27.5668	27.7108	27.6279	16.8938	16.8044	16.9399	16.8794	10.7485
13	UPN28	29.0677	29.1978	28.9489	29.0715	16.6452	16.6291	16.5984	16.6243	12.4472
14	UPN49	28.6989	28.683	28.6233	28.6684	16.7867	16.7185	16.8261	16.7771	11.8913
15	UPN34	29.5526	29.5193	29.5589	29.5436	16.7788	16.6824	16.8527	16.7713	12.7723
16	UPN32	31.764	31.7398	31.9594	31.8211	17.5259	17.4625	17.5945	17.5276	14.2935
17	UPN36	30.9274	31.0026	31.2061	31.0454	16.8632	16.5522	16.6597	16.6917	14.3537
18	UPN51	29.9955	29.8446	29.9072	29.9158	16.6479	16.6768	16.7551	16.6933	13.2225
19	UPN53	29.791	29.7524	29.6552	29.7329	16.1773	16.1705	16.1937	16.1805	13.5524
20	UPN46	29.4784	29.4298	29.3815	29.4299	16.3464	16.3217	16.3997	16.3559	13.0739
21	UPN47	31.7122	31.4802	31.5399	31.5774	17.4708	17.4752	17.5794	17.5085	14.069	13.2832

## Sheet: JUN
		JUN				B2M
Sl No	Patient#	CT-rep1	CT-rep2	CT-rep3	Ct Mean	CT-rep1	CT-rep2	CT-rep3	Ct Mean	∆Ct	Mean ∆Ct	∆∆Ct	2^(-∆∆Ct)
1	UPN13	18.1719	18.1288	18.1214	18.1407	16.0702	16.0196	16.0587	16.0495	2.09123
2	UPN28	17.7979	17.7452	17.7474	17.7635	16.8932	16.8581	16.975	16.9088	0.854713
3	UPN56	20.0422	20.0272	19.9755	20.015	17.3254	17.0757	17.0833	17.1615	2.85351
4	UPN23	20.5343	20.4164	20.378	20.4429	17.6545	17.6377	17.745	17.6791	2.7638
5	UPN24	18.94	18.87	18.85	18.8867	17.1315	17.0996	17.2597	17.1636	1.72308
6	UPN11	18.4161	18.0766	18.038	18.1769	16.0882	15.9373	16.0535	16.0263	2.15061
7	UPN12	20.228	20.125	20.0633	20.1388	16.667	16.5796	16.6839	16.6435	3.49526
8	UPN25	20.0049	20.1351	18.8981	19.6794	18.6688	18.6749	18.428	18.5906	1.08881
9	UPN54	20.9427	20.826	20.8234	20.8641	17.8717	17.4932	16.6882	17.351	3.51301
10	UPN44	17.5987	17.5281	17.4968	17.5412	16.6564	16.5927	16.705	16.6514	0.889846
											2.14239	-1.14021	2.20414
11	UPN8	19.9263	19.864	19.7919	19.8607	15.316	15.2295	15.2859	15.2771	4.5836
12	UPN33	19.0624	19.0075	19.0238	19.0313	16.8938	16.8044	16.9399	16.8794	2.15187
13	UPN28	20.3041	20.0824	19.9746	20.1204	16.6452	16.6291	16.5984	16.6243	3.49609
14	UPN49	19.9706	19.873	19.8276	19.8904	16.7867	16.7185	16.8261	16.7771	3.11336
15	UPN34	18.5443	18.4662	18.4943	18.5016	16.7788	16.6824	16.8527	16.7713	1.73029
16	UPN32	19.9625	19.9045	19.8324	19.8998	17.5259	17.4625	17.5945	17.5276	2.3722
17	UPN36	21.1113	21.0385	21.0599	21.0699	16.8632	16.5522	16.6597	16.6917	4.3782
18	UPN51	19.9623	19.9398	19.8304	19.9108	16.6479	16.6768	16.7551	16.6933	3.21757
19	UPN53	20.5794	20.4744	20.4046	20.4862	16.1773	16.1705	16.1937	16.1805	4.30563
20	UPN46	19.8561	19.7521	19.6951	19.7677	16.3464	16.3217	16.3997	16.3559	3.41179
21	UPN47	20.8933	20.8308	20.8453	20.8565	17.4708	17.4752	17.5794	17.5085	3.348	3.2826

## Sheet: FOS
		FOS				B2M
Sl No	Patient#	CT-rep1	CT-rep2	CT-rep3	Ct Mean	CT-rep1	CT-rep2	CT-rep3	Ct Mean	∆Ct	Mean ∆Ct	∆∆Ct	2^(-∆∆Ct)
1	UPN13	16.3851	16.3046	16.2698	16.3198	16.0702	16.0196	16.0587	16.0495	0.270346
2	UPN28	16.7726	16.7025	16.7032	16.7261	16.8932	16.8581	16.975	16.9088	-0.182673
3	UPN56	18.8894	18.328	18.3606	18.526	17.3254	17.0757	17.0833	17.1615	1.36454
4	UPN23	18.5591	18.4829	18.4468	18.4963	17.6545	17.6377	17.745	17.6791	0.817203
5	UPN24	16.2044	15.9999	15.9901	16.0648	17.1315	17.0996	17.2597	17.1636	-1.0988
6	UPN11	16.2563	16.1802	16.1275	16.188	16.0882	15.9373	16.0535	16.0263	0.161692
7	UPN12	17.2801	17.2174	17.1873	17.2282	16.667	16.5796	16.6839	16.6435	0.584752
8	UPN25	17.3937	17.3517	16.5481	17.0978	18.6688	18.6749	18.428	18.5906	-1.49275
9	UPN54	20.2186	20.1531	20.1526	20.1748	17.8717	17.4932	16.6882	17.351	2.82372
10	UPN44	16.3605	16.2482	16.2503	16.2863	16.6564	16.5927	16.705	16.6514	-0.365033
											0.2883	-1.46963	2.76952
11	UPN8	18.4385	18.3837	18.367	18.3964	15.316	15.2295	15.2859	15.2771	3.11929
12	UPN33	19.1318	19.0833	19.0959	19.1037	16.8938	16.8044	16.9399	16.8794	2.22427
13	UPN28	18.951	18.8286	18.8253	18.8683	16.6452	16.6291	16.5984	16.6243	2.24405
14	UPN49	18.6131	18.5814	18.5157	18.5701	16.7867	16.7185	16.8261	16.7771	1.79301
15	UPN34	17.2211	17.0979	17.1131	17.144	16.7788	16.6824	16.8527	16.7713	0.372701
16	UPN32	17.2084	17.1244	17.0691	17.134	17.5259	17.4625	17.5945	17.5276	-0.393611
17	UPN36	18.4745	18.4516	18.6257	18.5173	16.8632	16.5522	16.6597	16.6917	1.82555
18	UPN51	18.744	18.7087	18.6959	18.7162	16.6479	16.6768	16.7551	16.6933	2.02291
19	UPN53	17.9752	18.1228	17.9298	18.0093	16.1773	16.1705	16.1937	16.1805	1.82876
20	UPN46	18.3246	18.3651	18.2104	18.3001	16.3464	16.3217	16.3997	16.3559	1.94413
21	UPN47	19.9241	19.8671	19.8028	19.8647	17.4708	17.4752	17.5794	17.5085	2.35622	1.75793

[truncated: 9 more sheets: CCNB1, CDC20, ABL1, NRAS, NUDT15, NUDT18, NUDT4, RAC2, Summary]
