# Supplementary material for: Unique mutation and gene expression in High Hyperdiploid Acute Lymphoblastic Leukaemia with whole chromosome uniparental isodisomy
Source: Research Square preprint supplement (doi:10.21203/rs.3.rs-1349722/v1), 2022-02-16
Supplement: Supplementary file 11 [file 9c2fef5aec11814bfa48ee03.xlsx]

## Sheet: Gene List
Supplementary Table 3.1 List of genes included in the targeted panel sequencing.
Sl no.	Gene Symbol	Name	Entrez GeneId	Cosmic Genome Location	Ensembl Genome Location	Uniprot	Chr Band	Gene Length
1	ADRB2	adrenoceptor beta 2	154	5:148826593..148828634	Chromosome 5: 148,825,245-148,828,687	P07550	5q32	2042 bp
2	ALK	anaplastic lymphoma kinase (Ki-1)	238	2:29193224-29920659	Chromosome 2: 29,192,774-29,921,566	Q9UM73	2p23	728838 bp
3	ARID1A	AT rich interactive domain 1A (SWI-like)	8289	1:26696404-26780756	Chromosome 1: 26,693,236-26,782,104	O14497	1p35.3	86080 bp
4	ASMTL	Acetylserotonin O-Methyltransferase-Like	8623	X:1403269..1452840	Chromosome X: 1,403,139-1,453,762	O95671	Xp22.33 and Yp11.2	50656 bp
5	ASXL1	Additional Sex combs like 1	171023	32358062..32439319	Chromosome 20: 32,358,344-32,439,319	Q8IXJ9	20q11.21	81258 bp
6	ATM	ataxia telangiectasia mutated	472	11:108227625-108365508	Chromosome 11: 108,222,484-108,369,102	Q13315	11q22.3	146619 bp
7	ATRX	alpha thalassemia/mental retardation syndrome X-linked	546	X:77508351-77786001	Chromosome X: 77,504,878-77,786,269	P46100	Xq21.1	281392 bp
8	BCR	breakpoint cluster region	613	22:23180961-23315522	Chromosome 22: 23,179,704-23,318,037	P11274	22q11.21	137673 bp
9	BRAF	v-raf murine sarcoma viral oncogene homolog B1	673	7:140734597-140924703	Chromosome 7: 140,719,327-140,924,764	P15056	7q34	205434 bp
10	BTG1	B-cell translocation gene 1, anti-proliferative	694	12:92144080-92145535	Chromosome 12: 92,140,278-92,145,897	P62324	12q22	5620 bp
11	CBL	Cas-Br-M (murine) ecotropic retroviral transforming	867	11:119206418-119299781	Chromosome 11: 119,206,276-119,313,926	P22681	11q23.3	101874 bp
12	CDKN2A	cyclin-dependent kinase inhibitor 2A (p16(INK4a)) gene	1029	9:21968229-21974827	Chromosome 9: 21,967,753-21,995,301	P42771	9p21	27292 bp
13	CDKN2B	Cyclin Dependent Kinase Inhibitor 2B	1030,	9:22005987..22008953	Chromosome 9: 22,002,903-22,009,363	P42772	5q32	23076 bp
14	CHD1	chromodomain helicase DNA binding protein 1	1105	5:98855204..98929014	Chromosome 5: 98,853,985-98,928,957	P32657	5q15-q21.1	73811 bp
15	CHD4	Chromodomain Helicase DNA binding protein 4	1108	(6570082..6607439, complement)	Chromosome 12: 6,570,083-6,607,476	Q14839	12p13.31	37358 bp
16	CREBBP	CREB binding protein (CBP)	1387	16:3727718-3879916	Chromosome 16: 3,725,054-3,880,726	Q92793	16p13.3	155674 bp
17	CRLF2	Cytokine Receptor-Like Factor 2	64109	1187549-1212815	X:1196780..1212634	Q9HC73	Xp22.33	22326 bp
18	CSF1R	Colony Stimulating Factor 1 Receptor	1436	5:150054069..150086427	Chromosome 5: 150,053,291-150,113,372	P07333	5q32	60082 bp
19	CSMD1	CUB and Sushi multiple domains 1	64478	8:2938585..4994416	Chromosome 8: 2,935,353-4,994,972	Q96PZ7	8p23.2	2059683 bp
20	CSMD2	CUB and Sushi multiple domains 2	114784	1:33519518..34165813	Chromosome 1: 33,513,999-34,165,842	Q7Z408	1p35.1	651844 bp
21	CTCF	CCCTC-binding factor	10664	16:67610833-67637872	Chromosome 16: 67,562,407-67,639,183	P49711	16q22.1	76779 bp
22	EBF1	early B-cell factor 1	1879	5:158699111-159099478	Chromosome 5: 158,695,916-159,099,761	Q9UH73	5q34	403848 bp
23	EED	embryonic ectoderm development	8726	86244384..86285420	Chromosome 11: 86,244,544-86,278,813	O75530	11q14.2	41037 bp
24	EGFR	epidermal growth factor receptor (erythroblastic leukemia viral (v-erb-b) oncogene homolog, avian)	1956	7:55019278-55205617	Chromosome 7: 55,019,021-55,211,628	P00533	7p12.3-p12.1	188307 bp
25	EP300	300 kd E1A-Binding protein gene	2033	22:41093005-41178956	Chromosome 22: 41,091,786-41,180,079	Q09472	22q13	87468 bp
26	ERBB2(HER2)	erb-b2 receptor tyrosine kinase 2	2064	17:39700239..39728044	Chromosome 17: 39,687,914-39,730,426	P04626	17q12	40579 bp
27	ERG	v-ets erythroblastosis virus E26 oncogene like (avian)	2078	21:38383403-38575700	Chromosome 21: 38,380,027-38,661,780	P1130	21q22.3	294785 bp
28	ETV6	ets variant gene 6 (TEL oncogene)	2120	12:11650128-11891046	Chromosome 12: 11,649,854-11,895,402	P41212	12p13	245802 bp
29	EZH2	enhancer of zeste homolog 2	2146	7:148807646-148847298	Chromosome 7: 148,807,383-148,884,321	Q15910	7q35-q36	77291 bp
30	FBXW7	F-box and WD-40 domain protein 7 (archipelago homolog, Drosophila)	55294	4:152322881-152411803	Chromosome 4: 152,321,259-152,536,101	Q969H0	4q31.3	214838 bp
31	FGFR1	fibroblast growth factor receptor 1	2260	8:38413628..38468834	Chromosome 8: 38,411,138-38,468,834	P11362	8p11.23	57697 bp
32	FLT3	fms-related tyrosine kinase 3	2322	13:28004052-28100510	Chromosome 13: 28,003,274-28,100,592	P36888	13q12	97319 bp
33	GATA1	GATA binding protein 1 (globin transcription factor 1)	2623	X:48791110-48794164	Chromosome X: 48,786,554-48,794,311	P15976	Xp11.23	7772 bp
34	GATA2	GATA binding protein 2	2624	3:128481019-128487031	Chromosome 3: 128,479,427-128,493,185	P23769	3q21.3	13766 bp
35	GATA3	GATA binding protein 3	2625	10:8055656-8074023	Chromosome 10: 8,053,604-8,075,198	P23771	10p15	29781 bp
36	GSTM1	glutathione S-transferase mu 1	2944	109687796..109693745	Chromosome 1: 109,687,814-109,709,039	P09488	1p13.3	5950 bp
37	HMCN1	hemicentin 1	83872	1:185734780..186189878	Chromosome 1: 185,734,551-186,190,949	Q96RW7	1q25.3-q31.1	456428 bp
38	IGF1R	insulin like growth factor 1 receptor	3480	15:98648539..98964530	Chromosome 15: 98,648,971-98,964,530	P08069	15q26.3	315992 bp
39	IGF2R	insulin like growth factor 2 receptor	3482	6:159969099..160111504	Chromosome 6: 159,969,099-160,113,507	P11717	6q25.3	142406 bp
40	IKZF1	IKAROS family zinc finger 1	10320	7:50319062-50400628	Chromosome 7: 50,304,124-50,405,101	Q13422	7p12.2	101649 bp
41	IKZF2	IKAROS Family Zinc Finger 2	22807	2:213007360..213148629	Chromosome 2: 212,999,691-213,152,427	Q9UKS7	2q34	153070 bp
42	IKZF3	IKAROS family zinc finger 3	22806	17:39757715..39864188	Chromosome 17: 39,757,715-39,864,188	Q9UKT9	17q12-q21.1	106474 bp
43	IL7R	interleukin 7 receptor	3575	5:35856978-35876486	Chromosome 5: 35,852,695-35,879,603	P16871	5p13	22729 bp
44	JAK1	Janus kinase 1	3716	1:64834562-64886264	Chromosome 1: 64,833,229-64,966,504	P23458	1p32.3-p31.3	234524 bp
45	JAK2	Janus kinase 2	3717	9:5021988-5126791	Chromosome 9: 4,984,390-5,128,183	O60674	9p24	143098 bp
46	JAK3	Janus kinase 3	3718	19:17826743-17844417	Chromosome 19: 17,824,780-17,848,071	P52333	19p13.1	23290 bp
47	KDM5C	lysine demethylase 5C	8242	(53159735..53225422, complement)	Chromosome X: 53,191,321-53,225,422	P41229	Xp11.22	65688 bp
48	KDM6A	lysine demethylase 6A	7403	44873175..45112612	Chromosome X: 44,873,177-45,112,602	O15550	Xp11.3	239438 bp
49	KMT2A	lysine methyltransferase 2A	4297	118436490..118526832	Chromosome 11: 118,436,490-118,526,832	Q03164	11q23.3	90343 bp
50	KMT2D	lysine (K)-specific methyltransferase 2D	8085	12:49021780-49055324	Chromosome 12: 49,018,975-49,059,774	O14686	12q13.12	41910 bp
51	KRAS	v-Ki-ras2 Kirsten rat sarcoma 2 viral oncogene homolog	3845	12:25209795-25245384	Chromosome 12: 25,204,789-25,250,936	P01116	12p12.1	47305 bp
52	MET	MET proto-oncogene, receptor tyrosine kinase	4233	7:116699085..116796124	Chromosome 7: 116,672,390-116,798,386	P08581	7q31.2	126028 bp
53	MSH6	mutS homolog 6	2956	47783082..47806953	Chromosome 11: 118,436,490-118,526,832	P52701	2p16.3	23872 bp
54	NCOR1	nuclear receptor corepressor 1	9611	17:16032296-16194569	Chromosome 17: 16,029,157-16,218,185	O75376	17p11.2	186653 bp
55	NF1	neurofibromatosis type 1 gene	4763	17:31095310-31374155	Chromosome 17: 31,094,927-31,382,116	P21359	17q12	282751 bp
56	NOTCH1	Notch homolog 1, translocation-associated (Drosophila) (TAN1)	4851	9:136496071-136545786	Chromosome 9: 136,494,444-136,545,862	P46531	9q34.3	51354 bp
57	NOTCH2	Notch homolog 2	4853	1:119915306-120069406	Chromosome 1: 119,911,553-120,069,626	Q04721	1p13-p11	161897 bp
58	NR1I2 (PAR1)	Nuclear receptor subfamily 1 group I member 2	8856	119780484..119818485	Chromosome 3: 119,780,484-119,818,485	O75469	3q13.33	38002 bp
59	NR3C1	Nuclear Receptor Subfamily 3 Group C Member 1	2908	143277931-143435512	Chromosome 5: 143,277,931-143,435,512	P04150	5q31.3	157582 bp
60	NRAS	Neuroblastoma RAS Viral Oncogene Homolog	4893	1:114708535-114716160	Chromosome 1: 114,704,469-114,716,894	P01111	1p13.2	12431 bp
61	NT5C1B	5'-nucleotidase, cytosolic I B	93034	18562871-18589580	Chromosome 2: 18,562,872-18,589,572	Q96P26	2p24.2	26710 bp
62	NT5C2	5'-nucleotidase, cytosolic II	22978	10:103089672-103174958	Chromosome 10: 103,088,017-103,193,306	P49902	10q24.32	105290 bp
63	NTRK3	neurotrophic tyrosine kinase, receptor, type 3	4916	15:87876935-88256153	Chromosome 15: 87,859,751-88,256,768	Q16288	15q25	397048 bp
64	PAG1	Phosphoprotein membrane Anchor with Glycosphingolipid microdomains 1	55824	80967810-81112068	Chromosome 8: 80,967,810-81,112,068	Q9NWQ8	8q21.13	144271 bp
65	PAX5	paired box gene 5 (B-cell lineage specific activator protein)	5079	9:36840560-37034031	Chromosome 9: 36,833,275-37,034,18	Q02548	9p13	202676 bp
66	PDGFRB	platelet derived growth factor receptor beta	5159	150113839-150155884	Chromosome 5: 150,113,837-150,155,872	P09619	5q32	42046 bp
67	PHF6	PHD finger protein 6	84295	X:134377618-134425330	Chromosome X: 134,373,253-134,428,791	Q8IWS0	Xq26.3	55481 bp
68	PRDM9	PR/SET domain 9	56979	23507609..23528597	Chromosome 5: 23,443,586-23,528,597	Q9NQV7	Xq26.2	20989 bp
69	PRPS1	Phosphoribosyl pyrophosphate synthetase 1	5631	X:106871872..106893275	Chromosome X: 106,871,737-106,894,256	P60891	Xq22.3	22603 bp
70	PTEN	phosphatase and tensin homolog gene	5728	10:87864470-87965472	Chromosome 10: 87,863,113-87,971,930	P60484	10q23.3	108493 bp
71	PTPN11	Protein Tyrosine Phosphatase, Non-Receptor Type 11	5781	12:112419112..112504764	Chromosome 12: 112,418,351-112,509,913	Q06124	12q24.13	91182 bp
72	PYGL	glycogen phosphorylase L	5836	(50905217..50944530, complement)	Chromosome 14: 50,857,891-50,944,736	P06737	14q22.1	39314 bp
73	RB1	retinoblastoma gene	5925	13:48303913-48480071	Chromosome 13: 48,303,751-48,481,986	P06400	13q14	178144 bp
74	RUNX1	runt-related transcription factor 1 (AML1)	861	21:34792135-35048899	Chromosome 21: 34,787,801-36,004,667	Q01196	21q22.3	261534 bp
75	SETD2	SET domain containing 2	29072	3:47017093-47123126	Chromosome 3: 47,016,429-47,163,967	Q9BYW2	3p21.31	147702 bp
76	SH2B3	SH2B adaptor protein 3	10019	12:111405106..111451623	Chromosome 12: 111,405,948-111,451,623	Q9UQQ2	12q24.12	46518 bp
77	SMC1A	Structural Maintenance Of Chromosomes 1A	8243	X:53380103..53422600	Chromosome X: 53,374,149-53,422,728	Q14683	Xp11.22	48580 bp
78	SMC3	Structural Maintenance Of Chromosomes 3	9126	10:110567817..110604302	Chromosome 10: 110,567,691-110,604,636	Q9UQE7	10q25.2	36944 bp
79	STAG1	Nuclear Protein Stromal Antigen 1	10274	3:136338254..136630898	Chromosome 3: 136,336,233-136,752,403	Q8WVM7	3q22.3	541032 bp
80	STAT5B	signal transducer and activator of transcription 5B	6777	17:42201738-42232127	Chromosome 17: 42,199,168-42,276,707	P51692	17q11.2	77284 bp
81	STIL	SCL/TAL1 interrupting locus	6491	1:47251136..47310319	Chromosome 1: 47,250,139-47,314,147	Q15468	1p33	64649 bp
82	SUZ12	SUZ12 polycomb repressive complex 2 subunit	23512	31937010..32001045	Chromosome 17: 31,937,018-32,001,045	Q15022	17q11.2	64036 bp
83	TBL1XR1	transducin (beta)-like 1 X-linked receptor 1	79718	3:177025498-177064977	Chromosome 3: 177,019,340-177,228,000	Q9BZK7	3q26.32	178003 bp
84	TCF3	transcription factor 3 (E2A immunoglobulin enhancer binding factors E12/E47)	6929	19:1611707-1650248	Chromosome 19: 1,609,290-1,652,605	P15923	19p13.3	43301 bp
85	TET2	tet methylcytosine dioxygenase 2	54790	105145875..105279803	Chromosome 4: 105,145,875-105,279,816	Q6N021	4q24	133929 bp
86	TP53	tumor protein p53	7157	17:7669609-7676594	Chromosome 17: 7,661,779-7,687,550	P04637	17p13	19149 bp
87	TP63	tumor protein p63	8626	3:189597115..189897279	Chromosome 3: 189,631,416-189,897,279	Q9H3D4	3q28	300165 bp
88	TP73	tumor protein p73	7161	1:3652565..3736201	Chromosome 1: 3,652,520-3,736,20	O15350	1p36.32	83637 bp
89	TSLP	thymic stromal lymphopoietin	85480	5:111070080..111078024	Chromosome 5: 111,070,062-111,078,024	Q969D	5q22.1	7945 bp
90	TUSC3	Tumor Suppressor Candidate 3	7991	8:15540431..15764218	Chromosome 8: 15,417,215-15,766,649	Q13454	8p22	226563 bp
91	TYK2	tyrosine kinase 2	7297	(10350528..10380572, complement)	Chromosome 19: 10,350,529-10,380,676	P29597	19p13.2	30045 bp
92	TYMS	thymidylate synthetase	7298	657604..673499	Chromosome 18: 657,604-673,578	P04818	18p11.32	15896 bp
93	VPREB1	V(Pre)B Protein	7441	22:22244814..22245337	Chromosome 22: 22,244,675-22,245,515	P12018	22q11.22	736 bp
94	WHSC1 (NSD2)	Wolf-Hirschhorn syndrome candidate 1(MMSET)	7468	4:1900655-1978909	Chromosome 4: 1,871,424-1,982,207	O96028	4p16.3	110851 bp
95	WT1	Wilms tumour 1 gene	7490	11:32389058-32435141	Chromosome 11: 32,387,775-32,435,630	P19544	11p13	47761 bp

## Sheet: Probe Design _Haloplex
Supplementary Table 3.2 Probe coordinates of the genes included in the targeted panel sequencing
browser position chr1:3567678-3569808
track name="Covered" description="Agilent HaloPlex - TMC cnacer redesign - Genomic regions expected to be amplified" color=0,128,0
chr1	3567677	3569808	TP73
chr1	3598488	3599134	TP73
chr1	3599172	3599343	TP73
chr1	3599354	3599664	TP73
chr1	3599667	3599971	TP73
chr1	3600051	3600191	TP73
chr1	3606906	3608044	TP73
chr1	3614059	3615296	TP73
chr1	3623338	3623496	TP73
chr1	3623637	3625180	TP73
chr1	3625186	3625457	TP73
chr1	3638023	3638118	TP73
chr1	3638171	3638266	TP73
chr1	3638280	3639015	TP73
chr1	3639878	3640270	TP73
chr1	3643322	3643417	TP73
chr1	3643559	3644895	TP73
chr1	3645184	3645281	TP73
chr1	3645458	3646005	TP73
chr1	3646015	3648332	TP73
chr1	3648473	3648572	TP73
chr1	3648771	3650349	TP73
chr1	3650363	3652898	TP73
chr1	3652908	3653003	TP73
chr1	27020874	27021230	ARID1A
chr1	27021236	27024145	ARID1A
chr1	27054011	27054657	ARID1A
chr1	27055590	27056555	ARID1A
chr1	27056610	27056705	ARID1A
chr1	27057329	27057424	ARID1A
chr1	27057467	27057990	ARID1A
chr1	27058034	27058536	ARID1A
chr1	27058699	27059679	ARID1A
chr1	27059921	27060017	ARID1A
chr1	27086788	27086883	ARID1A
chr1	27087071	27088173	ARID1A
chr1	27088276	27089164	ARID1A
chr1	27089179	27089278	ARID1A
chr1	27089360	27089521	ARID1A
chr1	27089550	27089628	ARID1A
chr1	27089632	27089978	ARID1A
chr1	27092463	27093405	ARID1A
chr1	27093560	27093655	ARID1A
chr1	27093670	27093769	ARID1A
chr1	27093920	27095088	ARID1A
chr1	27097333	27098162	ARID1A
chr1	27098488	27100288	ARID1A
chr1	27100297	27100654	ARID1A
chr1	27100678	27101757	ARID1A
chr1	27101768	27102011	ARID1A
chr1	27102012	27102346	ARID1A
chr1	27102354	27102639	ARID1A
chr1	27105241	27106509	ARID1A
chr1	27106519	27108684	ARID1A
chr1	27108688	27108864	ARID1A
chr1	27108976	27109072	ARID1A
chr1	33979145	33979240	CSMD2
chr1	33979309	33979488	CSMD2
chr1	33979494	33979642	CSMD2
chr1	33979652	33979841	CSMD2
chr1	33979926	33980021	CSMD2
chr1	33980031	33981766	CSMD2
chr1	33981793	33982359	CSMD2
chr1	33982404	33982612	CSMD2
chr1	33982638	33982733	CSMD2
chr1	33984398	33984587	CSMD2
chr1	33984740	33985299	CSMD2
chr1	33985303	33986080	CSMD2
chr1	33986611	33986708	CSMD2
chr1	33986819	33987522	CSMD2
chr1	33987544	33987642	CSMD2
chr1	33988720	33989326	CSMD2
chr1	33990038	33990133	CSMD2
chr1	33990302	33990982	CSMD2
chr1	33992360	33993036	CSMD2
chr1	33993043	33993162	CSMD2
chr1	33993171	33993388	CSMD2
chr1	33998030	33998219	CSMD2
chr1	33998406	33999791	CSMD2
chr1	34001793	34001888	CSMD2
chr1	34002080	34003501	CSMD2
chr1	34003513	34003611	CSMD2
chr1	34003752	34003870	CSMD2
chr1	34005776	34007235	CSMD2
chr1	34007845	34007940	CSMD2
chr1	34008016	34008748	CSMD2
chr1	34008899	34008994	CSMD2
chr1	34011058	34011154	CSMD2
chr1	34011298	34012285	CSMD2
chr1	34015330	34016141	CSMD2
chr1	34016284	34016380	CSMD2
chr1	34022929	34023024	CSMD2
chr1	34023094	34023889	CSMD2
chr1	34024358	34024506	CSMD2
chr1	34024545	34025010	CSMD2
chr1	34025030	34025414	CSMD2
chr1	34032676	34032771	CSMD2
chr1	34032918	34033675	CSMD2
chr1	34034302	34034397	CSMD2
chr1	34034430	34034530	CSMD2
chr1	34034566	34035165	CSMD2
chr1	34036492	34036750	CSMD2
chr1	34036760	34038627	CSMD2
chr1	34042361	34042459	CSMD2
chr1	34042468	34043152	CSMD2
chr1	34043218	34043467	CSMD2
chr1	34045690	34045863	CSMD2
chr1	34045936	34047036	CSMD2
chr1	34048589	34048684	CSMD2
chr1	34048838	34049728	CSMD2
chr1	34051807	34052980	CSMD2
chr1	34053044	34053385	CSMD2
chr1	34057345	34057605	CSMD2
chr1	34057607	34058246	CSMD2
chr1	34064041	34064272	CSMD2
chr1	34064340	34066879	CSMD2
chr1	34067020	34067138	CSMD2
chr1	34067371	34067850	CSMD2
chr1	34067860	34068295	CSMD2
chr1	34070220	34070384	CSMD2
chr1	34070451	34071726	CSMD2
chr1	34076166	34076460	CSMD2
chr1	34076461	34077140	CSMD2
chr1	34079607	34079728	CSMD2
chr1	34079813	34080376	CSMD2
chr1	34080382	34080556	CSMD2
chr1	34080563	34080746	CSMD2
chr1	34081898	34082072	CSMD2
chr1	34082140	34082810	CSMD2
chr1	34082858	34083205	CSMD2
chr1	34083210	34083629	CSMD2
chr1	34083837	34083932	CSMD2
chr1	34086996	34087164	CSMD2
chr1	34087253	34087912	CSMD2
chr1	34087918	34088079	CSMD2
chr1	34088098	34088241	CSMD2
chr1	34088393	34088733	CSMD2
chr1	34088757	34089369	CSMD2
chr1	34089399	34089494	CSMD2
chr1	34089900	34091129	CSMD2
chr1	34091159	34091254	CSMD2
chr1	34091808	34092376	CSMD2
chr1	34098709	34098804	CSMD2
chr1	34098833	34099629	CSMD2
chr1	34100438	34100607	CSMD2
chr1	34100620	34101404	CSMD2
chr1	34101717	34101917	CSMD2
chr1	34101931	34102516	CSMD2
chr1	34111943	34112607	CSMD2
chr1	34117495	34118310	CSMD2
chr1	34123000	34123095	CSMD2
chr1	34123244	34123497	CSMD2
chr1	34123527	34124103	CSMD2
chr1	34127814	34127909	CSMD2
chr1	34127925	34128021	CSMD2
chr1	34128080	34129008	CSMD2
chr1	34129054	34129149	CSMD2
chr1	34158088	34159080	CSMD2
chr1	34163849	34164914	CSMD2
chr1	34165902	34166603	CSMD2
chr1	34166798	34166897	CSMD2
chr1	34174329	34175452	CSMD2
chr1	34175513	34175612	CSMD2
chr1	34179840	34180760	CSMD2
chr1	34181360	34181459	CSMD2
chr1	34181580	34182528	CSMD2
chr1	34189512	34190049	CSMD2
chr1	34190059	34191379	CSMD2
chr1	34191643	34192598	CSMD2
chr1	34192599	34192722	CSMD2
chr1	34204239	34204334	CSMD2
chr1	34204437	34205436	CSMD2
chr1	34208557	34208652	CSMD2
chr1	34208741	34209544	CSMD2
chr1	34209655	34209753	CSMD2
chr1	34237183	34238660	CSMD2
chr1	34254055	34254237	CSMD2
chr1	34254240	34254628	CSMD2
chr1	34257557	34258628	CSMD2
chr1	34258672	34258767	CSMD2
chr1	34258776	34258871	CSMD2
chr1	34270098	34270614	CSMD2
chr1	34275600	34275748	CSMD2
chr1	34275983	34276836	CSMD2
chr1	34277869	34277965	CSMD2
chr1	34278194	34279026	CSMD2
chr1	34279237	34279884	CSMD2
chr1	34279992	34280169	CSMD2
chr1	34280585	34280681	CSMD2
chr1	34280717	34281398	CSMD2
chr1	34284816	34284913	CSMD2
chr1	34285036	34286473	CSMD2
chr1	34286506	34286601	CSMD2
chr1	34290825	34291727	CSMD2
chr1	34312085	34312763	CSMD2
chr1	34312766	34312861	CSMD2
chr1	34383155	34383254	CSMD2
chr1	34383404	34384212	CSMD2
chr1	34384291	34384386	CSMD2
chr1	34384399	34384494	CSMD2
chr1	34400829	34401972	CSMD2
chr1	34402078	34402174	CSMD2
chr1	34497987	34498508	CSMD2
chr1	34498530	34498625	CSMD2
chr1	34498754	34498849	CSMD2
chr1	34554070	34555176	CSMD2
chr1	34555219	34555314	CSMD2
chr1	34629959	34630055	CSMD2
chr1	34630218	34631478	CSMD2
chr1	34631480	34632800	CSMD2
chr1	47715342	47715526	STIL
chr1	47715551	47716337	STIL
chr1	47716343	47717893	STIL
chr1	47725689	47726441	STIL
chr1	47726443	47726538	STIL
chr1	47728120	47728219	STIL
chr1	47728399	47728987	STIL
chr1	47735074	47735325	STIL
chr1	47735333	47735735	STIL
chr1	47735749	47735844	STIL
chr1	47737321	47737416	STIL
chr1	47737431	47737969	STIL
chr1	47738025	47738375	STIL
chr1	47745181	47745280	STIL
chr1	47745292	47745387	STIL
chr1	47745388	47745725	STIL
chr1	47745739	47747190	STIL
chr1	47747557	47747828	STIL
chr1	47747902	47750142	STIL
chr1	47750165	47750260	STIL
chr1	47752885	47753055	STIL
chr1	47753189	47753643	STIL
chr1	47753739	47753834	STIL
chr1	47754899	47755023	STIL
chr1	47755049	47755436	STIL
chr1	47755493	47755588	STIL
chr1	47758875	47758970	STIL
chr1	47759007	47759495	STIL
chr1	47761147	47761740	STIL
chr1	47761763	47761904	STIL
chr1	47765234	47765455	STIL
chr1	47765463	47766097	STIL
chr1	47766138	47766233	STIL
chr1	47766465	47766560	STIL
chr1	47766613	47766708	STIL
chr1	47766731	47766936	STIL
chr1	47766944	47767555	STIL
chr1	47767704	47768097	STIL
chr1	47768118	47768341	STIL
chr1	47768381	47768476	STIL
chr1	47770099	47770209	STIL
chr1	47770306	47771003	STIL
chr1	47771099	47771194	STIL
chr1	47771203	47771301	STIL
chr1	47775314	47775410	STIL
chr1	47775701	47776024	STIL
chr1	47776031	47776430	STIL
chr1	47776436	47776585	STIL
chr1	47778510	47778692	STIL
chr1	47779160	47779271	STIL
chr1	47779278	47780282	STIL
chr1	47780319	47780490	STIL
chr1	47780500	47780595	STIL
chr1	65298701	65300395	JAK1
chr1	65300429	65302221	JAK1
chr1	65303309	65303679	JAK1
chr1	65303687	65304497	JAK1
chr1	65304615	65304710	JAK1
chr1	65305116	65305844	JAK1
chr1	65305896	65305994	JAK1
chr1	65306636	65307704	JAK1
chr1	65307776	65307871	JAK1
chr1	65309217	65311673	JAK1
chr1	65311738	65311833	JAK1
chr1	65312025	65314132	JAK1
chr1	65314188	65314286	JAK1
chr1	65315828	65315924	JAK1
chr1	65315966	65316319	JAK1
chr1	65316323	65316959	JAK1
chr1	65316972	65317100	JAK1
chr1	65317155	65317250	JAK1
chr1	65320619	65320714	JAK1
chr1	65320887	65321786	JAK1
chr1	65322603	65322698	JAK1
chr1	65322779	65323881	JAK1
chr1	65325088	65326017	JAK1
chr1	65329771	65329869	JAK1
chr1	65329885	65330186	JAK1
chr1	65330203	65331216	JAK1
chr1	65332057	65333186	JAK1
chr1	65333275	65333504	JAK1
chr1	65334565	65335622	JAK1
chr1	65338668	65338819	JAK1
chr1	65338889	65339415	JAK1
chr1	65339483	65339578	JAK1
chr1	65339646	65339741	JAK1
chr1	65341135	65342196	JAK1
chr1	65342206	65342462	JAK1
chr1	65344196	65344291	JAK1
chr1	65344305	65344878	JAK1
chr1	65344886	65345242	JAK1
chr1	65348466	65349443	JAK1
chr1	65349454	65349696	JAK1
chr1	65351205	65351300	JAK1
chr1	65351568	65351728	JAK1
chr1	65351839	65352108	JAK1
chr1	65352378	65352473	JAK1
chr1	65431556	65433722	JAK1
chr1	65433920	65434015	JAK1
chr1	110229176	110229271	GSTM1
chr1	110229344	110231152	GSTM1
chr1	110231227	110233464	GSTM1
chr1	110233497	110233820	GSTM1
chr1	110234119	110234214	GSTM1
chr1	110234241	110234308	GSTM1
chr1	110234382	110234575	GSTM1
chr1	110235811	110235979	GSTM1
chr1	110236029	110236666	GSTM1
chr1	110236684	110236779	GSTM1
chr1	110236927	110237023	GSTM1
chr1	110250789	110250914	GSTM1
chr1	110250932	110251304	GSTM1
chr1	110251343	110251448	GSTM1
chr1	110251516	110251579	GSTM1
chr1	115246567	115246662	NRAS
chr1	115246790	115247586	NRAS
chr1	115247587	115247821	NRAS
chr1	115247830	115251675	NRAS
chr1	115251939	115252432	NRAS
chr1	115252547	115252643	NRAS
chr1	115256087	115257005	NRAS
chr1	115257088	115257183	NRAS
chr1	115258380	115260689	NRAS
chr1	115260763	115260858	NRAS
chr1	120453838	120455229	NOTCH2
chr1	120455238	120458146	NOTCH2
chr1	120458153	120459641	NOTCH2
chr1	120459689	120459784	NOTCH2
chr1	120459846	120459942	NOTCH2
chr1	120460066	120461578	NOTCH2
chr1	120461594	120463166	NOTCH2
chr1	120463223	120463547	NOTCH2
chr1	120463674	120463770	NOTCH2
chr1	120463804	120463899	NOTCH2
chr1	120464042	120465036	NOTCH2
chr1	120465045	120465658	NOTCH2
chr1	120465810	120465905	NOTCH2
chr1	120466028	120466278	NOTCH2
chr1	120466282	120467175	NOTCH2
chr1	120467190	120467341	NOTCH2
chr1	120467530	120468683	NOTCH2
chr1	120468779	120469618	NOTCH2
chr1	120471031	120472447	NOTCH2
chr1	120477202	120477298	NOTCH2
chr1	120477456	120477747	NOTCH2
chr1	120477755	120478225	NOTCH2
chr1	120478232	120478631	NOTCH2
chr1	120478637	120478736	NOTCH2
chr1	120479502	120479601	NOTCH2
chr1	120479680	120480223	NOTCH2
chr1	120480238	120480943	NOTCH2
chr1	120482791	120482928	NOTCH2
chr1	120482933	120483692	NOTCH2
chr1	120483764	120484647	NOTCH2
chr1	120484653	120484748	NOTCH2
chr1	120490592	120490687	NOTCH2
chr1	120490802	120492035	NOTCH2
chr1	120492055	120492150	NOTCH2
chr1	120492301	120493711	NOTCH2
chr1	120495631	120495726	NOTCH2
chr1	120495985	120496699	NOTCH2
chr1	120496912	120497007	NOTCH2
chr1	120497010	120497105	NOTCH2
chr1	120497141	120498272	NOTCH2
chr1	120501622	120501717	NOTCH2
chr1	120501727	120502472	NOTCH2
chr1	120505625	120505792	NOTCH2
chr1	120505902	120506073	NOTCH2
chr1	120506162	120506295	NOTCH2
chr1	120506303	120506728	NOTCH2
chr1	120507685	120507780	NOTCH2
chr1	120507807	120508350	NOTCH2
chr1	120508353	120508720	NOTCH2
chr1	120508733	120509333	NOTCH2
chr1	120509358	120509453	NOTCH2
chr1	120509577	120509673	NOTCH2
chr1	120509785	120510422	NOTCH2
chr1	120510446	120511146	NOTCH2
chr1	120511353	120511448	NOTCH2
chr1	120511765	120512466	NOTCH2
chr1	120512483	120512890	NOTCH2
chr1	120512965	120513060	NOTCH2
chr1	120529305	120529400	NOTCH2
chr1	120529456	120529975	NOTCH2
chr1	120529996	120530093	NOTCH2
chr1	120534836	120534931	NOTCH2
chr1	120534973	120535068	NOTCH2
chr1	120535086	120536450	NOTCH2
chr1	120536452	120536563	NOTCH2
chr1	120536584	120537119	NOTCH2
chr1	120537129	120537224	NOTCH2
chr1	120537287	120537993	NOTCH2
chr1	120538003	120538171	NOTCH2
chr1	120538225	120538320	NOTCH2
chr1	120538340	120538499	NOTCH2
chr1	120538500	120539032	NOTCH2
chr1	120539039	120539244	NOTCH2
chr1	120539248	120539883	NOTCH2
chr1	120539888	120540313	NOTCH2
chr1	120547847	120547971	NOTCH2
chr1	120547979	120548079	NOTCH2
chr1	120548092	120548549	NOTCH2
chr1	120572290	120572600	NOTCH2
chr1	120572606	120572876	NOTCH2
chr1	120572921	120573114	NOTCH2
chr1	120593588	120593888	NOTCH2
chr1	120593960	120594684	NOTCH2
chr1	120594693	120594840	NOTCH2
chr1	120596142	120596240	NOTCH2
chr1	120596429	120596791	NOTCH2
chr1	120596800	120596861	NOTCH2
chr1	120596863	120597126	NOTCH2
chr1	120611788	120612207	NOTCH2
chr1	120612209	120614442	NOTCH2
chr1	120614447	120614875	NOTCH2
chr1	120614903	120615320	NOTCH2
chr1	120615330	120615528	NOTCH2
chr1	120615535	120615782	NOTCH2
chr1	120615820	120616980	NOTCH2
chr1	120617023	120617215	NOTCH2
chr1	120617281	120618051	NOTCH2
chr1	120618105	120618380	NOTCH2
chr1	120618381	120619142	NOTCH2
chr1	120619152	120619308	NOTCH2
chr1	120619311	120620240	NOTCH2
chr1	120620250	120620447	NOTCH2
chr1	120620673	120621609	NOTCH2
chr1	120621615	120623271	NOTCH2
chr1	120623292	120623355	NOTCH2
chr1	120623356	120623451	NOTCH2
chr1	120623484	120623756	NOTCH2
chr1	120623757	120624186	NOTCH2
chr1	120624194	120625450	NOTCH2
chr1	120625451	120625711	NOTCH2
chr1	120625935	120626418	NOTCH2
chr1	120626428	120626968	NOTCH2
chr1	120627012	120627334	NOTCH2
chr1	120627340	120627606	NOTCH2
chr1	120627616	120627948	NOTCH2
chr1	120627969	120628803	NOTCH2
chr1	120628827	120630072	NOTCH2
chr1	120630076	120631266	NOTCH2
chr1	120631684	120631780	NOTCH2
chr1	120632013	120633210	NOTCH2
chr1	120633255	120633829	NOTCH2
chr1	120634217	120635639	NOTCH2
chr1	120635649	120636379	NOTCH2
chr1	120636385	120636748	NOTCH2
chr1	120636751	120636828	NOTCH2
chr1	120636838	120636933	NOTCH2
chr1	120636955	120637050	NOTCH2
chr1	120637060	120637776	NOTCH2
chr1	120637777	120638520	NOTCH2
chr1	120638595	120638732	NOTCH2
chr1	120638798	120640272	NOTCH2
chr1	120640338	120640433	NOTCH2
chr1	120640522	120641135	NOTCH2
chr1	120641191	120641286	NOTCH2
chr1	185702454	185703862	HMCN1
chr1	185703870	185704548	HMCN1
chr1	185704632	185704727	HMCN1
chr1	185815017	185815500	HMCN1
chr1	185832829	185832925	HMCN1
chr1	185833139	185833367	HMCN1
chr1	185833377	185833994	HMCN1
chr1	185834032	185834127	HMCN1
chr1	185834280	185834376	HMCN1
chr1	185834510	185834723	HMCN1
chr1	185834745	185834840	HMCN1
chr1	185834850	185835171	HMCN1
chr1	185835214	185835358	HMCN1
chr1	185877901	185877996	HMCN1
chr1	185878064	185878775	HMCN1
chr1	185880356	185880901	HMCN1
chr1	185880921	185881242	HMCN1
chr1	185881286	185881392	HMCN1
chr1	185881470	185881565	HMCN1
chr1	185891025	185891120	HMCN1
chr1	185891179	185891876	HMCN1
chr1	185892401	185892990	HMCN1
chr1	185893137	185893232	HMCN1
chr1	185893657	185893819	HMCN1
chr1	185893861	185894666	HMCN1
chr1	185897323	185898162	HMCN1
chr1	185898197	185898306	HMCN1
chr1	185902026	185902121	HMCN1
chr1	185902130	185902225	HMCN1
chr1	185902242	185902503	HMCN1
chr1	185902549	185903423	HMCN1
chr1	185925795	185925894	HMCN1
chr1	185925997	185926547	HMCN1
chr1	185926568	185926752	HMCN1
chr1	185931380	185932750	HMCN1
chr1	185932759	185933305	HMCN1
chr1	185933392	185933694	HMCN1
chr1	185934513	185935344	HMCN1
chr1	185935450	185935545	HMCN1
chr1	185938927	185939022	HMCN1
chr1	185939086	185939888	HMCN1
chr1	185940005	185940100	HMCN1
chr1	185946666	185947520	HMCN1
chr1	185949783	185950356	HMCN1
chr1	185950888	185951033	HMCN1
chr1	185951117	185951821	HMCN1
chr1	185952853	185952949	HMCN1
chr1	185952996	185953852	HMCN1
chr1	185953869	185953965	HMCN1
chr1	185956046	185956856	HMCN1
chr1	185958178	185958273	HMCN1
chr1	185958344	185958485	HMCN1
chr1	185958548	185959818	HMCN1
chr1	185959916	185960058	HMCN1
chr1	185961794	185961892	HMCN1
chr1	185961907	185962002	HMCN1
chr1	185962102	185962674	HMCN1
chr1	185962684	185962941	HMCN1
chr1	185963135	185963230	HMCN1
chr1	185963880	185964555	HMCN1
chr1	185964575	185964670	HMCN1
chr1	185964748	185964846	HMCN1
chr1	185965708	185965804	HMCN1
chr1	185966058	185966191	HMCN1
chr1	185966380	185967109	HMCN1
chr1	185968713	185968821	HMCN1
chr1	185968865	185969166	HMCN1
chr1	185969167	185969734	HMCN1
chr1	185969791	185969886	HMCN1
chr1	185969951	185970219	HMCN1
chr1	185970235	185971041	HMCN1
chr1	185971053	185971148	HMCN1
chr1	185971158	185971408	HMCN1
chr1	185971463	185971558	HMCN1
chr1	185972166	185972261	HMCN1
chr1	185972347	185973116	HMCN1
chr1	185973171	185973464	HMCN1
chr1	185975481	185975576	HMCN1
chr1	185975597	185975696	HMCN1
chr1	185975787	185976030	HMCN1
chr1	185976132	185976936	HMCN1
chr1	185983950	185985535	HMCN1
chr1	185985542	185986596	HMCN1
chr1	185986668	185986763	HMCN1
chr1	185986772	185986915	HMCN1
chr1	185986922	185987019	HMCN1
chr1	185987033	185987873	HMCN1
chr1	185988225	185988324	HMCN1
chr1	185988342	185989010	HMCN1
chr1	185989078	185989174	HMCN1
chr1	185991804	185991899	HMCN1
chr1	185991927	185992518	HMCN1
chr1	185992580	185992738	HMCN1
chr1	185992769	185992864	HMCN1
chr1	186007020	186007223	HMCN1
chr1	186007269	186007364	HMCN1
chr1	186007374	186007645	HMCN1
chr1	186007654	186007749	HMCN1
chr1	186007817	186008614	HMCN1
chr1	186008624	186008766	HMCN1
chr1	186008769	186009007	HMCN1
chr1	186009010	186009258	HMCN1
chr1	186009272	186009367	HMCN1
chr1	186009411	186009506	HMCN1
chr1	186009718	186010574	HMCN1
chr1	186010584	186010679	HMCN1
chr1	186010825	186010931	HMCN1
chr1	186014356	186014675	HMCN1
chr1	186014714	186015145	HMCN1
chr1	186017313	186017585	HMCN1
chr1	186017632	186017727	HMCN1
chr1	186017785	186018403	HMCN1
chr1	186021919	186022223	HMCN1
chr1	186022250	186022475	HMCN1
chr1	186022543	186023382	HMCN1
chr1	186024062	186024906	HMCN1
chr1	186024923	186025205	HMCN1
chr1	186025222	186025317	HMCN1
chr1	186025944	186026819	HMCN1
chr1	186026879	186026974	HMCN1
chr1	186030492	186030588	HMCN1
chr1	186030814	186031288	HMCN1
chr1	186031304	186031739	HMCN1
chr1	186034054	186034212	HMCN1
chr1	186034233	186034761	HMCN1
chr1	186036519	186036614	HMCN1
chr1	186036626	186036891	HMCN1
chr1	186036976	186037402	HMCN1
chr1	186037424	186037519	HMCN1
chr1	186038455	186038578	HMCN1
chr1	186038598	186039125	HMCN1
chr1	186039133	186039321	HMCN1
chr1	186039325	186039491	HMCN1
chr1	186039521	186040077	HMCN1
chr1	186040108	186040462	HMCN1
chr1	186040475	186040570	HMCN1
chr1	186043594	186044132	HMCN1
chr1	186044892	186044987	HMCN1
chr1	186045138	186045895	HMCN1
chr1	186046773	186046916	HMCN1
chr1	186046965	186047813	HMCN1
chr1	186050169	186050816	HMCN1
chr1	186051798	186052235	HMCN1
chr1	186052382	186052477	HMCN1
chr1	186055022	186055885	HMCN1
chr1	186055917	186058061	HMCN1
chr1	186058075	186058243	HMCN1
chr1	186059471	186060158	HMCN1
chr1	186060161	186060478	HMCN1
chr1	186060501	186060596	HMCN1
chr1	186061708	186061806	HMCN1
chr1	186061913	186062373	HMCN1
chr1	186062380	186062426	HMCN1
chr1	186062492	186062727	HMCN1
chr1	186062771	186062866	HMCN1
chr1	186062963	186063170	HMCN1
chr1	186063188	186063821	HMCN1
chr1	186063870	186063968	HMCN1
chr1	186063975	186064769	HMCN1
chr1	186072082	186072263	HMCN1
chr1	186072273	186073125	HMCN1
chr1	186075675	186076221	HMCN1
chr1	186076259	186076354	HMCN1
chr1	186077254	186078110	HMCN1
chr1	186078174	186078270	HMCN1
chr1	186081428	186081675	HMCN1
chr1	186081734	186082245	HMCN1
chr1	186082253	186082479	HMCN1
chr1	186082824	186083524	HMCN1
chr1	186083534	186084758	HMCN1
chr1	186084857	186085007	HMCN1
chr1	186085753	186086870	HMCN1
chr1	186086878	186086973	HMCN1
chr1	186087041	186087222	HMCN1
chr1	186088081	186089667	HMCN1
chr1	186091648	186092677	HMCN1
chr1	186092795	186092890	HMCN1
chr1	186094043	186094138	HMCN1
chr1	186094356	186095010	HMCN1
chr1	186097085	186097648	HMCN1
chr1	186098791	186100009	HMCN1
chr1	186100025	186100190	HMCN1
chr1	186100200	186100297	HMCN1
chr1	186100306	186100404	HMCN1
chr1	186100455	186100550	HMCN1
chr1	186100996	186101196	HMCN1
chr1	186101200	186101798	HMCN1
chr1	186101955	186102050	HMCN1
chr1	186105419	186105515	HMCN1
chr1	186105583	186107449	HMCN1
chr1	186107504	186107603	HMCN1
chr1	186113116	186114179	HMCN1
chr1	186114193	186115379	HMCN1
chr1	186115556	186115651	HMCN1
chr1	186120113	186120338	HMCN1
chr1	186120394	186121190	HMCN1
chr1	186121228	186121323	HMCN1
chr1	186121375	186121470	HMCN1
chr1	186121639	186122242	HMCN1
chr1	186122253	186123386	HMCN1
chr1	186123402	186123501	HMCN1
chr1	186123557	186123653	HMCN1
chr1	186133852	186134797	HMCN1
chr1	186134825	186136405	HMCN1
chr1	186140098	186140193	HMCN1
chr1	186140239	186140798	HMCN1
chr1	186140812	186141350	HMCN1
chr1	186143214	186144194	HMCN1
chr1	186144203	186144301	HMCN1
chr1	186147118	186148017	HMCN1
chr1	186148081	186148378	HMCN1
chr1	186150748	186151263	HMCN1
chr1	186151269	186151428	HMCN1
chr1	186151438	186151539	HMCN1
chr1	186156589	186157314	HMCN1
chr1	186157320	186157537	HMCN1
chr1	186157717	186157812	HMCN1
chr1	186158078	186158200	HMCN1
chr1	186158221	186160375	HMCN1
chr1	186160524	186160619	HMCN1
chr2	18736338	18736959	NT5C1B
chr2	18736969	18737178	NT5C1B
chr2	18737180	18737413	NT5C1B
chr2	18743734	18743829	NT5C1B
chr2	18743864	18745736	NT5C1B
chr2	18756877	18757956	NT5C1B
chr2	18757972	18758618	NT5C1B
chr2	18763764	18764552	NT5C1B
chr2	18764711	18765103	NT5C1B
chr2	18765122	18765903	NT5C1B
chr2	18765913	18766923	NT5C1B
chr2	18766934	18767029	NT5C1B
chr2	18767039	18768469	NT5C1B
chr2	18768479	18769149	NT5C1B
chr2	18770262	18770360	NT5C1B
chr2	18770384	18770479	NT5C1B
chr2	18770518	18771038	NT5C1B
chr2	18771048	18773291	NT5C1B
chr2	29414988	29415083	ALK
chr2	29415123	29415222	ALK
chr2	29415329	29415754	ALK
chr2	29415758	29415953	ALK
chr2	29415955	29417060	ALK
chr2	29418919	29419086	ALK
chr2	29419125	29419503	ALK
chr2	29419512	29420561	ALK
chr2	29420578	29420852	ALK
chr2	29420873	29420968	ALK
chr2	29429628	29430744	ALK
chr2	29430778	29431191	ALK
chr2	29432090	29432185	ALK
chr2	29432213	29432308	ALK
chr2	29432345	29433262	ALK
chr2	29436590	29437277	ALK
chr2	29443254	29443349	ALK
chr2	29443401	29444500	ALK
chr2	29444517	29444612	ALK
chr2	29444812	29446590	ALK
chr2	29447717	29447812	ALK
chr2	29448051	29448834	ALK
chr2	29449392	29450955	ALK
chr2	29450973	29451068	ALK
chr2	29451552	29452220	ALK
chr2	29452296	29452438	ALK
chr2	29454997	29455634	ALK
chr2	29455759	29455859	ALK
chr2	29456280	29456812	ALK
chr2	29456895	29457141	ALK
chr2	29462164	29462900	ALK
chr2	29462972	29463068	ALK
chr2	29473265	29473360	ALK
chr2	29473426	29474625	ALK
chr2	29497308	29497403	ALK
chr2	29497452	29498073	ALK
chr2	29498077	29498768	ALK
chr2	29508504	29508599	ALK
chr2	29508710	29508805	ALK
chr2	29508873	29510172	ALK
chr2	29510334	29510433	ALK
chr2	29519550	29520149	ALK
chr2	29520236	29520401	ALK
chr2	29540595	29540690	ALK
chr2	29540844	29541773	ALK
chr2	29541782	29542460	ALK
chr2	29543120	29543263	ALK
chr2	29543338	29544170	ALK
chr2	29544406	29544502	ALK
chr2	29550962	29551724	ALK
chr2	29606119	29606214	ALK
chr2	29606241	29606336	ALK
chr2	29606365	29607065	ALK
chr2	29754237	29755468	ALK
chr2	29917312	29917410	ALK
chr2	29917474	29918463	ALK
chr2	29940123	29940218	ALK
chr2	29940255	29940551	ALK
chr2	29940554	29940787	ALK
chr2	29940795	29940941	ALK
chr2	30142511	30145687	ALK
chr2	48009269	48011817	MSH6
chr2	48011824	48011919	MSH6
chr2	48017330	48017429	MSH6
chr2	48017510	48017682	MSH6
chr2	48017697	48018402	MSH6
chr2	48022767	48022988	MSH6
chr2	48022992	48023475	MSH6
chr2	48025713	48026153	MSH6
chr2	48026163	48028601	MSH6
chr2	48028636	48028731	MSH6
chr2	48030091	48030186	MSH6
chr2	48030226	48031185	MSH6
chr2	48031220	48031315	MSH6
chr2	48031417	48031530	MSH6
chr2	48031629	48032360	MSH6
chr2	48032387	48032482	MSH6
chr2	48032610	48034826	MSH6
chr2	48034831	48035649	MSH6
chr2	48035658	48037470	MSH6
chr2	48037486	48037667	MSH6
chr2	213863839	213863934	IKZF2
chr2	213864034	213864953	IKZF2
chr2	213864962	213865366	IKZF2
chr2	213865422	213866569	IKZF2
chr2	213866580	213868792	IKZF2
chr2	213868802	213870762	IKZF2
chr2	213870796	213870901	IKZF2
chr2	213870908	213872869	IKZF2
chr2	213878001	213879232	IKZF2
chr2	213879238	213880360	IKZF2
chr2	213881315	213881410	IKZF2
chr2	213881413	213882074	IKZF2
chr2	213885943	213886038	IKZF2
chr2	213886138	213887299	IKZF2
chr2	213913921	213914016	IKZF2
chr2	213914034	213915125	IKZF2
chr2	213921135	213922181	IKZF2
chr2	213922257	213922403	IKZF2
chr2	213943158	213943255	IKZF2
chr2	213943368	213943843	IKZF2
chr2	213943955	213944050	IKZF2
chr2	213945434	213946393	IKZF2
chr2	213946473	213946568	IKZF2
chr2	213962194	213962289	IKZF2
chr2	213962359	213962717	IKZF2
chr2	213962744	213962989	IKZF2
chr2	213963065	213963161	IKZF2
chr2	214011773	214011868	IKZF2
chr2	214011923	214012625	IKZF2
chr2	214012643	214012941	IKZF2
chr2	214013022	214013776	IKZF2
chr2	214014486	214015055	IKZF2
chr2	214015065	214015480	IKZF2
chr2	214015520	214015658	IKZF2
chr2	214015770	214016538	IKZF2
chr2	214016631	214016997	IKZF2
chr2	214017007	214018558	IKZF2
chr2	214018643	214018826	IKZF2
chr3	47057495	47057590	SETD2
chr3	47057640	47059703	SETD2
chr3	47060861	47061572	SETD2
chr3	47061597	47061781	SETD2
chr3	47078725	47078879	SETD2
chr3	47078900	47078995	SETD2
chr3	47079005	47079100	SETD2
chr3	47079140	47079553	SETD2
chr3	47083908	47084100	SETD2
chr3	47084101	47084196	SETD2
chr3	47084222	47084446	SETD2
chr3	47087750	47087852	SETD2
chr3	47087854	47087978	SETD2
chr3	47087988	47088105	SETD2
chr3	47088115	47088245	SETD2
chr3	47088255	47088369	SETD2
chr3	47088386	47088722	SETD2
chr3	47089006	47089101	SETD2
chr3	47098062	47099382	SETD2
chr3	47103326	47104120	SETD2
chr3	47104125	47104220	SETD2
chr3	47105340	47105435	SETD2
chr3	47105463	47106188	SETD2
chr3	47106197	47106590	SETD2
chr3	47107922	47108017	SETD2
chr3	47108144	47108825	SETD2
chr3	47121668	47121763	SETD2
chr3	47121782	47122989	SETD2
chr3	47123108	47123204	SETD2
chr3	47124932	47125217	SETD2
chr3	47125224	47126027	SETD2
chr3	47126114	47126209	SETD2
chr3	47127306	47128306	SETD2
chr3	47128362	47128461	SETD2
chr3	47129371	47129881	SETD2
chr3	47130015	47130110	SETD2
chr3	47138872	47138972	SETD2
chr3	47139022	47139398	SETD2
chr3	47139408	47139637	SETD2
chr3	47139647	47139882	SETD2
chr3	47139933	47140027	SETD2
chr3	47142609	47143389	SETD2
chr3	47143476	47143571	SETD2
chr3	47144450	47144740	SETD2
chr3	47144760	47145169	SETD2
chr3	47145366	47145461	SETD2
chr3	47147483	47147830	SETD2
chr3	47147861	47147957	SETD2
chr3	47155233	47155354	SETD2
chr3	47155356	47155886	SETD2
chr3	47155889	47155984	SETD2
chr3	47157589	47157684	SETD2
chr3	47157759	47158578	SETD2
chr3	47160709	47160862	SETD2
chr3	47160873	47161009	SETD2
chr3	47161043	47161151	SETD2
chr3	47161180	47161350	SETD2
chr3	47161366	47161602	SETD2
chr3	47161612	47164112	SETD2
chr3	47164138	47164325	SETD2
chr3	47164330	47165059	SETD2
chr3	47165065	47166241	SETD2
chr3	47166244	47166341	SETD2
chr3	47166405	47166500	SETD2
chr3	47167681	47167776	SETD2
chr3	47167902	47168452	SETD2
chr3	47168516	47168611	SETD2
chr3	47168685	47168780	SETD2
chr3	47204798	47204950	SETD2
chr3	47204960	47206831	SETD2
chr3	119497825	119498011	NR1I2
chr3	119498069	119498561	NR1I2
chr3	119498602	119499562	NR1I2
chr3	119499567	119501051	NR1I2
chr3	119501067	119501191	NR1I2
chr3	119501258	119501975	NR1I2
chr3	119525757	119525862	NR1I2
chr3	119525874	119526554	NR1I2
chr3	119526576	119526766	NR1I2
chr3	119528522	119528621	NR1I2
chr3	119528685	119530732	NR1I2
chr3	119530742	119532146	NR1I2
chr3	119532152	119532269	NR1I2
chr3	119533644	119535116	NR1I2
chr3	119535545	119537311	NR1I2
chr3	119537313	119537555	NR1I2
chr3	128197981	128198076	GATA2
chr3	128198116	128199293	GATA2
chr3	128199323	128199582	GATA2
chr3	128199583	128200475	GATA2
chr3	128200524	128201148	GATA2
chr3	128201171	128201278	GATA2
chr3	128202265	128202360	GATA2
chr3	128202410	128203060	GATA2
chr3	128203194	128203321	GATA2
chr3	128204027	128204126	GATA2
chr3	128204157	128204398	GATA2
chr3	128204414	128207619	GATA2
chr3	128208624	128208720	GATA2
chr3	128208859	128209561	GATA2
chr3	128209696	128209791	GATA2
chr3	128210458	128210553	GATA2
chr3	128210573	128210668	GATA2
chr3	128210675	128212964	GATA2
chr3	128212969	128213445	GATA2
chr3	136054831	136054927	STAG1
chr3	136054934	136057404	STAG1
chr3	136058623	136058718	STAG1
chr3	136058950	136059150	STAG1
chr3	136059244	136059845	STAG1
chr3	136059920	136060015	STAG1
chr3	136060071	136060584	STAG1
chr3	136060706	136060801	STAG1
chr3	136062251	136063041	STAG1
chr3	136063169	136063268	STAG1
chr3	136067450	136068118	STAG1
chr3	136068124	136068343	STAG1
chr3	136068407	136068722	STAG1
chr3	136068866	136068961	STAG1
chr3	136076558	136076917	STAG1
chr3	136076931	136077102	STAG1
chr3	136077621	136077848	STAG1
chr3	136077863	136078045	STAG1
chr3	136078068	136078262	STAG1
chr3	136081675	136081770	STAG1
chr3	136081945	136082336	STAG1
chr3	136082345	136082569	STAG1
chr3	136085485	136085592	STAG1
chr3	136085643	136086109	STAG1
chr3	136086239	136086334	STAG1
chr3	136087573	136087668	STAG1
chr3	136087696	136088245	STAG1
chr3	136088279	136088379	STAG1
chr3	136096341	136096912	STAG1
chr3	136096938	136097033	STAG1
chr3	136117253	136117650	STAG1
chr3	136117656	136117833	STAG1
chr3	136118115	136118214	STAG1
chr3	136136036	136136968	STAG1
chr3	136136977	136137072	STAG1
chr3	136137085	136137180	STAG1
chr3	136139511	136139606	STAG1
chr3	136139742	136140475	STAG1
chr3	136140484	136140579	STAG1
chr3	136140701	136140796	STAG1
chr3	136140964	136141924	STAG1
chr3	136141934	136142280	STAG1
chr3	136142304	136142399	STAG1
chr3	136142441	136142536	STAG1
chr3	136151784	136152080	STAG1
chr3	136152186	136152772	STAG1
chr3	136161719	136161892	STAG1
chr3	136161921	136162519	STAG1
chr3	136162529	136162682	STAG1
chr3	136170657	136170847	STAG1
chr3	136170911	136171128	STAG1
chr3	136183461	136183556	STAG1
chr3	136183615	136184058	STAG1
chr3	136190616	136190713	STAG1
chr3	136190742	136190910	STAG1
chr3	136191049	136191517	STAG1
chr3	136191880	136191975	STAG1
chr3	136192155	136192321	STAG1
chr3	136192331	136192714	STAG1
chr3	136195805	136196661	STAG1
chr3	136218204	136218995	STAG1
chr3	136219035	136219314	STAG1
chr3	136219344	136219702	STAG1
chr3	136221056	136221183	STAG1
chr3	136221262	136221988	STAG1
chr3	136236493	136237623	STAG1
chr3	136237631	136237726	STAG1
chr3	136237844	136237939	STAG1
chr3	136239949	136240599	STAG1
chr3	136240626	136240721	STAG1
chr3	136240731	136240826	STAG1
chr3	136260590	136261428	STAG1
chr3	136261483	136261580	STAG1
chr3	136261595	136261691	STAG1
chr3	136287212	136287307	STAG1
chr3	136287385	136287504	STAG1
chr3	136287509	136288240	STAG1
chr3	136305347	136305940	STAG1
chr3	136305957	136306055	STAG1
chr3	136309795	136310757	STAG1
chr3	136310906	136311005	STAG1
chr3	136322803	136323652	STAG1
chr3	136341373	136341468	STAG1
chr3	136341629	136341834	STAG1
chr3	136341845	136342260	STAG1
chr3	136342404	136342501	STAG1
chr3	136349451	136349706	STAG1
chr3	136349716	136349864	STAG1
chr3	136349881	136350161	STAG1
chr3	136350285	136350469	STAG1
chr3	136470631	136472555	STAG1
chr3	136472574	136472670	STAG1
chr3	176736704	176740154	TBL1XR1
chr3	176740164	176740308	TBL1XR1
chr3	176740318	176742192	TBL1XR1
chr3	176742198	176742323	TBL1XR1
chr3	176742333	176742719	TBL1XR1
chr3	176742725	176745356	TBL1XR1
chr3	176745363	176746105	TBL1XR1
chr3	176746107	176746204	TBL1XR1
chr3	176750300	176750644	TBL1XR1
chr3	176750683	176751140	TBL1XR1
chr3	176751479	176751664	TBL1XR1
chr3	176751686	176751839	TBL1XR1
chr3	176751950	176752024	TBL1XR1
chr3	176752034	176752162	TBL1XR1
chr3	176752319	176752695	TBL1XR1
chr3	176755355	176755450	TBL1XR1
chr3	176755520	176755618	TBL1XR1
chr3	176755676	176756385	TBL1XR1
chr3	176756390	176756676	TBL1XR1
chr3	176763481	176763576	TBL1XR1
chr3	176763595	176763806	TBL1XR1
chr3	176763866	176764175	TBL1XR1
chr3	176764210	176764602	TBL1XR1
chr3	176764728	176765355	TBL1XR1
chr3	176765395	176765723	TBL1XR1
chr3	176765932	176766027	TBL1XR1
chr3	176767275	176767370	TBL1XR1
chr3	176767406	176767501	TBL1XR1
chr3	176767516	176768819	TBL1XR1
chr3	176768898	176769869	TBL1XR1
chr3	176771066	176771810	TBL1XR1
chr3	176771819	176772064	TBL1XR1
chr3	176782465	176782828	TBL1XR1
chr3	176796112	176796237	TBL1XR1
chr3	176796239	176796596	TBL1XR1
chr3	176796768	176796947	TBL1XR1
chr3	176797060	176797155	TBL1XR1
chr3	176797239	176798020	TBL1XR1
chr3	176804483	176804578	TBL1XR1
chr3	176804624	176804940	TBL1XR1
chr3	176805009	176805214	TBL1XR1
chr3	176808667	176809297	TBL1XR1
chr3	176809304	176809429	TBL1XR1
chr3	176816123	176816436	TBL1XR1
chr3	176816452	176816664	TBL1XR1
chr3	176816697	176816866	TBL1XR1
chr3	176848717	176848911	TBL1XR1
chr3	176848993	176849562	TBL1XR1
chr3	176878154	176878249	TBL1XR1
chr3	176878337	176878826	TBL1XR1
chr3	176878872	176879244	TBL1XR1
chr3	176913695	176915444	TBL1XR1
chr3	176915454	176915597	TBL1XR1
chr3	176915603	176915876	TBL1XR1
chr3	176915883	176916043	TBL1XR1
chr3	176916049	176916195	TBL1XR1
chr3	176916290	176916456	TBL1XR1
chr3	176916506	176916601	TBL1XR1
chr3	189347517	189347613	TP63
chr3	189347752	189348972	TP63
chr3	189348973	189349592	TP63
chr3	189454911	189455006	TP63
chr3	189455117	189455901	TP63
chr3	189455903	189455999	TP63
chr3	189456089	189456700	TP63
chr3	189507199	189507294	TP63
chr3	189507302	189507721	TP63
chr3	189507728	189508062	TP63
chr3	189508135	189508230	TP63
chr3	189525613	189525708	TP63
chr3	189525816	189526758	TP63
chr3	189561464	189561642	TP63
chr3	189561688	189562047	TP63
chr3	189562134	189562406	TP63
chr3	189562447	189562542	TP63
chr3	189581218	189581381	TP63
chr3	189581412	189581727	TP63
chr3	189581786	189582305	TP63
chr3	189582310	189582519	TP63
chr3	189582550	189582730	TP63
chr3	189583783	189583878	TP63
chr3	189583905	189584000	TP63
chr3	189584118	189584963	TP63
chr3	189585062	189585157	TP63
chr3	189585188	189585945	TP63
chr3	189585997	189586823	TP63
chr3	189586828	189587570	TP63
chr3	189587578	189587674	TP63
chr3	189590035	189590831	TP63
chr3	189590838	189591452	TP63
chr3	189591504	189591812	TP63
chr3	189597440	189599658	TP63
chr3	189599809	189599904	TP63
chr3	189603451	189603550	TP63
chr3	189603655	189604605	TP63
chr3	189604650	189604745	TP63
chr3	189604752	189604851	TP63
chr3	189606570	189606665	TP63
chr3	189606679	189606848	TP63
chr3	189606851	189607416	TP63
chr3	189607466	189607847	TP63
chr3	189607886	189607981	TP63
chr3	189608358	189608978	TP63
chr3	189608983	189609078	TP63
chr3	189611638	189614204	TP63
chr3	189614232	189614357	TP63
chr3	189614365	189614815	TP63
chr3	189614836	189615539	TP63
chr3	189615549	189615644	TP63
chr3	189615765	189615860	TP63
chr4	1871688	1871784	NSD2
chr4	1871855	1872542	NSD2
chr4	1872548	1872880	NSD2
chr4	1872886	1873187	NSD2
chr4	1873193	1873406	NSD2
chr4	1889067	1889552	NSD2
chr4	1889722	1889817	NSD2
chr4	1893794	1894211	NSD2
chr4	1894226	1894321	NSD2
chr4	1894448	1894739	NSD2
chr4	1895225	1895390	NSD2
chr4	1895398	1895493	NSD2
chr4	1895503	1895601	NSD2
chr4	1895614	1895816	NSD2
chr4	1900447	1900623	NSD2
chr4	1900672	1901556	NSD2
chr4	1901628	1901723	NSD2
chr4	1901897	1903335	NSD2
chr4	1905544	1905639	NSD2
chr4	1905729	1906448	NSD2
chr4	1913457	1913553	NSD2
chr4	1913668	1914069	NSD2
chr4	1914077	1914358	NSD2
chr4	1914387	1914487	NSD2
chr4	1918215	1919068	NSD2
chr4	1919076	1919235	NSD2
chr4	1919484	1919583	NSD2
chr4	1919660	1920660	NSD2
chr4	1920715	1921153	NSD2
chr4	1931890	1932781	NSD2
chr4	1932808	1932906	NSD2
chr4	1936554	1936650	NSD2
chr4	1936674	1936772	NSD2
chr4	1936773	1937198	NSD2
chr4	1939584	1939679	NSD2
chr4	1939956	1940388	NSD2
chr4	1940394	1940637	NSD2
chr4	1940695	1940790	NSD2
chr4	1940871	1941144	NSD2
chr4	1941169	1948412	NSD2
chr4	1948454	1949268	NSD2
chr4	1949286	1949577	NSD2
chr4	1949587	1949683	NSD2
chr4	1949713	1950599	NSD2
chr4	1950608	1950827	NSD2
chr4	1950864	1950959	NSD2
chr4	1952338	1952433	NSD2
chr4	1952483	1954077	NSD2
chr4	1954087	1955607	NSD2
chr4	1956083	1956178	NSD2
chr4	1956225	1956274	NSD2
chr4	1956282	1956431	NSD2
chr4	1956434	1958052	NSD2
chr4	1958245	1958597	NSD2
chr4	1958615	1958710	NSD2
chr4	1959410	1959982	NSD2
chr4	1960009	1960104	NSD2
chr4	1960758	1961676	NSD2
chr4	1962340	1963306	NSD2
chr4	1963317	1963432	NSD2
chr4	1976170	1977288	NSD2
chr4	1977310	1977817	NSD2
chr4	1977844	1978679	NSD2
chr4	1978776	1978871	NSD2
chr4	1979873	1981343	NSD2
chr4	1981351	1983876	NSD2
chr4	1983879	1984367	NSD2
chr4	9814727	9814825	CBL1
chr4	9815119	9815646	CBL1
chr4	9815739	9817517	CBL1
chr4	9817530	9817625	CBL1
chr4	9817633	9817840	CBL1
chr4	9817867	9818440	CBL1
chr4	9818466	9819783	CBL1
chr4	9819868	9819963	CBL1
chr4	106065726	106065943	TET2
chr4	106066029	106066282	TET2
chr4	106066287	106066671	TET2
chr4	106066689	106067744	TET2
chr4	106067748	106068117	TET2
chr4	106068124	106069413	TET2
chr4	106111334	106112303	TET2
chr4	106112310	106112409	TET2
chr4	106122983	106123133	TET2
chr4	106123251	106123712	TET2
chr4	106123717	106123918	TET2
chr4	106154356	106154451	TET2
chr4	106154532	106154797	TET2
chr4	106154812	106155329	TET2
chr4	106155371	106157657	TET2
chr4	106157699	106158178	TET2
chr4	106158179	106158918	TET2
chr4	106158920	106159142	TET2
chr4	106159149	106160378	TET2
chr4	106160384	106161039	TET2
chr4	106161058	106161300	TET2
chr4	106161303	106162098	TET2
chr4	106162113	106165285	TET2
chr4	106165295	106165390	TET2
chr4	106180493	106180617	TET2
chr4	106180623	106181149	TET2
chr4	106181181	106181311	TET2
chr4	106182623	106183311	TET2
chr4	106190154	106190249	TET2
chr4	106190378	106191155	TET2
chr4	106193259	106194092	TET2
chr4	106194124	106194631	TET2
chr4	106195726	106195821	TET2
chr4	106195879	106198924	TET2
chr4	106198930	106199431	TET2
chr4	106199432	106199702	TET2
chr4	106199709	106201317	TET2
chr4	106201398	106201493	TET2
chr4	153241833	153241929	FBXW7
chr4	153241933	153247698	FBXW7
chr4	153247763	153247858	FBXW7
chr4	153248983	153249078	FBXW7
chr4	153249214	153250073	FBXW7
chr4	153250075	153251053	FBXW7
chr4	153251068	153251179	FBXW7
chr4	153251571	153252300	FBXW7
chr4	153252317	153252414	FBXW7
chr4	153253341	153253436	FBXW7
chr4	153253479	153254112	FBXW7
chr4	153258690	153259117	FBXW7
chr4	153267568	153268595	FBXW7
chr4	153269343	153269649	FBXW7
chr4	153269690	153270167	FBXW7
chr4	153270205	153270302	FBXW7
chr4	153270879	153271251	FBXW7
chr4	153271256	153271355	FBXW7
chr4	153271360	153271652	FBXW7
chr4	153273262	153273357	FBXW7
chr4	153273407	153274236	FBXW7
chr4	153274323	153274583	FBXW7
chr4	153302959	153303056	FBXW7
chr4	153303106	153303926	FBXW7
chr4	153332040	153332532	FBXW7
chr4	153332536	153333214	FBXW7
chr4	153333431	153334038	FBXW7
chr4	153451136	153451231	FBXW7
chr4	153451272	153452379	FBXW7
chr4	153455819	153455914	FBXW7
chr4	153455944	153458563	FBXW7
chr4	153458596	153458691	FBXW7
chr5	23505599	23505695	PRDM9
chr5	23505769	23507528	PRDM9
chr5	23507559	23508043	PRDM9
chr5	23508139	23508234	PRDM9
chr5	23508955	23510212	PRDM9
chr5	23510226	23510564	PRDM9
chr5	23517619	23517714	PRDM9
chr5	23517779	23517874	PRDM9
chr5	23517877	23518410	PRDM9
chr5	23520602	23520738	PRDM9
chr5	23520870	23521461	PRDM9
chr5	23521931	23522026	PRDM9
chr5	23522032	23522128	PRDM9
chr5	23522223	23522769	PRDM9
chr5	23522771	23523122	PRDM9
chr5	23523132	23523838	PRDM9
chr5	23523998	23525019	PRDM9
chr5	23525638	23525733	PRDM9
chr5	23525852	23526961	PRDM9
chr5	23526971	23527066	PRDM9
chr5	23527118	23527213	PRDM9
chr5	23527223	23527297	PRDM9
chr5	23527576	23527653	PRDM9
chr5	23527701	23527859	PRDM9
chr5	23527958	23528738	PRDM9
chr5	23528748	23528843	PRDM9
chr5	23528853	23529151	PRDM9
chr5	35851601	35853448	IL7R
chr5	35853573	35853668	IL7R
chr5	35855605	35855700	IL7R
chr5	35855743	35856540	IL7R
chr5	35856741	35857490	IL7R
chr5	35857531	35857626	IL7R
chr5	35860316	35860411	IL7R
chr5	35860453	35860548	IL7R
chr5	35860599	35861464	IL7R
chr5	35861498	35861593	IL7R
chr5	35866860	35866956	IL7R
chr5	35867041	35867136	IL7R
chr5	35867185	35867970	IL7R
chr5	35868064	35868159	IL7R
chr5	35870607	35871084	IL7R
chr5	35871099	35871586	IL7R
chr5	35871679	35871774	IL7R
chr5	35872464	35872560	IL7R
chr5	35872808	35873007	IL7R
chr5	35873266	35874111	IL7R
chr5	35874203	35875007	IL7R
chr5	35875163	35875261	IL7R
chr5	35875288	35876880	IL7R
chr5	35876889	35878495	IL7R
chr5	35878503	35878724	IL7R
chr5	35878733	35878867	IL7R
chr5	35878873	35880109	IL7R
chr5	98190577	98191288	CHD1
chr5	98191294	98191526	CHD1
chr5	98191569	98192190	CHD1
chr5	98192200	98192468	CHD1
chr5	98192559	98192856	CHD1
chr5	98193518	98193851	CHD1
chr5	98193915	98194980	CHD1
chr5	98195201	98196315	CHD1
chr5	98196325	98196573	CHD1
chr5	98198739	98199108	CHD1
chr5	98199130	98199602	CHD1
chr5	98199624	98199791	CHD1
chr5	98203542	98203638	CHD1
chr5	98203762	98204061	CHD1
chr5	98204124	98205889	CHD1
chr5	98206222	98206616	CHD1
chr5	98207488	98207939	CHD1
chr5	98207970	98208575	CHD1
chr5	98208738	98208833	CHD1
chr5	98209134	98209780	CHD1
chr5	98210307	98210402	CHD1
chr5	98210403	98210599	CHD1
chr5	98210625	98211116	CHD1
chr5	98211445	98211543	CHD1
chr5	98211777	98212007	CHD1
chr5	98212010	98212652	CHD1
chr5	98212714	98212809	CHD1
chr5	98215244	98215867	CHD1
chr5	98216194	98216289	CHD1
chr5	98216338	98216434	CHD1
chr5	98216455	98217144	CHD1
chr5	98217158	98217279	CHD1
chr5	98217316	98218106	CHD1
chr5	98218321	98218420	CHD1
chr5	98218517	98219196	CHD1
chr5	98220962	98221111	CHD1
chr5	98221113	98221295	CHD1
chr5	98221303	98222096	CHD1
chr5	98222103	98222264	CHD1
chr5	98222269	98222367	CHD1
chr5	98223126	98223221	CHD1
chr5	98223250	98223347	CHD1
chr5	98223424	98224179	CHD1
chr5	98224275	98225388	CHD1
chr5	98225525	98225645	CHD1
chr5	98227739	98227834	CHD1
chr5	98227835	98228622	CHD1
chr5	98228727	98229643	CHD1
chr5	98229645	98229784	CHD1
chr5	98230195	98230398	CHD1
chr5	98231948	98232108	CHD1
chr5	98232460	98232619	CHD1
chr5	98232656	98233156	CHD1
chr5	98233242	98233337	CHD1
chr5	98233346	98234627	CHD1
chr5	98234794	98234889	CHD1
chr5	98234960	98235509	CHD1
chr5	98235599	98235694	CHD1
chr5	98236255	98237141	CHD1
chr5	98237148	98237246	CHD1
chr5	98237374	98237469	CHD1
chr5	98237881	98237976	CHD1
chr5	98238050	98238754	CHD1
chr5	98238823	98239186	CHD1
chr5	98239288	98239932	CHD1
chr5	98240050	98240347	CHD1
chr5	98240350	98241238	CHD1
chr5	98241281	98241376	CHD1
chr5	98241484	98241579	CHD1
chr5	98261737	98263370	CHD1
chr5	98263395	98264557	CHD1
chr5	98264565	98264625	CHD1
chr5	98264758	98265196	CHD1
chr5	98265219	98265700	CHD1
chr5	110404194	110404929	TSLP
chr5	110404938	110406039	TSLP
chr5	110406048	110406120	TSLP
chr5	110406129	110407971	TSLP
chr5	110407973	110408068	TSLP
chr5	110408119	110408815	TSLP
chr5	110408868	110408995	TSLP
chr5	110409005	110409138	TSLP
chr5	110409139	110409702	TSLP
chr5	110409790	110409885	TSLP
chr5	110411097	110411193	TSLP
chr5	110411326	110411881	TSLP
chr5	110411887	110412940	TSLP
chr5	110412941	110413850	TSLP
chr5	110413851	110413983	TSLP
chr5	142657381	142657656	NR3C1
chr5	142657669	142662296	NR3C1
chr5	142672879	142673011	NR3C1
chr5	142673099	142673320	NR3C1
chr5	142673397	142674191	NR3C1
chr5	142674198	142674955	NR3C1
chr5	142674964	142675707	NR3C1
chr5	142677559	142677655	NR3C1
chr5	142677743	142678592	NR3C1
chr5	142679652	142679799	NR3C1
chr5	142679967	142680767	NR3C1
chr5	142689383	142689841	NR3C1
chr5	142689888	142690064	NR3C1
chr5	142690133	142690298	NR3C1
chr5	142693228	142693396	NR3C1
chr5	142693465	142694049	NR3C1
chr5	142768909	142769262	NR3C1
chr5	142769269	142769946	NR3C1
chr5	142778659	142778755	NR3C1
chr5	142778779	142778985	NR3C1
chr5	142778994	142779094	NR3C1
chr5	142779101	142781116	NR3C1
chr5	142781146	142781382	NR3C1
chr5	142781400	142781495	NR3C1
chr5	142781536	142781657	NR3C1
chr5	142781735	142781833	NR3C1
chr5	142781924	142782548	NR3C1
chr5	142782590	142783295	NR3C1
chr5	142783312	142784258	NR3C1
chr5	142784368	142784625	NR3C1
chr5	142784671	142785155	NR3C1
chr5	142787990	142788085	NR3C1
chr5	142788153	142789111	NR3C1
chr5	142812934	142813029	NR3C1
chr5	142813116	142813523	NR3C1
chr5	142813941	142814721	NR3C1
chr5	142814725	142816277	NR3C1
chr5	142816282	142817909	NR3C1
chr5	142817918	142818034	NR3C1
chr5	142818106	142818945	NR3C1
chr5	142819060	142819145	NR3C1
chr5	142819271	142819315	NR3C1
chr5	142819584	142819807	NR3C1
chr5	142819808	142820321	NR3C1
chr5	142820323	142820830	NR3C1
chr5	142820862	142821315	NR3C1
chr5	142821325	142824134	NR3C1
chr5	142824931	142825070	NR3C1
chr5	142825078	142826138	NR3C1
chr5	142826141	142827193	NR3C1
chr5	142827195	142828476	NR3C1
chr5	142828485	142828580	NR3C1
chr5	142828590	142829193	NR3C1
chr5	142829219	142830819	NR3C1
chr5	142830820	142832454	NR3C1
chr5	142832460	142832734	NR3C1
chr5	142832964	142833059	NR3C1
chr5	142833099	142833535	NR3C1
chr5	142833538	142834369	NR3C1
chr5	142834377	142834583	NR3C1
chr5	142834590	142835560	NR3C1
chr5	142835611	142835889	NR3C1
chr5	142836025	142836120	NR3C1
chr5	142836153	142837623	NR3C1
chr5	142837624	142837757	NR3C1
chr5	142837767	142838387	NR3C1
chr5	142838449	142838602	NR3C1
chr5	142838705	142839024	NR3C1
chr5	142839036	142841297	NR3C1
chr5	142841491	142841633	NR3C1
chr5	142841644	142841739	NR3C1
chr5	142841764	142842434	NR3C1
chr5	142842435	142842484	NR3C1
chr5	142842529	142842859	NR3C1
chr5	142842869	142843319	NR3C1
chr5	142843346	142844080	NR3C1
chr5	142844085	142844262	NR3C1
chr5	142844273	142845539	NR3C1
chr5	142845574	142845819	NR3C1
chr5	142846069	142846119	NR3C1
chr5	142846144	142846242	NR3C1
chr5	142846249	142847381	NR3C1
chr5	142847436	142849780	NR3C1
chr5	142849790	142849934	NR3C1
chr5	142849943	142852691	NR3C1
chr5	142852699	142854744	NR3C1
chr5	142854754	142855038	NR3C1
chr5	142855048	142855094	NR3C1
chr5	142855096	142855539	NR3C1
chr5	142855591	142855958	NR3C1
chr5	142855966	142857122	NR3C1
chr5	142857124	142857852	NR3C1
chr5	142857854	142858645	NR3C1
chr5	142858764	142858807	NR3C1
chr5	142858902	142860067	NR3C1
chr5	142860085	142860464	NR3C1
chr5	142860479	142861790	NR3C1
chr5	142861792	142863742	NR3C1
chr5	142863773	142865668	NR3C1
chr5	142865704	142867196	NR3C1
chr5	142867219	142867314	NR3C1
chr5	142867316	142867412	NR3C1
chr5	142867418	142869455	NR3C1
chr5	142869456	142876680	NR3C1
chr5	142876720	142877429	NR3C1
chr5	142877434	142877614	NR3C1
chr5	142877623	142877698	NR3C1
chr5	142877705	142877815	NR3C1
chr5	142877823	142879705	NR3C1
chr5	142879869	142879940	NR3C1
chr5	142880068	142880164	NR3C1
chr5	142880201	142882527	NR3C1
chr5	142882534	142882656	NR3C1
chr5	142882696	142883358	NR3C1
chr5	142883365	142884660	NR3C1
chr5	142884664	142886272	NR3C1
chr5	142886282	142887526	NR3C1
chr5	142887531	142887635	NR3C1
chr5	142887680	142887814	NR3C1
chr5	142887824	142888980	NR3C1
chr5	142888984	142890092	NR3C1
chr5	142890101	142890707	NR3C1
chr5	142890740	142891950	NR3C1
chr5	142891995	142892986	NR3C1
chr5	142892989	142893038	NR3C1
chr5	142893048	142893178	NR3C1
chr5	142893181	142893315	NR3C1
chr5	142893320	142896179	NR3C1
chr5	142896189	142897176	NR3C1
chr5	142897191	142897334	NR3C1
chr5	142897344	142897526	NR3C1
chr5	142897555	142897709	NR3C1
chr5	142897722	142897908	NR3C1
chr5	142897910	142898153	NR3C1
chr5	142898400	142898495	NR3C1
chr5	142898616	142898833	NR3C1
chr5	142899001	142899096	NR3C1
chr5	142899106	142899275	NR3C1
chr5	142899281	142902620	NR3C1
chr5	142902630	142902876	NR3C1
chr5	142902878	142906171	NR3C1
chr5	142906206	142906820	NR3C1
chr5	142906828	142907036	NR3C1
chr5	142907076	142908117	NR3C1
chr5	142908166	142909923	NR3C1
chr5	142909935	142910171	NR3C1
chr5	142910216	142910545	NR3C1
chr5	142910669	142911309	NR3C1
chr5	142911315	142911411	NR3C1
chr5	142911481	142913079	NR3C1
chr5	142913080	142913156	NR3C1
chr5	142913160	142913585	NR3C1
chr5	142913635	142913681	NR3C1
chr5	142913695	142914795	NR3C1
chr5	142914802	142916514	NR3C1
chr5	142916520	142917755	NR3C1
chr5	142918037	142918259	NR3C1
chr5	142918268	142918462	NR3C1
chr5	142918483	142924077	NR3C1
chr5	142924083	142924491	NR3C1
chr5	142924496	142925165	NR3C1
chr5	142925186	142925667	NR3C1
chr5	142925709	142926446	NR3C1
chr5	142926480	142926779	NR3C1
chr5	142926788	142926875	NR3C1
chr5	142926876	142927386	NR3C1
chr5	142927399	142927520	NR3C1
chr5	142927541	142927925	NR3C1
chr5	142928002	142928205	NR3C1
chr5	142928215	142928578	NR3C1
chr5	142928608	142928976	NR3C1
chr5	142929030	142929209	NR3C1
chr5	142929346	142929741	NR3C1
chr5	142929753	142929816	NR3C1
chr5	142929942	142930037	NR3C1
chr5	142930038	142935192	NR3C1
chr5	142935219	142935467	NR3C1
chr5	142935587	142935740	NR3C1
chr5	142935801	142935916	NR3C1
chr5	142936048	142936367	NR3C1
chr5	142936368	142939031	NR3C1
chr5	142939036	142939173	NR3C1
chr5	142939183	142943306	NR3C1
chr5	142943316	142943502	NR3C1
chr5	142943508	142943575	NR3C1
chr5	142943581	142943625	NR3C1
chr5	142943631	142943785	NR3C1
chr5	142943795	142943892	NR3C1
chr5	142943926	142944822	NR3C1
chr5	142944864	142944959	NR3C1
chr5	142945005	142946337	NR3C1
chr5	142946345	142946638	NR3C1
chr5	142946650	142946805	NR3C1
chr5	142946808	142947851	NR3C1
chr5	142947933	142948255	NR3C1
chr5	142948347	142949757	NR3C1
chr5	142949761	142950213	NR3C1
chr5	142950220	142950329	NR3C1
chr5	142950358	142950927	NR3C1
chr5	142950928	142951669	NR3C1
chr5	142951716	142955282	NR3C1
chr5	142955293	142955967	NR3C1
chr5	142956007	142956455	NR3C1
chr5	142956461	142957966	NR3C1
chr5	142958039	142961515	NR3C1
chr5	142961542	142964065	NR3C1
chr5	142964102	142964229	NR3C1
chr5	142964592	142968417	NR3C1
chr5	142968542	142969648	NR3C1
chr5	142969663	142969758	NR3C1
chr5	142969793	142969953	NR3C1
chr5	142969969	142970700	NR3C1
chr5	142970705	142971014	NR3C1
chr5	142971159	142972159	NR3C1
chr5	142972185	142976391	NR3C1
chr5	142976396	142978453	NR3C1
chr5	142978458	142979035	NR3C1
chr5	142979037	142979885	NR3C1
chr5	142979921	142982273	NR3C1
chr5	142982277	142982893	NR3C1
chr5	142982918	142983601	NR3C1
chr5	142983611	142984117	NR3C1
chr5	142984204	142987547	NR3C1
chr5	142987553	142988384	NR3C1
chr5	142988394	142988489	NR3C1
chr5	142988503	142988624	NR3C1
chr5	142988632	142988759	NR3C1
chr5	142988769	142988864	NR3C1
chr5	142988996	142989163	NR3C1
chr5	142989177	142989241	NR3C1
chr5	142989263	142989340	NR3C1
chr5	142989440	142989480	NR3C1
chr5	142989712	142989807	NR3C1
chr5	142989926	142990021	NR3C1
chr5	142990108	142990469	NR3C1
chr5	142990487	142990536	NR3C1
chr5	142990542	142990852	NR3C1
chr5	142990856	142991741	NR3C1
chr5	142991871	142992086	NR3C1
chr5	142992107	142992177	NR3C1
chr5	142992186	142992304	NR3C1
chr5	142992315	142993147	NR3C1
chr5	142993157	142994680	NR3C1
chr5	142994690	142995225	NR3C1
chr5	142995319	142995428	NR3C1
chr5	142995434	142996339	NR3C1
chr5	142996344	142996461	NR3C1
chr5	142996471	142996590	NR3C1
chr5	142996616	142996760	NR3C1
chr5	142996942	142996983	NR3C1
chr5	142997005	142997100	NR3C1
chr5	142997183	142997278	NR3C1
chr5	142997317	142997434	NR3C1
chr5	142997522	142999224	NR3C1
chr5	142999303	143000833	NR3C1
chr5	143000851	143000978	NR3C1
chr5	143000988	143001083	NR3C1
chr5	143001136	143001231	NR3C1
chr5	143001439	143001534	NR3C1
chr5	143001619	143001743	NR3C1
chr5	143001828	143002091	NR3C1
chr5	143002098	143003069	NR3C1
chr5	143003109	143003663	NR3C1
chr5	143003678	143005261	NR3C1
chr5	143005266	143006612	NR3C1
chr5	143006613	143006983	NR3C1
chr5	143006992	143007101	NR3C1
chr5	143007122	143007495	NR3C1
chr5	143007902	143012279	NR3C1
chr5	143012283	143012433	NR3C1
chr5	143012479	143012744	NR3C1
chr5	143012754	143014835	NR3C1
chr5	143014870	143018248	NR3C1
chr5	143018402	143020079	NR3C1
chr5	143020405	143022692	NR3C1
chr5	143022695	143023708	NR3C1
chr5	143023749	143029353	NR3C1
chr5	143029363	143031151	NR3C1
chr5	143031156	143033757	NR3C1
chr5	143033763	143033842	NR3C1
chr5	143033848	143033963	NR3C1
chr5	143033969	143034143	NR3C1
chr5	143034175	143035517	NR3C1
chr5	143035527	143038472	NR3C1
chr5	143038477	143038646	NR3C1
chr5	143038651	143038825	NR3C1
chr5	143038842	143041680	NR3C1
chr5	143041698	143043126	NR3C1
chr5	143043519	143045939	NR3C1
chr5	143045940	143048291	NR3C1
chr5	143048300	143050143	NR3C1
chr5	143050151	143053619	NR3C1
chr5	143053628	143055685	NR3C1
chr5	143055704	143059335	NR3C1
chr5	143059340	143061059	NR3C1
chr5	143061063	143061243	NR3C1
chr5	143061324	143063767	NR3C1
chr5	143063808	143064335	NR3C1
chr5	143064336	143064412	NR3C1
chr5	143064671	143066225	NR3C1
chr5	143066757	143066852	NR3C1
chr5	143066953	143067058	NR3C1
chr5	143067067	143068250	NR3C1
chr5	143068260	143068560	NR3C1
chr5	143068573	143069328	NR3C1
chr5	143069333	143071334	NR3C1
chr5	143071337	143072174	NR3C1
chr5	143072180	143072294	NR3C1
chr5	143072297	143072632	NR3C1
chr5	143072790	143073416	NR3C1
chr5	143073449	143075834	NR3C1
chr5	143075853	143075948	NR3C1
chr5	143076097	143076193	NR3C1
chr5	143076194	143076545	NR3C1
chr5	143076553	143078508	NR3C1
chr5	143078514	143078598	NR3C1
chr5	143078601	143082167	NR3C1
chr5	143082168	143082817	NR3C1
chr5	143082824	143083290	NR3C1
chr5	143083389	143083436	NR3C1
chr5	143083446	143083541	NR3C1
chr5	143083561	143084037	NR3C1
chr5	143084045	143084210	NR3C1
chr5	143084227	143084514	NR3C1
chr5	143084517	143086452	NR3C1
chr5	143086460	143087777	NR3C1
chr5	143087844	143089755	NR3C1
chr5	143089761	143090562	NR3C1
chr5	143090566	143090720	NR3C1
chr5	143090729	143090868	NR3C1
chr5	143090878	143091740	NR3C1
chr5	143091742	143096685	NR3C1
chr5	143096698	143098547	NR3C1
chr5	143098559	143099163	NR3C1
chr5	143099321	143101444	NR3C1
chr5	143101454	143102549	NR3C1
chr5	143102605	143102851	NR3C1
chr5	143102891	143103258	NR3C1
chr5	143103263	143103695	NR3C1
chr5	143103705	143104593	NR3C1
chr5	143104594	143105340	NR3C1
chr5	143105341	143105436	NR3C1
chr5	143105537	143105582	NR3C1
chr5	143105595	143105677	NR3C1
chr5	143105698	143105793	NR3C1
chr5	143105823	143106346	NR3C1
chr5	143106407	143106464	NR3C1
chr5	143106627	143106722	NR3C1
chr5	143106832	143108310	NR3C1
chr5	143108311	143108419	NR3C1
chr5	143108432	143114352	NR3C1
chr5	143114484	143114637	NR3C1
chr5	143114719	143114814	NR3C1
chr5	148204264	148204483	ADRB2
chr5	148204714	148204810	ADRB2
chr5	148204852	148204947	ADRB2
chr5	148204952	148206902	ADRB2
chr5	148206907	148207601	ADRB2
chr5	148207611	148208586	ADRB2
chr5	149432388	149432483	CSF1R
chr5	149432653	149434608	CSF1R
chr5	149434626	149435093	CSF1R
chr5	149435223	149435433	CSF1R
chr5	149435441	149436130	CSF1R
chr5	149436476	149436571	CSF1R
chr5	149436638	149438321	CSF1R
chr5	149438902	149439330	CSF1R
chr5	149439334	149439636	CSF1R
chr5	149439870	149439965	CSF1R
chr5	149440043	149440138	CSF1R
chr5	149440161	149441683	CSF1R
chr5	149446195	149446970	CSF1R
chr5	149447034	149447274	CSF1R
chr5	149447361	149447456	CSF1R
chr5	149447483	149448226	CSF1R
chr5	149449019	149450558	CSF1R
chr5	149452139	149452237	CSF1R
chr5	149452436	149453422	CSF1R
chr5	149453473	149453568	CSF1R
chr5	149456131	149457223	CSF1R
chr5	149457386	149457884	CSF1R
chr5	149459071	149460068	CSF1R
chr5	149460072	149460904	CSF1R
chr5	149465427	149465522	CSF1R
chr5	149465548	149465986	CSF1R
chr5	149465992	149466587	CSF1R
chr5	149492373	149494821	CSF1R
chr5	149494824	149495655	CSF1R
chr5	149496845	149497072	PDGFRB
chr5	149497085	149497639	PDGFRB
chr5	149498084	149498781	PDGFRB
chr5	149498813	149499934	PDGFRB
chr5	149500010	149500105	PDGFRB
chr5	149500193	149502081	PDGFRB
chr5	149502227	149503052	PDGFRB
chr5	149503217	149503312	PDGFRB
chr5	149503503	149503600	PDGFRB
chr5	149503634	149504419	PDGFRB
chr5	149504429	149505437	PDGFRB
chr5	149505492	149505587	PDGFRB
chr5	149505778	149506466	PDGFRB
chr5	149508831	149509097	PDGFRB
chr5	149509105	149509976	PDGFRB
chr5	149509981	149510491	PDGFRB
chr5	149510549	149510720	PDGFRB
chr5	149511119	149511214	PDGFRB
chr5	149511264	149511783	PDGFRB
chr5	149511986	149515387	PDGFRB
chr5	149515391	149515797	PDGFRB
chr5	149516057	149517377	PDGFRB
chr5	149517382	149517477	PDGFRB
chr5	149517525	149517620	PDGFRB
chr5	149532565	149532660	PDGFRB
chr5	149532683	149533298	PDGFRB
chr5	149533299	149533870	PDGFRB
chr5	149533962	149534060	PDGFRB
chr5	149534394	149534490	PDGFRB
chr5	149534549	149535303	PDGFRB
chr5	149535306	149536487	PDGFRB
chr5	158122303	158122398	EBF1
chr5	158122482	158124128	EBF1
chr5	158124129	158126351	EBF1
chr5	158134216	158134896	EBF1
chr5	158134903	158135641	EBF1
chr5	158135741	158135840	EBF1
chr5	158138633	158138728	EBF1
chr5	158138740	158139624	EBF1
chr5	158139706	158140556	EBF1
chr5	158141002	158141665	EBF1
chr5	158157449	158157890	EBF1
chr5	158157903	158158595	EBF1
chr5	158158616	158158712	EBF1
chr5	158203701	158204874	EBF1
chr5	158204891	158204990	EBF1
chr5	158222969	158223064	EBF1
chr5	158223065	158223623	EBF1
chr5	158223662	158223766	EBF1
chr5	158223810	158223915	EBF1
chr5	158249826	158249921	EBF1
chr5	158249983	158250620	EBF1
chr5	158266575	158266670	EBF1
chr5	158266703	158267085	EBF1
chr5	158267094	158267564	EBF1
chr5	158445643	158446310	EBF1
chr5	158500120	158500215	EBF1
chr5	158500219	158501101	EBF1
chr5	158511200	158511388	EBF1
chr5	158511490	158511875	EBF1
chr5	158511968	158512066	EBF1
chr5	158522188	158522284	EBF1
chr5	158522380	158525093	EBF1
chr5	158526334	158526854	EBF1
chr5	158526864	158526974	EBF1
chr5	158526982	158527084	EBF1
chr5	158527151	158527928	EBF1
chr6	160387471	160387566	IGF2R
chr6	160387571	160387666	IGF2R
chr6	160387730	160388547	IGF2R
chr6	160388593	160388693	IGF2R
chr6	160388869	160389868	IGF2R
chr6	160389923	160390836	IGF2R
chr6	160390850	160390945	IGF2R
chr6	160391084	160391180	IGF2R
chr6	160412003	160412098	IGF2R
chr6	160412129	160412756	IGF2R
chr6	160412766	160412861	IGF2R
chr6	160429518	160429613	IGF2R
chr6	160429817	160430420	IGF2R
chr6	160430882	160430977	IGF2R
chr6	160431075	160432345	IGF2R
chr6	160445168	160446065	IGF2R
chr6	160447733	160447830	IGF2R
chr6	160447914	160448468	IGF2R
chr6	160448515	160448610	IGF2R
chr6	160450335	160450588	IGF2R
chr6	160450594	160450989	IGF2R
chr6	160451100	160451254	IGF2R
chr6	160453177	160454270	IGF2R
chr6	160454276	160454466	IGF2R
chr6	160455036	160455244	IGF2R
chr6	160455327	160455883	IGF2R
chr6	160461192	160461898	IGF2R
chr6	160461905	160462128	IGF2R
chr6	160463709	160463881	IGF2R
chr6	160463892	160464886	IGF2R
chr6	160465082	160465413	IGF2R
chr6	160465422	160465866	IGF2R
chr6	160465867	160465962	IGF2R
chr6	160466295	160466390	IGF2R
chr6	160466447	160469182	IGF2R
chr6	160469187	160469717	IGF2R
chr6	160469748	160469847	IGF2R
chr6	160471216	160472053	IGF2R
chr6	160476772	160476868	IGF2R
chr6	160476959	160477977	IGF2R
chr6	160478749	160479347	IGF2R
chr6	160479385	160479480	IGF2R
chr6	160479574	160479669	IGF2R
chr6	160479679	160480466	IGF2R
chr6	160480579	160480674	IGF2R
chr6	160481123	160481218	IGF2R
chr6	160481359	160482308	IGF2R
chr6	160482322	160483216	IGF2R
chr6	160483373	160483931	IGF2R
chr6	160483960	160484059	IGF2R
chr6	160484216	160484311	IGF2R
chr6	160484338	160485576	IGF2R
chr6	160485676	160486124	IGF2R
chr6	160488863	160489394	IGF2R
chr6	160490385	160490541	IGF2R
chr6	160490545	160491430	IGF2R
chr6	160491447	160491542	IGF2R
chr6	160492689	160493355	IGF2R
chr6	160493392	160495540	IGF2R
chr6	160496392	160496580	IGF2R
chr6	160496627	160497618	IGF2R
chr6	160498833	160498928	IGF2R
chr6	160498979	160499832	IGF2R
chr6	160499888	160499986	IGF2R
chr6	160500066	160500161	IGF2R
chr6	160500220	160501089	IGF2R
chr6	160501099	160501616	IGF2R
chr6	160501675	160501770	IGF2R
chr6	160504659	160504754	IGF2R
chr6	160504830	160505237	IGF2R
chr6	160505261	160506356	IGF2R
chr6	160506364	160506568	IGF2R
chr6	160506695	160506790	IGF2R
chr6	160508866	160508962	IGF2R
chr6	160508982	160509374	IGF2R
chr6	160509820	160510500	IGF2R
chr6	160510562	160510657	IGF2R
chr6	160510667	160511514	IGF2R
chr6	160511518	160511613	IGF2R
chr6	160511751	160511846	IGF2R
chr6	160517236	160517991	IGF2R
chr6	160518003	160518098	IGF2R
chr6	160523233	160523328	IGF2R
chr6	160523377	160524012	IGF2R
chr6	160524552	160525234	IGF2R
chr6	160525378	160526757	IGF2R
chr6	160526765	160526940	IGF2R
chr6	160527003	160527833	IGF2R
chr6	160533159	160534864	IGF2R
chr7	50342395	50342494	IKZF1
chr7	50342537	50342677	IKZF1
chr7	50342684	50343943	IKZF1
chr7	50343950	50344291	IKZF1
chr7	50344293	50344652	IKZF1
chr7	50344654	50344810	IKZF1
chr7	50345062	50345158	IKZF1
chr7	50347838	50348848	IKZF1
chr7	50358049	50358144	IKZF1
chr7	50358226	50358378	IKZF1
chr7	50358413	50359002	IKZF1
chr7	50366538	50367810	IKZF1
chr7	50367835	50367930	IKZF1
chr7	50367994	50368089	IKZF1
chr7	50434910	50437834	IKZF1
chr7	50437887	50437983	IKZF1
chr7	50443817	50445427	IKZF1
chr7	50450084	50450840	IKZF1
chr7	50450934	50451029	IKZF1
chr7	50454668	50455304	IKZF1
chr7	50455457	50455552	IKZF1
chr7	50458914	50459966	IKZF1
chr7	50460206	50460305	IKZF1
chr7	50467478	50468092	IKZF1
chr7	50468101	50468421	IKZF1
chr7	50468433	50469347	IKZF1
chr7	50469356	50470344	IKZF1
chr7	50470349	50473247	IKZF1
chr7	55085158	55086692	EGFR
chr7	55086706	55087370	EGFR
chr7	55087442	55087537	EGFR
chr7	55110937	55111185	EGFR
chr7	55111315	55111989	EGFR
[truncated: 2,749 more rows]
