# Supplementary material for: Unique mutation and gene expression in High Hyperdiploid Acute Lymphoblastic Leukaemia with whole chromosome uniparental isodisomy
Source: Research Square preprint supplement (doi:10.21203/rs.3.rs-1349722/v1), 2022-02-16
Supplement: Supplementary file 12 [file f9314e177fe33b5112923b7d.xlsx]

## Sheet: Sheet1
Supplementary Table 5 . Copy number and Mutation profile of samples clustered on the tSNE analysis.
UPN	Ge+C:ABnder	modal number	Status	UPD chromosomes	mutations	Blast %	Ch1		Ch2		Ch3		Ch4		Ch5		Ch6		Ch7		Ch8		Ch9		Ch10		Ch11		Ch12		Ch13	Ch14	Ch15	Ch16		Ch17		Ch18		Ch19		Ch20		Ch21	Ch22	X		Y
52	M	63	AG,+2,+5,+8,+11,+12		RUNX1, TP73,TYK2	79	2 copies	2 copies	3 copies	3 copies	2 copies	2 copies	3 copies	3 copies	3 copies	3 copies	3 copies	3 copies	2 copies	2 copies	3 copies	3 copies	2 copies	2 copies	3 copies	3 copies	3 copies	3 copies	3 copies	3 copies	2 copies	4 copies	2 copies	2 copies	2 copies	3 copies	3 copies	4 copies	4 copies	2 copies	2 copies	2 copies	2 copies	4 copies	3 copies	2 copies	2 copies	2 copies	M
56	F	64	UPD,+2,+5,+8,+11,+12	20 and 22	KMT2D,RUNX1,STAG1,TP73	82	2 copies	3 copies	seg 3 copies	seg 3 copies	2 copies	2 copies	4 copies	4 copies	3 copies	3 copies	3 copies	3 copies	2 copies	2 copies	4 copies (3=1)	4 copies (3+1)	2 copies	2 copies	3 copies	3 copies	3 copies	3 copies	3 copies	3 copies	2 copies	3 copies	2 copies	2 copies	2 copies	3 copies	3 copies	3 copies	3 copies	2 copies	2 copies	UPD	UPD	4 copies	UPD	4 copies	4 copies		F
47	M	54	Standard, subclonal i7q		KRAS	87	2 copies	2 copies	2 copies	2 copies	2 copies	2 copies	4 Copies	4 Copies	2 copies	2 copies	2 copies	2 copies	1 copy (SUBCLONAL 22%)	3 copies (SUBCLONAL 22%)	2 copies	2 copies	2 copies	2 copies	3 copies	3 copies	2 copies	2 copies	2 copies	2 copies	2 copies	3 copies	2 copies	2 copies	2 copies	3 copies	3 copies	3 copies	3copies	2 copies	2 copies	2 copies	2 copies	3 copies	2 copies	2 copies	2 copies		M
46	M	56	Standard		NRAS	85	2 copies	3 copies	2 copies	2 copies	2 copies	2 copies	3 copies	3 copies	2 copies	2 copies	3 copies	3 copies	2 copies	2 copies	2 copies	2 copies	2 copies	2 copies	3copies	3 copies	2 copies	2 copies	2 copies	2 copies	2 copies	3 copies	2 copies	2 copies	2 copies	3 copies	3 copies	3 copies	3 copies	2 copies	2 copies	2 copies	2 copies	4copies	2 copies	2 copies	2 copies	2 copies	M
8	F	57	AG,+7,+8,+9		CSMD2,JAK2,ERBB2,NF1,TBL1XR1,NF1,TYK2	92	2 copies	2 copies	2 copies	2 copies	2 copies	2 copies	2 copies	2 copies	2 copies	2 copies	2 copies	2 copies	3 copies	3 copies	3 copies	3 copies	3 copies	3 copies	3 copies	3 copies	3 copies	3 copies	2 copies	2 copies	2 copies	3 copies	2 copies	2 copies	2 copies	2 copies	2 copies	3 copies	3 copies	2 copies	2 copies	2 copies	2 copies	4copies	2 copies	4 copies	4 copies		F
17	M	55	AG,+8		NRAS	92	2 copies	2 copies	2 copies	2 copies	2 copies	2 copies	2 copies	2 copies	2 copies	2 copies	3 copies	3 copies	2 copies	2 copies	3 copies	3 copies	2 copies	2 copies	3 copies	3 copies	2 copies	2 copies	2 copies	2 copies	2 copies	4 copies	2 copies	2 copies	2 copies	3 copies	3 copies	2 copies	2 copies	2 copies	2 copies	2 copies	2 copies	4 copies	2 copies	2copies	2 copies		M
19	F	55	STD		NRAS	89	2 copies	3 copies	2 copies	2 copies	2 copies	2 copies	3 copies	3 copies	2 copies	2 copies	3 copies	3 copies	2 copies	2 copies	2 copies	2 copies	2 copies	2 copies	3 copies	3 copies	2 copies	2 copies	2 copies	2 copies	2 copies	3 copies	2 copies	2 copies	2 copies	3 copies	3copies	3 copies	3copies	2 copies	2 copies	2 copies	2 copies	4 copies	2 copies	3 copies	3copies		F
11	F	59	UPD,+5,+8,+11	1,7	ASXL1,KRAS	89	UPD	UPT	2 copies	2 copies	2 copies	2 copies	3 copies	3 copies	3 copies	3 copies	3 copies	3 copies	UPD	UPD	3 copies	3 copies	2 copies	2 copies	3 copies	3 copies	3 copies	3 copies	seg 3 copies	seg 3 copies	2 copies	3 copies	2 copies	2 copies	2 copies	3 copies	3 copies	3 copies	3 copies	2 copies	2 copies	2 copies	2 copies	4 copies	2 copies	3 copies	3 copies		F
43	M	57	Standard +9		NRAS	88	2 copies	3 copies	2 copies	2 copies	2 copies	2 copies	3 copies	3 copies	2 copies	2 copies	3 copies	3 copies	2 copies	2 copies	2 copies	2 copies	3 copies	3 copies	3 copies	3 copies	2 copies	2 copies	2 copies	2 copies	2 copies	3 copies	2 copies	2 copies	2 copies	3 copies	3 copies	4 copies	4 copies	2 copies	2 copies	2 copies	2 copies	4 copies	2 copies	2 copies	2 copies		M
51	F	53	Standard ,+9		CHD4,KMT2D,KRAS,CREBBP	88	2 copies	2 copies	2 copies	2 copies	2 copies	2 copies	3 copies	3 copies	2 copies	2 copies	2 copies	2 copies	2 copies	2 copies	2 copies	2 copies	3 copies	3 copies	2 copies	2 copies	2 copies	2 copies	2 copies	2 copies	2 copy	3 copies	2 copies	2 copies	2 copies	2 copies	2 copies	3 copies	3 copies	2 copies	2 copies	2 copies	2 copies	4 copies	2 copies	4 copies	3 copies		F
53	M	54	Standard ,+9,+Y		KRAS	80	2 copies	3 copies/ del toward telomeric segment	2 copies	2 copies	2 copies	2 copies	3 copies	3 copies	2 copies	2 copies	3 copies	3 copies	2 copies	2 copies	2 copies	2 copies	3 copies	3 copies	2 copies	2 copies	2 copies	2 copies	2 copies	2 copies	2 copies	3 copies	2 copies	2 copies	2 copies	2 copies	2 copies	2 copies	2 copies	2 copies	2 copies	2 copies	2 copies	4copies	2 copies	2 copies	2 copies	2 copies	M
33	M	54	Standard ,+8		NA	87.4	2 copies	2 copies	2 copies	2 copies	2 copies	2 copies	3 copies	3 copies	2 copies	2 copies	3 copies	3 copies	2 copies	2 copies	3 copies	3 copies	2 copies	2 copies	3 copies	3 copies	2 copies	2 copies	2 copies	2 copies	2 copies	2 copies	2 copies	2 copies	2 copies	2 copies	2 copies	3 copies	3 copies	2 copies	2 copies	2 copies	2 copies	4 copies	2 copies	2 copies	2 copies		M
34	M	54	Standard ,+8		HMCN1,KRAS	93.6	2 copies	2 copies	2 copies	2 copies	2 copies	2 copies	2 copies	2 copies	2 copies	2 copies	3 copies	3 copies	2 copies	2 copies	3 copies	3 copies	2 copies	2 copies	3 copies	3 copies	2 copies	2 copies	2 copies	2 copies	2 copies	3 copies	2 copies	2 copies	2 copies	3 copies	3 copies	2 copies	2 copies	2 copies	2 copies	2 copies	2 copies	4 copies	2 copies	2 copies	2 copies		M
23	M	55	UPD, Subclonal +9	5,15,17,22	NF1,RUNX1	83	2 copies	2 copies	2 copies	2 copies	2 copies	2 copies	3 copies	3 copies	UPD	UPD	3 copies	3 copies	2 copies	2 copies	2 copies	2 copies	subclonal 3 copies (32%)	subclonal 3 copies (32%)	3 copies	3 copies	2 copies	2 copies	2 copies	2 copies	2 copies	3 copies	UPD	2 copies	2 copies	UPD	UPD	3 copies	3 copies	2 copies	2 copies	2 copies	2 copies	4 copies	UPD	2 Copies	2 Copies		M
54	F	54	UPD	9	KMT2D	90	2 copies	3 copies	2 copies	2 copies	3 copies	3 copies	3 copies	3 copies	2 copies	2 copies	3 copies	3 copies	2 copies	2 copies	2 copies	2 copies	UPD	UPD	3 copies	3 copies	2 copies	2 copies	2 copies	2 copies	2 copies	3 copies	2 copies	2 copies	2 copies	2 copies	2 copies	3 copies	3 copies	2 copies	2 copies	2 copies	2 copies	3 copies	2 copies	3 copies	3 copies		F
32	M	54	Standard		KRAS,TYK2	0.82	2 copies	3 copies	2 copies	2 copies	2 copies	2 copies	3 copies	3 copies	2 copies	2 copies	3 copies	3 copies	2 copies	2 copies	2 copies	2 copies	2 copies	2 copies	3 copies	3 copies	2 copies	2 copies	2 copies	2 copies	2 copies	3 copies	2 copies	2 copies	2 copies	3 copies	3 copies	3 copies	3 copies	2 copies	2 copies	2 copies	2 copies	3 copies	2 copies	2 copies	2 copies		M
36	F	55	Standard		ETV6,NRAS	0.81	2 copies	3 copies	2 copies	2 copies	2 copies	2 copies	3 copies	3 copies	2 copies	2 copies	3 copies	3 copies	2 copies	2 copies	2 copies	2 copies	2 copies	2 copies	3 copies	3 copies	2 copies	2 copies	2 copies	2 copies	2 copies	3 copies	2 copies	2 copies	2 copies	3 copies	3 copies	3 copies	3 copies	2 copies	2 copies	2 copies	2 copies	4 copies	2 copies	3 copies	3 copies		F
49	M	54	Standard		KRAS,SUZ12	72	2 copies	2 copies	2 copies	2 copies	2 copies	2 copies	3 copies	3 copies	2 copies	2 copies	3 copies	3 copies	2 copies	2 copies	2 copies	2 copies	2 copies	2 copies	3 copies	3 copies	2 copies	2 copies	2 copies	2 copies	2 copies	3 copies	2 copies	2 copies	2 copies	2 copies	2 copies	3 copies	3 copies	2 copies	2 copies	2 copies	2 copies	4 copies	2 copies	2 copies	2 copies		M
46	M	56	Standard		NRAS	85	2 copies	3 copies	2 copies	2 copies	2 copies	2 copies	3 copies	3 copies	2 copies	2 copies	3 copies	3 copies	2 copies	2 copies	2 copies	2 copies	2 copies	2 copies	3copies	3 copies	2 copies	2 copies	2 copies	2 copies	2 copies	3 copies	2 copies	2 copies	2 copies	3 copies	3 copies	3 copies	3 copies	2 copies	2 copies	2 copies	2 copies	4copies	2 copies	2 copies	2 copies	2 copies	M
1	M	67	UPD,+3,+5,+7,+8,+9,+11,+12,+16	1,2	ARID1A,KMT2D,NOCR1	90	UPD	UPT	UPD	UPD	3 copies	3 copies	3 copies	3 copies	3 copies	3 copies	3 copies	3 copies	3 copies	3 copies	3 copies	3 copies	3 copies	3 copies	4 copies	4 copies	3 copies	3 copies	3 copies	3 copies	2 copies	4 copies	2 copies	3 copies	3 copies	3 copies	3 copies	4 copies	4 copies	2 copies	PARTIAL DUP	2 copies	2 copies	4 copies	3 copies	2 COPIES	2 COPIES		M
12	M	62	UPD +2,+3+5+8+11+15+16+iso7q	13	NCOR1,NRAS	88	2 copies	3 copies	subclonal 3 copies (33%)	subclonal 3 copies (33%)	3 copies	3 copies	3 copies	SEG 3 copies	3 copies	3 copies	3 copies	SEG 3 copies	2 copies	3 copies	3 copies	3 copies	2 copies	2 copies	3 copies	3 copies	3 copies	3 copies	2 copies	3 copies	UPD	3 copies	3 copies	3 copies	3 copies	3 copies	3 copies	3 copies	3 copies	2 copies	2 copies	2 copies	2 copies	4 copies	2 copies	2 copies	2 copies		M
13	F	63	UPD+3+5+8+11+16	19,20	NA	93	2 copies	2 copies	3 copies	3 copies	3 copies	3 copies	3 copies	3 copies	3 copies	3 copies	3 copies	3 copies	2 copies	2 copies	3 copies	3 copies	2 copies	2 copies	3 copies	3 copies	3 copies	3 copies	3 copies	3 copies	2 copies	3 copies	UPD	3 copies	3copies	3 copies	3copies	3 copies	3copies	UPD	UPD	UPD	UPD	4 copies	3 copies	3 copies	3 copies		F
18	M	55	UPD	7,9	NA	86	2 copies	3 copies	2 copies	2 copies	2 copies	2 copies	3 copies	3 copies	2 copies	2 copies	3 copies	3 copies	UPD	UPD	2 copies	2 copies	UPD	UPD	3 copies	3 copies	2 copies	2 copies	2 copies	2 copies	2 copies	3 copies	2 copies	2 copies	2 copies	3 copies	3copies	3 copies	3copies	2 copies	2 copies	2 copies	2 copies	4 copies (3+1)	2 copies	2 copies	2 copies		M
22	M	61	UPD+5+8+11	15	NA	0.59	2 copies	3 copies	3 copies	seg 3 copies	2 copies	2 copies	3 copies	3 copies	3 copies	3 copies	3 copies	3 copies	2 copies	2 copies	4 copies	4 copies	2 copies	2 copies	3 copies	3 copies	3 copies	3 copies	3 copies	3 copies	2 copies	3 copies	UPD	2 copies	2 copies	3 copies	3 copies	3 copies	3 copies	2 copies	2 copies	2 copies	2 copies	4 copies	2 copies	2 copies	seg 3 copies		M
24	F	55	UPD+8	10	KRAS ,NR3c1	0.91	2 copies	2 copies	2 copies	2 copies	2 copies	2 copies	3 copies	3 copies	2 copies	2 copies	3 copies	3 copies	2 copies	2 copies	3 copies	3 copies	2 copies	2 copies	UPD	UPD	2 copies	2 copies	2 copies	2 copies	2 copies	4 copies	2 copies	2 copies	2 copies	3 copies	3 copies	2 copies	2 copies	2 copies	2 copies	2 copies	2 copies	4 copies	2 copies	3 copies	3 copies		F
26	M	55	Subclonal UPD	subclonal 9	KRAS,TYK2	0.88	2 copies	4 copies	2 copies	2 copies	2 copies	2 copies	3 copies	3 copies	2 copies	2 copies	3 copies	3 copies	2 copies	2 copies	2 copies	2 copies	subclonal UPD	subclonal UPD	3 copies	3 copies	2 copies	2 copies	2 copies	2 copies	2 copies	3 copies	2 copies	2 copies	2 copies	3 copies	3 copies	3 copies	3 copies	2 copies	2 copies	2 copies	2 copies	4 copies	2 copies	2 copies	2copies		M
25	F	58	UPD+8+11	2,9,19	TYK2	0.82	2 copies	3 copies	UPD	UPD	2 copies	2 copies	3 copies	3 copies	2 copies	Seg. Dup	3 copies	3 copies	2 copies	2 copies	3 copies	3 copies	UPD	UPD	3 copies	3 copies	3 copies	3 copies	2 copies	3 copies	2 copies	3 copies	2 copies	2 copies	2 copies	3 copies	3 copies	3 copies	3 copies	UPD	UPD	2 copies	2 copies	4 copies	3 copies	3 copies	3 copies		F
44	F	52	UPD	9	CREBBP	54	2 copies	2 copies	2 copies	2 copies	2 copies	2 copies	3 copies	3 copies	2 copies	2 copies	3 copies	3 copies	2 copies	2 copies	2 copies	2 copies	UPD	UPD	2 copies	2 copies	2 copies	2 copies	2 copies	2 copies	2 copies	3 copies	2 copies	2 copies	2 copies	3 copies	3 copies	2 copies	2 copies	2 copies	2 copies	2 copies	2 copies	3 copies	2 copies	3 copies	3 copies		F
28	M	58	Subclonal UPD+5+7+16	3,11,subclonal UPD 9	CREBBP	0.91	2 copies	3 copies	2 copies	2 copies	UPD	UPD	4copies	4 copies	3 copies	3 copies	3 copies	3 copies	1 copy	3 copies	subclonal 3 copies	subclonal 3 copies	subclonal UPD	subclonal UPD	3 copies	3 copies	UPD	UPD	2 copies	2 copies	2 copies	3 copies	2 copies	3 copies	3 copies	3 copies	3 copies	3 copies	3 copies	2 copies	2 copies	2 copies	2 copies	3 copies	2 copies	2 copies	2 copies		M
[truncated: 8 more columns]
